# Supplementary material for: Convenient access to pyrrolidin-3-ylphosphonic acids and tetrahydro-2H-pyran-3-ylphosphonates with multiple contiguous stereocenters from nonracemic adducts of a Ni(II)-catalyzed Michael reaction
Source: publisher site journal article supplement (doi:10.3762/bjoc.16.174), 2020-08-25
Supplement: Additional file 1 [file 1860-5397-16-174-S1.pdf]

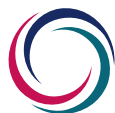

## Supporting Information

for

### **Convenient access to pyrrolidin-3-ylphosphonic acids and tetrahydro-2H-pyran-3-ylphosphonates with multiple contiguous stereocenters from nonracemic adducts of a Ni(II)-catalyzed Michael reaction**

Alexander N. Reznikov, Dmitry S. Nikerov, Anastasiya E. Sibiryakova, Victor B. Rybakov, Evgeniy V. Golovin and Yuri N. Klimochkin

*Beilstein J. Org. Chem.* **2020**, *16*, 2073–2079. doi:10.3762/bjoc.16.174

**Experimental procedures, copies of NMR, FTIR, and mass spectra, HPLC and X-ray diffraction data**



## Table of contents

|                                                                    |      |
|--------------------------------------------------------------------|------|
| 1. General information.....                                        | S3   |
| 2. Synthesis of initial compounds.....                             | S4   |
| 3. Catalysis.....                                                  | S15  |
| 4. Synthesis of pyrrolidin-3-ylphosphonic acids.....               | S22  |
| 5. Synthesis of tetrahydro-2 <i>H</i> -pyran-3-ylphosphonates..... | S33  |
| 6. Copies of NMR and FTIR spectra for initial compounds.....       | S40  |
| 7. Copies of NMR, FTIR and mass spectra for phosphonates 6a–f..... | S72  |
| 8. Copies of NMR, FTIR and mass spectra for compounds 7–14.....    | S92  |
| 9. Copies of HPLC chromatograms for compounds 6a–d,f and 13b.....  | S147 |
| 10. X-ray diffraction data of compounds 10a and 13b.....           | S155 |
| References.....                                                    | S161 |



## 1. General information

All commercially obtained reagents were used without further purification. All solvents were distilled prior to use. Dimethyl 2-oxopropylphosphonate **Vle** [1] and dimethyl 2-(adamantan-1-yl)-2-oxoethyl phosphonate **Vlf** [2] were obtained according to reported procedures. Other  $\beta$ -keto phosphonates **Via–d** were synthesized following the modified Corbel's procedures [3] (see below). Bis[(1*R*,2*R*)-*N,N*-dibenzylcyclohexane-1,2-diamine- $\kappa^2N,N'$ ](dibromo)nickel **VIII** was obtained according to a reported procedure [4]. Melting points were measured with an OptiMelt automated melting point system. All the reactions were monitored by TLC, performed on precoated silica gel plates (Sorbfil); compounds were made visible with I<sub>2</sub>. <sup>1</sup>H, <sup>13</sup>C and <sup>31</sup>P NMR spectra were recorded with a JEOL JNM-ECX400 spectrometer at 399.78, 100.53 and 161.83 MHz, respectively, in CDCl<sub>3</sub>, DMSO-*d*<sub>6</sub> and D<sub>2</sub>O solution. FTIR spectra were recorded with a Shimadzu IR Affinity-1 spectrophotometer with Specac® Quest ATR. Elemental analysis was performed with an EuroVector EA-3000 analyzer. High-resolution mass spectrometry was recorded with an Agilent AccuTOF 6230 mass-spectrometer. Optical rotations were measured with Rudolph Research Analytical (Autopol V Plus Automatic Polarimeter). The enantiomeric purity of the products was determined by HPLC analysis on Shimadzu Prominence LC-20AD (Spd-20auv vis detector, Cto-20a column over, Dgu-20a degasing unit) equipped with a chiral stationary phase column (ChiralPAK AD-3) with hexane/2-propanol as eluent and with a chiral stationary phase column ChiralPAK AD-3R with water/acetonitrile as eluent. Column chromatography was performed on Silica gel 60, Merck (230–400 mesh). X-ray crystallographic data were collected using a Enraf-Nonius CAD-4 diffractometer.



## 2. Synthesis of initial compounds

The initial 4-nitro-2-oxophosphonates were synthesized according to scheme S1:

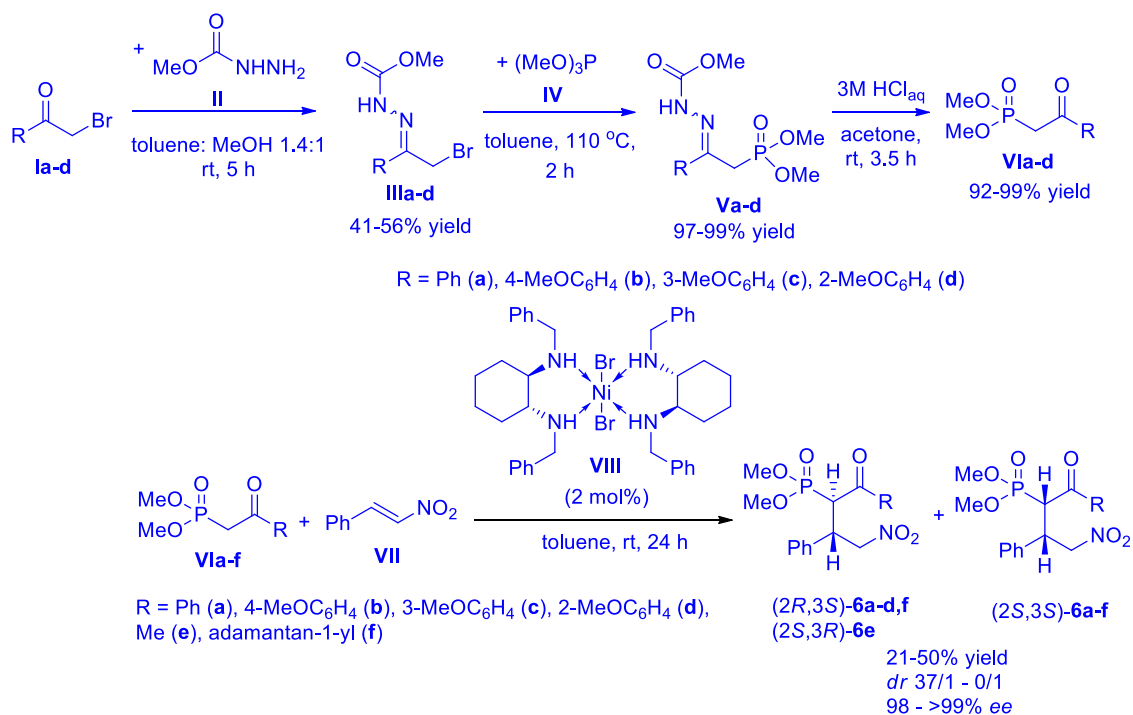

**Scheme S1:** General scheme for the synthesis of initial compounds.

**General procedure for the synthesis of methyl 2-(2-bromo-1-arylethylidene)-hydrazine-1-carboxylates IIIa-d.**

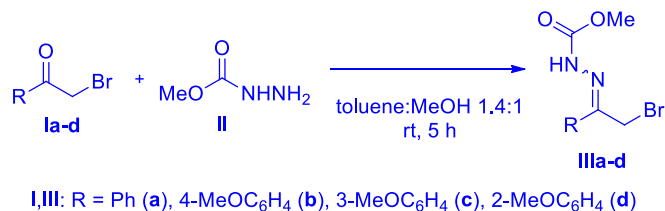

**Scheme S2:** Synthesis of methyl 2-(2-bromo-1-arylethylidene)hydrazine-1-carboxylates IIIa-d.



A solution of  $\alpha$ -bromoketone **la-d** (93.8 mmol) and methylhydrazine carboxylate **II** (85.3 mmol) in toluene (84 mL) and methanol (59 mL) was stirred for 10 h at 25 °C. Then it was kept at -10 °C for 2 h. The precipitate was filtered off and recrystallized from acetone.

**Methyl 2-(2-bromo-1-phenylethylidene)hydrazine-1-carboxylate (IIIa).**

Mixture of isomers 2.2:1. Yield: 10.4 g (45%), white crystals,  
m.p. 130-131 °C (acetone).

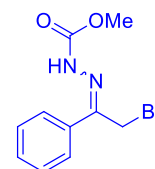

$^1\text{H}$  NMR (400 MHz,  $\text{CDCl}_3$ , 298 K)  $\delta$  [ppm] 8.63 (br s, 1H, NH, minor isomer), 7.87 (br s, 1H, NH, major isomer), 7.72-7.71 (m, 1H, aromatic, major isomer), 7.50-7.42 (m, 2H, aromatic, major isomer, 2H, aromatic, minor isomer), 7.35-7.34 (m, 1H, aromatic, major isomer, 1H, aromatic, minor isomer), 7.27-7.25 (m, 1H, aromatic, major isomer, 2H, aromatic, minor isomer), 4.29 (s, 2H,  $\text{CH}_2$ , major isomer), 4.25 (s, 2H,  $\text{CH}_2$ , minor isomer), 3.83 (s, 3H, Me, minor isomer), 3.74 (s, 3H, Me, major isomer).

$^{13}\text{C}$  NMR (101 MHz,  $\text{CDCl}_3$ , 298 K)  $\delta$  [ppm] 154.5 (s,  $\text{C}=\text{O}$ , minor isomer), 153.8 (s,  $\text{C}=\text{O}$ , major isomer), 149.1 (s,  $\text{C}=\text{N}$ , major isomer), 145.7 (s,  $\text{C}=\text{N}$ , minor isomer), 135.4 (s, aromatic, C, major isomer), 134.0 (s, aromatic, C, minor isomer), 130.7 (s, aromatic, CH, minor isomer), 130.4 (s, aromatic, CH, major isomer), 129.8 (s, aromatic, 2CH, major isomer), 128.8 (s, aromatic, 2CH, minor isomer), 127.7 (s, aromatic, 2CH, major isomer), 126.3 (s, aromatic, 2CH, minor isomer), 53.4 (s, Me, major isomer), 53.2 (s, Me, minor isomer), 34.9 (s,  $\text{CH}_2$ , major isomer), 19.1 (s,  $\text{CH}_2$ , minor isomer).

Anal. Calcd. for  $\text{C}_{10}\text{H}_{11}\text{BrN}_2\text{O}_2$ : C, 44.30; H, 4.09; N 10.33. Found: C, 44.25; H, 4.14; N 10.37.

**Methyl 2-[2-bromo-1-(4-methoxyphenyl)ethylidene]hydrazine-1-carboxylate (IIIb).**

Mixture of isomers 2.0:1. Yield: 14.4 g (56%), white crystals,  
m.p. 128-129 °C (acetone).

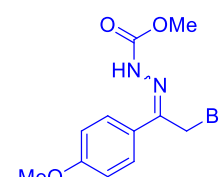

$^1\text{H}$  NMR (400 MHz,  $\text{CDCl}_3$ , 298 K)  $\delta$  [ppm] 8.25 (br.s, 1H, NH, minor



isomer), 7.91 (br.s, 1H, NH, major isomer), 7.70-7.68 (m, 2H, aromatic, minor isomer), 7.25-7.22 (m, 2H, aromatic, major isomer), 7.01-6.99 (m, 2H, aromatic, major isomer), 6.90-6.87 (m, 2H, aromatic, minor isomer), 4.30 (s, 2H, CH<sub>2</sub>, major isomer), 4.20 (s, 2H, CH<sub>2</sub>, minor isomer), 3.86-3.78 (m, 6H, 2Me, minor isomer, 6H, 2Me, major isomer).

<sup>13</sup>C NMR (101 MHz, CDCl<sub>3</sub>, 298 K) δ [ppm] 161.1 (s, aromatic, C(OMe), minor isomer), 160.9 (s, aromatic, C(OMe), major isomer), 154.4 (s, C=O, minor isomer), 153.8 (s, C=O, major isomer), 149.1 (s, C=N, major isomer), 145.9 (s, C=N, minor isomer), 129.2 (s, aromatic, 2CH, major isomer), 127.8 (s, aromatic, 2CH, minor isomer), 122.5 (s, aromatic, C, minor isomer, C, major isomer), 115.3 (s, aromatic, 2CH, major isomer), 114.2 (s, aromatic, 2CH, minor isomer), 55.5 (s, 2Me, major isomer), 53.4 (s, 2Me, minor isomer), 35.2 (s, CH<sub>2</sub>, major isomer), 18.9 (s, CH<sub>2</sub>, minor isomer).

IR (ATR) ν [cm<sup>-1</sup>] 3226 (w), 3170 (w), 3128 (w), 2956 (w), 2831 (w), 1707 (vs), 1604 (s), 1591 (s), 1514 (s), 1494 (s), 1469 (vs), 1413 (s), 1363 (vs), 1303 (vs), 1251 (vs), 1201 (s), 1178 (s), 1149 (s), 1066 (vs), 833 (vs), 812 (s), 796 (s), 686 (s), 607 (s), 555 (s), 534 (vs).

Anal. Calcd for C<sub>11</sub>H<sub>13</sub>BrN<sub>2</sub>O<sub>3</sub>: C, 43.87; H, 4.35; N 9.30. Found: C, 43.81; H, 4.39; N 9.39.

**Methyl 2-[2-bromo-1-(3-methoxyphenyl)ethylidene]hydrazine-1-carboxylate (IIIc).**

Mixture of isomers 1.9:1. Yield: 10.5 g (41%); white crystals;

m.p. 129-130 °C (acetone).

<sup>1</sup>H NMR (400 MHz, CDCl<sub>3</sub>, 298 K) δ [ppm] 8.63 (br.s, 1H, NH, minor isomer), 7.93 (br.s, 1H, NH, major isomer), 7.41-7.25 (m, 2H, aromatic, minor isomer, 2H, major isomer), 6.97-6.77 (m, 2H, aromatic, minor isomer, 2H, major isomer), 4.28 (s, 2H, CH<sub>2</sub>, major isomer), 4.23 (s, 2H, CH<sub>2</sub>, minor isomer), 3.83 (s, 6H, 2Me, minor isomer), 3.79 (s, 6H, 2Me, major isomer).

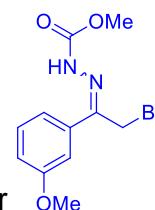



$^{13}\text{C}$  NMR (101 MHz,  $\text{CDCl}_3$ , 298 K)  $\delta$  [ppm] 160.5 (s, aromatic, C(OMe), major isomer), 159.9 (s, aromatic, C(OMe), minor isomer), 154.5 (s, C=O, minor isomer), 153.8 (s, C=O, major isomer), 148.9 (s, C=N, major isomer), 145.6 (s, C=N, minor isomer), 136.9 (s, aromatic, C, minor isomer), 131.9 (s, aromatic, C, major isomer), 131.1 (s, aromatic, CH, major isomer), 129.7 (s, aromatic, CH, minor isomer), 119.6 (s, aromatic, CH, major isomer), 118.7 (s, aromatic, CH, minor isomer), 115.8 (s, aromatic, CH, major isomer), 115.6 (s, aromatic, CH, minor isomer), 113.2 (s, aromatic, CH, major isomer), 111.7 (s, aromatic, CH, minor isomer), 55.5 (s, 2Me, major isomer), 53.4 (s, 2Me, minor isomer), 34.8 (s,  $\text{CH}_2$ , major isomer), 19.2 (s,  $\text{CH}_2$ , minor isomer).

IR (ATR)  $\nu$  [ $\text{cm}^{-1}$ ] 3226 (w), 3124 (w), 2956 (w), 2831 (w), 1714 (vs), 1608 (s), 1591 (s), 1570 (s), 1469 (vs), 1429 (s), 1367 (vs), 1321 (s), 1292 (vs), 1222 (vs), 1155 (s), 1068 (vs), 1053 (vs), 1020 (vs), 856 (vs), 781 (vs), 682 (vs), 623 (s), 507 (s), 478 (s).

Anal. Calcd for  $\text{C}_{11}\text{H}_{13}\text{BrN}_2\text{O}_3$ : C, 43.87; H, 4.35; N 9.30. Found: C, 43.80; H, 4.43; N 9.36.

**Methyl 2-[2-bromo-1-(2-methoxyphenyl)ethylidene]hydrazine-1-carboxylate (IIId).**

Yield: 11.8 g (46%), white crystals, m.p. 135-137 °C (acetone).

$^1\text{H}$  NMR (400 MHz,  $\text{CDCl}_3$ , 298 K)  $\delta$  [ppm] 7.74 (br.s, 1H, NH), 7.44-7.40 (m, 1H, aromatic), 7.16-7.14 (m, 1H, aromatic), 7.05-6.97 (m, 2H, aromatic), 4.33 (s, 2H,  $\text{CH}_2$ ), 3.78 (s, 6H, 2Me).

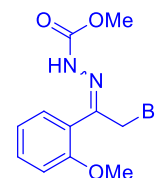

$^{13}\text{C}$  NMR (101 MHz,  $\text{CDCl}_3$ , 298 K)  $\delta$  [ppm] 156.2 (s, aromatic, C(OMe)), 153.9 (s, C=O), 147.5 (s, C=N), 132.1 (s, aromatic, CH), 129.9 (s, aromatic, CH), 121.4 (s, aromatic, CH), 118.8 (s, aromatic, C), 111.9 (s, aromatic, CH), 55.8 (s, 2Me), 34.9 (s,  $\text{CH}_2$ ).

IR (ATR)  $\nu$  [ $\text{cm}^{-1}$ ] 3226 (w), 3124 (w), 3026 (w), 2958 (w), 2837 (w), 1693 (vs), 1616 (m), 1597 (m), 1579 (m), 1471 (s), 1452 (s), 1367 (s), 1290 (m), 1273 (m), 1246 (vs), 1220 (s), 1132 (m), 1076 (vs), 1056 (s), 1024 (vs), 750 (vs), 690 (s), 559 (s), 518 (s).



Anal. Calcd for C<sub>11</sub>H<sub>13</sub>BrN<sub>2</sub>O<sub>3</sub>: C, 43.87; H, 4.35; N 9.30. Found: C, 43.81; H, 4.41; N 9.38.

**General procedure for the synthesis of methyl 2-[2-(dimethoxyphosphoryl)-1-arylethylidene]hydrazinecarboxylates Va–d.**

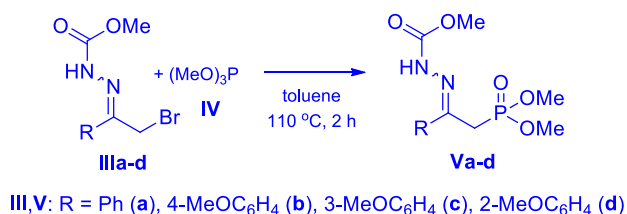

**Scheme S3:** Synthesis of methyl 2-[2-(dimethoxyphosphoryl)-1-arylethylidene]hydrazinecarboxylates **Va–d**

The resulting hydrazone **IIIa–d** (25.0 mmol) was added with stirring in an argon atmosphere for 1 h to a boiling solution of trimethyl phosphite **IV** (26.1 mmol) in toluene (25 mL). The mixture was stirred for 3 h, cooled and washed with water. The mixture was extracted with CHCl<sub>3</sub> (3 × 50 mL). The combined organic extracts were dried over Na<sub>2</sub>SO<sub>4</sub>, filtered, and evaporated in vacuo.

**Methyl 2-[2-(dimethoxyphosphoryl)-1-phenylethylidene]hydrazine-1-carboxylate (Va).**

Yield: 7.28 g (97%), yellow solid, m.p. 107-108 °C (toluene).

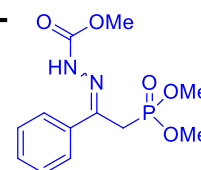

<sup>1</sup>H NMR (400 MHz, CDCl<sub>3</sub>, 298 K) δ [ppm] 9.85 (br s, 1H, NH), 7.70-7.68 (m, 2H, aromatic), 7.32-7.20 (m, 3H, aromatic), 3.73 (s, 3H, Me), 3.62 (d, <sup>3</sup>J<sub>HP</sub> = 11.2 Hz, 6H, 2MeO), 3.26 (d, <sup>2</sup>J<sub>HP</sub> = 23.2 Hz, 2H, CH<sub>2</sub>).

<sup>13</sup>C NMR (101 MHz, CDCl<sub>3</sub>, 298 K) δ [ppm] 155.5 (s, C=O), 143.8 (d, <sup>2</sup>J<sub>CP</sub> = 10.5 Hz, C=N), 137.0 (d, <sup>3</sup>J<sub>CP</sub> = 3.8 Hz, C), 129.6 (s, aromatic, CH), 128.5 (s, aromatic, 2CH),



126.6 (s, aromatic, 2CH), 53.6 (d,  $^2J_{CP}$  = 6.7 Hz, MeO), 52.8 (s, Me), 27.2 (d,  $^1J_{CP}$  = 137.1 Hz, CH<sub>2</sub>).

$^{31}\text{P}$  NMR (162 MHz, CDCl<sub>3</sub>, 298 K)  $\delta$  [ppm] 26.64.

Anal. Calcd for C<sub>12</sub>H<sub>17</sub>N<sub>2</sub>O<sub>5</sub>P: C, 48.00; H, 5.71; N 9.33. Found: C, 47.91; H, 5.79; N 9.36.

**Methyl 2-(2-(dimethoxyphosphoryl)-1-(4-methoxyphenyl)ethylidene)hydrazine-1-carboxylate (Vb).**

Mixture of isomers 8.0:1. Yield: 8.17 g (99%), yellow solid, m.p. 92-94 °C (toluene).

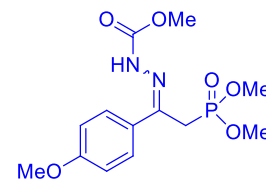

$^1\text{H}$  NMR (400 MHz, CDCl<sub>3</sub>, 298 K)  $\delta$  [ppm] 9.75 (br.s, 1H, NH, major isomer, 1H, NH, minor isomer), 7.68-7.66 (m, 2H, aromatic, minor isomer, 2H, aromatic, major isomer), 6.82-6.80 (m, 2H, aromatic, minor isomer, 2H, aromatic, major isomer), 3.75 (s, 3H, Me, minor isomer, 3H, Me, major isomer), 3.74 (s, 3H, Me, minor isomer, 3H, Me, major isomer), 3.64 (d,  $^3J_{HP}$  = 9.2 Hz, 6H, 2MeO, minor isomer,  $^3J_{HP}$  = 9.2 Hz, 6H, 2MeO, major isomer), 3.24 (d,  $^2J_{HP}$  = 22.7 Hz, 2H, CH<sub>2</sub>, major isomer,  $^2J_{HP}$  = 22.7 Hz, 2H, CH<sub>2</sub>, minor isomer).

$^{13}\text{C}$  NMR (101 MHz, CDCl<sub>3</sub>, 298 K)  $\delta$  [ppm] 160.9 (s, aromatic, C(OMe), major isomer), 160.6 (s, aromatic, C(OMe), minor isomer), 155.6 (s, C=O, minor isomer, C=O, major isomer), 144.0 (d,  $^2J_{CP}$  = 10.5 Hz, C=N), 129.5 (d,  $^3J_{CP}$  = 3.8 Hz, C, aromatic), 128.1 (s, aromatic, 2CH, minor isomer), 127.7 (s, aromatic, 2CH, major isomer), 115.0 (s, aromatic, 2CH, minor isomer), 113.9 (s, aromatic, 2CH, major isomer), 55.4 (s, Me, minor isomer, Me, major isomer), 53.6 (d,  $^2J_{CP}$  = 4.7 Hz, MeO, major isomer,  $^2J_{CP}$  = 4.7 Hz, MeO, minor isomer), 52.8 (s, Me, minor isomer, Me, major isomer), 35.8 (d,  $^1J_{CP}$  = 138.0 Hz, CH<sub>2</sub>, minor isomer), 27.1 (d,  $^1J_{CP}$  = 136.0 Hz, CH<sub>2</sub>, major isomer).

$^{31}\text{P}$  NMR (162 MHz, CDCl<sub>3</sub>, 298 K)  $\delta$  [ppm] 26.80 (major isomer), 26.63 (minor isomer).



IR (ATR)  $\nu$  [cm<sup>-1</sup>] 3174 (w), 2958 (w), 2908 (w), 2852 (w), 2837 (w), 1737 (vs), 1610 (s), 1544 (s), 1510 (s), 1442 (s), 1398 (s), 1325 (s), 1240 (vs), 1174 (vs), 1018 (vs), 966 (s), 879 (s), 831 (s), 802 (s), 775 (s), 756 (s), 738 (s), 630 (s), 582 (s), 532 (s).

Anal. Calcd for C<sub>13</sub>H<sub>19</sub>N<sub>2</sub>O<sub>6</sub>P: C, 47.28; H, 5.80; N 8.48. Found: C, 47.21; H, 5.89; N 8.48.

**Methyl 2-(2-(dimethoxyphosphoryl)-1-(3-methoxyphenyl)ethylidene)hydrazine-1-carboxylate (Vc).**

Mixture of isomers 7.1:1. Yield: 8.18 g (99%), yellow solid,  
m.p. 96-98 °C (toluene).

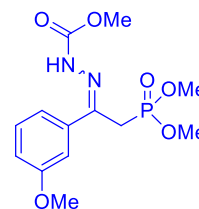

<sup>1</sup>H NMR (400 MHz, CDCl<sub>3</sub>, 298 K)  $\delta$  [ppm] 9.89 (br.s, 1H, NH, major isomer), 7.88 (br.s, 1H, NH, minor isomer), 7.35-7.11 (m, 3H, aromatic, minor isomer, 3H, aromatic, major isomer), 6.96-6.76 (m, 1H, aromatic, minor isomer, 1H, aromatic, major isomer), 3.77 (s, 6H, 2Me, minor isomer, 6H, 2Me, major isomer), 3.68 (d, <sup>3</sup>J<sub>HP</sub> = 11.2 Hz, 6H, 2MeO, minor isomer, <sup>3</sup>J<sub>HP</sub> = 11.2 Hz, 6H, 2MeO, major isomer), 3.27 (d, <sup>2</sup>J<sub>HP</sub> = 22.0 Hz, 2H, CH<sub>2</sub>, major isomer, <sup>2</sup>J<sub>HP</sub> = 22.0 Hz, 2H, CH<sub>2</sub>, minor isomer).

<sup>13</sup>C NMR (101 MHz, CDCl<sub>3</sub>, 298 K)  $\delta$  [ppm] 160.5 (s, aromatic, C(OMe), minor isomer), 159.8 (s, aromatic, C(OMe), major isomer), 155.5 (s, C=O, minor isomer, C=O, major isomer), 143.7 (d, <sup>2</sup>J<sub>CP</sub> = 10.5 Hz, C=N, minor isomer, <sup>2</sup>J<sub>CP</sub> = 10.5 Hz, C=N, major isomer), 138.5 (d, <sup>3</sup>J<sub>CP</sub> = 3.8 Hz, C, minor isomer, <sup>3</sup>J<sub>CP</sub> = 3.8 Hz, C, major isomer), 129.5 (s, aromatic, CH, major isomer), 129.1 (s, aromatic, CH, minor isomer), 119.1 (s, aromatic, CH, major isomer), 119.0 (s, aromatic, CH, minor isomer), 115.6 (s, aromatic, CH, major isomer, aromatic, CH, minor isomer), 111.9 (s, aromatic, CH, major isomer, aromatic, CH, minor isomer), 55.4 (s, Me, minor isomer, Me, major isomer), 53.7 (d, <sup>2</sup>J<sub>CP</sub> = 5.7 Hz, MeO), 52.9 (s, Me), 35.6 (d, <sup>1</sup>J<sub>CP</sub> = 138.0 Hz, CH<sub>2</sub>, minor isomer), 27.5 (d, <sup>1</sup>J<sub>CP</sub> = 137.1 Hz, CH<sub>2</sub>, major isomer).

<sup>31</sup>P NMR (162 MHz, CDCl<sub>3</sub>, 298 K)  $\delta$  [ppm] 26.65 (major isomer), 26.45 (minor isomer).



IR (ATR)  $\nu$  [cm<sup>-1</sup>] 3217 (w), 3003 (w), 2954 (w), 2852 (w), 1743 (s), 1720 (s), 1598 (m), 1575 (m), 1531 (s), 1487 (s), 1448 (s), 1431 (s), 1359 (m), 1220 (vs), 1182 (s), 1024 (vs), 974 (s), 910 (s), 860 (s), 806 (s), 786 (s), 727 (vs), 688 (s).

Anal. Calcd for C<sub>13</sub>H<sub>19</sub>N<sub>2</sub>O<sub>6</sub>P: C, 47.28; H, 5.80; N 8.48. Found: C, 47.28; H, 5.80; N 8.48.

**Methyl 2-(2-(dimethoxyphosphoryl)-1-(2-methoxyphenyl)ethylidene)hydrazine-1-carboxylate (Vd).**

Mixture of isomers 2.7:1. Yield: 8.17 g (99%), yellow solid, m.p. 89-91 °C (toluene).

<sup>1</sup>H NMR (400 MHz, CDCl<sub>3</sub>, 298 K)  $\delta$  [ppm] 9.92 (br.s, 1H, NH, major isomer), 7.73 (br.s, 1H, NH, minor isomer), 7.38-6.81 (m, 4H, aromatic, minor isomer, 4H, aromatic, major isomer), 3.76 (s, 6H, 2Me, minor isomer, 6H, 2Me, major isomer), 3.60 (d, <sup>3</sup>J<sub>HP</sub> = 11.1 Hz, 6H, 2MeO, minor isomer, <sup>3</sup>J<sub>HP</sub> = 11.1 Hz, 6H, 2MeO, major isomer), 3.39 (d, <sup>2</sup>J<sub>HP</sub> = 22.4 Hz, 2H, CH<sub>2</sub>, major isomer, <sup>2</sup>J<sub>HP</sub> = 22.4 Hz, 1H, CH<sub>2</sub>, minor isomer), 3.22 (d, <sup>2</sup>J<sub>HP</sub> = 22.4 Hz, 1H, CH<sub>2</sub>, minor isomer).

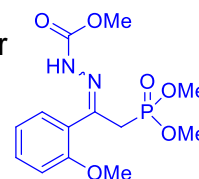

<sup>13</sup>C NMR (101 MHz, CDCl<sub>3</sub>, 298 K)  $\delta$  [ppm] 157.1 (s, aromatic, C(OMe), major isomer), 156.2 (s, C=O, minor isomer), 155.9 (s, aromatic, C(OMe), minor isomer), 155.5 (s, C=O, major isomer), 145.7 (d, <sup>2</sup>J<sub>CP</sub> = 10.5 Hz, C=N), 131.7 (s, aromatic, CH, minor isomer), 131.1 (s, aromatic, CH, major isomer), 130.9 (s, aromatic, CH, major isomer), 129.0 (s, aromatic, CH, minor isomer), 127.6 (s, aromatic, C, major isomer), 121.3 (s, aromatic, CH, minor isomer), 120.9 (s, aromatic, CH, major isomer), 120.7 (s, aromatic, C, minor isomer), 111.9 (s, aromatic, CH, minor isomer), 110.9 (s, aromatic, CH, major isomer), 55.7 (s, Me, minor isomer), 55.5 (s, Me, major isomer), 53.2 (d, <sup>2</sup>J<sub>CP</sub> = 5.7 Hz, MeO, major isomer), 52.8 (s, Me, minor isomer, major isomer), 52.7 (d, <sup>2</sup>J<sub>CP</sub> = 5.7 Hz, MeO, minor isomer), 34.9 (d, <sup>1</sup>J<sub>CP</sub> = 138.0 Hz, CH<sub>2</sub>, minor isomer), 29.5 (d, <sup>1</sup>J<sub>CP</sub> = 134.2 Hz, CH<sub>2</sub>, major isomer).



$^{31}\text{P}$  NMR (162 MHz,  $\text{CDCl}_3$ , 298 K)  $\delta$  [ppm] 27.55 (major isomer), 27.00 (minor isomer).  
 IR (ATR)  $\nu$  [ $\text{cm}^{-1}$ ] 3211 (w), 2999 (w), 2953 (w), 1747 (s), 1720 (s), 1598 (m), 1579 (w), 1490 (s), 1458 (s), 1436 (s), 1359 (m), 1303 (m), 1236 (vs), 1220 (vs), 1020 (vs), 968 (s), 879 (s), 842 (s), 802 (s), 752 (vs).

Anal. Calcd for  $\text{C}_{13}\text{H}_{19}\text{N}_2\text{O}_6\text{P}$ : C, 47.28; H, 5.80; N 8.48. Found: C, 47.28; H, 5.80; N 8.48.

### General procedure for the synthesis of $\beta$ -keto phosphonates **Via-d**.

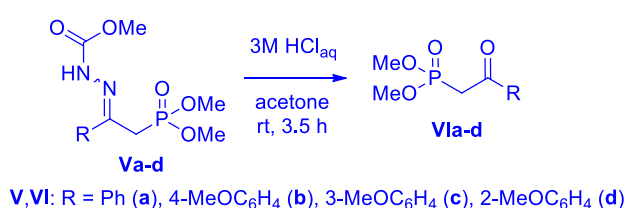

### Scheme S4: Synthesis of $\beta$ -keto phosphonates **Via-d**

Hydrochloric acid (3M, 12 mL) was added to a solution of methyl 2-[2-(dimethoxyphosphoryl)-1-arylethylidene]hydrazinecarboxylate **Va-d** (20 mmol) in acetone (12 mL). The resulting mixture was stirred for 3.5 h at rt, then the acetone was removed in vacuo and the residue was extracted with  $\text{CHCl}_3$  (3  $\times$  50 mL). The combined organic layers were dried ( $\text{Na}_2\text{SO}_4$ ) and evaporated to give the  $\beta$ -keto phosphonates.

#### Dimethyl (2-oxo-2-phenylethyl)phosphonate (**Vla**).

Yield: 2.26 g (99%); pale yellow oil.

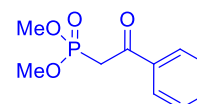

$^1\text{H}$  NMR (400 MHz,  $\text{CDCl}_3$ , 298 K)  $\delta$  [ppm] 7.93-7.90 (m, 2H, Ph), 7.53-7.48 (m, 1H, Ph), 7.41-7.36 (m, 2H, Ph), 3.68 (d,  $^3J_{\text{HP}}$  = 11.2 Hz, 6H,  $\text{CH}_3\text{O}$ ), 3.57 (d,  $^2J_{\text{HP}}$  = 22.7 Hz, 2H,  $\text{CH}_2$ ).



$^{13}\text{C}$  NMR (101 MHz,  $\text{CDCl}_3$ , 298 K)  $\delta$  [ppm] 191.8 (s, C=O), 136.4 (s, C, Ph), 133.8 (s, CH, Ph), 129.0 (s, CH, Ph), 128.7 (s, CH, Ph), 53.2 (d,  $\text{CH}_3\text{O}$ ,  $^2J_{\text{CP}} = 1.9$  Hz), 37.5 (d,  $\text{CH}_2$ ,  $^1J_{\text{CP}} = 130.6$  Hz).

$^{31}\text{P}$  NMR (162 MHz,  $\text{CDCl}_3$ , 298 K)  $\delta$  [ppm] 23.44.

Anal. Calcd for  $\text{C}_{10}\text{H}_{13}\text{O}_4\text{P}$ : C, 52.64; H, 5.74. Found: C, 52.58; H, 5.81.

**Dimethyl [2-(4-methoxyphenyl)-2-oxoethyl]phosphonate (VIb).**

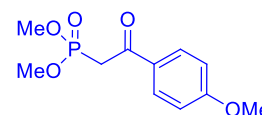

Yield: 2.45 g (95%); pale yellow oil.

$^1\text{H}$  NMR (400 MHz,  $\text{CDCl}_3$ , 298 K)  $\delta$  [ppm] 7.75 (d,  $^3J_{\text{HH}} = 9.0$  Hz, 2H, aromatic), 6.71 (d,  $^3J_{\text{HH}} = 9.0$  Hz, 2H, aromatic), 3.63 (s, 3H,  $\text{CH}_3\text{O}$ ), 3.54 (d,  $^3J_{\text{HP}} = 11.2$  Hz, 6H,  $\text{CH}_3\text{O}$ ), 3.39 (d,  $^2J_{\text{HP}} = 22.7$  Hz, 2H,  $\text{CH}_2$ ).

$^{13}\text{C}$  NMR (101 MHz,  $\text{CDCl}_3$ , 298 K)  $\delta$  [ppm] 190.0 (d,  $^2J_{\text{CP}} = 5.7$  Hz, C=O), 164.0 (s, C, aromatic), 131.3 (s, CH, aromatic), 129.3 (d,  $^3J_{\text{CP}} = 2.9$  Hz, C, aromatic), 113.8 (s, CH, aromatic), 54.4 (s,  $\text{CH}_3\text{O}$ ), 53.5 (d,  $^2J_{\text{CP}} = 5.7$  Hz,  $\text{CH}_3\text{O}$ ), 36.5 (d,  $^1J_{\text{CP}} = 129.6$  Hz,  $\text{CH}_2$ ).

$^{31}\text{P}$  NMR (162 MHz,  $\text{CDCl}_3$ , 298 K)  $\delta$  [ppm] 23.87.

IR (ATR)  $\nu$  [ $\text{cm}^{-1}$ ] 3007 (w), 2955 (w), 2845 (w), 1667 (s), 1597 (s), 1574 (m), 1512 (m), 1460 (m), 1421 (m), 1315 (m), 1283 (m), 1250 (vs), 1173 (s), 1134 (m), 1113 (m), 1053 (s), 1020 (vs), 989 (vs), 878 (m), 829 (s), 799 (vs), 721 (m), 644 (w), 631 (w), 567 (s), 517 (s).

Anal. Calcd for  $\text{C}_{11}\text{H}_{15}\text{O}_5\text{P}$ : C, 51.17; H, 5.86. Found: C, 51.07; H, 5.89.

**Dimethyl [2-(3-methoxyphenyl)-2-oxoethyl]phosphonate (VIc).**

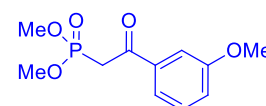

Yield: 2.45 g (95%); pale yellow oil.

$^1\text{H}$  NMR (400 MHz,  $\text{CDCl}_3$ , 298 K)  $\delta$  [ppm] 7.55-7.44 (m, 1H, CH), 7.38-7.31 (m, 2H, CH), 7.02-6.95 (m, 1H, CH), 3.67 (s, 3H,  $\text{CH}_3\text{O}$ ), 3.52 (d,  $^3J_{\text{HP}} = 11.2$  Hz, 6H,  $\text{CH}_3\text{O}$ ), 3.36 (d,  $^2J_{\text{HP}} = 22.7$  Hz, 2H,  $\text{CH}_2$ ).

$^{13}\text{C}$  NMR (101 MHz,  $\text{CDCl}_3$ , 298 K)  $\delta$  [ppm] 192.5 (d,  $^2J_{\text{CP}} = 5.8$  Hz, C=O), 161.2 (s, C, aromatic), 137.1 (s, C, aromatic), 133.1 (s, CH, aromatic), 123.6 (s, CH, aromatic),



121.3 (s, CH, aromatic), 113.0 (s, CH, aromatic), 54.3 (s, CH<sub>3</sub>O), 53.3 (d, <sup>2</sup>J<sub>CP</sub> = 5.7 Hz, CH<sub>3</sub>O), 36.2 (d, <sup>1</sup>J<sub>CP</sub> = 129.6 Hz, CH<sub>2</sub>).

<sup>31</sup>P NMR (162 MHz, CDCl<sub>3</sub>, 298 K) δ [ppm] 23.87.

IR (ATR) ν [cm<sup>-1</sup>] 2999 (w), 2954 (w), 2853 (w), 1678 (s), 1597 (m), 1584 (m), 1487 (m), 1450 (m), 1429 (m), 1252 (vs), 1182 (s), 1128 (w), 1022 (vs), 864 (s), 841 (s), 791 (vs), 746 (vs), 685 (m), 665 (m), 596 (w), 542 (m), 517 (s).

Anal. Calcd for C<sub>11</sub>H<sub>15</sub>O<sub>5</sub>P: C, 51.17; H, 5.86. Found: C, 51.11; H, 5.93.

**Dimethyl [2-(2-methoxyphenyl)-2-oxoethyl]phosphonate (VId).**

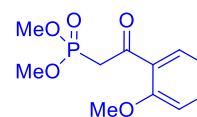

Yield: 2.38 g (92%), pale yellow oil.

<sup>1</sup>H NMR (400 MHz, CDCl<sub>3</sub>, 298 K) δ [ppm] 7.69 (dd, <sup>3</sup>J<sub>HH</sub> = 7.3 Hz, <sup>4</sup>J<sub>HH</sub> = 1.6 Hz, 1H, aromatic), 7.45 (dt, <sup>3</sup>J<sub>HH</sub> = 7.9 Hz, <sup>4</sup>J<sub>HH</sub> = 1.8 Hz, 1H, aromatic), 6.98-6.92 (m, 2H, aromatic), 3.89 (s, 3H, CH<sub>3</sub>O), 3.78 (d, <sup>2</sup>J<sub>HP</sub> = 21.5 Hz, 2H, CH<sub>2</sub>), 3.70 (d, <sup>3</sup>J<sub>HP</sub> = 11.2 Hz, 6H, CH<sub>3</sub>O).

<sup>13</sup>C NMR (101 MHz, CDCl<sub>3</sub>, 298 K) δ [ppm] 193.4 (d, <sup>2</sup>J<sub>CP</sub> = 6.7 Hz, C=O), 158.8 (s, C, aromatic), 134.6 (s, CH, aromatic), 131.0 (s, CH, aromatic), 127.4 (d, <sup>3</sup>J<sub>CP</sub> = 3.4 Hz, C, aromatic), 120.9 (s, CH, aromatic), 111.7 (s, CH, aromatic), 55.7 (s, CH<sub>3</sub>O), 52.9 (d, <sup>2</sup>J<sub>CP</sub> = 1.9 Hz, CH<sub>3</sub>O), 41.2 (d, <sup>1</sup>J<sub>CP</sub> = 131.6 Hz, CH<sub>2</sub>).

<sup>31</sup>P NMR (162 MHz, CDCl<sub>3</sub>, 298 K) δ [ppm] 24.79.

IR (ATR) ν [cm<sup>-1</sup>] 3003 (w), 2953 (w), 2851 (w), 1667 (m), 1597 (m), 1578 (w), 1485 (m), 1464 (m), 1437 (m), 1395 (w), 1296 (s), 1242 (vs), 1182 (m), 1163 (m), 1144 (w), 1101 (w), 1018 (vs), 1001 (vs), 876 (m), 843 (m), 800 (s), 756 (vs), 731 (s), 700 (m), 662 (w), 586 (m), 513 (m).

Anal. Calcd for C<sub>11</sub>H<sub>15</sub>O<sub>5</sub>P: C, 51.17; H, 5.86. Found: C, 51.09; H, 5.92.



### 3. Catalysis

#### General procedure for catalytic asymmetric Michael addition of $\beta$ -keto phosphonates to $\omega$ -nitrostyrene in the presence of a Ni(II) complex.

A mixture of  $\beta$ -keto phosphonate **Vla–f** (8.10 mmol),  $\omega$ -nitrostyrene **VII** (8.90 mmol) and bis[(1*R*,2*R*)-*N,N*-dibenzylcyclohexane-1,2-diamine- $\kappa^2N,N'$ ](dibromo)nickel **VIII** (0.16 mmol) in 10 mL of toluene was stirred at rt for 24 h. The formed crystalline product was filtered and recrystallized from appropriate solvent (MeOH for **6a,d,e,f**; EtOH for **6c**; toluene for **6b**) to give an individual diastereomer.

**Table S1:** Asymmetric Michael addition of  $\beta$ -keto phosphonates to  $\omega$ -nitrostyrene in the presence of bis[(1*R*,2*R*)-*N,N*-dibenzylcyclohexane-1,2-diamine- $\kappa^2N,N'$ ](dibromo)nickel

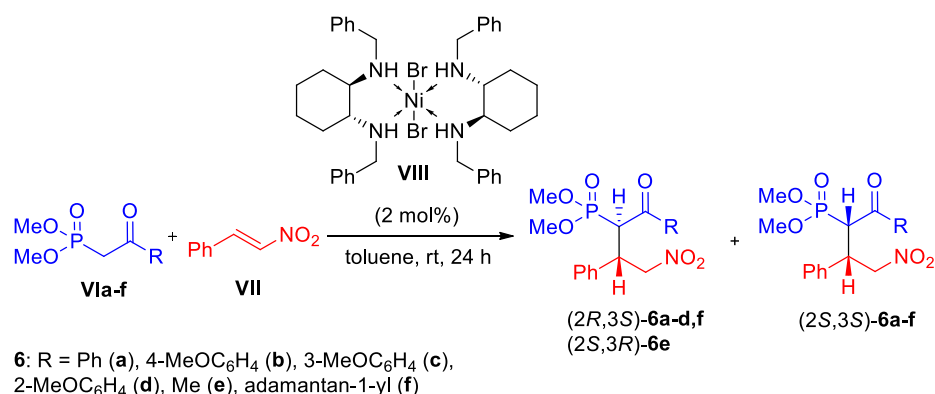

| Entry          | R                                  | Compd.    | Conv.,<br>% | dr <sup>a</sup> | ee <sup>a</sup> ,<br>% | Yield <sup>b</sup> ,<br>% | dr <sup>c</sup> | ee <sup>c</sup> ,<br>% |
|----------------|------------------------------------|-----------|-------------|-----------------|------------------------|---------------------------|-----------------|------------------------|
| 1 <sup>d</sup> | Ph                                 | <b>6a</b> | 90          | 37/1            | >99                    | 45                        | 37/1            | >99                    |
| 2              | 4-MeOC <sub>6</sub> H <sub>4</sub> | <b>6b</b> | 92          | 13/1            | 97                     | 46                        | 1/–             | 98                     |
| 3              | 3-MeOC <sub>6</sub> H <sub>4</sub> | <b>6c</b> | 87          | 12/1            | 86                     | 45                        | 14/1            | >99                    |
| 4              | 2-MeOC <sub>6</sub> H <sub>4</sub> | <b>6d</b> | 82          | 1/2             | 83                     | 50                        | –/1             | 98                     |
| 5              | Me                                 | <b>6e</b> | 86          | 1.2/1           | ND <sup>e</sup>        | 46                        | 11/1            | >99 <sup>f</sup>       |
| 6 <sup>d</sup> | 1-Ad                               | <b>6f</b> | 81          | 1/1.8           | 85                     | 21                        | 1/25            | >99                    |



<sup>a</sup>dr (by <sup>31</sup>P NMR) and ee (by chiral HPLC) in reaction mixture; <sup>b</sup>isolated yield; <sup>c</sup>dr (by <sup>31</sup>P NMR) and ee (by chiral HPLC) after crystallization; <sup>d</sup>previously reported data [2,5]; <sup>e</sup>not determined; <sup>f</sup>The enantiomeric excess for compound **6e** could not be determined by HPLC due to overlapping peaks of the corresponding enantiomers in the chromatograms. For this reason, the value of the ee was determined on the basis of HPLC analysis of its derivative - compound **13b** (see below).

The absolute (2*R*,3*S*)-configuration of compound **6a** was determined earlier by X-ray diffraction analysis [5]. The absolute configurations of other Michael adducts **6b–f** were assumed by analogy and is additionally confirmed by X-ray diffraction data for **13b** (see below), since the absolute configuration of the stereo center at C-2 in **6e** does not change during the transformation of **6e** to **13b**. The relative configurations of **6b–f** were also confirmed by comparing the NMR spectra of these compounds and **6a**. For (2*R*,3*S*)-isomers the values of <sup>3</sup>J<sub>HH</sub> for proton at 2-C were 6.6–6.9 Hz, while for (2*S*,3*S*)-isomers these values were 11 Hz. A characteristic difference in the values of the spin – spin coupling constants was previously observed for structurally similar phosphonates [5] and sulfones [6].

#### Dimethyl [(2*R*,3*S*)-4-nitro-1-oxo-1,3-diphenylbutan-2-yl]phosphonate (**6a**) [5]

Yield: 1.13 g (45%), white crystals, m.p. 160–162 °C (methanol).

[α]<sub>D</sub><sup>20</sup> -40.0 (c 2.5, CHCl<sub>3</sub>), dr 1:-, > 99% ee.

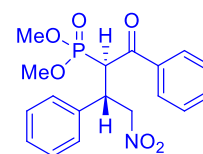

<sup>1</sup>H NMR (400 MHz, CDCl<sub>3</sub>, 298 K) δ [ppm] 7.79-7.77 (m, 2H, aromatic), 7.56-7.52 (m, 1H, aromatic), 7.42-7.38 (m, 2H, aromatic), 7.27-7.18 (m, 5H, aromatic), 5.14-5.01 (m, 2H, H-4), 4.63 (dd, <sup>2</sup>J<sub>HP</sub> = 23.6 Hz, <sup>3</sup>J<sub>HH</sub> = 7.2 Hz, 1H, H-2), 4.42-4.30 (m, 1H, H-3), 3.55 (d, <sup>3</sup>J<sub>HP</sub> = 10.4 Hz, 3H, MeO), 3.52 (d, <sup>3</sup>J<sub>HP</sub> = 10.0 Hz, 3H, MeO).

<sup>13</sup>C NMR (101 MHz, CDCl<sub>3</sub>, 298 K) δ [ppm] 195.5 (d, <sup>2</sup>J<sub>CP</sub> = 4.8 Hz, C-1), 137.43 (d, <sup>3</sup>J<sub>CP</sub> = 9.5 Hz, aromatic, C), 137.27 (s, aromatic, C), 134.1 (s, aromatic, CH), 129.1 (s,



aromatic, 2CH), 128.9 (s, aromatic, 2CH), 128.7 (s, aromatic, 2CH), 128.4 (s, aromatic, CH), 128.0 (s, aromatic, 2CH), 77.4 (s, C-4), 53.7 (d,  $^2J_{CP}$  = 6.6 Hz, MeO), 53.5 (d,  $^2J_{CP}$  = 7.6 Hz, MeO), 50.3 (d,  $^1J_{CP}$  = 128.5 Hz, C-2), 43.0 (d,  $^2J_{CP}$  = 2.9 Hz, C-3).

$^{31}\text{P}$  NMR (162 MHz,  $\text{CDCl}_3$ , 298 K)  $\delta$  [ppm] 22.48.

IR (ATR)  $\nu$  [ $\text{cm}^{-1}$ ] 3063 (w), 2949 (w), 2853 (w), 1674 (s), 1597 (w), 1545 (s), 1449 (w), 1383 (w), 1250 (s), 1045 (s), 968 (m), 858 (w), 849 (w), 783 (m), 706 (m), 519 (m).

HRMS (APPI):  $m/z$   $[\text{M}+\text{H}]^+$  calcd for  $\text{C}_{18}\text{H}_{20}\text{NO}_6\text{P}\cdot\text{H}^+$ : 378.1101; found: 378.1101.

HPLC analysis (CHIRALPAK AD-3 column; hexane/2-propanol, 80:20; flow rate 1.0 mL/min; wavelength 230 nm):  $t_R$  = 9.7 (2*R*,3*S*), 22.3 (2*S*,3*R*) min.

**Dimethyl [(2*R*,3*S*)-1-(4-methoxyphenyl)-4-nitro-1-oxo-3-phenylbutan-2-yl]-phosphonate (6b).**

Yield: 1.51 g (46%), white crystals, m.p. 136–138 °C (toluene).

$[\alpha]_D^{20}$  -75.8 (c 1.0,  $\text{CHCl}_3$ ), 98% ee.

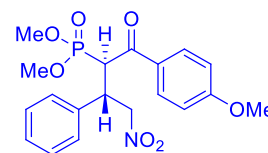

$^1\text{H}$  NMR (400 MHz,  $\text{CDCl}_3$ , 298 K)  $\delta$  [ppm] 7.79 (d,  $^3J_{HH}$  = 9.0 Hz, 2H, aromatic), 7.29–7.19 (m, 5H, aromatic), 6.87 (d,  $^3J_{HH}$  = 9.0 Hz, 2H, aromatic), 5.16–5.01 (m, 2H, H-4), 4.56 (dd,  $^2J_{HP}$  = 23.2 Hz,  $^3J_{HH}$  = 6.4 Hz, 1H, H-2), 4.39–4.31 (m, 1H, H-3), 3.84 (s, 3H, MeO), 3.58 (d,  $^3J_{HP}$  = 11.2 Hz, 3H, MeO), 3.55 (d,  $^3J_{HP}$  = 11.2 Hz, 3H, MeO).

$^{13}\text{C}$  NMR (101 MHz,  $\text{CDCl}_3$ , 298 K)  $\delta$  [ppm] 193.5 (d,  $^2J_{CP}$  = 4.8 Hz, C-1), 164.4 (s, aromatic, C), 137.6 (d,  $^3J_{CP}$  = 10.5 Hz, aromatic, C), 131.3 (s, aromatic, 2CH), 130.3 (d,  $^3J_{CP}$  = 1.9 Hz, aromatic, C), 129.1 (s, aromatic, 2CH), 128.3 (s, aromatic, CH), 128.0 (s, aromatic, 2CH), 114.1 (s, aromatic, 2CH), 77.3 (s, C-4), 55.7 (s, MeO), 53.7 (d,  $^2J_{CP}$  = 6.7 Hz, MeO), 53.5 (d,  $^2J_{CP}$  = 5.7 Hz, MeO), 49.9 (d,  $^1J_{CP}$  = 129.4 Hz, C-2); 43.0 (d,  $^2J_{CP}$  = 3.8 Hz, C-3).

$^{31}\text{P}$  NMR (162 MHz,  $\text{CDCl}_3$ , 298 K)  $\delta$  [ppm] 23.87.



IR (ATR)  $\nu$  [ $\text{cm}^{-1}$ ] 3063 (w), 3008 (w), 2955 (w), 2843 (w), 1667 (vs), 1597 (vs), 1551 (vs), 1516 (m), 1458 (m), 1435 (m), 1381 (m), 1334 (m), 1311 (m), 1269 (vs), 1242 (vs), 1172 (vs), 1061 (vs), 1018 (vs), 972 (m), 837 (m), 818 (m), 702 (m).

HRMS (APPI):  $m/z$   $[\text{M}+\text{H}]^+$  calcd for  $\text{C}_{19}\text{H}_{22}\text{NO}_7\text{P}\cdot\text{H}^+$ : 408.1207; found: 408.1212.

HPLC analysis (CHIRALPAK AD-3R column; water/acetonitrile, gradient: 0.1 min 30% acetonitrile to 50 min 100% acetonitrile; flow rate 0.2 mL/min; wavelength 230 nm):  $t_R$  = 13.3 (2*R*,3*S*), 16.3 (2*S*,3*R*) min.

**Dimethyl [(2*R*,3*S*)-1-(3-methoxyphenyl)-4-nitro-1-oxo-3-phenylbutan-2-yl]phosphonate (6c).**

Yield: 1.49 g (45%), white crystals, m.p. 120–121 °C (EtOH).

$[\alpha]_D^{20}$  -54.6 (c 1.0,  $\text{CHCl}_3$ ), dr 14:1, >99% ee.

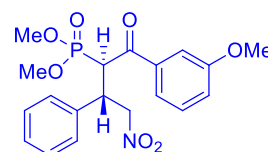

$^1\text{H}$  NMR (400 MHz,  $\text{CDCl}_3$ , 298 K)  $\delta$  [ppm] 7.32-7.20 (m, 8H, aromatic), 7.09-7.05 (m, 1H, aromatic), 5.14-5.00 (m, 2H, H-4), 4.58 (dd,  $^2J_{\text{HP}}$  = 23.2 Hz,  $^3J_{\text{HH}}$  = 6.8 Hz, 1H, H-2), 4.44-4.32 (m, 1H, H-3), 3.79 (s, 3H, MeO), 3.57 (d,  $^3J_{\text{HP}}$  = 9.0 Hz, 3H, MeO), 3.54 (d,  $^3J_{\text{HP}}$  = 9.0 Hz, 3H, MeO).

$^{13}\text{C}$  NMR (101 MHz,  $\text{CDCl}_3$ , 298 K)  $\delta$  [ppm] 195.3 (d,  $^2J_{\text{CP}}$  = 4.7 Hz, C-1), 159.9 (s, aromatic), 138.7 (s, aromatic), 137.5 (d,  $^3J_{\text{CP}}$  = 10.6 Hz, aromatic), 129.8 (s, aromatic), 129.1 (s, aromatic), 128.4 (s, aromatic), 128.0 (s, aromatic), 121.4 (s, aromatic), 120.6 (s, aromatic), 112.8 (s, aromatic), 77.3 (s, C-4), 55.5 (s, MeO), 53.7 (d,  $^2J_{\text{CP}}$  = 7.2 Hz, MeO), 53.5 (d,  $^2J_{\text{CP}}$  = 7.2 Hz, MeO), 50.6 (d,  $^1J_{\text{CP}}$  = 128.5 Hz, C-2), 43.0 (d,  $^2J_{\text{CP}}$  = 2.8 Hz, C-3).

$^{31}\text{P}$  NMR (162 MHz,  $\text{CDCl}_3$ , 298 K)  $\delta$  [ppm] 22.47.

IR (ATR)  $\nu$  [ $\text{cm}^{-1}$ ] 3049 (w), 3022 (w), 2961 (w), 2839 (w), 1710 (m), 1670 (s), 1597 (m), 1549 (vs), 1454 (m), 1429 (m), 1381 (m), 1269 (s), 1250 (s), 1234 (s), 1217 (s), 1167 (s), 1057 (s), 1043 (vs), 1030 (vs), 1009 (vs), 878 (m), 851 (m), 826 (m), 795 (vs), 758 (s), 698 (vs), 679 (s), 638 (m), 553 (m), 513 (vs).



HRMS (APPI):  $m/z$   $[M+H]^+$  calcd for  $C_{19}H_{22}NO_7P \cdot H^+$ : 408.1207; found: 408.1213.

HPLC analysis (CHIRALPAK AD-3 column; hexane/2-propanol, 80:20; flow rate 1.2 mL/min; wavelength 210 nm):  $t_R$  = 11.7 (2*R*,3*S*), 22.3 (2*S*,3*R*) min.

For (2*R*,3*R*)-isomer:

Yield: 1.19 g (36%), white crystals, m.p. 124–125 °C (MeOH).

$[\alpha]_D^{20}$  +51.3 (c 1.0,  $CHCl_3$ ), dr 8:1, >99% ee.

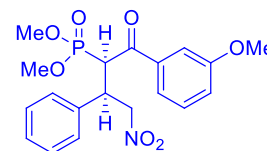

$^1H$  NMR (400 MHz,  $CDCl_3$ , 298 K)  $\delta$  [ppm] 7.31-6.99 (m, 9H, aromatic), 5.24 (dd,  $^2J_{HH}$  = 13.2 Hz,  $^3J_{HH}$  = 4.0 Hz, 1H, H-4), 4.92 (dd,  $^2J_{HH}$  = 12.8 Hz,  $^3J_{HH}$  = 10.4 Hz, 1H, H-4), 4.64 (dd,  $^2J_{HP}$  = 20.4 Hz,  $^3J_{HH}$  = 11.6 Hz, 1H, H-2), 4.44-4.36 (m, 1H, H-3), 3.82 (d,  $^3J_{HP}$  = 10.8 Hz, 3H, MeO), 3.76 (s, 3H, MeO), 3.72 (d,  $^3J_{HP}$  = 11.2 Hz, 3H, MeO).

$^{13}C$  NMR (101 MHz,  $CDCl_3$ , 298 K)  $\delta$  [ppm] 194.0 (d,  $^2J_{CP}$  = 5.8 Hz, C-1), 159.8 (s, aromatic, C(OMe)), 138.6 (s, aromatic, C), 136.9 (d,  $^3J_{CP}$  = 15.3 Hz, aromatic, C), 129.7 (s, aromatic, CH), 129.0 (s, aromatic, 2CH), 128.2 (s, aromatic, CH), 128.0 (s, aromatic, 2CH), 120.9 (s, aromatic, CH), 120.2 (s, aromatic, CH), 112.6 (s, aromatic, CH), 78.8 (s, C-4), 55.5 (s, MeO), 54.0 (d,  $^2J_{CP}$  = 6.7 Hz, MeO), 53.8 (d,  $^2J_{CP}$  = 7.6 Hz, MeO), 49.6 (d,  $^1J_{CP}$  = 125.5 Hz, C-2), 43.3 (d,  $^2J_{CP}$  = 3.9 Hz, C-3).

$^{31}P$  NMR (162 MHz,  $CDCl_3$ , 298 K)  $\delta$  [ppm] 22.62.

IR (ATR)  $\nu$  [ $cm^{-1}$ ] 3047 (w), 2960 (w), 1670 (vs), 1597 (vs), 1548 (vs), 1489 (s), 1454 (s), 1429 (s), 1381 (s), 1269 (s), 1234 (vs), 1217 (vs), 1029 (vs), 1008 (vs), 875 (s), 850 (s), 825 (s), 794 (vs), 758 (vs), 698 (vs), 677 (s).

HPLC analysis (CHIRALPAK AD-3 column; hexane/2-propanol, 80:20; flow rate 1.2 mL/min; wavelength 210 nm):  $t_R$  = 9.3 (2*S*,3*S*), 12.8 (2*R*,3*R*) min.

**Dimethyl [(2*S*,3*S*)-1-(2-methoxyphenyl)-4-nitro-1-oxo-3-phenylbutan-2-yl]phosphonate (6d).**

Yield: 1.65 g (50%), white crystals, m.p. 138–139 °C (MeOH).

$[\alpha]_D^{20}$  -88.7 (c 1.0,  $CHCl_3$ ), dr 1:-, 98% ee.

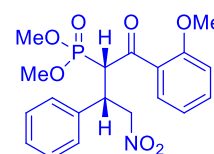



$^1\text{H}$  NMR (400 MHz,  $\text{CDCl}_3$ , 298 K)  $\delta$  [ppm] 7.40-7.33 (m, 2H, aromatic), 7.20-7.05 (m, 5H, aromatic), 6.92-6.80 (m, 2H, aromatic), 5.22 (dd,  $^2J_{\text{HH}} = 13.6$  Hz,  $^3J_{\text{HH}} = 4.4$  Hz, 1H, H-4), 5.18 (dd,  $^2J_{\text{HH}} = 21.6$  Hz,  $^3J_{\text{HH}} = 10.8$  Hz, 1H, H-4), 4.93 (dd,  $^2J_{\text{HP}} = 13.6$  Hz,  $^3J_{\text{HH}} = 10.8$  Hz, 1H, H-2), 4.41-4.32 (m, 1H, H-3), 3.92 (s, 3H, MeO), 3.79 (d,  $^3J_{\text{HP}} = 11.0$  Hz, 3H, MeO), 3.65 (d,  $^3J_{\text{HP}} = 11.0$  Hz, 3H, MeO).

$^{13}\text{C}$  NMR (101 MHz,  $\text{CDCl}_3$ , 298 K)  $\delta$  [ppm] 195.0 (d,  $^2J_{\text{CP}} = 5.7$  Hz, C-1), 158.1 (s, aromatic), 137.4 (d,  $^3J_{\text{CP}} = 14.3$  Hz, aromatic), 134.5 (s, aromatic), 131.3 (s, aromatic), 128.6 (s, aromatic), 128.3 (s, aromatic), 127.9 (s, aromatic), 127.6 (s, aromatic), 121.0 (s, aromatic), 111.7 (s, aromatic), 78.9 (s, C-4), 55.8 (d,  $^2J_{\text{CP}} = 2.9$  Hz, MeO), 53.6 (s), 53.4 (s), 53.3 (d,  $^1J_{\text{CP}} = 125.6$  Hz, C-2), 43.4 (d, C-3,  $^2J_{\text{CP}} = 3.8$  Hz, C-3).

$^{31}\text{P}$  NMR (162 MHz,  $\text{CDCl}_3$ , 298 K)  $\delta$  [ppm] 23.82.

IR (ATR)  $\nu$  [ $\text{cm}^{-1}$ ] 3050 (w), 3021 (w), 2959 (w), 2851 (w), 1674 (vs), 1597 (m), 1543 (vs), 1485 (m), 1443 (m), 1385 (m), 1323 (m), 1300 (m), 1242 (vs), 1196 (m), 1061 (s), 1026 (vs), 841 (w), 814 (m), 764 (s), 702 (m).

HRMS (APPI):  $m/z$  [ $\text{M}+\text{H}$ ] $^+$  calcd for  $\text{C}_{19}\text{H}_{22}\text{NO}_7\text{P}\cdot\text{H}^+$ : 408.1207; found: 408.1214.

HPLC analysis (CHIRALPAK AD-3 column; hexane/2-propanol, 85:15; flow rate 1.2 mL/min; wavelength 210 nm):  $t_R = 15.1$  (2*S*,3*S*), 17.5 (2*R*,3*R*) min.

### Dimethyl [(2*S*,3*R*)-1-nitro-4-oxo-2-phenylpentan-3-yl]phosphonate (6e).

Yield: 1.17 g (46%), white crystals, m.p. 130–132 °C (MeOH).

$[\alpha]_D^{20} +70.7$  (c 1.0,  $\text{CHCl}_3$ ), dr 11:1.

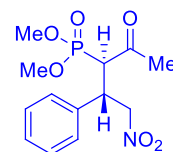

$^1\text{H}$  NMR (400 MHz,  $\text{CDCl}_3$ , 298 K)  $\delta$  [ppm] 7.32-7.19 (m, 5H, Ph) 5.02 (dd,  $^2J_{\text{HH}} = 13.4$  Hz,  $^3J_{\text{HH}} = 9.5$  Hz, 1H, H-1), 4.88 (dd,  $^2J_{\text{HH}} = 13.4$  Hz,  $^3J_{\text{HH}} = 3.4$  Hz, 1H, H-1), 4.12-4.05 (m, 1H, H-2), 3.85-3.75 (m, 1H, H-3), 3.59 (d,  $^3J_{\text{HP}} = 4.0$  Hz, 3H, MeO), 3.56 (d,  $^3J_{\text{HP}} = 4.0$  Hz, 3H, MeO), 2.23 (s, 3H, H-5).

$^{13}\text{C}$  NMR (101 MHz,  $\text{CDCl}_3$ , 298 K)  $\delta$  [ppm] 203.4 (d,  $^2J_{\text{CP}} = 3.8$  Hz, C-4), 137.4 (d,  $^3J_{\text{CP}} = 9.5$  Hz, Ph), 129.2 (s, Ph), 128.4 (s, Ph), 127.9 (s, Ph), 127.8 (s, Ph), 77.1 (d,  $^3J_{\text{CP}} =$



7.6 Hz, C-1), 55.7 (d,  $^1J_{CP}$  = 125.6 Hz, C-3), 53.9 (d,  $^2J_{CP}$  = 6.6 Hz, MeO), 53.1 (d,  $^2J_{CP}$  = 6.6 Hz, MeO), 42.2 (d,  $^2J_{CP}$  = 2.8 Hz, C-2), 33.1 (s, C-5).

$^{31}\text{P}$  NMR (162 MHz,  $\text{CDCl}_3$ , 298 K)  $\delta$  [ppm] 21.95.

IR (ATR)  $\nu$  [ $\text{cm}^{-1}$ ] 3050 (w), 3025 (w), 2959 (m), 2840 (w), 1713 (vs), 1547 (vs), 1458 (m), 1439 (m), 1381 (m), 1362 (m), 1250 (vs), 1181 (m), 1157 (m), 1038 (vs), 880 (m), 826 (s), 764 (m), 706 (s), 606 (s).

HRMS (APPI):  $m/z$   $[\text{M}+\text{H}]^+$  calcd for  $\text{C}_{13}\text{H}_{19}\text{NO}_6\text{P}\cdot\text{H}^+$  316.0945; found 316.0944.

**Dimethyl [(2S,3S)-1-(adamantan-1-yl)-4-nitro-1-oxo-3-phenylbutan-2-yl]phosphonate (6f) [2]**

Yield: 0.74 g (21%), white crystals, m.p. 179–180 °C (MeOH).

$[\alpha]_D^{20}$  -18.6 (c 1.0,  $\text{CHCl}_3$ ), dr 25:1, >99% ee.

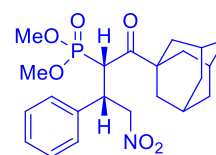

$^1\text{H}$  NMR (400 MHz,  $\text{CDCl}_3$ , 298 K)  $\delta$  [ppm] 7.32-7.16 (m, 5H, aromatic), 5.16 (dd,  $^2J_{HH}$  = 13.2 Hz,  $^3J_{HH}$  = 4.4 Hz, 1H, H-4), 4.85 (dd,  $^2J_{HH}$  = 13.2 Hz,  $^3J_{HH}$  = 11.6 Hz, 1H, H-4), 4.19-4.13 (m, 1H, H-3), 4.02 (dd,  $^2J_{HP}$  = 18.4 Hz,  $^3J_{HH}$  = 10.8 Hz, 1H, H-2), 3.82 (d,  $^3J_{HP}$  = 10.8 Hz, 3H, MeO), 3.79 (d,  $^3J_{HP}$  = 11.9 Hz, 3H, MeO), 1.84 (br s, 3H, Ad), 1.66-1.37 (m, 12H, Ad).

$^{13}\text{C}$  NMR (101 MHz,  $\text{CDCl}_3$ , 298 K)  $\delta$  [ppm] 209.7 (d,  $^2J_{CP}$  = 5.7 Hz, C-1), 137.3 (d,  $^3J_{CP}$  = 15.3 Hz, aromatic, C), 129.0 (s, aromatic, 2CH), 128.7 (s, aromatic, 2CH), 128.4 (s, aromatic, CH), 77.0 (s, C-4), 54.0 (d,  $^2J_{CP}$  = 6.7 Hz, MeO), 53.4 (d,  $^2J_{CP}$  = 6.7 Hz, MeO), 49.5 (d,  $^1J_{CP}$  = 124.5 Hz, C-2), 47.4 (s, C-3), 43.7 (d,  $^3J_{CP}$  = 4.7 Hz, C, Ad), 37.8 (s,  $\text{CH}_2$ , Ad), 36.2 (s,  $\text{CH}_2$ , Ad), 27.8 (s, CH, Ad).

$^{31}\text{P}$  NMR (162 MHz,  $\text{CDCl}_3$ , 298 K)  $\delta$  [ppm] 23.39.

IR (ATR)  $\nu$  [ $\text{cm}^{-1}$ ] 3032 (w), 2916 (vs), 2854 (s), 1689 (vs), 1546 (vs), 1496 (m), 1452 (s), 1381 (s), 1344 (m), 1307 (m), 1232 (vs), 1176 (s), 1058 (vs), 1016 (vs), 999 (vs), 867 (s), 821 (s), 812 (s), 775 (s), 759 (s), 744 (s), 702 (s), 555 (s), 528 (s).

HRMS (APPI):  $m/z$   $[\text{M}+\text{H}]^+$  calcd for  $\text{C}_{22}\text{H}_{30}\text{NO}_6\text{P}\cdot\text{H}^+$ : 436.1883; found: 436.1892.



HPLC analysis (CHIRALPAK AD-3 column; hexane/2-propanol, 90:10; flow rate 1.2 mL/min; wavelength 210 nm):  $t_R$  = 7.8 (2*S*,3*S*), 8.7 (2*R*,3*R*) min.

For (2*R*,3*S*)-isomer:

Yield: 176 mg (5%), white crystals, m.p. 91–93 °C (benzene).

$[\alpha]_D^{20}$  +12.2 (c 1.0, CHCl<sub>3</sub>), dr 30:1.

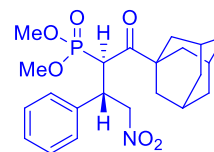

<sup>1</sup>H NMR (400 MHz, CDCl<sub>3</sub>, 298 K)  $\delta$  [ppm] 7.31-7.18 (m, 5H, aromatic), 5.05 (d, <sup>2</sup> $J_{HH}$  = 7.2 Hz, 2H, H-4), 4.23-4.17 (m, 1H, H-3), 4.15 (dd, <sup>2</sup> $J_{HP}$  = 28.4 Hz, <sup>3</sup> $J_{HH}$  = 6.4 Hz, 1H, H-2), 3.66 (d, <sup>3</sup> $J_{HP}$  = 11.2 Hz, 3H, MeO), 3.62 (d, <sup>3</sup> $J_{HP}$  = 11.2 Hz, 3H, MeO), 1.92 (br s, 3H, Ad), 1.65-1.52 (m, 12H, Ad).

<sup>13</sup>C NMR (101 MHz, CDCl<sub>3</sub>, 298 K)  $\delta$  [ppm] 211.2 (d, <sup>2</sup> $J_{CP}$  = 4.8 Hz, C-1), 137.5 (d, <sup>3</sup> $J_{CP}$  = 10.5 Hz, aromatic, C), 129.0 (s, aromatic, 2CH), 128.4 (s, aromatic, CH), 128.0 (s, aromatic, 2CH), 77.0 (s, C-4), 54.0 (d, <sup>2</sup> $J_{CP}$  = 6.7 Hz, MeO), 53.1 (d, <sup>2</sup> $J_{CP}$  = 7.6 Hz, MeO), 49.6 (d, <sup>1</sup> $J_{CP}$  = 126.5 Hz, C-2), 47.9 (s, C-3), 43.0 (d, <sup>3</sup> $J_{CP}$  = 3.8 Hz, C, Ad), 37.9 (s, CH<sub>2</sub>, Ad), 36.2 (s, CH<sub>2</sub>, Ad), 27.8 (s, CH, Ad).

<sup>31</sup>P NMR (162 MHz, CDCl<sub>3</sub>, 298 K)  $\delta$  [ppm] 22.78.

IR (ATR)  $\nu$  [cm<sup>-1</sup>] 3032 (w), 2904 (vs), 2852 (s), 1687 (vs), 1544 (vs), 1496 (m), 1452 (s), 1381 (s), 1342 (m), 1325 (m), 1249 (vs), 1211 (s), 1145 (m), 1056 (vs), 1016 (vs), 935 (m), 916 (m), 871 (s), 844 (s), 829 (s), 812 (s), 775 (s), 698 (s), 559 (s), 532 (s).

## 4. Synthesis of pyrrolidin-3-ylphosphonic acids

### The study of the hydrogenation of phosphonate **6a** under various conditions

A solution of phosphonate **6a** (2.65 mmol) in various solvents (MeOH, EtOH, iPrOH, THF, EtOAc, 9 mL) was transferred in a 100 mL steel autoclave under argon and 10% Pd/C (0.3 g) was added. Argon was replaced with hydrogen with 3 cycles of pressurization (10 bar)/depressurization. The reactor was finally charged with a



pressure of H<sub>2</sub> (30 bar), then left stirring with magnetic stirrer for 36 h at 25 °C. Then the reactor was depressurized. The reaction mixture was diluted by chloroform (30 mL), filtered and evaporated in vacuo. The components of the reaction mixture were separated by column liquid chromatography (eluent – chloroform/ethanol 0–5%) and analyzed by NMR <sup>1</sup>H, <sup>13</sup>C and <sup>31</sup>P spectroscopy.

**Dimethyl [(2*R*,3*R*,4*S*)-2,4-diphenylpyrrolidin-3-yl]phosphonate (7).**

<sup>1</sup>H NMR (400 MHz, CDCl<sub>3</sub>, 298 K) δ [ppm] 7.52-7.22 (m, 10H, Ph), 4.70 (dd, <sup>3</sup>J<sub>HH</sub> = 8.0 Hz, <sup>3</sup>J<sub>HP</sub> = 25.2 Hz, 1H, H-2), 3.85-3.72 (m, 1H, H-4, 1H, H-5), 3.27 (d, <sup>3</sup>J<sub>HP</sub> = 10.8 Hz, 3H, CH<sub>3</sub>O), 3.11-3.03 (m, 1H, H-5), 2.96 (d, <sup>3</sup>J<sub>HP</sub> = 10.4 Hz, 3H, CH<sub>3</sub>O), 2.88-2.80 (m, 1H, H-3).

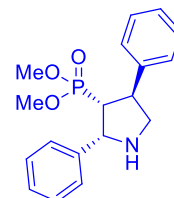

<sup>13</sup>C NMR (101 MHz, CDCl<sub>3</sub>, 298 K) δ [ppm] 142.6 (d, <sup>3</sup>J<sub>CP</sub> = 5.8 Hz, C, aromatic), 139.4 (d, <sup>3</sup>J<sub>CP</sub> = 5.7 Hz, C, aromatic), 128.8 (s, 2CH, aromatic), 128.1 (s, 2CH, aromatic), 128.0 (s, 2CH, aromatic), 127.6 (s, 2CH, aromatic), 127.5 (s, CH, aromatic), 127.0 (s, CH, aromatic), 65.4 (s, C-2), 56.2 (d, <sup>3</sup>J<sub>CP</sub> = 8.6 Hz, C-5), 51.88 (d, <sup>2</sup>J<sub>CP</sub> = 6.7 Hz, CH<sub>3</sub>O), 51.86 (d, <sup>2</sup>J<sub>CP</sub> = 7.6 Hz, CH<sub>3</sub>O), 50.1 (d, <sup>1</sup>J<sub>CP</sub> = 144.7 Hz, C-3), 47.8 (s, C-4).

<sup>31</sup>P NMR (162 MHz, CDCl<sub>3</sub>, 298 K) δ [ppm] 31.49.

**Dimethyl [(2*R*,3*R*,4*S*)-1-methyl-2,4-diphenylpyrrolidin-3-yl]phosphonate (8).**

<sup>1</sup>H NMR (400 MHz, DMSO-*d*<sub>6</sub>, 298 K) δ [ppm] 7.44-7.38 (m, 4H, aromatic), 7.31-7.27 (m, 4H, aromatic), 7.22-7.20 (m, 2H, aromatic), 3.77 (dd, <sup>3</sup>J<sub>HH</sub> = 10.0 Hz, <sup>3</sup>J<sub>HP</sub> = 24.0 Hz, 1H, H-2), 3.65-3.53 (m, 1H, H-4), 3.43-3.38 (m, 1H, H-5), 3.03 (d, <sup>3</sup>J<sub>HP</sub> = 10.8 Hz, 3H, MeO), 2.76 (d, <sup>3</sup>J<sub>HP</sub> = 10.8 Hz, 3H, MeO), 2.47-2.46 (m, 1H, H-5, 1H, H-3), 2.04 (s, 3H, Me).

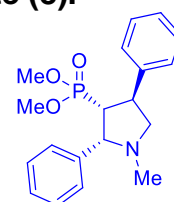

<sup>13</sup>C NMR (101 MHz, DMSO-*d*<sub>6</sub>, 298 K) δ [ppm] 142.6 (d, <sup>3</sup>J<sub>HP</sub> = 2.8 Hz, aromatic, C), 139.5 (d, <sup>3</sup>J<sub>HP</sub> = 6.6 Hz, aromatic, C), 130.0 (s, aromatic, 2CH), 128.8 (s, aromatic, 2CH), 128.5 (s, aromatic, 2CH), 127.9 (s, aromatic, 2CH), 127.7 (s, aromatic, CH), 127.2 (s, aromatic, CH), 72.2 (s, C-2), 65.7 (d, <sup>3</sup>J<sub>CP</sub> = 9.6 Hz, C-5), 51.8 (d, <sup>2</sup>J<sub>CP</sub> = 7.6



Hz, MeO), 51.7 (d,  $^2J_{CP}$  = 6.7 Hz, MeO), 48.4 (d,  $^1J_{CP}$  = 146.6 Hz, C-3), 45.0 (d,  $^2J_{CP}$  = 1.9 Hz, C-4), 40.3 (s, Me-N).

$^{31}\text{P}$  NMR (162 MHz, DMSO- $d_6$ , 298 K)  $\delta$  [ppm] 31.52.

IR (ATR)  $\nu$  [ $\text{cm}^{-1}$ ] 3062 (w), 3028 (w), 2947 (w), 2914 (w), 2850 (w), 2789 (w), 1494 (m), 1452 (m), 1253 (m), 1234 (s), 1215 (s), 1182 (m), 1147 (m), 1066 (vs), 1051 (vs), 1020 (vs), 997 (s), 914 (m), 842 (s), 817 (s), 777 (vs), 761 (s), 754 (s), 698 (vs), 690 (vs).

**Methyl hydrogen [(2*R*,3*R*,4*S*)-2,4-diphenylpyrrolidin-3-yl]phosphonate (9).**

$^1\text{H}$  NMR (400 MHz,  $\text{D}_2\text{O}$ , 298 K)  $\delta$  [ppm] 7.16-6.96 (m, 10H, aromatic), 4.98 (t,  $^3J_{HH}$  = 8.4 Hz,  $^3J_{HP}$  = 8.4 Hz, 1H, H-2), 3.80-3.71 (m, 2H, H-5), 3.23-3.16 (m, 1H, H-4), 3.03-2.93 (m, 1H, H-3), 2.74 (d,  $^3J_{HP}$  = 11.2 Hz, 3H, MeO).

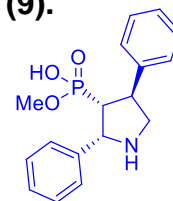

$^{13}\text{C}$  NMR (101 MHz,  $\text{D}_2\text{O}$ , 298 K)  $\delta$  [ppm] 136.8 (s, aromatic, C), 132.5 (d,  $^3J_{CP}$  = 3.8 Hz, aromatic, C), 129.6 (s, aromatic, CH), 129.0 (s, aromatic, CH), 129.0 (s, aromatic, 2CH), 128.7 (s, aromatic, 2CH), 128.1 (s, aromatic, 2CH), 127.7 (s, aromatic, 2CH), 64.2 (d,  $^2J_{CP}$  = 13.5 Hz, C-2), 51.8 (s, C-5), 51.8 (d,  $^2J_{CP}$  = 14.4 Hz, MeO), 47.0 (d,  $^1J_{CP}$  = 150.5 Hz, C-3), 44.4 (s, C-4).

$^{31}\text{P}$  NMR (162 MHz,  $\text{D}_2\text{O}$ , 298 K)  $\delta$  [ppm] 22.67.

IR (ATR)  $\nu$  [ $\text{cm}^{-1}$ ] 3412 (w), 3062 (w), 2968 (w), 1602 (m), 1587 (m), 1496 (m), 1456 (s), 1203 (vs), 1172 (vs), 1051 (vs), 756 (vs), 696 (vs).

**General procedure for the synthesis of 1-formylpyrrolidin-3-ylphosphonates (10a–d).**

A solution of phosphonate **6a–c, e** (2.65 mmol) in AcOH (9 mL) was transferred in a 100 mL steel autoclave under argon and 10% Pd/C (0.3 g) was added. Argon was replaced with hydrogen with 3 cycles of pressurization (10 bar)/depressurization. The reactor was finally charged with a pressure of  $\text{H}_2$  (30 bar), then left stirring with magnetic stirrer for 36 h at 25 °C. Then the reactor was depressurized. The reaction mixture was diluted by chloroform (30 mL), filtered and evaporated in vacuo. The residue was treated by



NaHCO<sub>3</sub> and water. The mixture was extracted with CH<sub>2</sub>Cl<sub>2</sub> (3 × 10 mL). The combined organic extracts were dried over Na<sub>2</sub>SO<sub>4</sub>, filtered, and evaporated in vacuo. Ethyl formate (16 mL) was added to a residue and the reaction mixture was refluxed for 3 h. The excess of ethyl formate was evaporated in vacuo. The crude product was purified by flash chromatography on silica gel and eluted with a mixture of chloroform/ethanol (0–5%) to give a mixture – a yellow oil. From this mixture, a product is precipitated in cyclohexane and recrystallized from CCl<sub>4</sub> to give a white solid.

**Dimethyl [(2*R*,3*R*,4*S*)-1-formyl-2,4-diphenylpyrrolidin-3-yl]phosphonate (10a).**

Mixture of rotamers 4.8:1. Yield: 0.50 g (52%), white crystals,

m.p. 126–129 °C (cyclohexane); [ $\alpha$ ]<sub>D</sub><sup>20</sup> +45.4 (c 1.0, CHCl<sub>3</sub>).

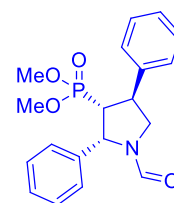

<sup>1</sup>H NMR (400 MHz, CDCl<sub>3</sub>, 298 K)  $\delta$  [ppm] 8.30 (s, 1H, CHO, minor rotamer), 8.15 (s, 1H, CHO, major rotamer), 7.40–7.24 (m, 10H, aromatic, major rotamer, 10H, aromatic, minor rotamer), 5.56 (dd, <sup>3</sup>J<sub>HH</sub> = 2.8 Hz, <sup>3</sup>J<sub>PH</sub> = 8.0 Hz, 1H, H-2, minor rotamer), 5.40 (dd, <sup>3</sup>J<sub>HH</sub> = 2.0 Hz, <sup>3</sup>J<sub>PH</sub> = 7.6 Hz, 1H, H-2, major rotamer), 4.37–4.32 (m, 1H, H-4, minor rotamer), 4.29–4.24 (m, 1H, H-4, major rotamer), 4.03–3.95 (m, 1H, H-5, minor rotamer), 3.90–3.80 (m, 1H, H-5, major rotamer), 3.79–3.67 (m, 1H, H-5, minor rotamer, 1H, H-5, major rotamer), 3.14 (d, <sup>3</sup>J<sub>HP</sub> = 11.2 Hz, 3H, MeO, minor rotamer), 3.13 (d, <sup>3</sup>J<sub>HP</sub> = 11.2 Hz, 3H, MeO, major rotamer), 3.10–3.02 (m, 1H, H-3, minor rotamer, 1H, H-3, major rotamer), 2.91 (d, <sup>3</sup>J<sub>HP</sub> = 10.8 Hz, 3H, MeO, minor rotamer), 2.90 (d, <sup>3</sup>J<sub>HP</sub> = 10.8 Hz, 3H, MeO, major rotamer).

<sup>13</sup>C NMR (101 MHz, CDCl<sub>3</sub>, 298 K)  $\delta$  [ppm] 161.6 (s, CHO, major rotamer), 160.3 (s, CHO, minor rotamer), 139.7 (d, <sup>3</sup>J<sub>CP</sub> = 2.8 Hz, aromatic, minor rotamer), 138.3 (s, aromatic, major rotamer), 128.9 (s, aromatic, minor rotamer), 128.8 (s, aromatic, major rotamer), 128.7 (s, aromatic, minor rotamer), 128.5 (s, aromatic, major rotamer), 128.4 (s, aromatic, major rotamer), 128.2 (s, aromatic, major rotamer), 128.1 (s, aromatic, minor rotamer), 128.0 (s, aromatic, minor rotamer), 127.9 (s, aromatic, minor rotamer),



127.9 (s, aromatic, major rotamer), 127.8 (s, aromatic, minor rotamer), 127.7 (s, aromatic, major rotamer), 62.8 (d,  $^2J_{CP} = 5.7$  Hz, C-2, major rotamer), 60.8 (d,  $^2J_{CP} = 4.7$  Hz, C-2, minor rotamer), 54.3 (d,  $^3J_{CP} = 14.4$  Hz, C-5, minor rotamer), 52.4 (d,  $^3J_{CP} = 14.4$  Hz, C-5, major rotamer), 52.2 (d,  $^2J_{CP} = 6.7$  Hz, MeO, minor rotamer, MeO, major rotamer), 51.6 (d,  $^2J_{CP} = 6.7$  Hz, MeO, minor rotamer, MeO, major rotamer), 49.4 (d,  $^1J_{CP} = 154.3$  Hz, C-3, major rotamer), 48.6 (d,  $^1J_{CP} = 155.3$  Hz, C-3, minor rotamer), 43.5 (s, C-4, minor rotamer), 42.8 (d,  $^2J_{CP} = 1.9$  Hz, C-4, major rotamer).

$^{31}\text{P}$  NMR (162 MHz,  $\text{CDCl}_3$ , 298 K)  $\delta$  [ppm] 26.02 (minor rotamer), 25.44 (major rotamer).

IR (ATR)  $\nu$  [ $\text{cm}^{-1}$ ] 3061 (w), 3032 (w), 2951 (w), 2920 (w), 2891 (w), 2852 (w), 1658 (vs), 1604 (m), 1494 (m), 1469 (m), 1454 (m), 1413 (m), 1388 (s), 1247 (vs), 1184 (s), 1041 (vs), 1020 (vs), 1006 (vs), 823 (vs), 781 (s), 734 (vs), 696 (vs), 671 (s), 569 (s), 524 (s), 426 (s).

HRMS (APPI):  $m/z$   $[\text{M}+\text{H}]^+$  calcd for  $\text{C}_{19}\text{H}_{22}\text{NO}_4\text{P}\cdot\text{H}^+$ , 360.1359, found 360.1361.

**Dimethyl [(2*R*,3*R*,4*S*)-1-formyl-2-(4-methoxyphenyl)-4-phenylpyrrolidin-3-yl]-phosphonate (10b).**

Mixture of rotamers 4.8:1. Yield: 0.52 g (50%), white crystals, m.p. 120–122 °C ( $\text{CCl}_4$ ).  $[\alpha]_D^{20} +47.5$  (c 1.0,  $\text{CHCl}_3$ ).

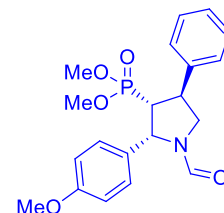

$^1\text{H}$  NMR (400 MHz,  $\text{CDCl}_3$ , 298 K)  $\delta$  [ppm] 8.28 (s, 1H, CHO, minor rotamer), 8.14 (s, 1H, CHO, major rotamer), 7.35-7.23 (m, 7H, aromatic, minor rotamer, 7H, aromatic, major rotamer), 6.91 (s, 1H, aromatic, major rotamer), 6.88 (s, 1H, aromatic, major rotamer, 1 H, aromatic, minor rotamer), 6.86 (s, 1H, aromatic, minor rotamer), 5.52 (dd,  $^3J_{HP} = 8.0$  Hz,  $^3J_{HH} = 2.5$  Hz, 1H, H-2, minor rotamer), 5.34 (dd,  $^3J_{HP} = 7.8$  Hz,  $^3J_{HH} = 1.8$  Hz, 1H, H-2 major rotamer), 4.34-4.29 (m, 1H, H-4, minor rotamer), 4.27-4.21 (m, 1H, H-4, major rotamer), 4.01-3.95 (m, 1H, H-5, minor rotamer), 3.86-3.81 (m, 1H, H-5, major rotamer, 1H, H-5, minor rotamer), 3.79 (s, 3H, MeO, major rotamer), 3.76 (s, 3H,



MeO, minor rotamer), 3.69-3.63 (m, 1H, H-5, major rotamer), 3.17 (d,  $^3J_{HP} = 10.9$  Hz, 3H, MeO, minor rotamer), 3.15 (d,  $^3J_{HP} = 10.9$  Hz, 3H, MeO, major rotamer), 3.08-2.98 (m, 1H, H-3, minor rotamer, 1H, H-3, major rotamer), 2.95 (d,  $^3J_{HP} = 10.7$  Hz, 3H, MeO, minor rotamer), 2.94 (d,  $^3J_{HP} = 10.7$  Hz, 3H, MeO, major rotamer).

$^{13}\text{C}$  NMR (101 MHz,  $\text{CDCl}_3$ , 298 K)  $\delta$  [ppm] 161.6 (s, CHO, major rotamer), 160.2 (s, CHO, minor rotamer), 159.7 (s, aromatic, major rotamer), 159.3 (s, aromatic, minor rotamer), 138.5 (s, aromatic, minor rotamer), 138.4 (s, aromatic, major rotamer), 131.8 (d,  $^3J_{CP} = 2.8$  Hz, aromatic, major rotamer), 130.7 (d,  $^3J_{CP} = 2.8$  Hz, aromatic, minor rotamer), 129.6 (s, aromatic, major rotamer), 129.4 (s, aromatic, minor rotamer), 128.9 (s, aromatic, minor rotamer), 128.8 (s, aromatic, major rotamer), 127.9 (s, aromatic, major rotamer), 127.78 (s, aromatic, minor rotamer), 127.75 (s, aromatic, minor rotamer, aromatic, major rotamer), 113.8 (s, aromatic, major rotamer), 113.6 (s, aromatic, minor rotamer), 62.3 (d,  $^2J_{CP} = 4.8$  Hz, C-2, major rotamer), 60.3 (d,  $^2J_{CP} = 4.8$  Hz, C-2, minor rotamer), 55.4 (s, MeO, major rotamer), 55.3 (s, MeO, minor rotamer), 54.2 (d,  $^3J_{CP} = 13.4$  Hz, C-5, minor rotamer), 52.3 (d,  $^2J_{CP} = 6.7$  Hz, MeO, minor rotamer, MeO, major rotamer), 52.2 (d,  $^3J_{CP} = 14.3$  Hz, C-5, major rotamer), 51.5 (d,  $^2J_{CP} = 6.7$  Hz, MeO, minor rotamer, MeO, major rotamer), 49.4 (d,  $^1J_{CP} = 155.3$  Hz, C-3, major rotamer), 48.7 (d,  $^1J_{CP} = 155.3$  Hz, C-3, minor rotamer), 43.6 (s, C-4, minor rotamer), 42.8 (s, C-4, major rotamer).

$^{31}\text{P}$  NMR (162 MHz,  $\text{CDCl}_3$ , 298 K)  $\delta$  [ppm] 25.76 (major rotamer), 26.30 (minor rotamer).

IR (ATR)  $\nu$  [ $\text{cm}^{-1}$ ] 3066 (w), 3001 (w), 2949 (w), 2843 (w), 1654 (vs), 1612 (m), 1512 (s), 1382 (s), 1244 (vs), 1176 (s), 1043 (vs), 1022 (vs), 821 (s), 781 (s), 756 (vs), 702 (s), 661 (m), 569 (s), 532 (s).

HRMS (APPI):  $m/z$   $[\text{M}+\text{H}]^+$  calcd for  $\text{C}_{20}\text{H}_{24}\text{NO}_5\text{P}\cdot\text{H}^+$ , 390.1464, found 390.1463.



**Dimethyl [(2*R*,3*R*,4*S*)-1-formyl-2-(3-methoxyphenyl)-4-phenylpyrrolidin-3-yl]-phosphonate (10c).**

Mixture of rotamers 4.1:1. Yield: 0.49 g (48%), white crystals, m.p. 158–159 °C (CCl<sub>4</sub>).

$[\alpha]_D^{20} +41.9$  (c 1.0, CHCl<sub>3</sub>).

<sup>1</sup>H NMR (400 MHz, CDCl<sub>3</sub>, 298 K)  $\delta$  [ppm] 8.29 (s, 1H, CHO, minor rotamer), 8.15 (s, 1H, CHO, major rotamer), 7.29-7.26 (m, 6H, aromatic, minor rotamer, 6H, aromatic, major rotamer), 6.96-6.92 (m, 2H, aromatic, minor rotamer, 2H, aromatic, major rotamer), 6.85-6.78 (m, 1H, aromatic, minor rotamer, 1H, aromatic, major rotamer), 5.54 (d, <sup>3</sup>J<sub>HP</sub> = 8.0 Hz, 1H, H-2, minor rotamer), 5.36 (d, <sup>3</sup>J<sub>HP</sub> = 7.5 Hz, 1H, H-2, major rotamer), 4.31 (t, <sup>3</sup>J<sub>HH</sub> = 10.0 Hz, 1H, H-4, minor rotamer), 4.23 (t, <sup>3</sup>J<sub>HH</sub> = 11.1 Hz, 1H, H-4, major rotamer), 3.98-3.91 (m, 1H, H-5, minor rotamer), 3.87-3.75 (m, 1H, H-5, minor rotamer, 1H, H-5, major rotamer), 3.71-3.65 (m, 1H, H-5, major rotamer), 3.81 (s, 3H, MeO, major rotamer), 3.79 (s, 3H, MeO, minor rotamer), 3.14 (d, <sup>3</sup>J<sub>HP</sub> = 11.2 Hz, 3H, MeO, minor rotamer), 3.13 (d, <sup>3</sup>J<sub>HP</sub> = 10.9 Hz, 3H, MeO, major rotamer), 3.09-2.98 (m, 1H, H-3, minor rotamer, 1H, H-3, major rotamer), 2.95 (d, <sup>3</sup>J<sub>HP</sub> = 10.7 Hz, 3H, MeO, minor rotamer), 2.94 (d, <sup>3</sup>J<sub>HP</sub> = 10.9 Hz, 3H, MeO, major rotamer).

<sup>13</sup>C NMR (101 MHz, CDCl<sub>3</sub>, 298 K)  $\delta$  [ppm] 161.6 (s, CHO, major rotamer), 160.3 (s, CHO, minor rotamer), 159.6 (s, aromatic, major rotamer), 159.4 (s, aromatic, minor rotamer), 141.2 (d, <sup>3</sup>J<sub>CP</sub> = 3.8 Hz, aromatic, major rotamer), 140.0 (d, <sup>3</sup>J<sub>CP</sub> = 3.8 Hz, aromatic, minor rotamer), 138.4 (s, aromatic), 129.5 (s, aromatic, major rotamer), 129.2 (s, aromatic, minor rotamer), 128.9 (s, aromatic, minor rotamer), 128.8 (s, aromatic, major rotamer), 127.9 (s, aromatic, major rotamer), 127.79 (s, aromatic, minor rotamer), 127.76 (s, aromatic), 120.5 (s, aromatic, major rotamer), 120.3 (s, aromatic, minor rotamer), 114.5 (s, aromatic, major rotamer), 114.3 (s, aromatic, minor rotamer), 113.7 (s, aromatic, major rotamer), 113.3 (s, aromatic, minor rotamer), 62.7 (d, <sup>2</sup>J<sub>CP</sub> = 5.7 Hz,

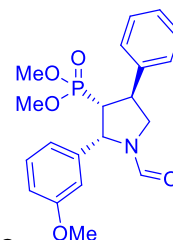



C-2, major rotamer), 60.6 (d,  $^2J_{CP}$  = 4.8 Hz, C-2, minor rotamer), 55.4 (s, MeO, major rotamer), 55.3 (s, MeO, minor rotamer), 54.2 (d,  $^3J_{CP}$  = 14.3 Hz, C-5, minor rotamer), 52.3 (d,  $^3J_{CP}$  = 14.3 Hz, C-5, major rotamer), 52.2 (d,  $^2J_{CP}$  = 6.7 Hz, MeO, minor rotamer, MeO, major rotamer), 51.6 (d,  $^2J_{CP}$  = 6.7 Hz, MeO, minor and major rotamer), 49.4 (d,  $^1J_{CP}$  = 154.3 Hz, C-3, major rotamer), 48.6 (d,  $^1J_{CP}$  = 155.2 Hz, C-3, minor rotamer), 43.5 (s, C-4, minor rotamer), 42.9 (s, C-4, major rotamer).

$^{31}\text{P}$  NMR (162 MHz,  $\text{CDCl}_3$ , 298 K)  $\delta$  [ppm] 25.50 (major rotamer), 25.97 (minor rotamer).

IR (ATR)  $\nu$  [ $\text{cm}^{-1}$ ] 3055 (w), 3012 (w), 2953 (w), 2908 (w), 1654 (vs), 1600 (m), 1463 (m), 1386 (s), 1246 (vs), 1043 (vs), 1024 (vs), 817 (vs), 792 (vs), 754 (vs), 721 (vs), 700 (vs), 570 (s), 524 (vs).

HRMS (APPI):  $m/z$   $[\text{M}+\text{H}]^+$  calcd for  $\text{C}_{20}\text{H}_{24}\text{NO}_5\text{P}\cdot\text{H}^+$ , 390.1464, found 390.1464.

#### Dimethyl [(2*R*,3*R*,4*S*)-1-formyl-2-methyl-4-phenylpyrrolidin-3-yl]phosphonate

##### (10d).

Mixture of rotamers 2.1:1. Yield: 0.39 g (49%), white crystals,

m.p. 79–80 °C.  $[\alpha]_D^{20}$  +5.8 (c 1.0,  $\text{CHCl}_3$ ).

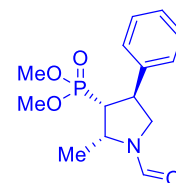

$^1\text{H}$  NMR (400 MHz,  $\text{CDCl}_3$ , 298 K)  $\delta$  [ppm] 8.26 (s, 1H, CHO, major rotamer), 8.16 (s, 1H, CHO, minor rotamer), 7.34-7.21 (m, 5H, aromatic, minor rotamer, 5H, aromatic, major rotamer), 4.67-4.60 (m, 1H, H-2, minor rotamer), 4.40-4.33 (m, 1H, H-2, major rotamer), 4.03-3.98 (m, 1H, H-4, minor rotamer), 3.92-3.86 (m, 1H, H-4, major rotamer), 3.85-3.69 (m, 1H, H-5, minor rotamer, 1H, H-5, major rotamer), 3.55-3.48 (m, 1H, H-5, minor rotamer, 1H, H-5, major rotamer), 3.54 (d,  $^3J_{HP}$  = 10.9 Hz, 3H, MeO, minor rotamer), 3.49 (d,  $^3J_{HP}$  = 10.9 Hz, 3H, MeO, major rotamer), 3.20 (d,  $^3J_{HP}$  = 10.7 Hz, 3H, MeO, major rotamer), 3.15 (d,  $^3J_{HP}$  = 10.9 Hz, 3H, MeO, minor rotamer), 2.76-2.65 (m, 1H, H-3, minor rotamer, 1H, H-3, major rotamer), 1.45 (d,  $^3J_{HH}$  = 6.6 Hz, 3H, Me, major rotamer), 1.42 (d,  $^3J_{HH}$  = 6.6 Hz, 3H, Me, minor rotamer).



$^{13}\text{C}$  NMR (101 MHz,  $\text{CDCl}_3$ , 298 K)  $\delta$  [ppm] 160.2 (s, CHO, minor rotamer), 160.1 (s, CHO, major rotamer), 138.8 (s, aromatic, major rotamer), 138.6 (s, aromatic, minor rotamer), 129.0 (s, aromatic, minor rotamer), 128.9 (s, aromatic, major rotamer), 127.9 (s, aromatic, minor rotamer, aromatic, major rotamer), 127.8 (s, aromatic, minor rotamer, aromatic, major rotamer), 55.3 (d,  $^2J_{\text{CP}} = 4.7$  Hz, C-2, major rotamer), 53.1 (d,  $^2J_{\text{CP}} = 2.8$  Hz, C-2, minor rotamer), 52.5 (d,  $^2J_{\text{CP}} = 6.7$  Hz, MeO, major rotamer), 52.4 (d,  $^2J_{\text{CP}} = 6.7$  Hz, MeO, minor rotamer), 51.79 (d,  $^2J_{\text{CP}} = 6.7$  Hz, MeO, major rotamer), 51.77 (d,  $^2J_{\text{CP}} = 6.7$  Hz, MeO, minor rotamer), 50.9 (d,  $^3J_{\text{CP}} = 14.3$  Hz, C-5, major rotamer, C-5, minor rotamer), 47.3 (d,  $^1J_{\text{CP}} = 151.4$  Hz, C-3, major rotamer), 46.6 (d,  $^1J_{\text{CP}} = 151.4$  Hz, C-3, minor rotamer), 43.1 (s, C-4, minor rotamer), 42.6 (s, C-4, major rotamer), 20.4 (d,  $^3J_{\text{CP}} = 1.9$  Hz, Me, major rotamer), 16.5 (d,  $^3J_{\text{CP}} = 2.8$  Hz, Me, minor rotamer).

$^{31}\text{P}$  NMR (162 MHz,  $\text{CDCl}_3$ , 298 K)  $\delta$  [ppm] 28.03 (major rotamer), 28.44 (minor rotamer).

IR (ATR)  $\nu$  [ $\text{cm}^{-1}$ ] 3061 (w), 2989 (w), 2953 (w), 2881 (w), 2852 (w), 1662 (vs), 1606 (m), 1498 (m), 1467 (m), 1456 (m), 1413 (m), 1381 (s), 1232 (vs), 1182 (s), 1022 (vs), 1002 (vs), 821 (vs), 781 (s), 748 (vs), 702 (vs), 650 (m), 596 (s), 565 (s), 526 (vs).

HRMS (APPI):  $m/z$   $[\text{M}+\text{H}]^+$  calcd for  $\text{C}_{14}\text{H}_{20}\text{NO}_4\text{P}\cdot\text{H}^+$ , 298.1202, found 298.1201.

### General procedure for the synthesis of pyrrolidin-3-ylphosphonic acids (**11a–d**)

The mixture of 1-formylpyrrolidin-3-ylphosphonate **10a–d** (1.30 mmol) and 5% hydrochloric acid (5 mL) was refluxed for 33 h and resulting colorless solution was evaporated at reduced pressure. The residue was dried in vacuo to a constant weight.

#### (**2R,3R,4S**)-2,4-Diphenylpyrrolidin-3-ylphosphonic acid hydrochloride (**11a**).

Yield: 398 mg (90%), white crystals, m.p. 179–180 °C (decomp.).

$[\alpha]_D^{20} +81.0$  (c 1.0,  $\text{H}_2\text{O}$ ).

$^1\text{H}$  NMR (400 MHz,  $\text{D}_2\text{O}$ , 298 K)  $\delta$  [ppm] 7.54–7.27 (m, 10H, aromatic),

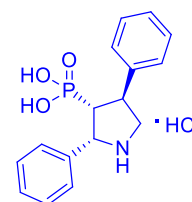



5.22 (dd,  $^3J_{\text{HH}}$  8.4 Hz,  $^3J_{\text{HP}}$  16.8 Hz, 1H, H-2), 4.21-4.04 (m, 1H, H-5, 1H, H-4), 3.53-3.48 (m, 1H, H-5), 3.12-3.04 (m, 1H, H-3).

$^{13}\text{C}$  NMR (101 MHz,  $\text{D}_2\text{O}$ , 298 K)  $\delta$  [ppm] 138.6 (d,  $^3J_{\text{CP}}$  1.9 Hz, aromatic, C), 133.2 (d,  $^3J_{\text{CP}}$  3.8 Hz, aromatic, C), 129.4 (s, aromatic, CH), 129.1 (s, aromatic, 2CH), 128.8 (s, aromatic, 2CH), 128.2 (s, aromatic, 2CH), 128.0 (s, aromatic, CH), 127.8 (s, aromatic, 2CH), 64.9 (d,  $^2J_{\text{CP}}$  1.9 Hz, C-2), 51.8 (d,  $^3J_{\text{CP}}$  12.4 Hz, C-5), 48.9 (d,  $^1J_{\text{CP}}$  143.8 Hz, C-3), 44.7 (s, C-4).

$^{31}\text{P}$  NMR (162 MHz,  $\text{D}_2\text{O}$ , 298 K)  $\delta$  [ppm] 17.01.

IR (ATR)  $\nu$  [ $\text{cm}^{-1}$ ] 2891 (s), 2727 (s), 1602 (m), 1496 (m), 1456 (m), 1159 (s), 983 (s), 916 (s), 756 (s), 694 (s).

HRMS (APPI):  $m/z$   $[\text{M}-\text{Cl}]^+$  calcd for  $\text{C}_{16}\text{H}_{19}\text{ClNO}_3\text{P}\cdot\text{H}^+$ , 304.1097, found 304.1099.

**(2R,3R,4S)-2-(4-methoxyphenyl)-4-phenylpyrrolidin-3-ylphosphonic acid**

**hydrochloride (11b).**

Yield: 356 mg (74%), white crystals, m.p. 205–208 °C (decomp.).

$[\alpha]_{\text{D}}^{20} +75.1$  (c 1.0,  $\text{H}_2\text{O}$ ).

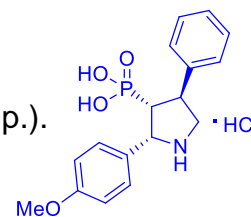

$^1\text{H}$  NMR (400 MHz,  $\text{DMSO}-d_6$ , 298 K)  $\delta$  [ppm] 11.00 (br s, 1H, NH), 9.02 (br s., 1H, OH), 7.48-7.46 (m, 2H, aromatic), 7.43-7.41 (m, 2H, aromatic), 7.32-7.29 (m, 2H, aromatic), 7.24-7.20 (m, 1H, aromatic), 6.89-6.87 (m, 2H, aromatic), 5.07-4.97 (m, 1H, H-2), 4.03-3.90 (m, 1H, H-5, 1H, H-4), 3.73 (s, 3H, MeO), 3.36-3.21 (br s, 1H, H-5), 2.95-2.86 (m, 1H, H-3).

$^{13}\text{C}$  NMR (101 MHz,  $\text{DMSO}-d_6$ , 298 K)  $\delta$  [ppm] 159.7 (s, aromatic,  $\text{C}(\text{OMe})$ ), 141.0 (d,  $^3J_{\text{CP}}$  = 2.8 Hz, aromatic, C), 130.8 (s, aromatic, 2CH), 129.0 (s, aromatic, 2CH), 128.6 (s, aromatic, 2CH), 127.6 (s, aromatic, CH), 126.4 (d,  $^3J_{\text{CP}}$  = 2.8 Hz, aromatic, C), 113.8 (s, aromatic, 2CH), 64.0 (s, C-2), 55.7 (s, MeO), 51.4 (d,  $^3J_{\text{CP}}$  = 10.5 Hz, C-5), 49.2 (d,  $^1J_{\text{CP}}$  = 144.7 Hz, C-3), 44.5 (s, C-4).

$^{31}\text{P}$  NMR (162 MHz,  $\text{DMSO}-d_6$ , 298 K)  $\delta$  [ppm] 18.81.



IR (ATR)  $\nu$  [cm<sup>-1</sup>] 2899 (s), 2723 (s), 1612 (m), 1585 (m), 1517 (s), 1496 (m), 1456 (m), 1253 (s), 1182 (s), 989 (s), 923 (s), 827 (s), 700 (s), 520 (s).

HRMS (APPI):  $m/z$  [M-Cl]<sup>+</sup> calcd for C<sub>17</sub>H<sub>21</sub>ClNO<sub>4</sub>P-HCl·H<sup>+</sup>, 334.1202, found 334.1204.

**(2*R*,3*R*,4*S*)-2-(3-methoxyphenyl)-4-phenylpyrrolidin-3-ylphosphonic acid**

**hydrochloride (11c).**

Yield: 481 mg (90%), white crystals, m.p. 172–173 °C (decomp.).

$[\alpha]_D^{20}$  +70.1 (c 1.0, H<sub>2</sub>O).

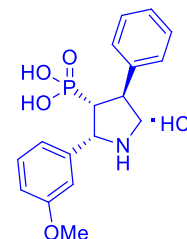

<sup>1</sup>H NMR (400 MHz, DMSO-*d*<sup>6</sup>, 298 K)  $\delta$  [ppm] 11.09 (br s, 1H, NH), 9.08 (br s., 1H, OH), 7.49-7.47 (m, 2H, aromatic), 7.33-7.21 (m, 4H, aromatic), 7.09-7.04 (m, 2H, aromatic), 6.89-6.86 (m, 1H, aromatic), 5.06-5.01 (m, 1H, H-2), 4.00-3.95 (m, 1H, H-5, 1H, H-4), 3.74 (s, 3H, MeO), 3.30 (br s, 1H, H-5), 2.98-2.90 (m, 1H, H-3).

<sup>13</sup>C NMR (101 MHz, DMSO-*d*<sup>6</sup>, 298 K)  $\delta$  [ppm] 159.2 (s, aromatic, C(OMe)), 141.1 (d, <sup>3</sup>*J*<sub>CP</sub> = 3.8 Hz, aromatic, C), 135.6 (d, <sup>3</sup>*J*<sub>CP</sub> = 3.8 Hz, aromatic, C), 129.6 (s, aromatic, CH), 129.0 (s, aromatic, 2CH), 128.5 (s, aromatic, 2CH), 127.6 (s, aromatic, CH), 121.3 (s, aromatic, CH), 115.3 (s, aromatic, CH), 114.3 (s, aromatic, CH), 64.1 (d, <sup>2</sup>*J*<sub>CP</sub> = 6.7 Hz, C-2), 55.6 (s, MeO), 51.4 (d, <sup>3</sup>*J*<sub>CP</sub> = 9.6 Hz, C-5), 49.1 (d, <sup>1</sup>*J*<sub>CP</sub> = 144.7 Hz, C-3), 44.5 (s, C-4).

<sup>31</sup>P NMR (162 MHz, DMSO-*d*<sup>6</sup>, 298 K)  $\delta$  [ppm] 18.89.

IR (ATR)  $\nu$  [cm<sup>-1</sup>] 3045 (s), 2139 (s), 1602 (m), 1587 (m), 1496 (m), 1456 (m), 1261 (m), 1201 (m), 1159 (s), 987 (vs), 925 (s), 779 (m), 758 (m), 696 (vs), 530 (m).

HRMS (APPI):  $m/z$  [M-Cl]<sup>+</sup> calcd for C<sub>17</sub>H<sub>21</sub>ClNO<sub>4</sub>P-HCl·H<sup>+</sup>, 334.1202, found 334.1204.

**(2*R*,3*R*,4*S*)-2-methyl-4-phenylpyrrolidin-3-ylphosphonic acid hydrochloride (11d).**

Yield: 339 mg (94%), white crystals, m.p. 214–215 °C (decomp.).

$[\alpha]_D^{20}$  +64.3 (c 1.0, H<sub>2</sub>O).

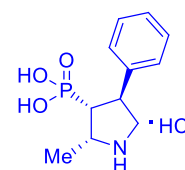



$^1\text{H}$  NMR (400 MHz,  $\text{D}_2\text{O}$ , 298 K)  $\delta$  [ppm] 7.27-7.21 (m, 5H, aromatic), 4.17-4.12 (m, 1H, H-2), 3.81-3.64 (m, 1H, H-5, 1H, H-4), 3.19-3.13 (m, 1H, H-5), 2.62-2.54 (m, 1H, H-3), 1.43 (d,  $^3J_{\text{HH}} = 6.4$  Hz, 3H, Me).

$^{13}\text{C}$  NMR (101 MHz,  $\text{D}_2\text{O}$ , 298 K)  $\delta$  [ppm] 139.4 (s, aromatic, C), 129.0 (s, aromatic, 2CH), 127.8 (s, aromatic, 2CH), 127.6 (s, aromatic, CH), 57.9 (s,  $^2J_{\text{CP}} = 3.8$  Hz, C-2), 51.0 (d,  $^3J_{\text{CP}} = 12.4$  Hz, C-5), 48.0 (d,  $^1J_{\text{CP}} = 139.9$  Hz, C-3), 44.1 (s, C-4), 14.8 (d,  $^3J_{\text{CP}} = 2.8$  Hz, Me).

$^{31}\text{P}$  NMR (162 MHz,  $\text{D}_2\text{O}$ , 298 K)  $\delta$  [ppm] 16.35.

IR (ATR)  $\nu$  [ $\text{cm}^{-1}$ ] 2964 (s), 2750 (s), 1544 (m), 1494 (m), 1460 (m), 1361 (m), 1274 (m), 1190 (vs), 1130 (s), 1062 (vs), 1026 (vs), 1012 (vs), 950 (vs), 771 (s), 756 (s), 702 (vs), 673 (s), 557 (vs), 495 (vs).

HRMS (APPI):  $m/z$   $[\text{M}-\text{Cl}]^+$  calcd for  $\text{C}_{11}\text{H}_{17}\text{ClNO}_3\text{P}-\text{HCl}\cdot\text{H}^+$ , 242.0940, found 242.0934.

## 5. Synthesis of tetrahydro-2*H*-pyran-3-ylphosphonates

### General procedure for the synthesis of tetrahydro-2*H*-pyran-3-ylphosphonates

#### 13a–f

The aldehyde **12a–f** (15.9 mmol),  $\text{K}_2\text{CO}_3$  (219 mg, 1.59 mmol), benzyltriethylammonium chloride (36 mg, 0.16 mmol) and water (2 mL) were added successively to a solution of phosphonate **6e** (0.50 g, 1.59 mmol) in THF (15 mL). The resulting mixture was stirred for 72 h at rt. Then, the mixture was extracted with  $\text{CH}_2\text{Cl}_2$  (3  $\times$  10 mL). The combined extracts were dried ( $\text{Na}_2\text{SO}_4$ ) and evaporated at reduced pressure. Purification by column chromatography on silica gel, eluting with  $\text{CHCl}_3/\text{MeOH}$  (98:2), followed by recrystallization from methanol gave the desired compounds **13a–f**.



Dimethyl

**[(2*S*,3*R*,4*S*,5*S*,6*R*)-6-ethyl-2-hydroxy-2-methyl-5-nitro-4-phenyltetrahydro-2*H*-pyran-3-yl]phosphonate (13a).**

Yield: 206 mg (34%), white crystals, m.p. 173–174 °C (methanol).

$[\alpha]_D^{20} +42.4$  (c 1.0, CHCl<sub>3</sub>). *dr* 1:-.

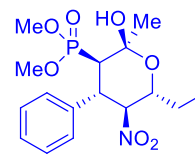

<sup>1</sup>H NMR (400 MHz, CDCl<sub>3</sub>, 298 K)  $\delta$  [ppm] 7.29-7.16 (m, 5H, aromatic), 4.47 (td, <sup>3</sup>*J*<sub>HH</sub> = 10.8 Hz, <sup>4</sup>*J*<sub>HP</sub> = 0.8 Hz, 1H, H-5), 4.38-4.33 (m, 1H, H-6), 3.91 (s, 1H, OH), 3.93 (td, <sup>3</sup>*J*<sub>HH</sub> = 12.0 Hz, <sup>3</sup>*J*<sub>HP</sub> = 8.9 Hz, 1H, H-4), 3.56 (d, <sup>3</sup>*J*<sub>HP</sub> = 10.8 Hz, 3H, MeO), 3.19 (d, <sup>3</sup>*J*<sub>HP</sub> = 11.1 Hz, 3H, MeO), 2.50 (ddd, <sup>2</sup>*J*<sub>HP</sub> = 18.4, <sup>3</sup>*J*<sub>HH</sub> = 12.4 Hz, <sup>4</sup>*J*<sub>HH</sub> = 1.2 Hz, 1H, H-3), 1.82 (s, 3H, Me), 1.59-1.41 (m, 2H, CH<sub>2</sub>), 0.95 (t, <sup>3</sup>*J*<sub>HH</sub> = 7.6 Hz, 3H, MeCH<sub>2</sub>).

<sup>13</sup>C NMR (101 MHz, CDCl<sub>3</sub>, 298 K)  $\delta$  [ppm] 137.2 (s, aromatic), 128.6 (s, aromatic), 128.4 (s, aromatic), 128.0 (s, aromatic), 95.9 (s, C-2), 92.8 (d, <sup>3</sup>*J*<sub>CP</sub> = 14.3 Hz, C-5), 70.5 (s, C-6), 53.5 (d, <sup>2</sup>*J*<sub>CP</sub> = 6.7 Hz, MeO), 51.6 (d, <sup>2</sup>*J*<sub>CP</sub> = 6.7 Hz, MeO), 48.4 (d, <sup>1</sup>*J*<sub>CP</sub> = 138.9 Hz, C-3), 44.3 (s, C-4), 29.4 (s, Me), 24.8 (s, CH<sub>2</sub>), 8.9 (s, Me).

<sup>31</sup>P NMR (162 MHz, CDCl<sub>3</sub>, 298 K)  $\delta$  [ppm] 27.29.

IR (ATR)  $\nu$  [cm<sup>-1</sup>] 3267 (m), 2962 (w), 2926 (w), 2856 (w), 1550 (vs), 1377 (m), 1240 (vs), 1028 (vs), 813 (s), 702 (s), 520 (s).

HRMS (APPI): *m/z* [M-H<sub>2</sub>O+H]<sup>+</sup> calcd for C<sub>16</sub>H<sub>24</sub>NO<sub>7</sub>P-H<sub>2</sub>O·H<sup>+</sup> 356.1257; found 356.1258.

**Dimethyl [(2*S*,3*R*,4*S*,5*S*,6*R*)-2-hydroxy-2,6-dimethyl-5-nitro-4-phenyltetrahydro-2*H*-pyran-3-yl]phosphonate (13b).**

Yield: 202 mg (36%), white crystals, m.p. 193–194 °C (methanol).

$[\alpha]_D^{20} +34.1$  (c 1.0, CHCl<sub>3</sub>). *dr* 14:1, > 99% *ee*.

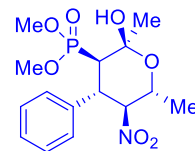

<sup>1</sup>H NMR (400 MHz, CDCl<sub>3</sub>, 298 K)  $\delta$  [ppm] 7.31-7.16 (m, 5H, aromatic), 4.59-4.52 (m, 1H, H-6), 4.39 (td, <sup>3</sup>*J*<sub>HH</sub> = 11.2 Hz, <sup>4</sup>*J*<sub>HP</sub> = 1.2 Hz, 1H, H-5), 4.00 (s, 1H, OH), 3.93 (td, <sup>3</sup>*J*<sub>HH</sub> = 12.0 Hz, <sup>3</sup>*J*<sub>HP</sub> = 8.8 Hz, 1H, H-4), 3.56 (d, <sup>3</sup>*J*<sub>HP</sub> = 10.7 Hz, 3H, MeO), 3.20 (d, <sup>3</sup>*J*<sub>HP</sub>



= 11.1 Hz, 3H, MeO), 2.50 (ddd,  $^2J_{HP}$  = 18.7,  $^3J_{HH}$  = 12.5 Hz,  $^4J_{HH}$  = 1.3 Hz, 1H, H-3), 1.80 (s, 3H, Me), 1.20 (d,  $^3J_{HH}$  = 6.4 Hz, 3H, Me).

$^{13}\text{C}$  NMR (101 MHz,  $\text{CDCl}_3$ , 298 K)  $\delta$  [ppm] 137.1 (s, aromatic), 128.6 (s, aromatic), 128.3 (s, aromatic), 128.0 (s, aromatic), 96.0 (s, C-2), 94.6 (d,  $^3J_{CP}$  = 14.3 Hz, C-5), 66.2 (s, C-6), 53.5 (d,  $^2J_{CP}$  = 6.7 Hz, MeO), 51.7 (d,  $^2J_{CP}$  = 6.7 Hz, MeO), 48.3 (d,  $^1J_{CP}$  = 138.0 Hz, C-3), 44.0 (s, C-4), 29.5 (s, Me), 18.1 (s, Me).

$^{31}\text{P}$  NMR (162 MHz,  $\text{CDCl}_3$ , 298 K)  $\delta$  [ppm] 27.32.

IR (ATR)  $\nu$  [ $\text{cm}^{-1}$ ] 3250 (m), 2958 (w), 2854 (w), 1544 (vs), 1379 (m), 1238 (vs), 1014 (vs), 740 (s), 700 (s), 545 (s).

HRMS (APPI):  $m/z$   $[\text{M}-\text{H}_2\text{O}+\text{H}]^+$  calcd for  $\text{C}_{15}\text{H}_{22}\text{NO}_7\text{P}-\text{H}_2\text{O}\cdot\text{H}^+$  342.1101; found 342.1096.

HPLC analysis (Chiralpak AD-3 column; hexane/*i*-PrOH, 92:8; flow rate 1.2 mL/min; wavelength 230 nm):  $t_R$  = 7.0 (2*R*,3*S*,4*R*,5*R*,6*S*), 7.7 (2*S*,3*R*,4*S*,5*S*,6*R*) min.

**Dimethyl [(2*S*,3*R*,4*S*,5*S*,6*R*)-2-hydroxy-2-methyl-5-nitro-4-phenyl-6-propyl-tetrahydro-2*H*-pyran-3-yl]phosphonate (13c).**

Yield: 216 mg (35%), white crystals, m.p. 180–181 °C (methanol).

$[\alpha]_D^{20}$  +55.6 (c 1.0,  $\text{CHCl}_3$ ).  $dr$  10:1.

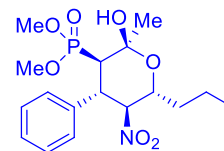

$^1\text{H}$  NMR (300 MHz,  $\text{CDCl}_3$ , 298 K)  $\delta$  [ppm] 7.34-7.19 (m, 5H, aromatic), 4.48 (s, 1H, OH), 4.52-4.45 (m, 1H, H-5), 4.05-3.89 (m, 1H, H-4), 3.80-3.63 (m, 1H, H-6), 3.57 (d,  $^3J_{HP}$  = 11.1 Hz, 3H, MeO), 3.24 (d,  $^3J_{HP}$  = 11.1 Hz, 3H, MeO), 2.53 (dd,  $^2J_{HP}$  = 18.3,  $^3J_{HH}$  = 12.6 Hz, 1H, H-3), 1.84 (s, 3H, Me), 1.62-1.28 (m, 4H, 2CH<sub>2</sub>), 0.91 (t,  $^3J_{HH}$  = 6.6 Hz, 3H, MeCH<sub>2</sub>).

$^{13}\text{C}$  NMR (75 MHz,  $\text{CDCl}_3$ , 298 K)  $\delta$  [ppm] 137.2 (s, aromatic), 128.5 (s, aromatic), 128.2 (s, aromatic), 127.9 (s, aromatic), 95.8 (s, C-2), 93.1 (d,  $^3J_{CP}$  = 14.3 Hz, C-5), 69.3 (s, C-6), 53.3 (d,  $^2J_{CP}$  = 6.6 Hz, MeO), 51.5 (d,  $^2J_{CP}$  = 6.7 Hz, MeO), 48.2 (d,  $^1J_{CP}$  = 138.3 Hz, C-3), 44.2 (s, C-4), 33.6 (s, CH<sub>2</sub>), 29.5 (s, Me), 17.8 (s, CH<sub>2</sub>), 13.7 (s, Me).



$^{31}\text{P}$  NMR (121 MHz,  $\text{CDCl}_3$ , 298 K)  $\delta$  [ppm] 26.67.

IR (ATR)  $\nu$  [ $\text{cm}^{-1}$ ] 3275 (m), 2954 (w), 2929 (w), 2872 (w), 1546 (vs), 1379 (m), 1238 (vs), 1024 (vs), 810 (s), 779 (s), 702 (s), 520 (vs).

HRMS (APPI):  $m/z$   $[\text{M}-\text{H}_2\text{O}+\text{H}]^+$  calcd for  $\text{C}_{17}\text{H}_{26}\text{NO}_7\text{P}-\text{H}_2\text{O}\cdot\text{H}^+$  370.1414; found 370.1418.

**Dimethyl [(2*S*,3*R*,4*S*,5*S*,6*R*)-2-hydroxy-6-isobutyl-2-methyl-5-nitro-4-phenyl-tetrahydro 2*H*-pyran-3-yl]phosphonate (13d).**

Yield: 191 mg (30%), white crystals, m.p. 153–154 °C (methanol).

$[\alpha]_D^{20} +51.5$  (c 1.0,  $\text{CHCl}_3$ ). *dr* 9:1.

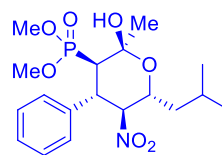

$^1\text{H}$  NMR (400 MHz,  $\text{CDCl}_3$ , 298 K)  $\delta$  [ppm] 7.29-7.15 (m, 5H, aromatic), 4.48 (td,  $^3J_{\text{HH}} = 9.9$  Hz,  $^4J_{\text{HP}} = 1.6$  Hz, 1H, H-5), 4.41 (t,  $^3J_{\text{HH}} = 9.9$  Hz, 1H, H-6), 4.13 (s, 1H, OH), 3.97-3.89 (m, 1H, H-4), 3.56 (d,  $^3J_{\text{HP}} = 10.7$  Hz, 3H, MeO), 3.18 (d,  $^3J_{\text{HP}} = 11.2$  Hz, 3H, MeO), 2.49 (dd,  $^2J_{\text{HP}} = 18.5$ ,  $^3J_{\text{HH}} = 12.3$  Hz, 1H, H-3), 1.81 (s, 3H, Me), 1.53-1.46 (m, 1H,  $\text{CH}_2$ ), 1.13-1.06 (m, 1H,  $\text{CH}_2$ ), 0.89-0.84 (m, 1H, CH, *i*-Bu), 0.88 (d,  $^3J_{\text{HH}} = 6.8$  Hz, 3H, **MeCH**), 0.84 (d,  $^3J_{\text{HH}} = 6.4$  Hz, 3H, **MeCH**).

$^{13}\text{C}$  NMR (101 MHz,  $\text{CDCl}_3$ , 298 K)  $\delta$  [ppm] 137.2 (s, aromatic), 128.6 (s, aromatic), 128.3 (s, aromatic), 128.0 (s, aromatic), 95.8 (s, C-2), 93.7 (d,  $^3J_{\text{CP}} = 14.3$  Hz, C-5), 67.9 (s, C-6), 53.5 (d,  $^2J_{\text{CP}} = 6.7$  Hz, MeO), 51.6 (d,  $^2J_{\text{CP}} = 6.7$  Hz, MeO), 48.5 (d,  $^1J_{\text{CP}} = 138.0$  Hz, C-3), 44.4 (s, C-4), 40.4 (s,  $\text{CH}_2$ , *i*-Bu), 29.4 (s, Me), 23.9 (s, CH, *i*-Bu), 23.6 (s,  $\text{CH}_3$ , *i*-Bu), 21.2 (s,  $\text{CH}_3$ , *i*-Bu).

$^{31}\text{P}$  NMR (162 MHz,  $\text{CDCl}_3$ , 298 K)  $\delta$  [ppm] 27.37.

IR (ATR)  $\nu$  [ $\text{cm}^{-1}$ ] 3280 (m), 2954 (w), 2870 (w), 1548 (vs), 1369 (m), 1232 (vs), 1033 (vs), 761 (s), 698 (s).

HRMS (APPI):  $m/z$   $[\text{M}-\text{H}_2\text{O}+\text{H}]^+$  calcd for  $\text{C}_{18}\text{H}_{28}\text{NO}_7\text{P}-\text{H}_2\text{O}\cdot\text{H}^+$  384.1570; found 384.1575.



**Dimethyl [(2*S*,3*R*,4*S*,5*S*,6*R*)-2-hydroxy-2-methyl-5-nitro-4,6-diphenyltetrahydro-2*H*-pyran-3-yl]phosphonate (13e).**

Yield: 214 mg (32%), white crystals, m.p. 197–198 °C (methanol).

$[\alpha]_D^{20} +66.0$  (c 0.5, CHCl<sub>3</sub>). *dr* 1:-.

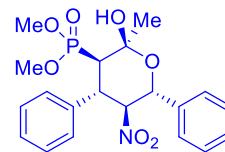

<sup>1</sup>H NMR (400 MHz, CDCl<sub>3</sub>, 298 K)  $\delta$  [ppm] 7.33-7.21 (m, 10H, aromatic), 5.46 (d, <sup>3</sup>*J*<sub>HH</sub> = 9.8 Hz, 1H, H-6), 4.67 (td, <sup>3</sup>*J*<sub>HH</sub> = 9.8 Hz, <sup>4</sup>*J*<sub>HP</sub> = 1.1 Hz, 1H, H-5), 4.12 (td, <sup>3</sup>*J*<sub>HH</sub> = 11.6 Hz, <sup>3</sup>*J*<sub>HP</sub> = 8.7 Hz, 1H, H-4), 3.61 (d, <sup>3</sup>*J*<sub>HP</sub> = 10.9 Hz, 3H, MeO), 3.23 (d, <sup>3</sup>*J*<sub>HP</sub> = 10.9 Hz, 3H, MeO), 2.67 (dd, <sup>2</sup>*J*<sub>HP</sub> = 18.7, <sup>3</sup>*J*<sub>HH</sub> = 12.4 Hz, 1H, H-3), 1.92 (s, 3H, Me).

<sup>13</sup>C NMR (101 MHz, CDCl<sub>3</sub>, 298 K)  $\delta$  [ppm] 136.8 (s, aromatic), 135.9 (s, aromatic), 129.4 (s, aromatic), 128.9 (s, aromatic), 128.6 (s, aromatic), 128.1 (s, aromatic), 127.1 (s, aromatic), 97.1 (s, C-2), 94.6 (d, <sup>3</sup>*J*<sub>CP</sub> = 14.3 Hz, C-5), 72.8 (s, C-6), 53.6 (d, <sup>2</sup>*J*<sub>CP</sub> = 6.7 Hz, MeO), 51.7 (d, <sup>2</sup>*J*<sub>CP</sub> = 6.7 Hz, MeO), 48.2 (d, <sup>1</sup>*J*<sub>CP</sub> = 138.0 Hz, C-3), 44.7 (s, C-4), 29.7 (s, Me).

<sup>31</sup>P NMR (162 MHz, CDCl<sub>3</sub>, 298 K)  $\delta$  [ppm] 26.85.

IR (ATR)  $\nu$  [cm<sup>-1</sup>] 3300 (m), 3188 (m), 2954 (w), 2856 (w), 1550 (vs), 1375 (m), 1238 (vs), 1041 (vs), 761 (s), 750 (s), 696 (vs), 528 (s), 520 (s).

HRMS (APPI): *m/z* [M-H<sub>2</sub>O+H]<sup>+</sup> calcd for C<sub>20</sub>H<sub>24</sub>NO<sub>7</sub>P-H<sub>2</sub>O·H<sup>+</sup> 404.1257; found 404.1257.

**Dimethyl [(2*S*,3*R*,4*S*,5*S*,6*R*)-6-(4-chlorophenyl)-2-hydroxy-2-methyl-5-nitro-4-phenyltetrahydro-2*H*-pyran-3-yl]phosphonate (13f).**

Yield: 217 mg (30%), white crystals, m.p. 183–184 °C (methanol).

$[\alpha]_D^{20} +66.4$  (c 1.0, CHCl<sub>3</sub>). *dr* 1:-.

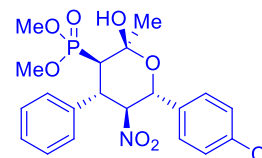

<sup>1</sup>H NMR (400 MHz, CDCl<sub>3</sub>, 298 K)  $\delta$  [ppm] 7.31-7.20 (m, 9H, aromatic), 5.44 (d, <sup>3</sup>*J*<sub>HH</sub> = 9.8 Hz, 1H, H-6), 4.60 (t, <sup>3</sup>*J*<sub>HH</sub> = 11.2 Hz, 1H, H-5), 4.10 (td, <sup>3</sup>*J*<sub>HH</sub> = 11.9 Hz, <sup>3</sup>*J*<sub>HP</sub> = 8.6 Hz, 1H, H-4), 3.59 (d, <sup>3</sup>*J*<sub>HP</sub> = 10.9 Hz, 3H, MeO), 3.47 (s, 1H, OH), 3.24 (d, <sup>3</sup>*J*<sub>HP</sub> = 11.2 Hz, 3H, MeO), 2.66 (dd, <sup>2</sup>*J*<sub>HP</sub> = 18.7, <sup>3</sup>*J*<sub>HH</sub> = 12.4 Hz, 1H, H-3), 1.91 (s, 3H, Me).



$^{13}\text{C}$  NMR (101 MHz,  $\text{CDCl}_3$ , 298 K)  $\delta$  [ppm] 136.6 (s, aromatic), 135.3 (s, aromatic), 134.5 (s, aromatic), 129.1 (s, aromatic), 128.7 (s, aromatic), 128.4 (s, aromatic), 128.2 (s, aromatic), 97.1 (s, C-2), 94.5 (d,  $^3J_{\text{CP}} = 15.3$  Hz, C-5), 72.2 (s, C-6), 53.6 (d,  $^2J_{\text{CP}} = 6.7$  Hz, MeO), 51.7 (d,  $^2J_{\text{CP}} = 6.7$  Hz, MeO), 48.2 (d,  $^1J_{\text{CP}} = 138.0$  Hz, C-3), 44.6 (s, C-4), 29.6 (s, Me).

$^{31}\text{P}$  NMR (162 MHz,  $\text{CDCl}_3$ , 298 K)  $\delta$  [ppm] 26.72.

IR (ATR)  $\nu$  [ $\text{cm}^{-1}$ ] 3321 (m), 2951 (w), 2916 (w), 2850 (w), 1548 (vs), 1373 (m), 1228 (vs), 1024 (vs), 900 (s), 752 (vs), 698 (s), 594 (s), 536 (s).

HRMS (APPI):  $m/z$   $[\text{M}-\text{H}_2\text{O}+\text{H}]^+$  calcd for  $\text{C}_{20}\text{H}_{23}\text{ClNO}_7\text{P}-\text{H}_2\text{O}-\text{H}^+$  438.0867; found 438.0873.

**Dimethyl [(2*R*,3*S*,4*S*)-2,6-dimethyl-3-nitro-4-phenyl-3,4-dihydro-2*H*-pyran-5-yl]phosphonate (14).**

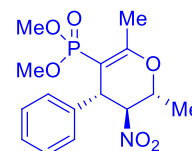

TsOH (5 mg, 0.029 mmol) was added to a solution of **13b** (206 mg, 0.573 mmol) in 8 mL of toluene and the resulting mixture was refluxed for 2 h. Then the reaction mixture was evaporated at reduced pressure. The residue was dissolved in  $\text{CHCl}_3$  and filtered through silica gel (1.0 g). The filtrate was evaporated in vacuo.

Yield: 168 mg (86%); yellow oil;  $[\alpha]_D^{20} -24.0$  (c 1.0,  $\text{CHCl}_3$ ).

$^1\text{H}$  NMR (300 MHz,  $\text{CDCl}_3$ , 298 K)  $\delta$  [ppm] 7.33-7.15 (m, 5H, aromatic), 4.48 (t,  $^3J_{\text{HH}} = 9.3$  Hz, 1H, H-5), 4.31-4.26 (m, 2H, H-4, H-6), 3.51 (d,  $^3J_{\text{HP}} = 11.2$  Hz, 3H, MeO), 3.25 (d,  $^3J_{\text{HP}} = 11.1$  Hz, 3H, MeO), 2.25 (s, 3H, Me), 1.35 (d,  $^3J_{\text{HH}} = 6.2$  Hz, 3H, Me).

$^{13}\text{C}$  NMR (75 MHz,  $\text{CDCl}_3$ , 298 K)  $\delta$  [ppm] 165.3 (d,  $^2J_{\text{CP}} = 24.1$  Hz, C-2), 139.1 (s, aromatic), 128.8 (s, aromatic), 127.9 (s, aromatic), 99.1 (d,  $^1J_{\text{CP}} = 203.3$  Hz, C-3), 93.4 (d,  $^3J_{\text{CP}} = 11.8$  Hz, C-5), 72.7 (s, C-6), 52.02 (d,  $^2J_{\text{CP}} = 6.0$  Hz, MeO), 51.95 (d,  $^2J_{\text{CP}} = 6.0$  Hz, MeO), 46.4 (d,  $^2J_{\text{CP}} = 9.1$  Hz, C-4), 20.1 (d,  $^3J_{\text{CP}} = 2.2$  Hz, Me), 17.2 (s, Me).

$^{31}\text{P}$  NMR (121 MHz,  $\text{CDCl}_3$ , 298 K)  $\delta$  [ppm] 21.79.



IR (ATR)  $\nu$  [ $\text{cm}^{-1}$ ] 2987 (w), 2953 (w), 2848 (w), 1620 (s), 1550 (vs) 1456 (m), 1249 (s), 1020 (vs), 754 (s), 700 (s), 596 (s).

HRMS (APPI):  $m/z$   $[\text{M}+\text{H}]^+$  calcd for  $\text{C}_{15}\text{H}_{20}\text{NO}_6\text{P}\cdot\text{H}^+$  342.1101; found 342.1106.



## 6. Copies of NMR, FTIR and mass spectra for initial compounds

<sup>1</sup>H NMR spectra of methyl 2-(2-bromo-1-phenylethylidene)hydrazine-1-carboxylate **IIIa** in CDCl<sub>3</sub>

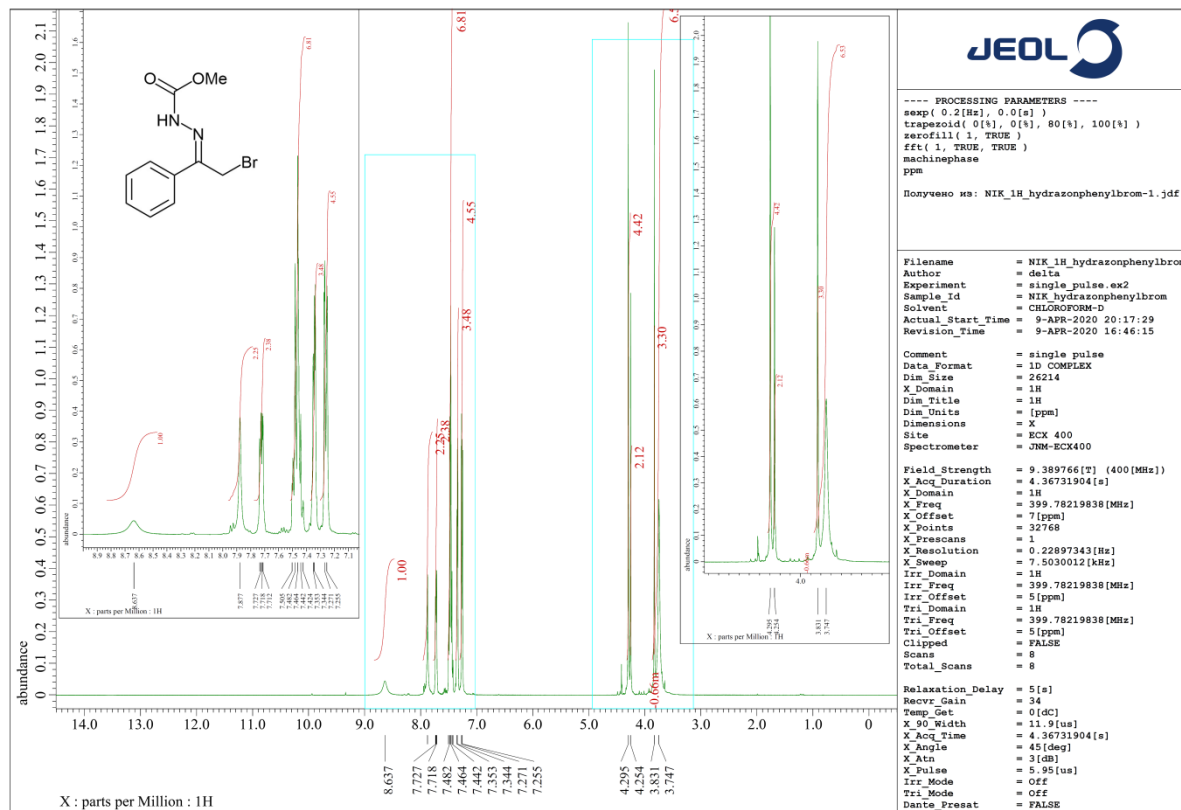

<sup>13</sup>C NMR spectra of methyl 2-(2-bromo-1-phenylethylidene)hydrazine-1-carboxylate **IIIa** in CDCl<sub>3</sub>

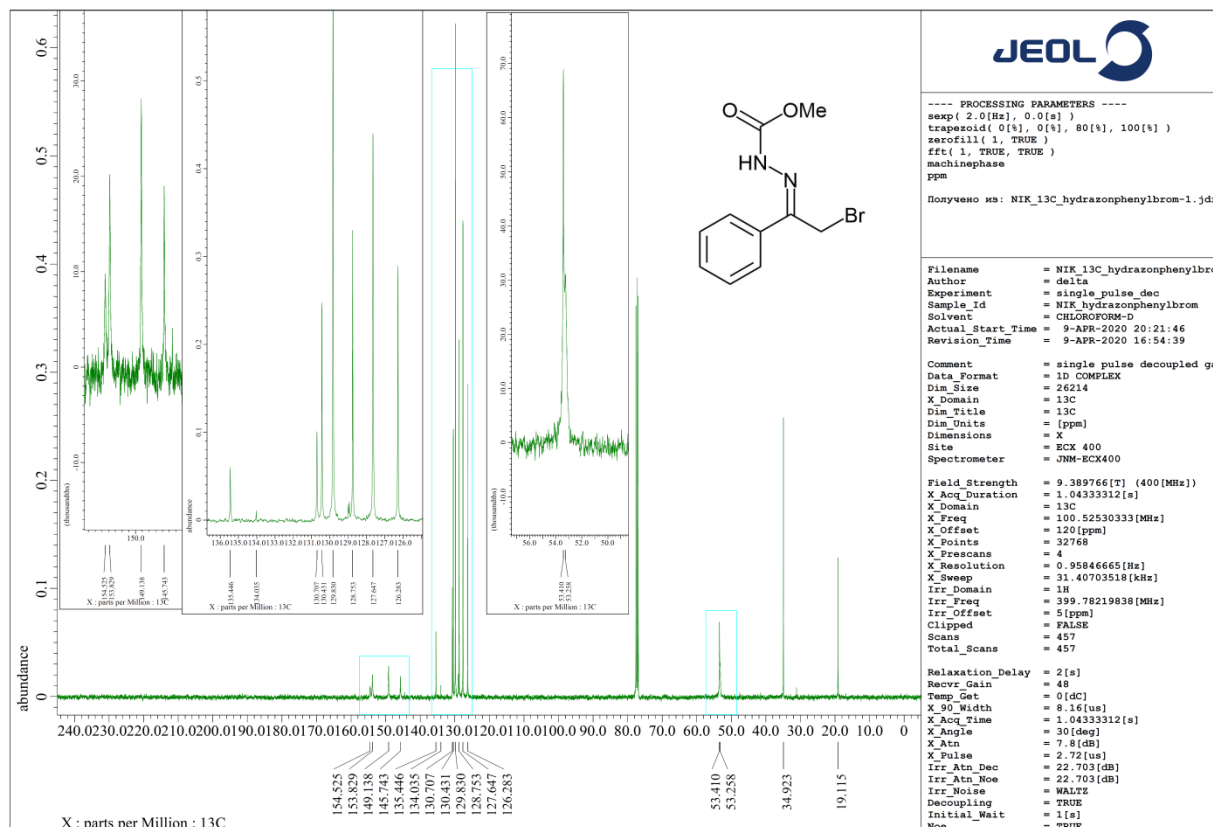



DEPT NMR spectra of methyl 2-(2-bromo-1-phenylethylidene)hydrazine-1-carboxylate **IIIa** in CDCl<sub>3</sub>

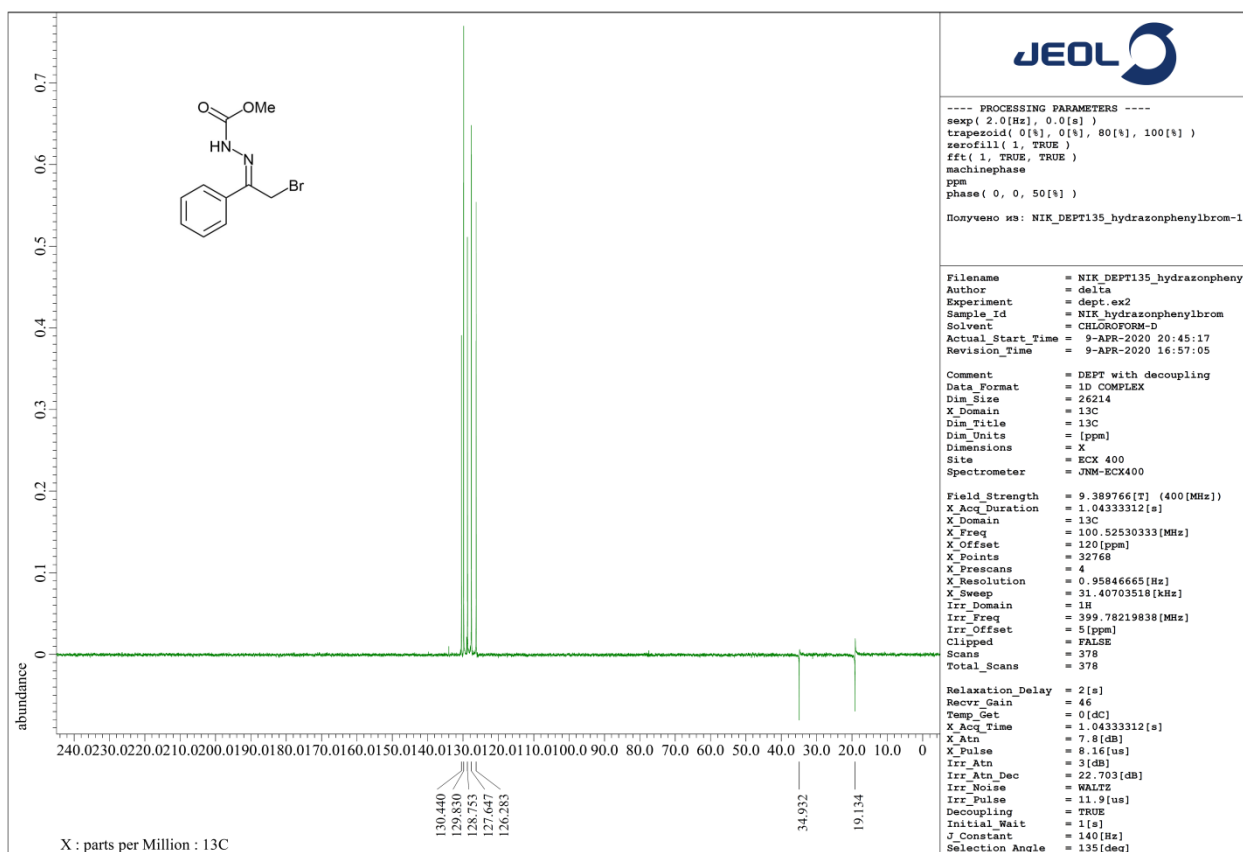

FTIR spectra of methyl 2-[2-bromo-1-(4-methoxyphenyl)ethylidene]hydrazine-1-carboxylate **IIIb**

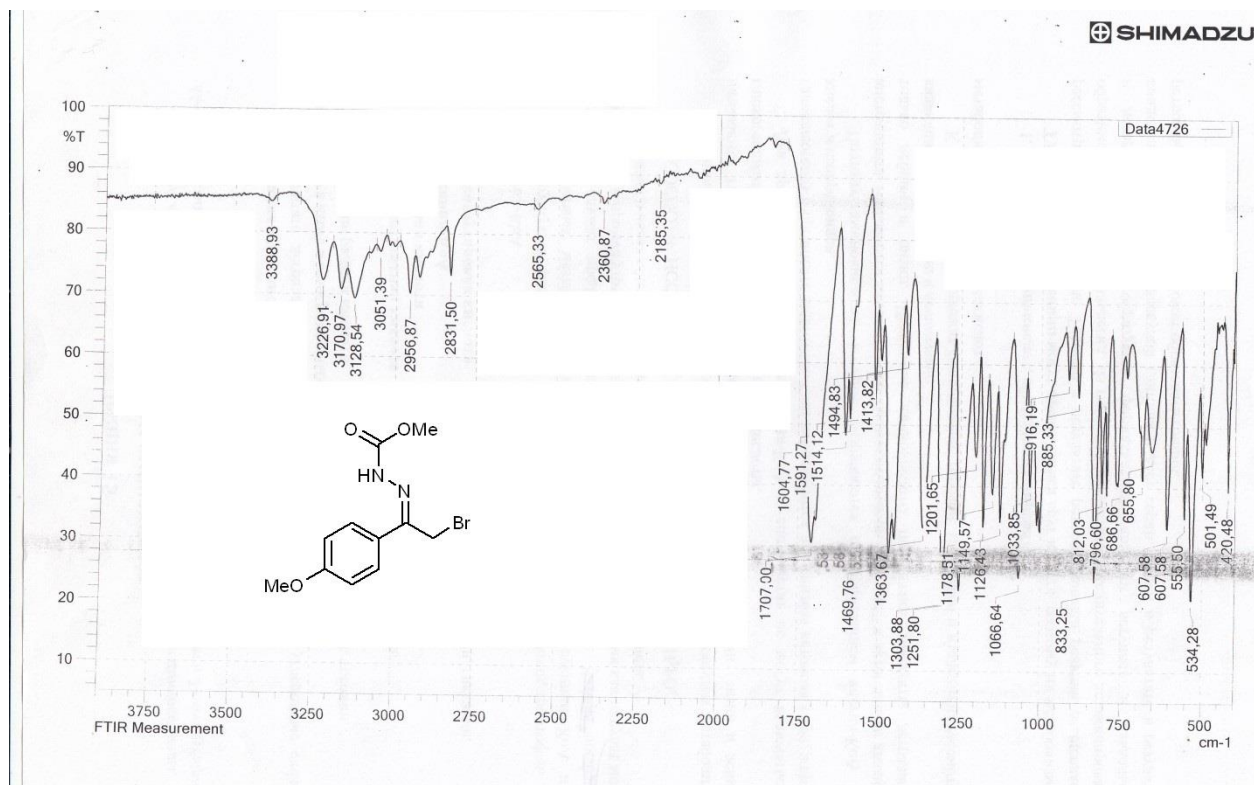



<sup>1</sup>H NMR spectra of methyl 2-[2-bromo-1-(4-methoxyphenyl)ethylidene]hydrazine-1-carboxylate **IIIb**  
in CDCl<sub>3</sub>

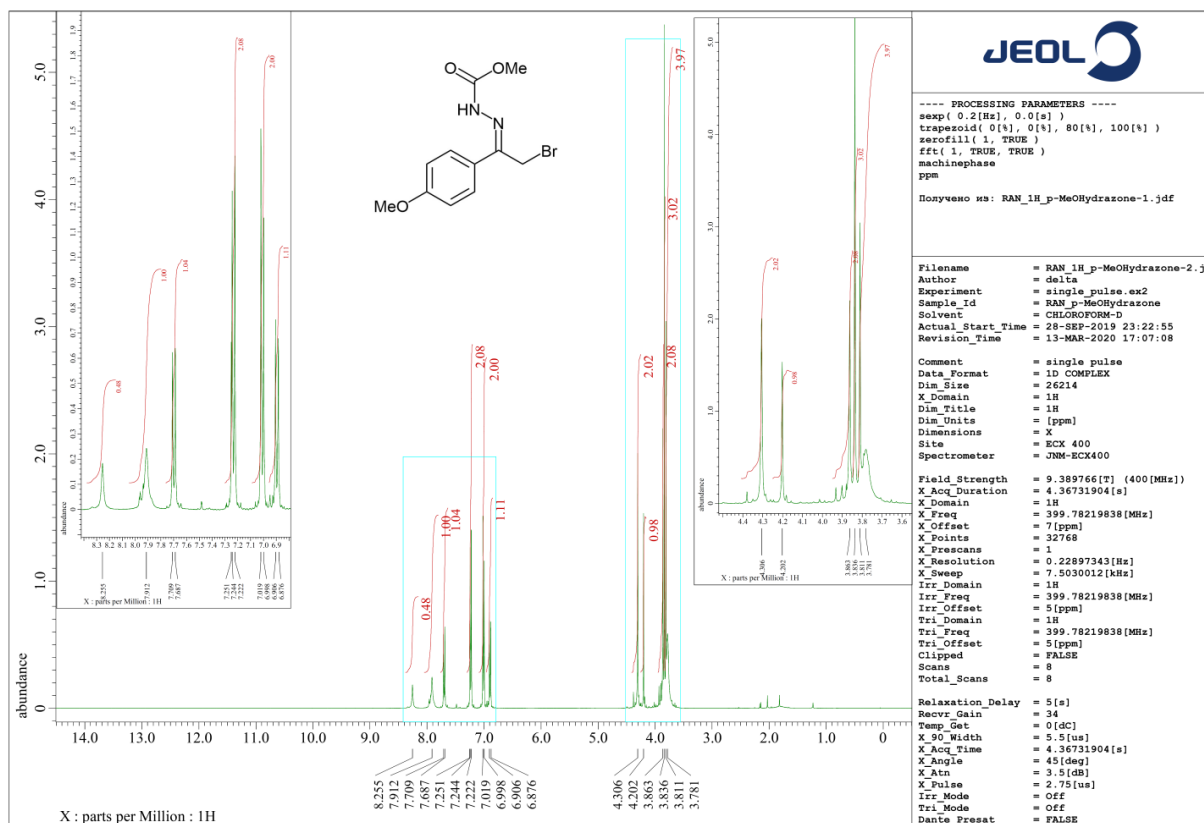

<sup>13</sup>C NMR spectra of methyl 2-[2-bromo-1-(4-methoxyphenyl)ethylidene]hydrazine-1-carboxylate **IIIb**  
in CDCl<sub>3</sub>

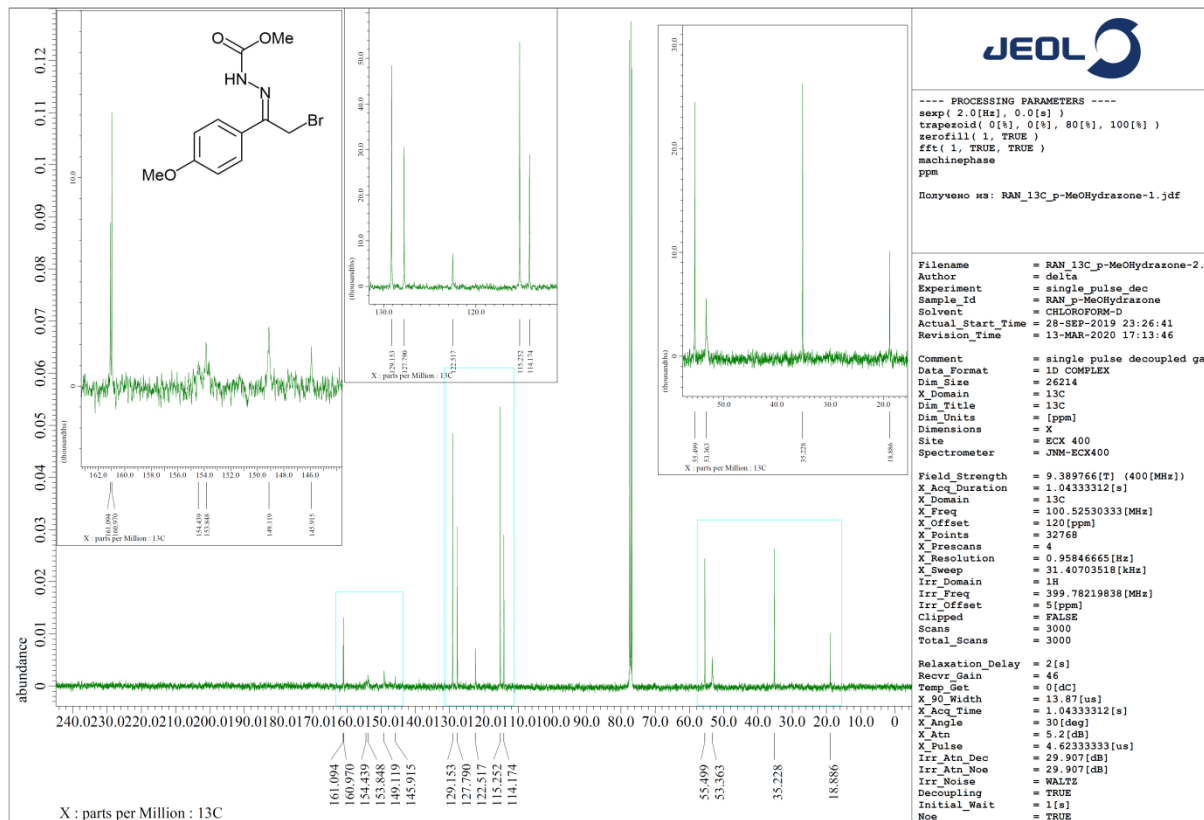



DEPT NMR spectra of methyl 2-[2-bromo-1-(4-methoxyphenyl)ethylidene]hydrazine-1-carboxylate **IIIb**  
in CDCl<sub>3</sub>

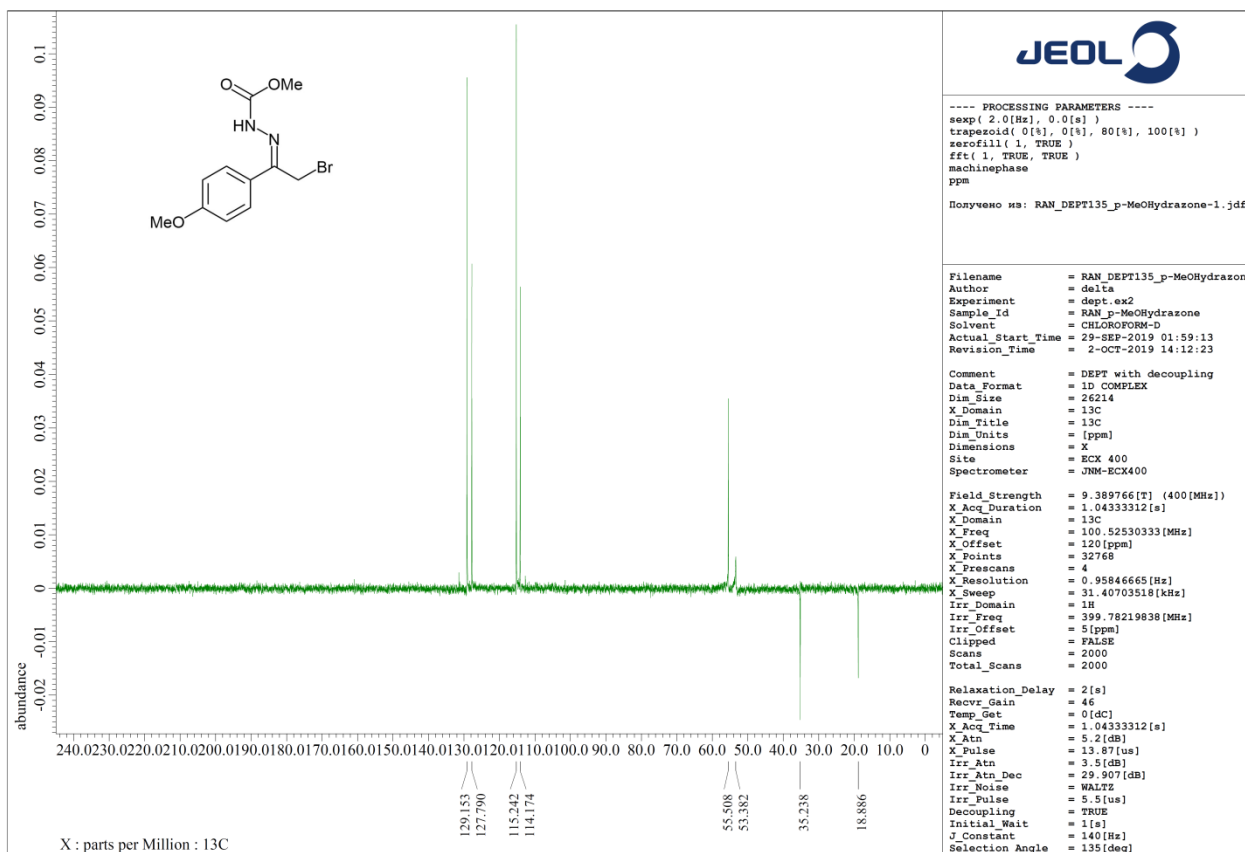

FTIR spectra of methyl 2-[2-bromo-1-(3-methoxyphenyl)ethylidene]hydrazine-1-carboxylate **IIIc**

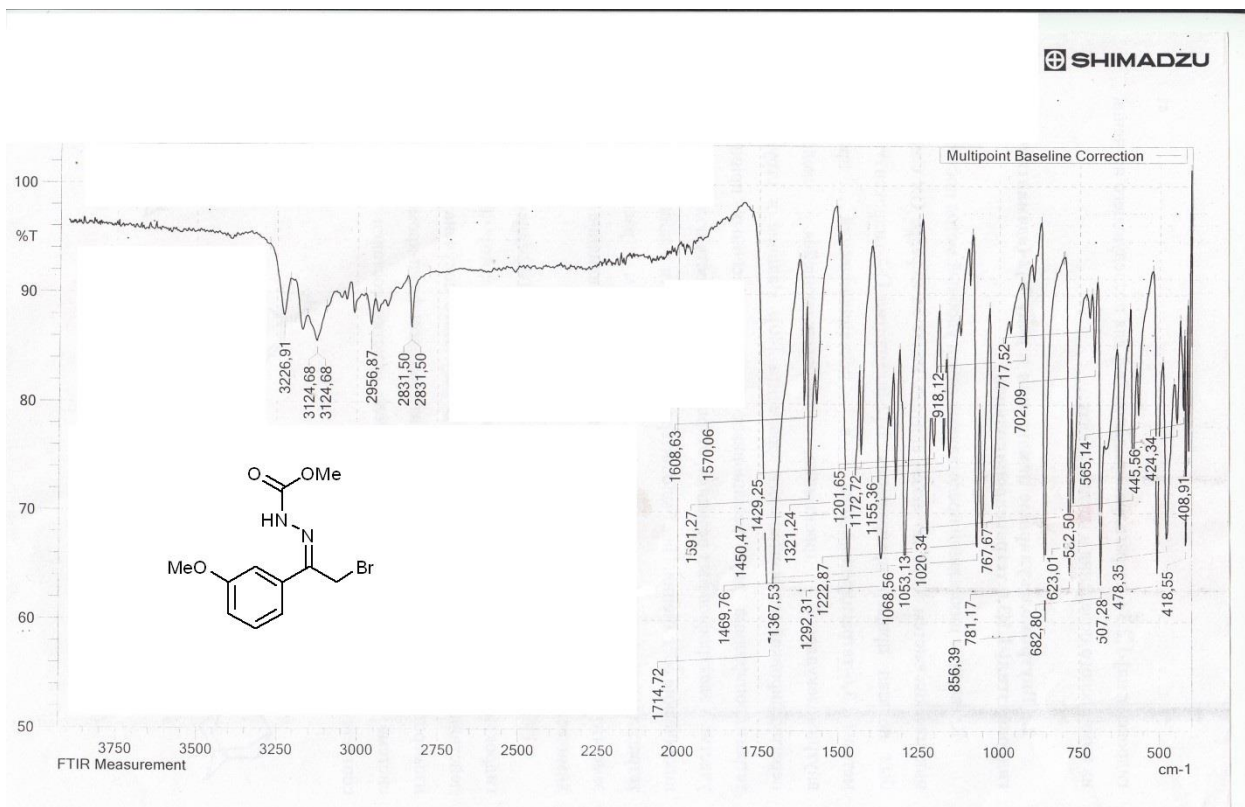



<sup>1</sup>H NMR spectra of methyl 2-[2-bromo-1-(3-methoxyphenyl)ethylidene]hydrazine-1-carboxylate **IIIc**  
in CDCl<sub>3</sub>

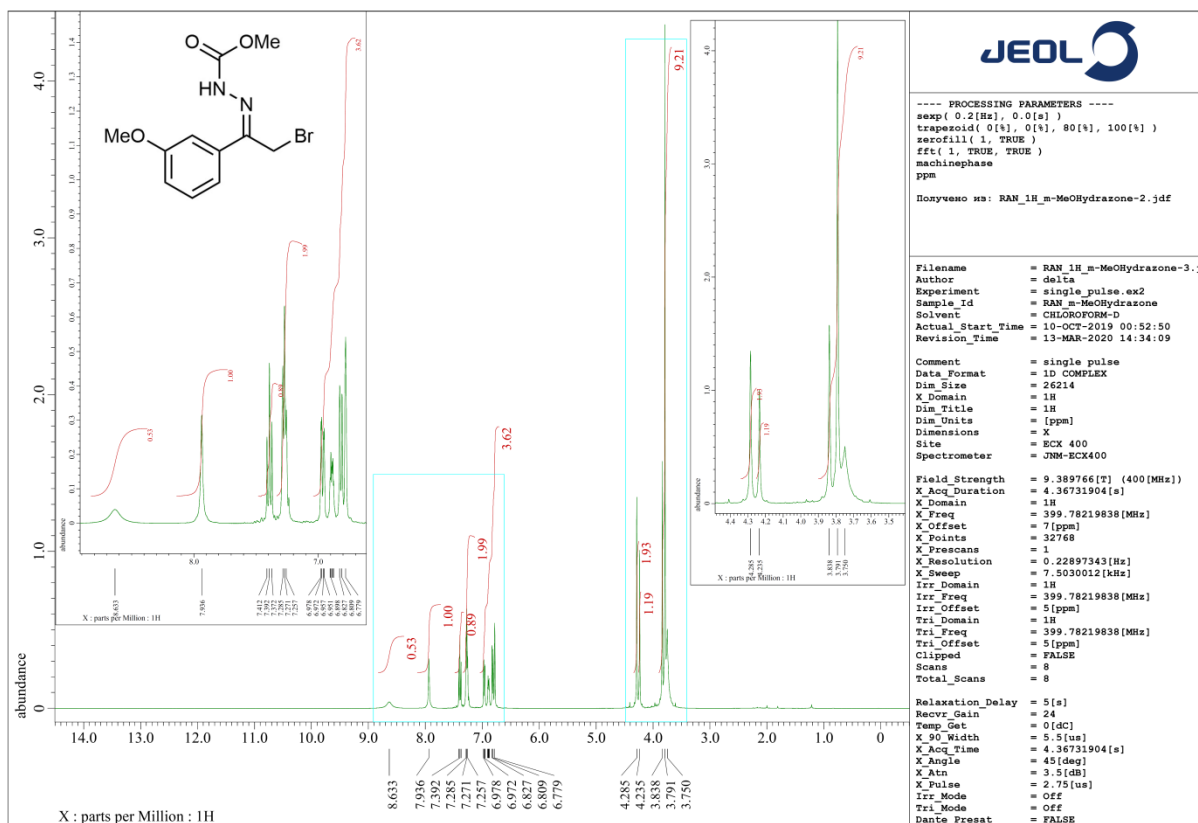

<sup>13</sup>C NMR spectra of methyl 2-[2-bromo-1-(3-methoxyphenyl)ethylidene]hydrazine-1-carboxylate **IIIc** in  
CDCl<sub>3</sub>

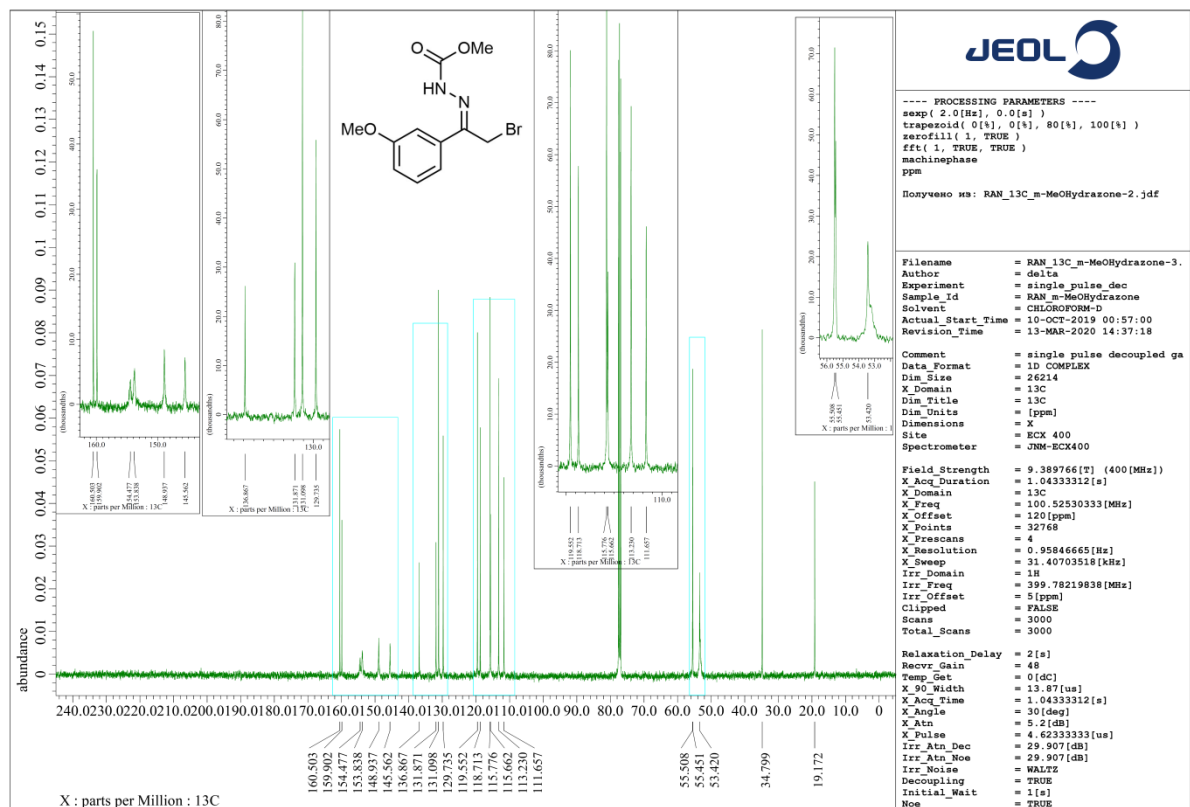



DEPT NMR spectra of methyl 2-[2-bromo-1-(3-methoxyphenyl)ethylidene]hydrazine-1-carboxylate **IIIc** in

CDCl<sub>3</sub>

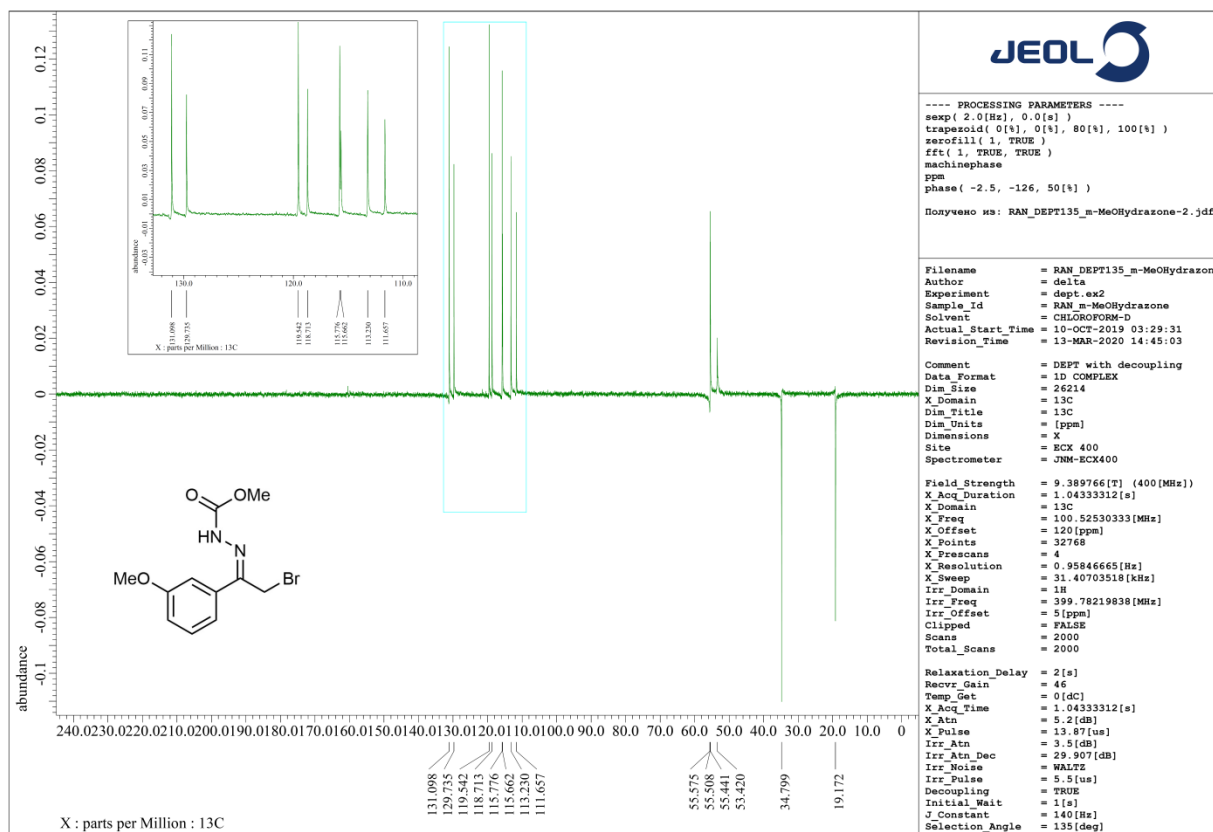

FTIR spectra of methyl 2-[2-bromo-1-(2-methoxyphenyl)ethylidene]hydrazine-1-carboxylate **IIId**

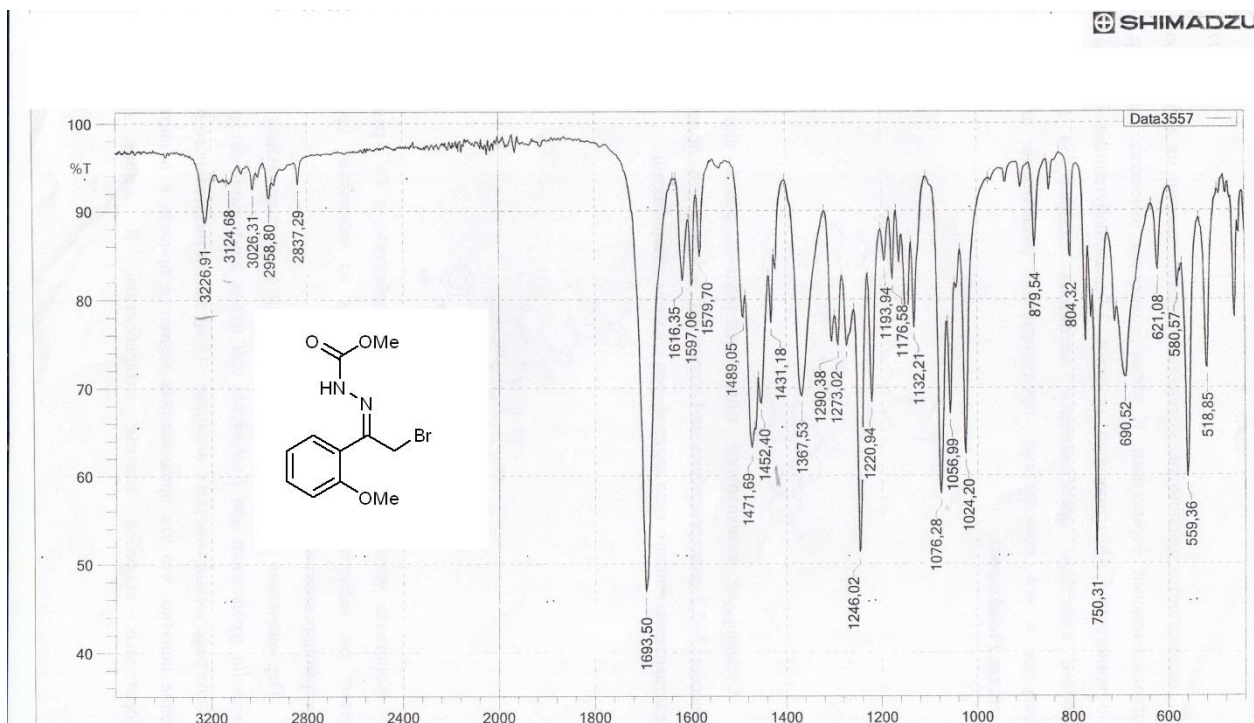



<sup>1</sup>H NMR spectra of methyl 2-[2-bromo-1-(2-methoxyphenyl)ethylidene]hydrazine-1-carboxylate **IIId**  
in CDCl<sub>3</sub>

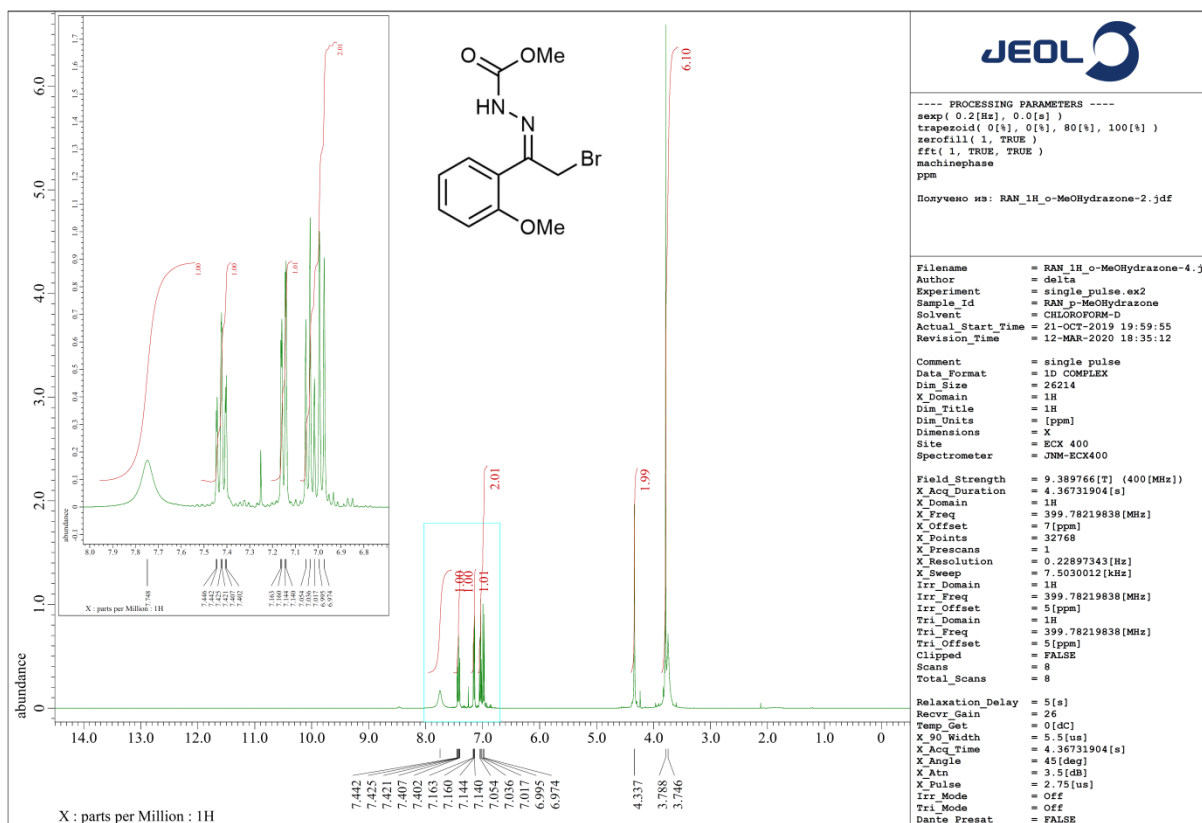

<sup>13</sup>C NMR spectra of methyl 2-[2-bromo-1-(2-methoxyphenyl)ethylidene]hydrazine-1-carboxylate **IIId**  
in CDCl<sub>3</sub>

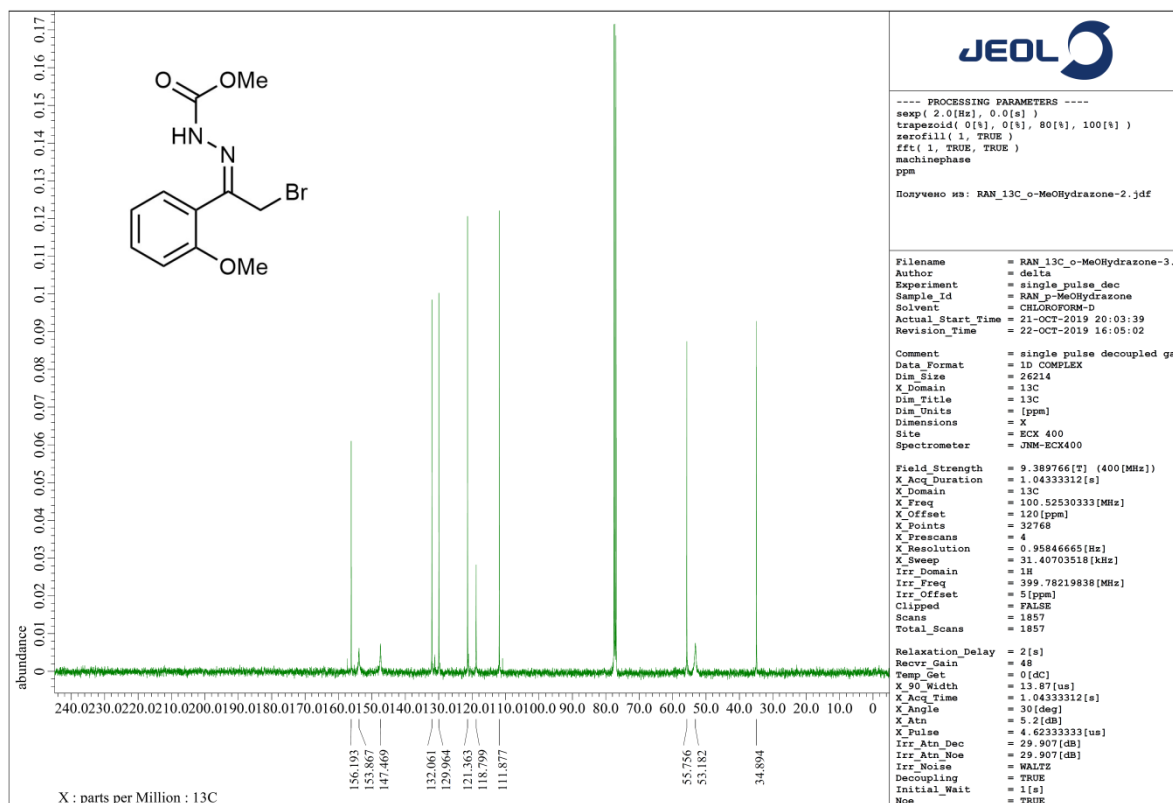



DEPT NMR spectra of methyl 2-[2-bromo-1-(2-methoxyphenyl)ethylidene]hydrazine-1-carboxylate **IIIId**  
in CDCl<sub>3</sub>

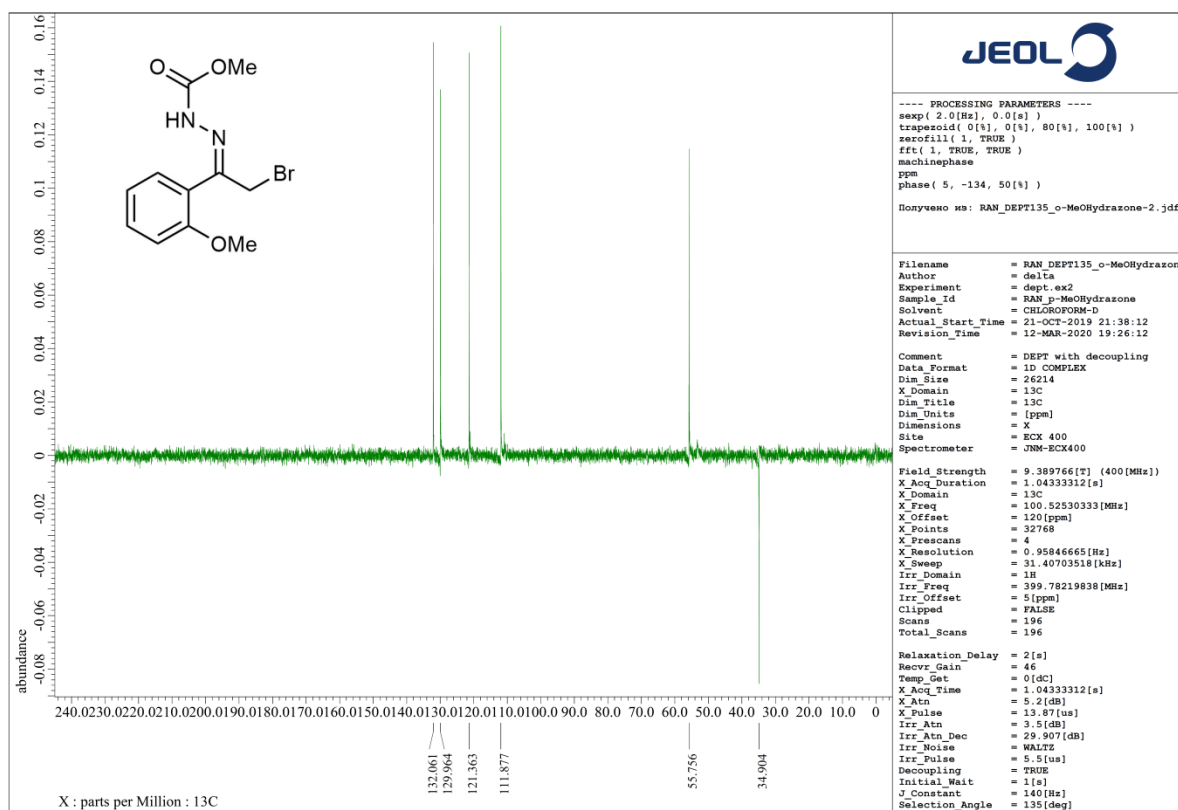

FTIR spectra of methyl 2-(1-(adamantan-1-yl)-2-bromoethylidene)hydrazine-1-carboxylate

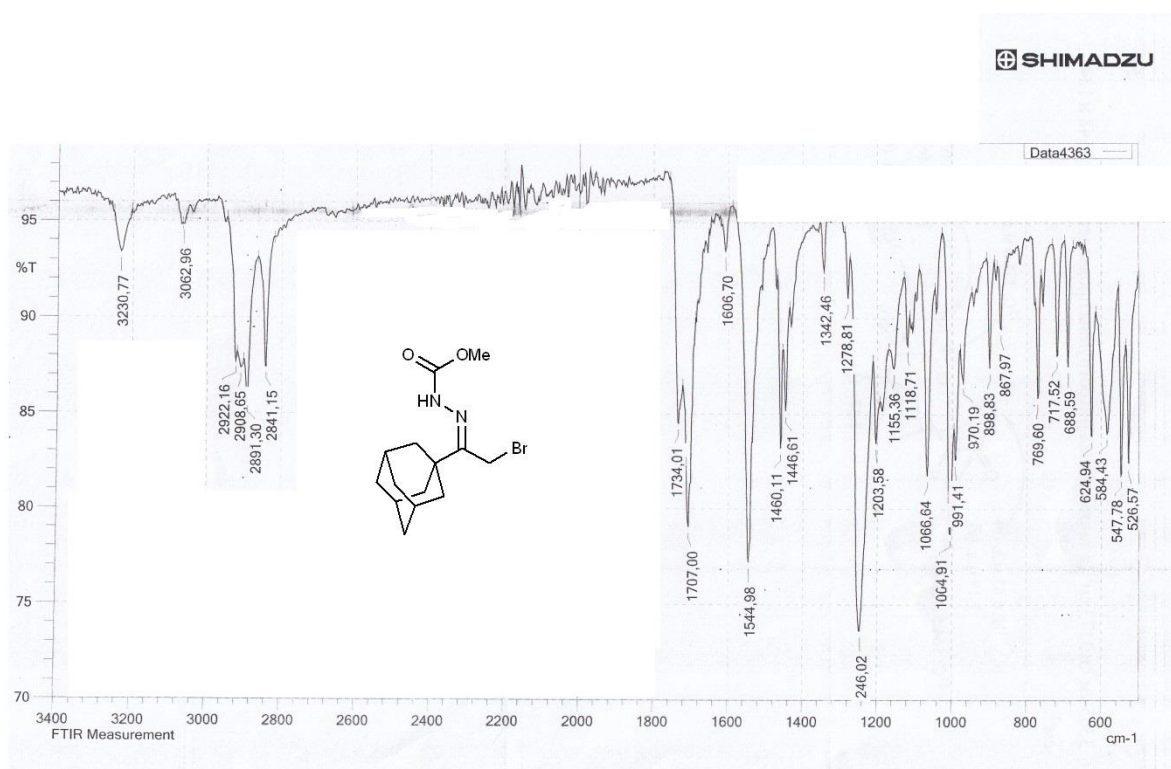



<sup>1</sup>H NMR spectra of methyl 2-(1-(adamantan-1-yl)-2-bromoethylidene)hydrazine-1-carboxylate in CDCl<sub>3</sub>

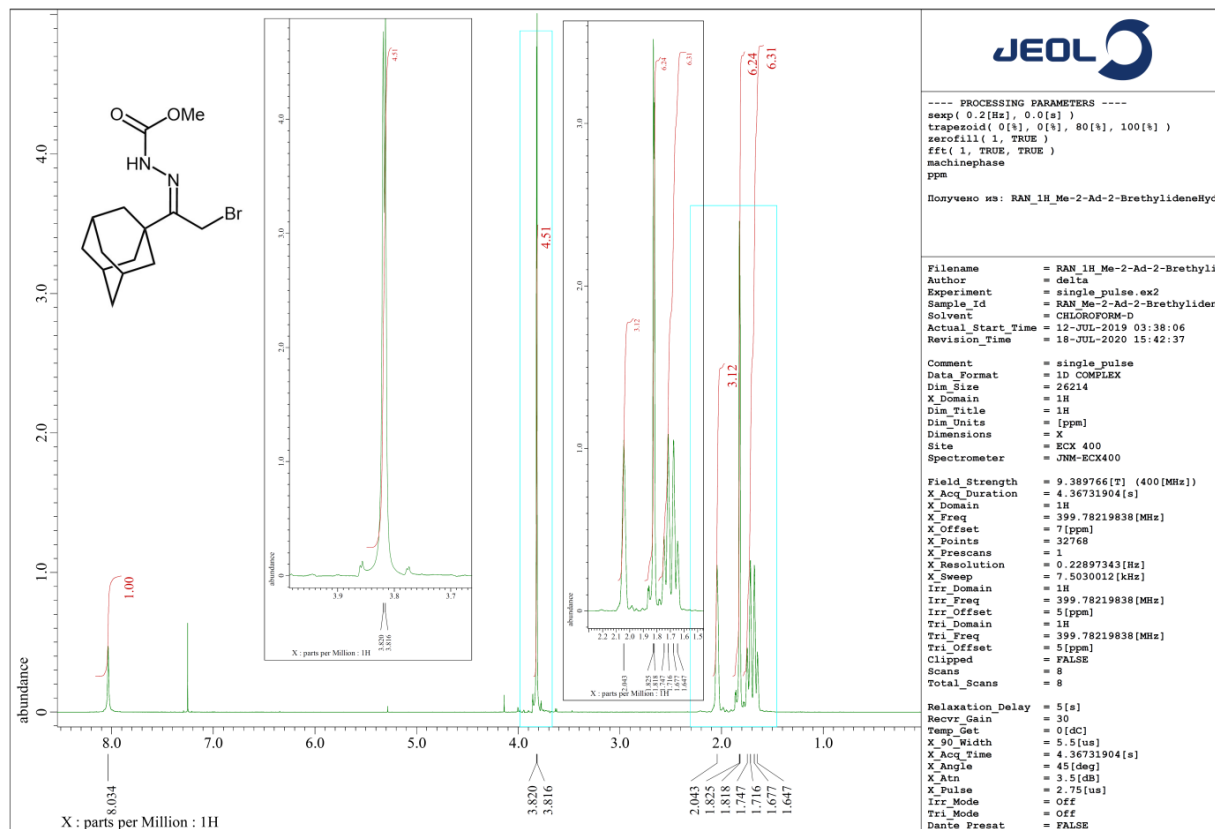

<sup>13</sup>C NMR spectra of methyl 2-(1-(adamantan-1-yl)-2-bromoethylidene)hydrazine-1-carboxylate in CDCl<sub>3</sub>

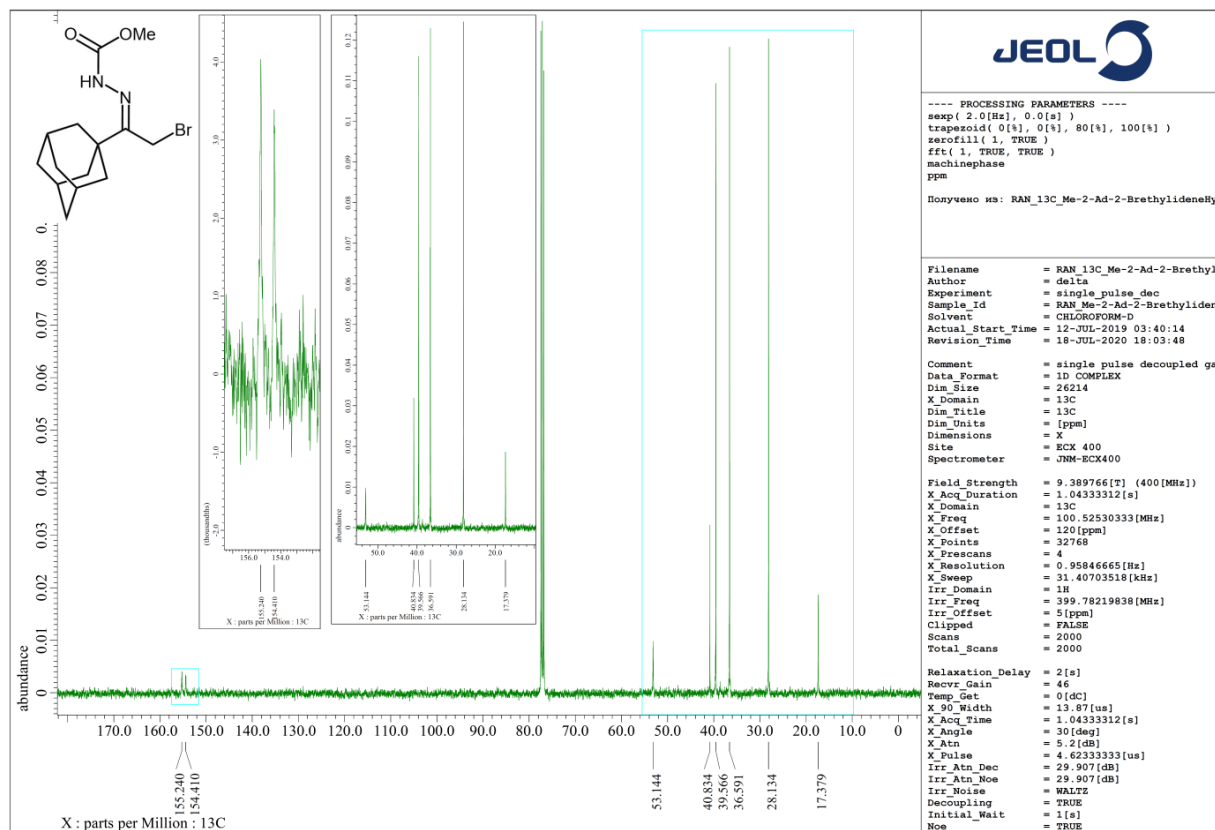



DEPT NMR spectra of methyl 2-(1-(adamantan-1-yl)-2-bromoethylidene)hydrazine-1-carboxylate in  $\text{CDCl}_3$

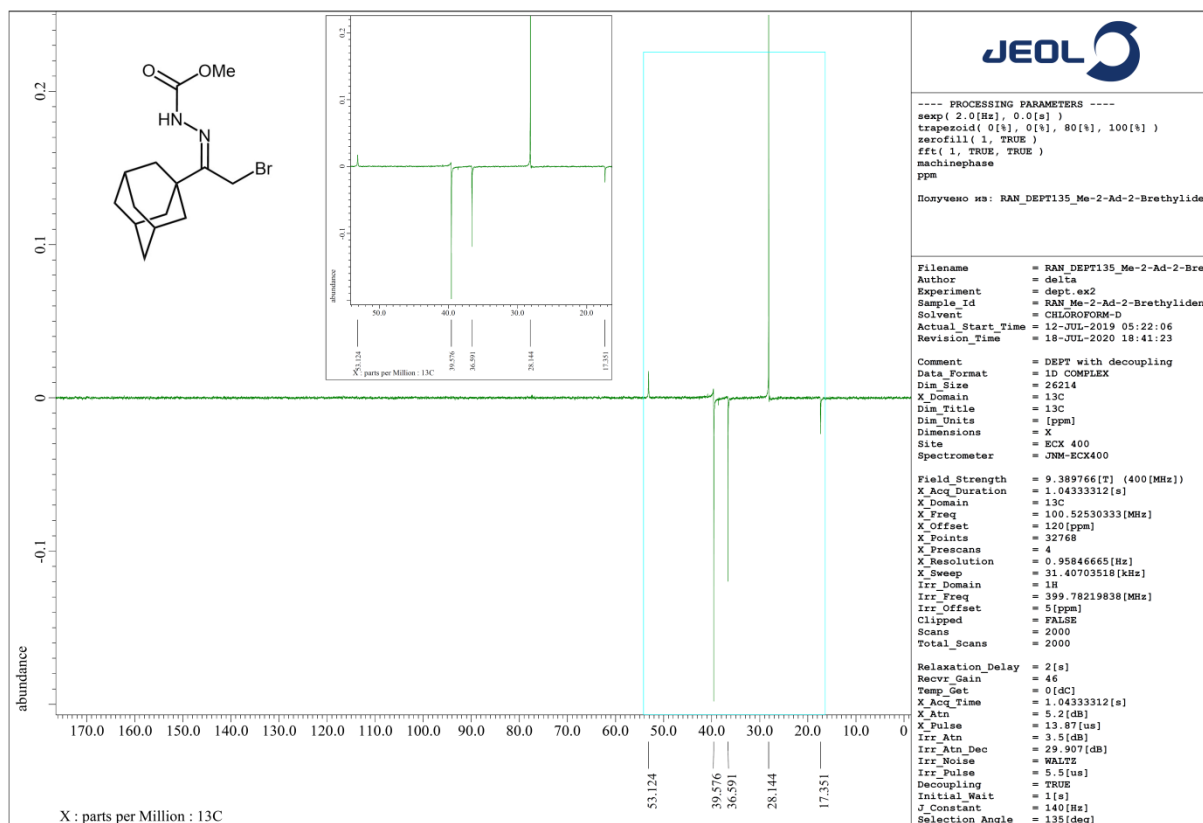

$^1\text{H}$  NMR spectra of methyl 2-[2-(dimethoxyphosphoryl)-1-phenylethylidene]hydrazine-1-carboxylate **Va** in  $\text{CDCl}_3$

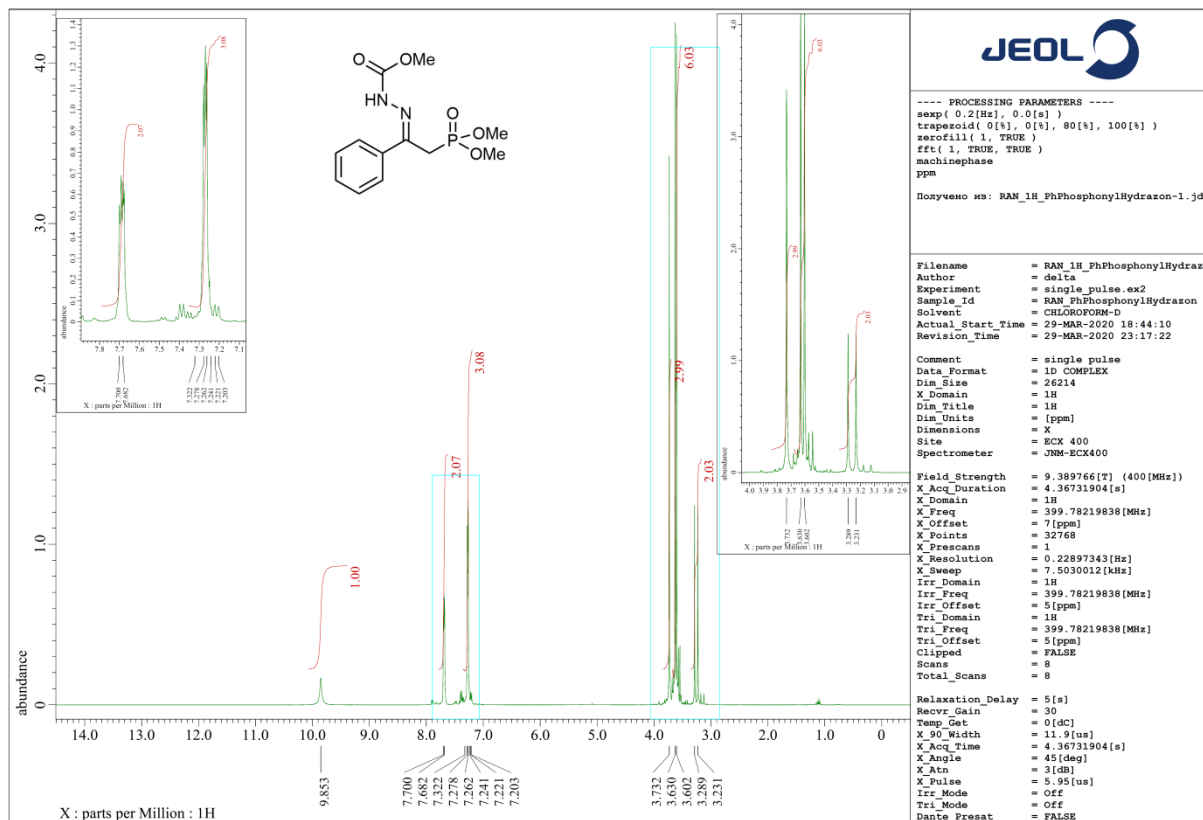



<sup>13</sup>C NMR spectra of methyl 2-[2-(dimethoxyphosphoryl)-1-phenylethylidene]hydrazine-1-carboxylate **Va**  
in CDCl<sub>3</sub>

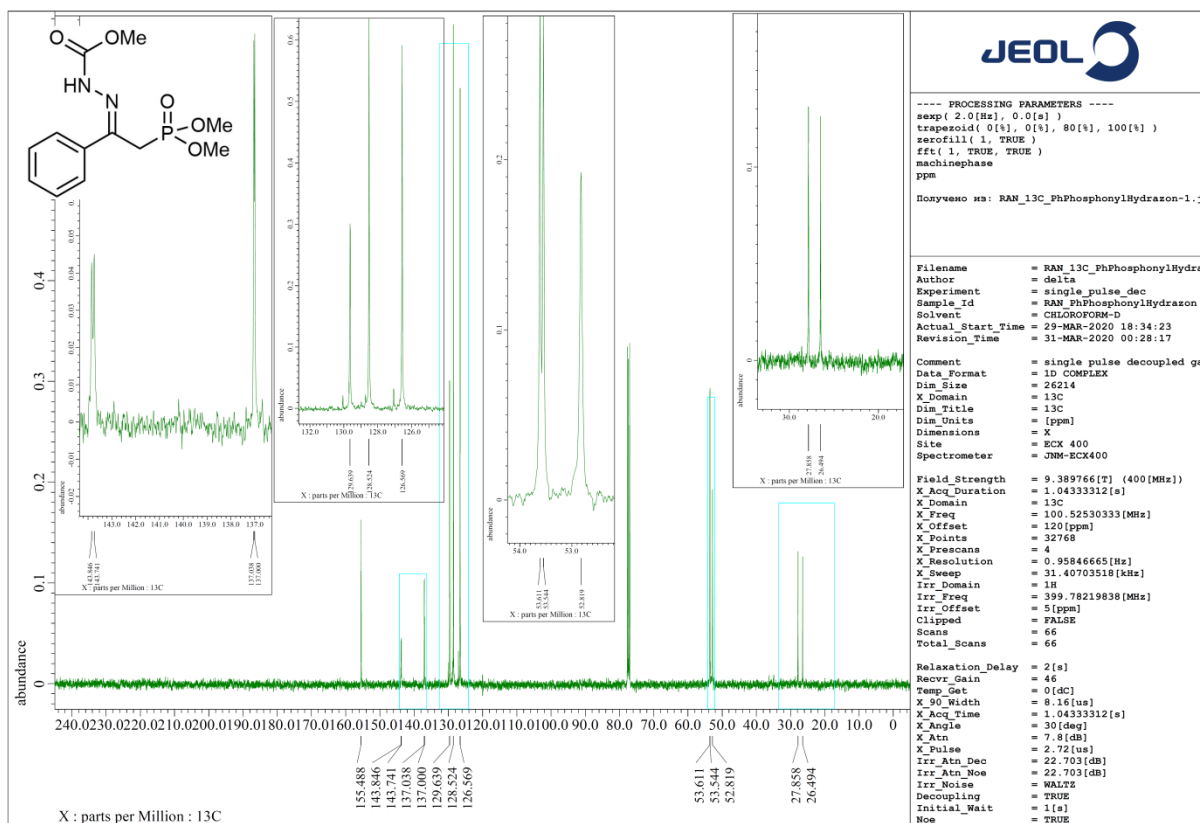

<sup>31</sup>P NMR spectra of methyl 2-[2-(dimethoxyphosphoryl)-1-phenylethylidene]hydrazine-1-carboxylate **Va** in  
CDCl<sub>3</sub>

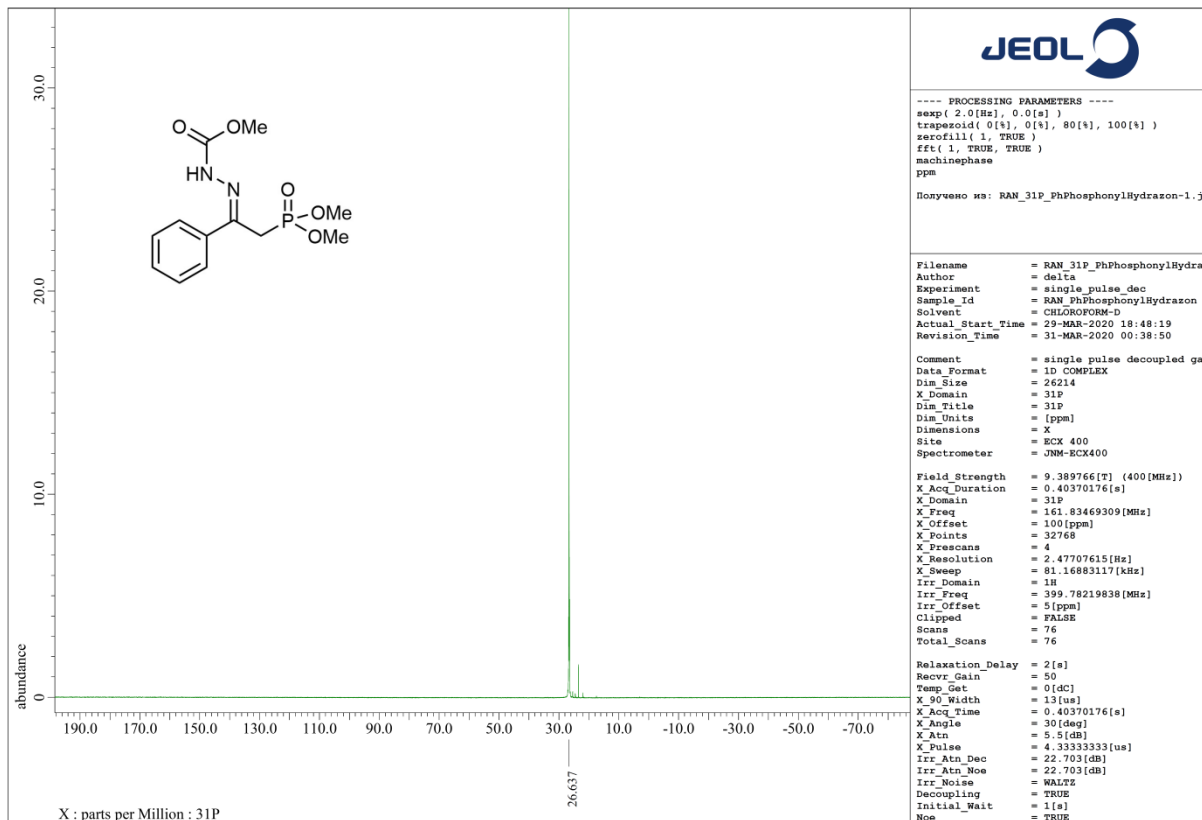



FTIR spectra of methyl 2-(2-(dimethoxyphosphoryl)-1-(4-methoxyphenyl)ethylidene)hydrazine-1-carboxylate **Vb**

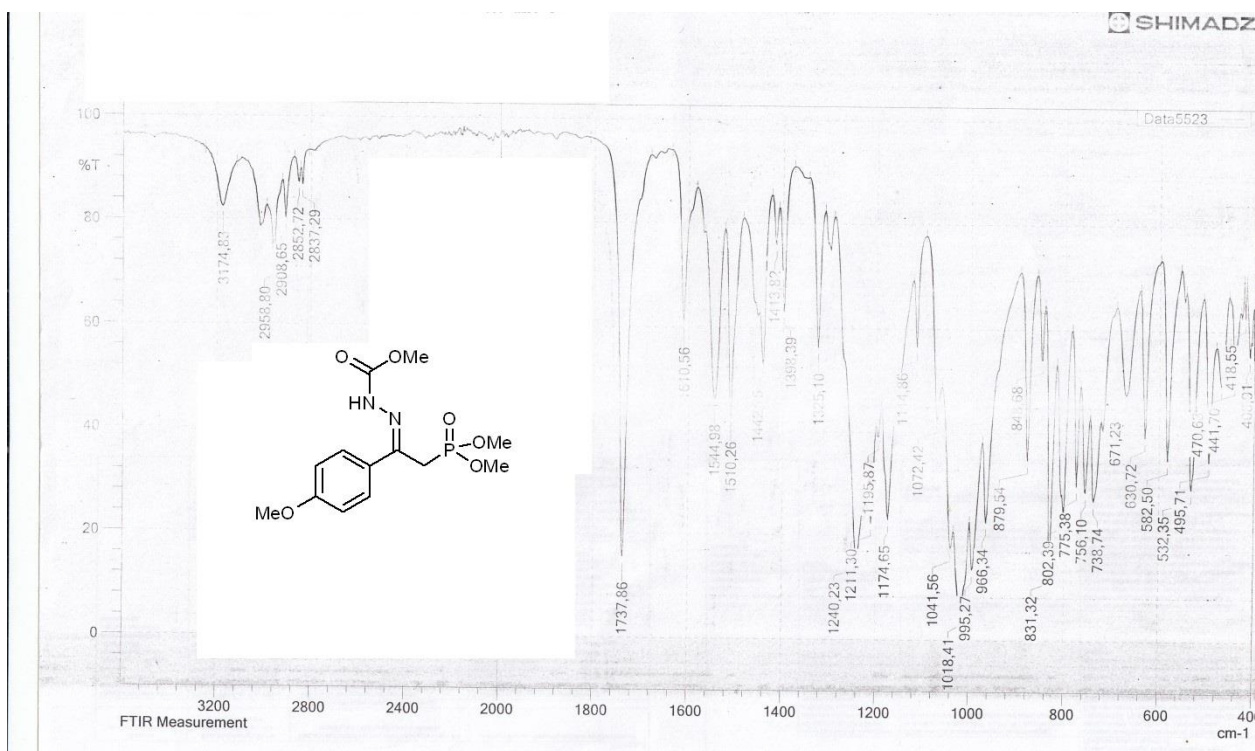

<sup>1</sup>H NMR spectra of methyl 2-(2-(dimethoxyphosphoryl)-1-(4-methoxyphenyl)ethylidene)hydrazine-1-carboxylate **Vb** in CDCl<sub>3</sub>

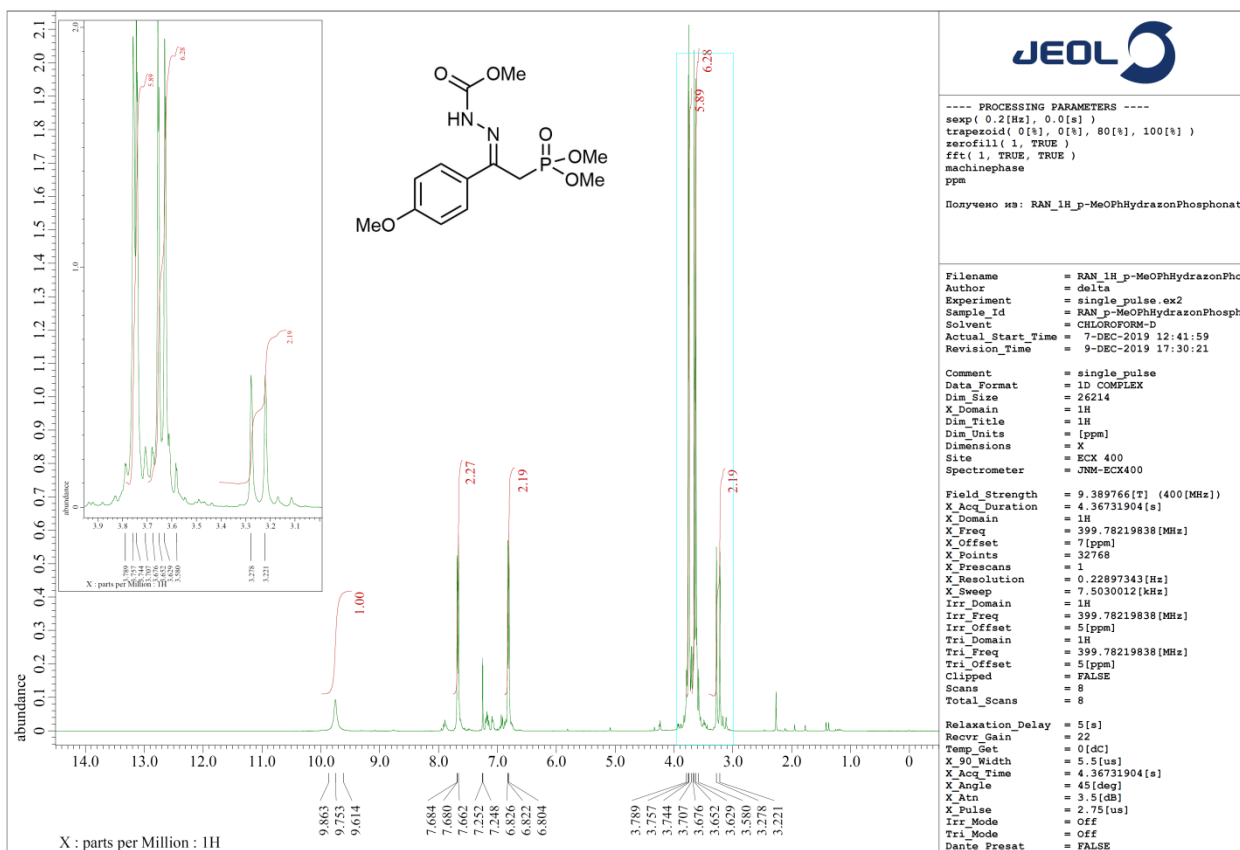



<sup>13</sup>C NMR spectra of methyl 2-(2-(dimethoxyphosphoryl)-1-(4-methoxyphenyl)ethylidene)hydrazine-1-carboxylate **Vb** in CDCl<sub>3</sub>

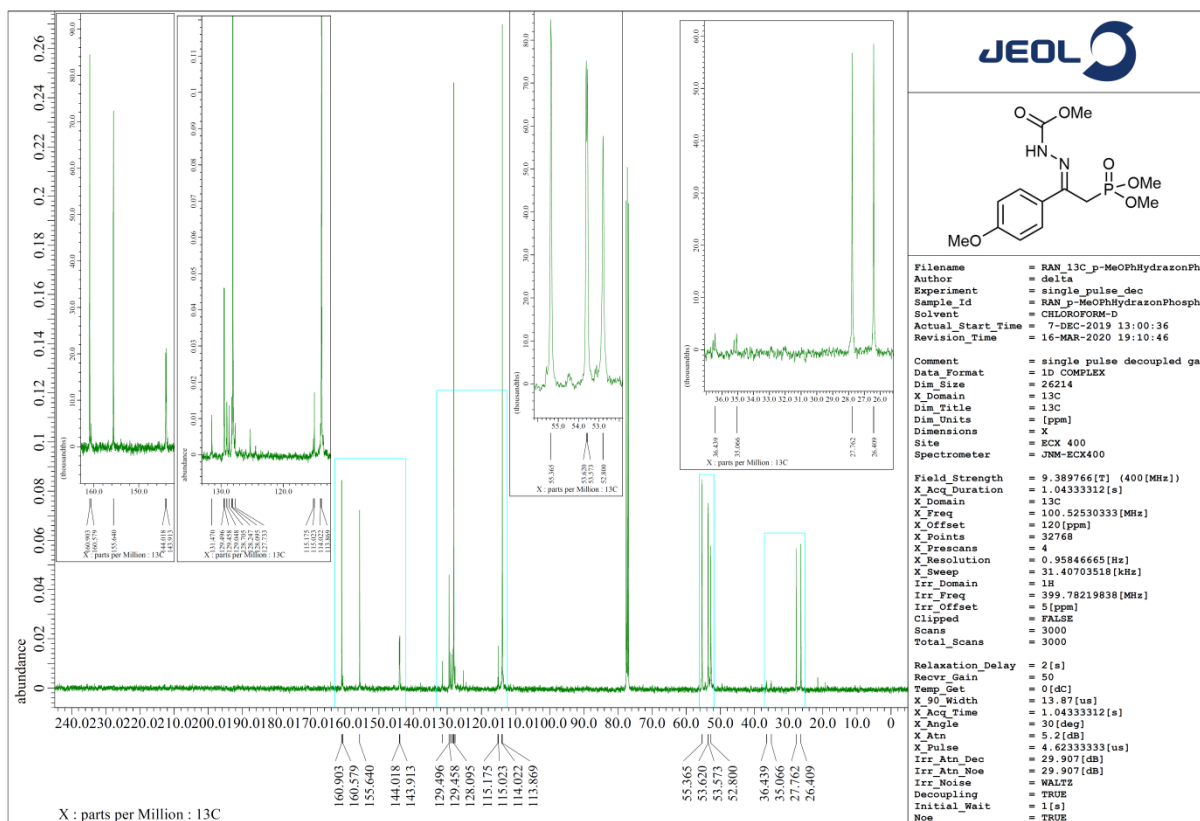

DEPT NMR spectra of methyl 2-(2-(dimethoxyphosphoryl)-1-(4-methoxyphenyl)ethylidene)hydrazine-1-carboxylate **Vb** in CDCl<sub>3</sub>

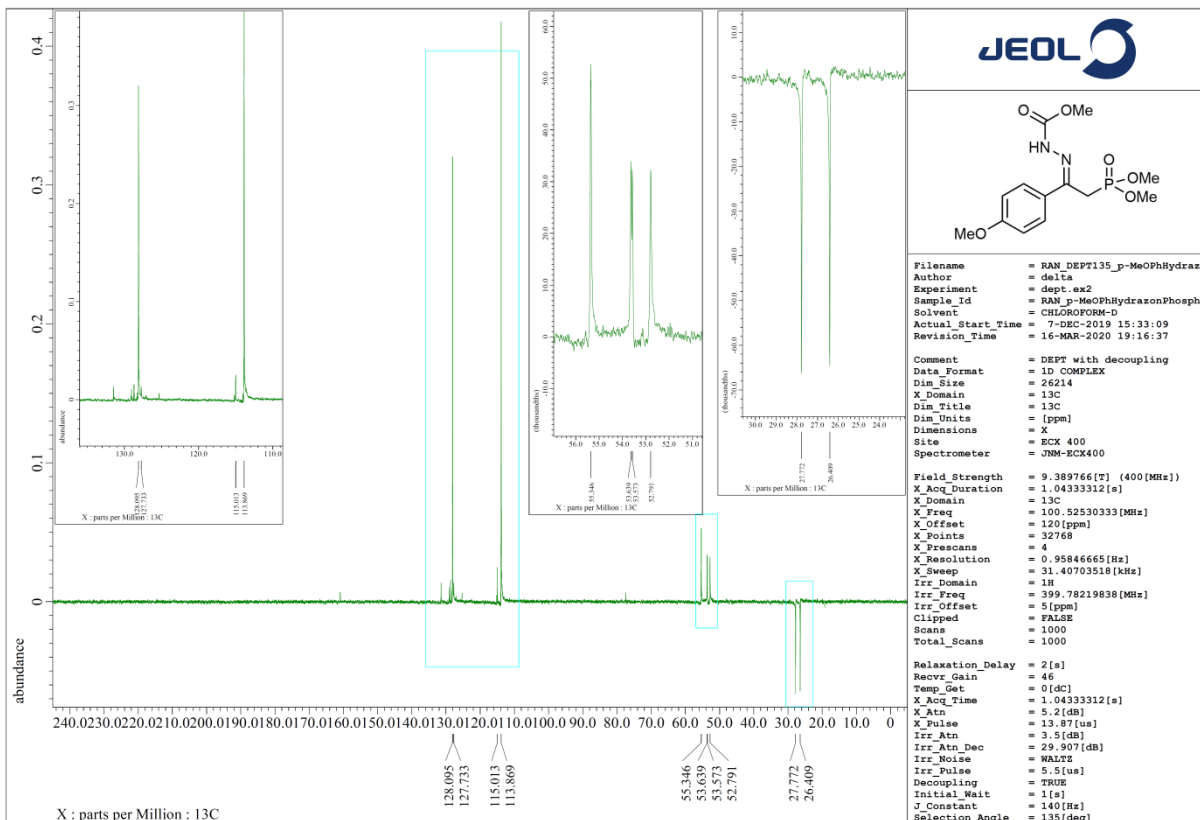



<sup>31</sup>P NMR spectra of methyl 2-(2-(dimethoxyphosphoryl)-1-(4-methoxyphenyl)ethylidene)hydrazine-1-carboxylate **Vb** in CDCl<sub>3</sub>

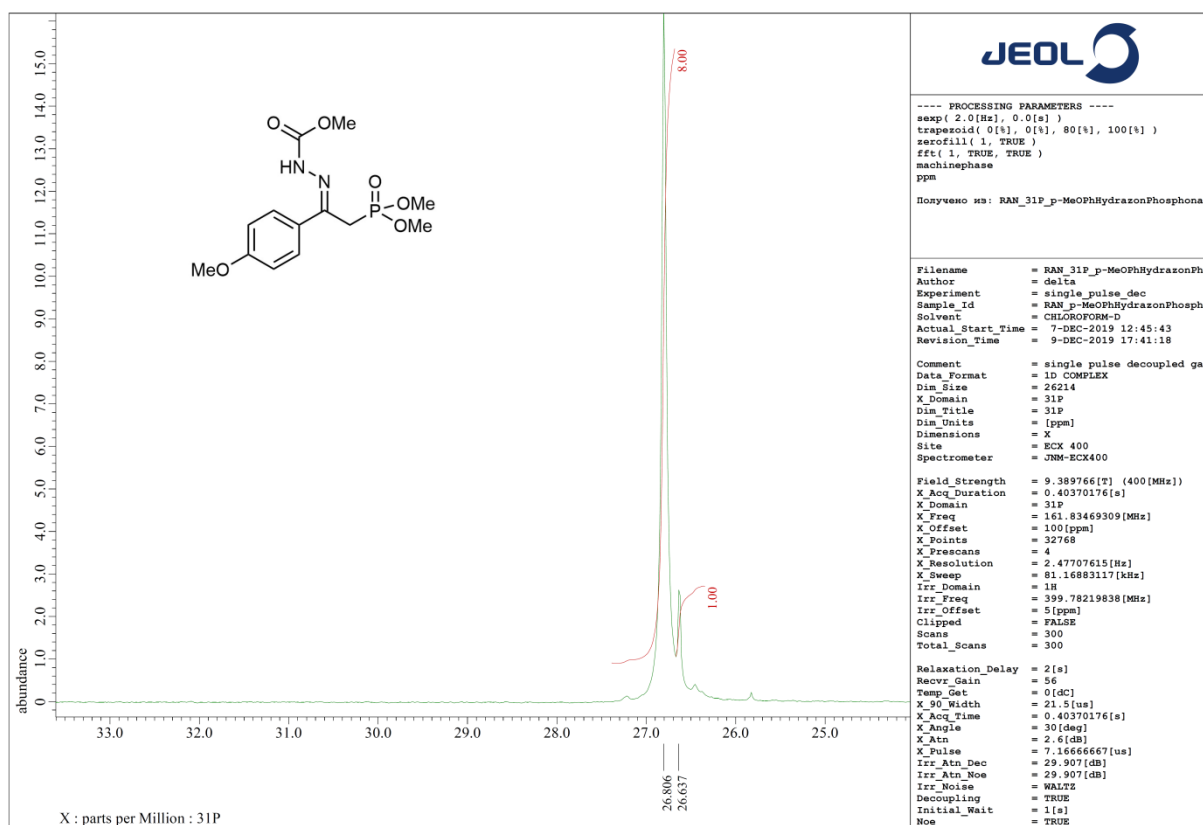

FTIR spectra of methyl 2-(2-(dimethoxyphosphoryl)-1-(3-methoxyphenyl)ethylidene)hydrazine-1-carboxylate **Vc**

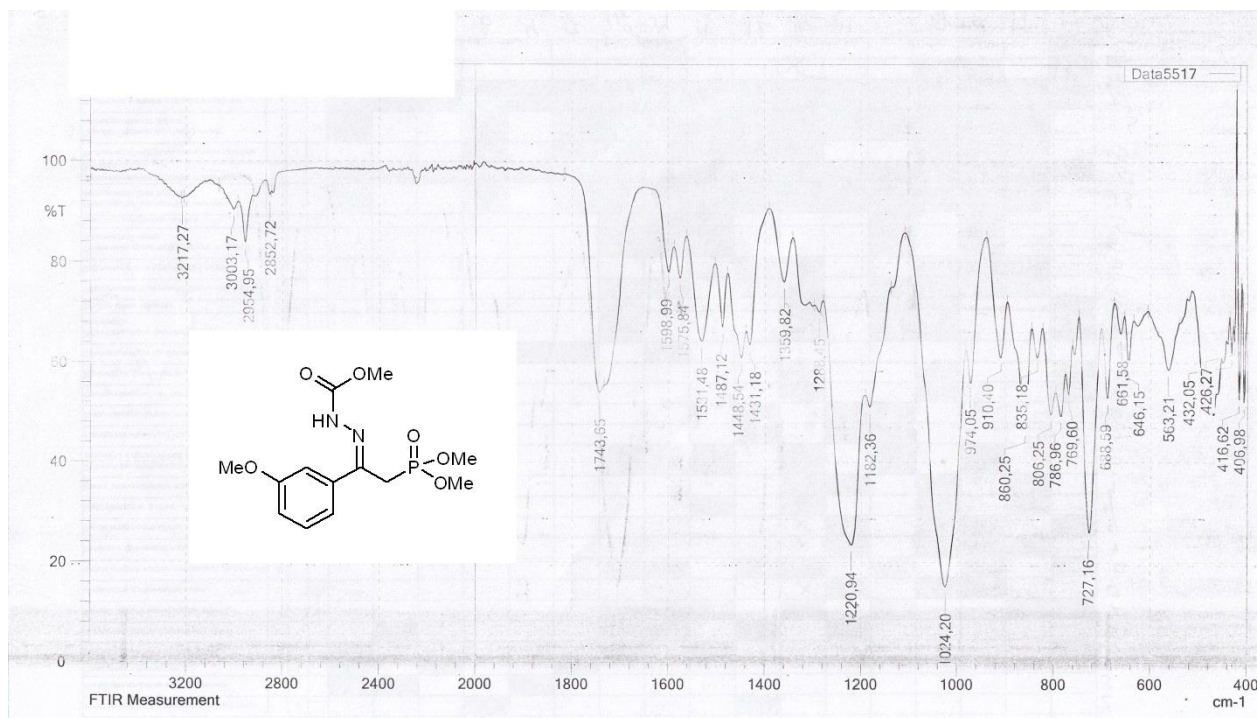



<sup>1</sup>H NMR spectra of methyl 2-(2-(dimethoxyphosphoryl)-1-(3-methoxyphenyl)ethylidene)hydrazine-1-carboxylate **Vc** in CDCl<sub>3</sub>

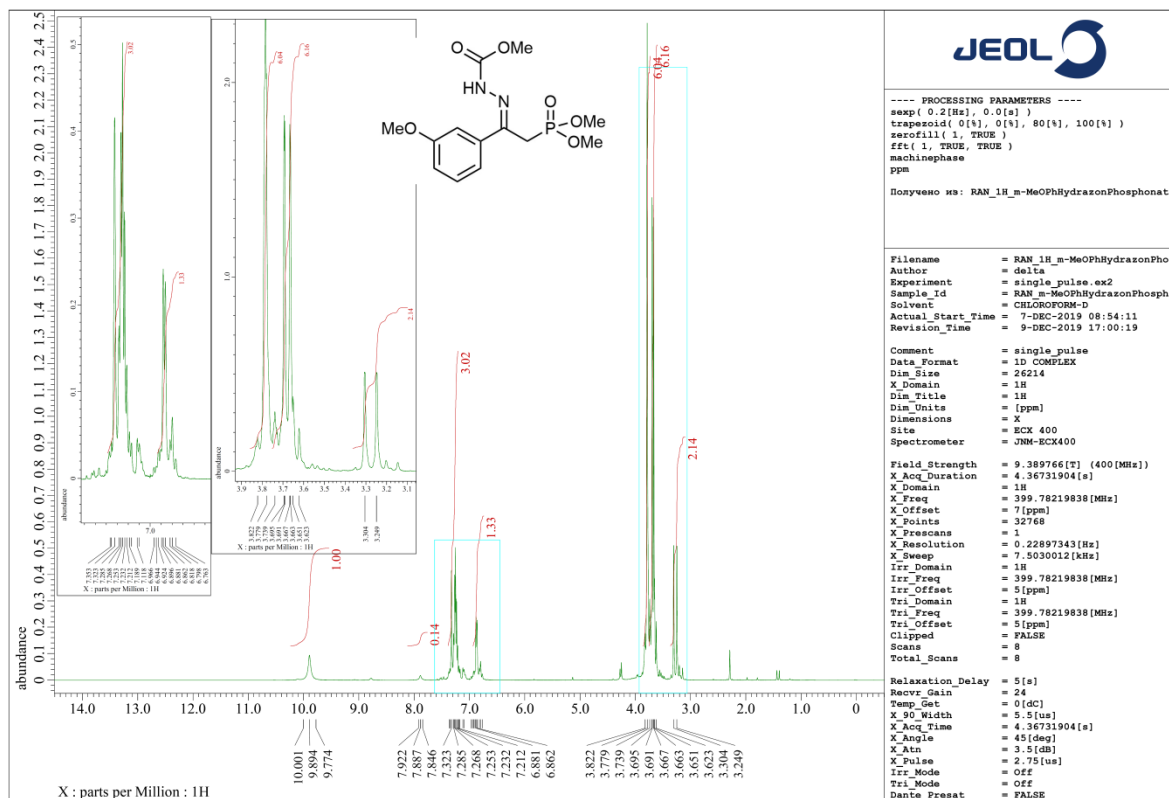

<sup>13</sup>C NMR spectra of methyl 2-(2-(dimethoxyphosphoryl)-1-(3-methoxyphenyl)ethylidene)hydrazine-1-carboxylate **Vc** in CDCl<sub>3</sub>

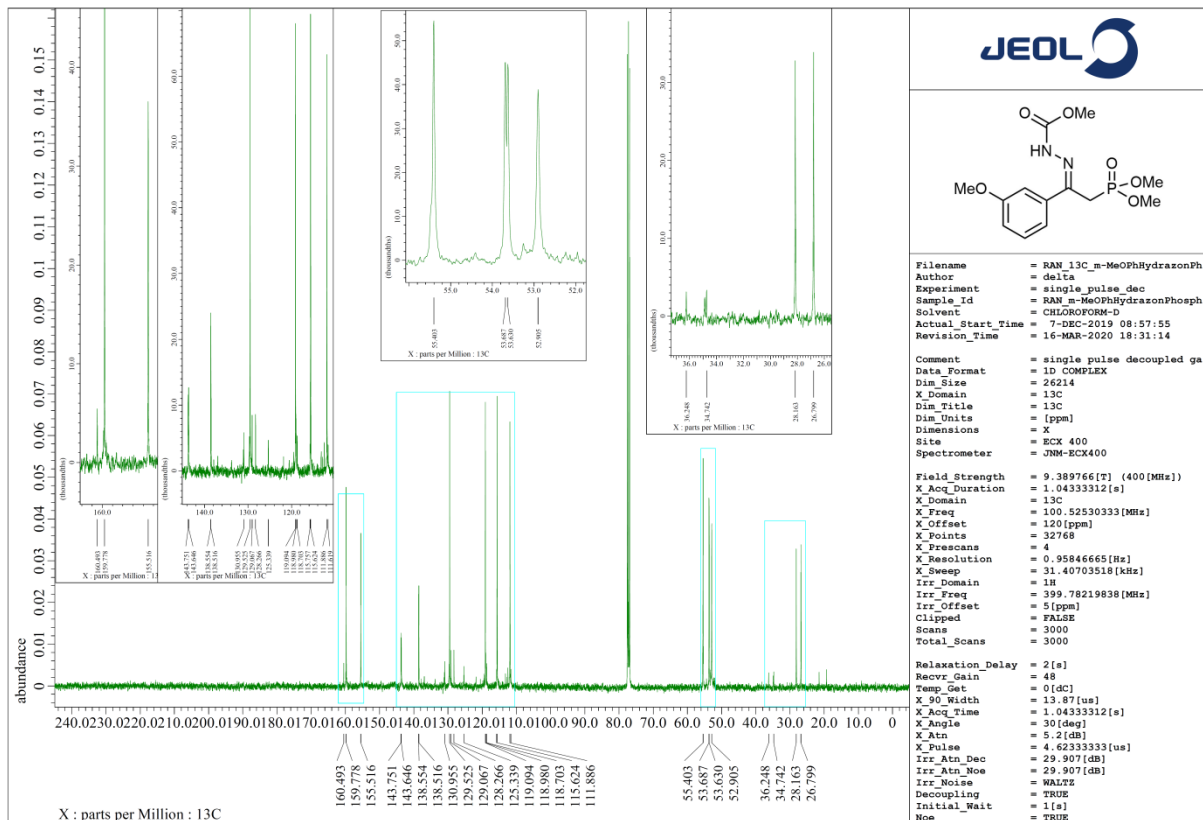



DEPT NMR spectra of methyl 2-(2-(dimethoxyphosphoryl)-1-(3-methoxyphenyl)ethylidene)hydrazine-1-carboxylate **Vc** in CDCl<sub>3</sub>

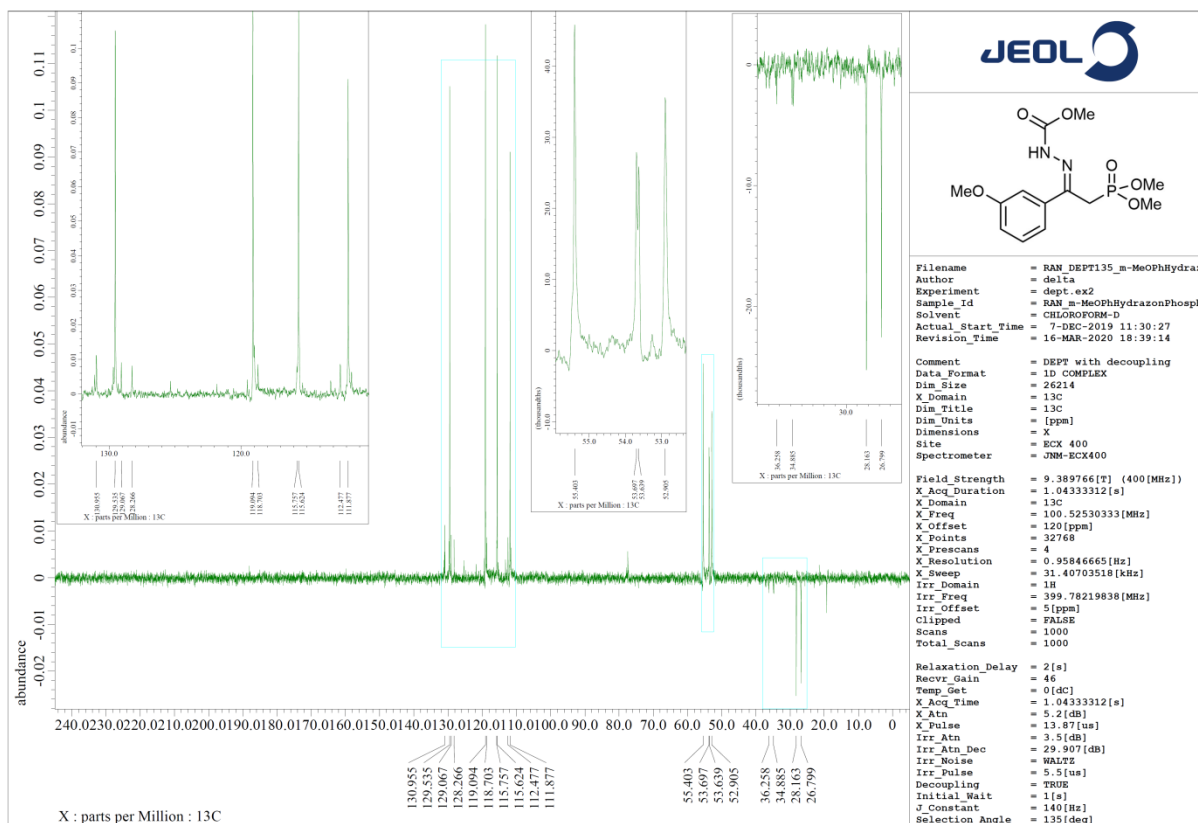

<sup>31</sup>P NMR spectra of methyl 2-(2-(dimethoxyphosphoryl)-1-(3-methoxyphenyl)ethylidene)hydrazine-1-carboxylate **Vc** in CDCl<sub>3</sub>

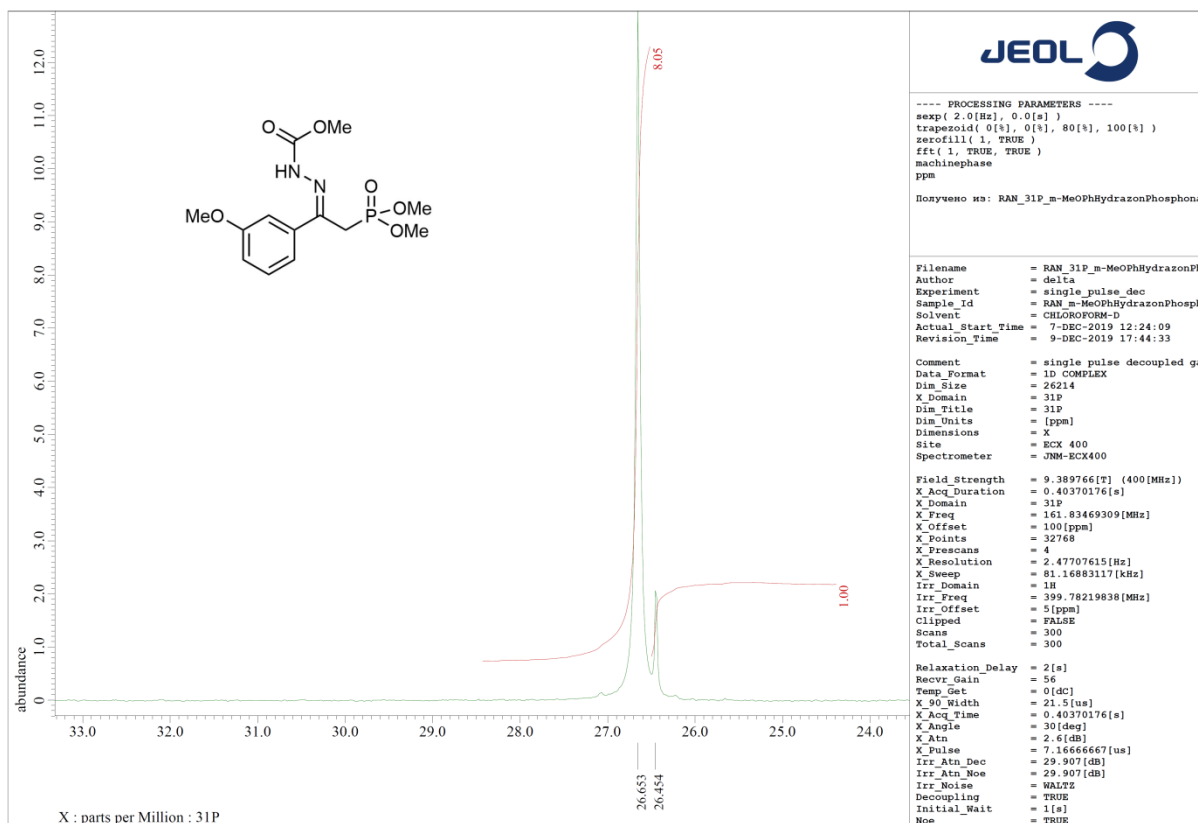



FTIR spectra of methyl 2-(2-(dimethoxyphosphoryl)-1-(2-methoxyphenyl)ethylidene)hydrazine-1-carboxylate **Vd**

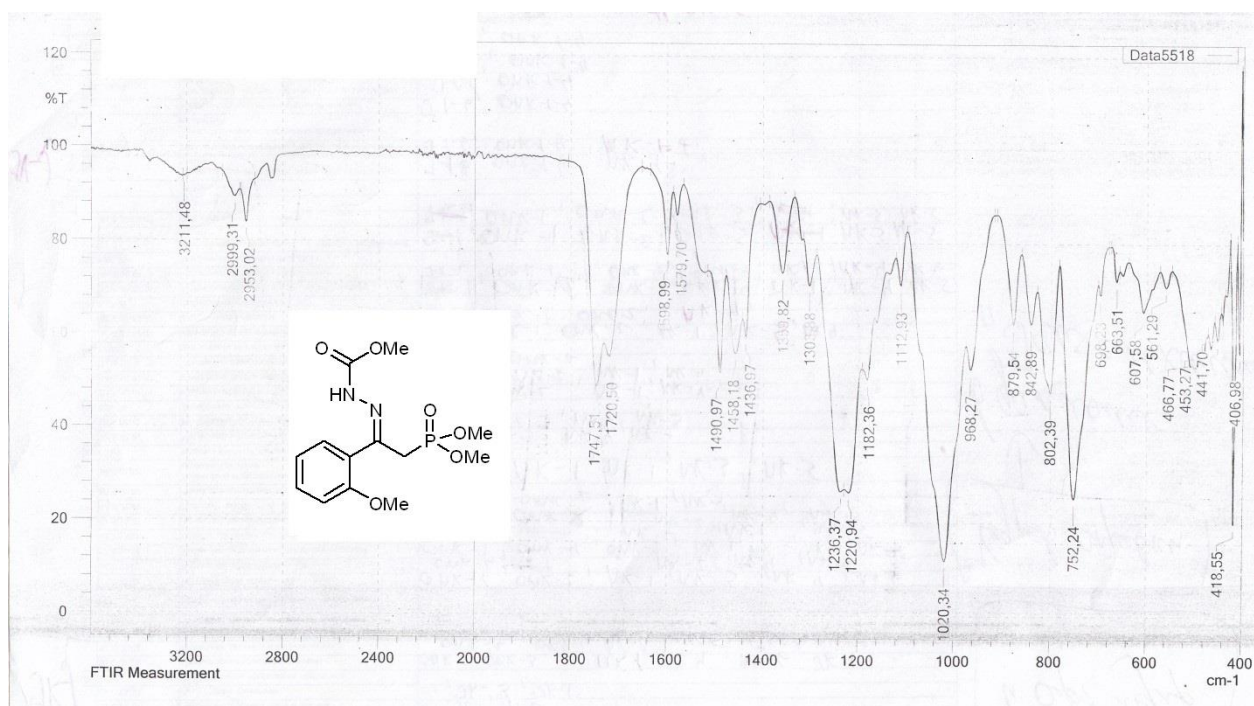

<sup>1</sup>H NMR spectra of methyl 2-(2-(dimethoxyphosphoryl)-1-(2-methoxyphenyl)ethylidene)hydrazine-1-carboxylate **Vd** in CDCl<sub>3</sub>

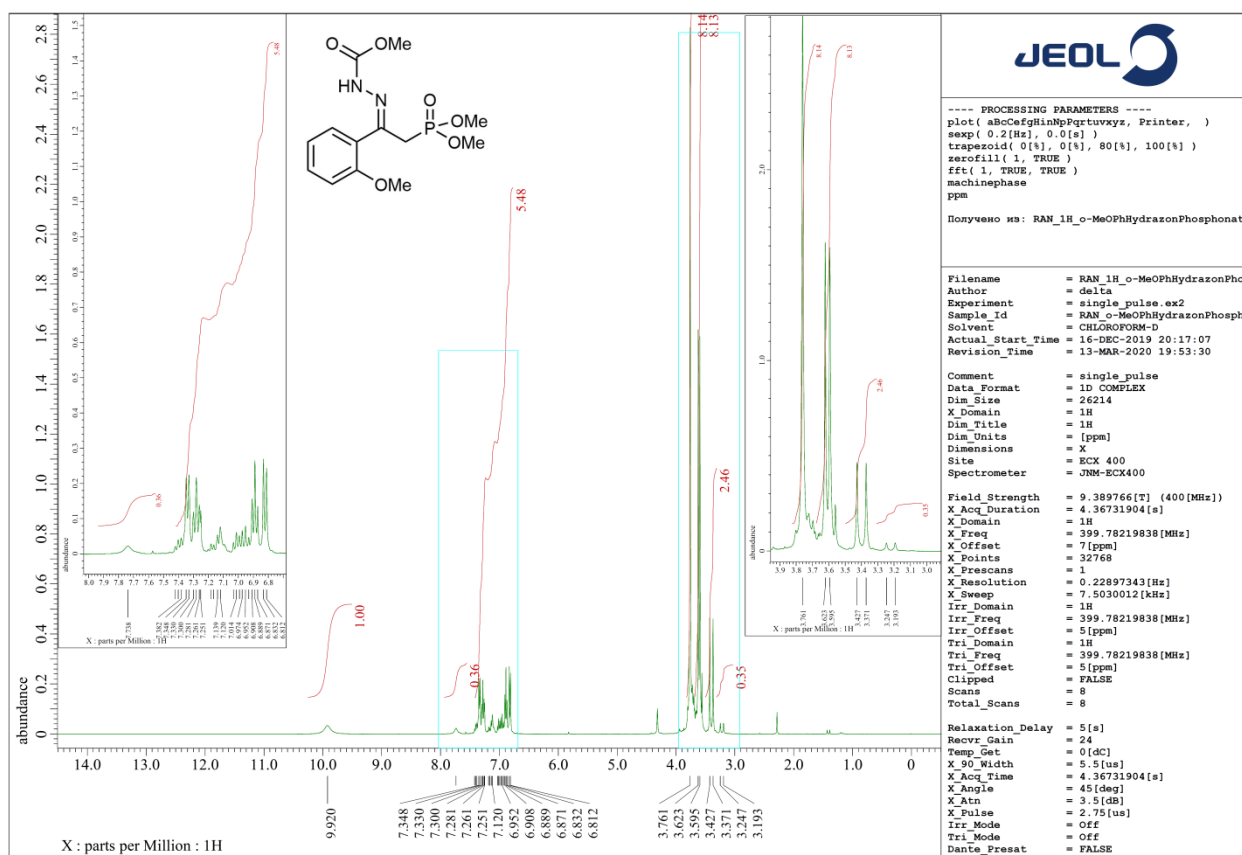



<sup>13</sup>C NMR spectra of methyl 2-(2-(dimethoxyphosphoryl)-1-(2-methoxyphenyl)ethylidene)hydrazine-1-carboxylate **Vd** in CDCl<sub>3</sub>

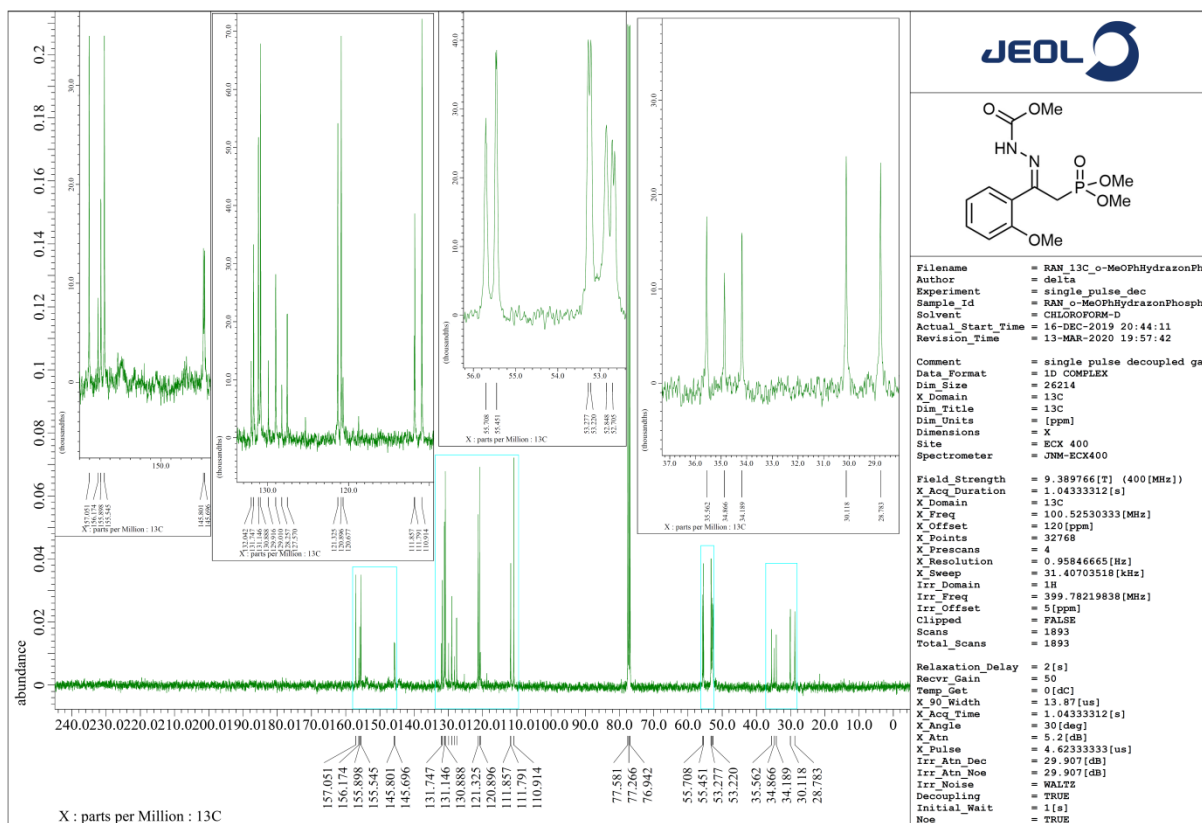

DEPT NMR spectra of methyl 2-(2-(dimethoxyphosphoryl)-1-(2-methoxyphenyl)ethylidene)hydrazine-1-carboxylate **Vd** in CDCl<sub>3</sub>

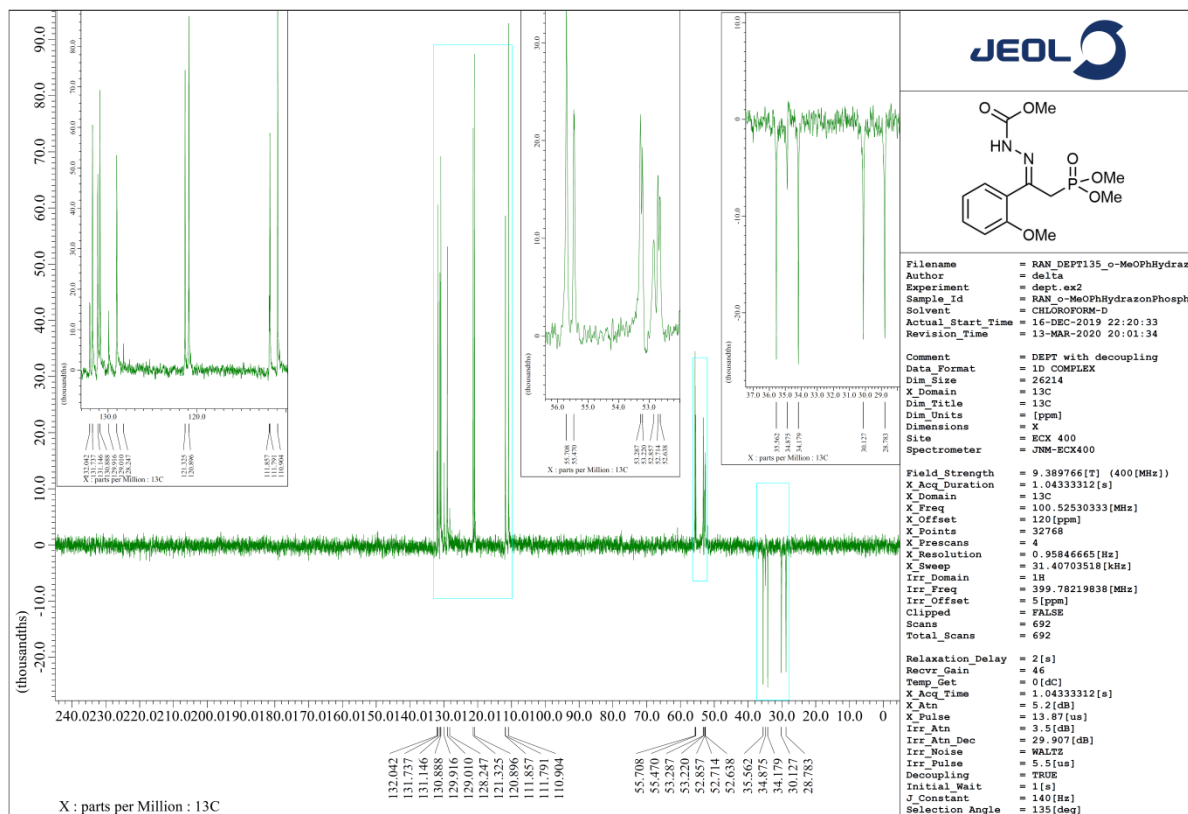



<sup>31</sup>P NMR spectra of methyl 2-(2-(dimethoxyphosphoryl)-1-(2-methoxyphenyl)ethylidene)hydrazine-1-carboxylate **Vd** in CDCl<sub>3</sub>

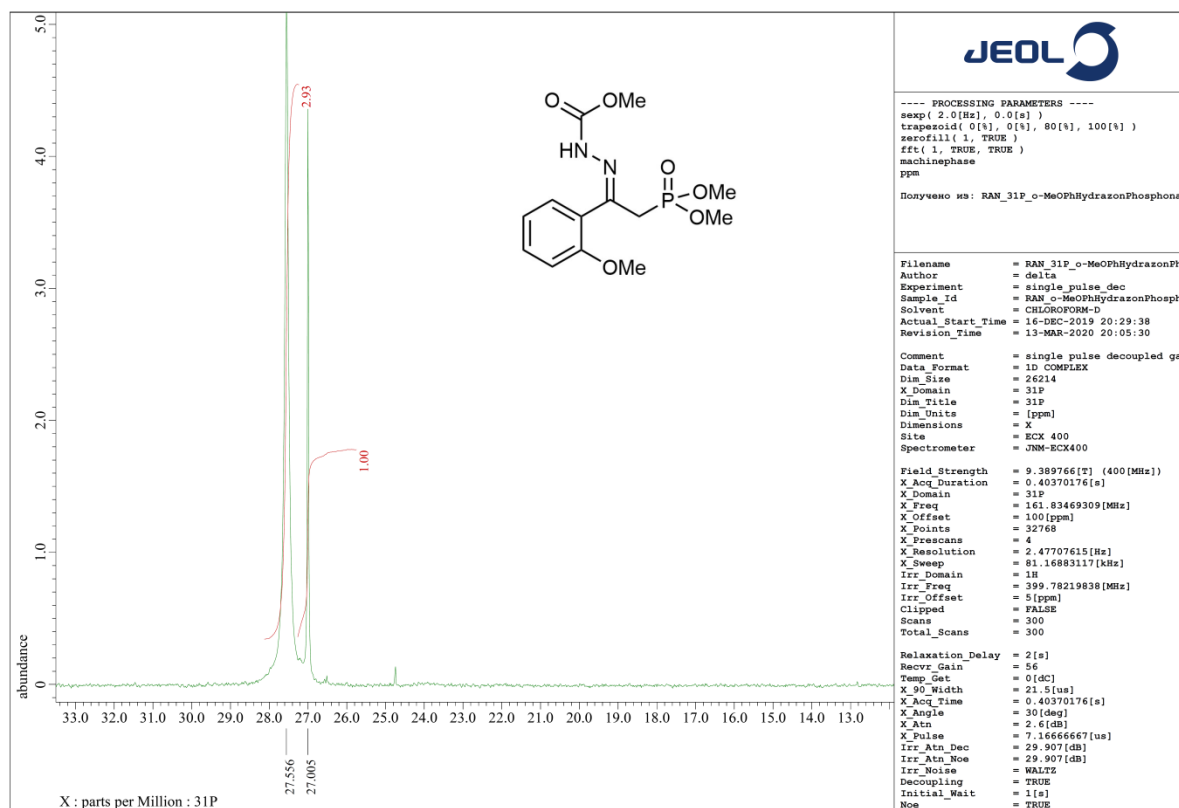

FTIR spectra of methyl 2-(1-(adamantan-1-yl)-2-(dimethoxyphosphoryl)ethylidene)hydrazine-1-carboxylate

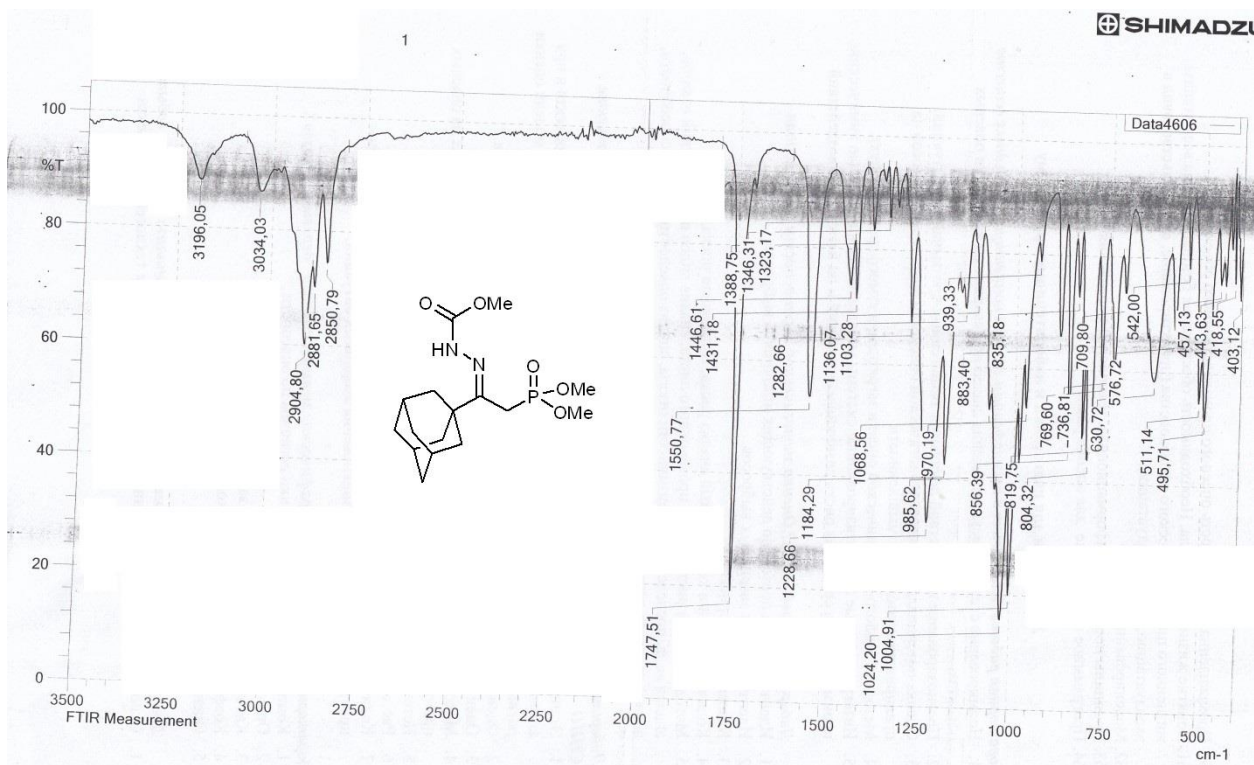



<sup>1</sup>H NMR spectra of methyl 2-(1-(adamantan-1-yl)-2-(dimethoxyphosphoryl)ethylidene)hydrazine-1-carboxylate in CDCl<sub>3</sub>

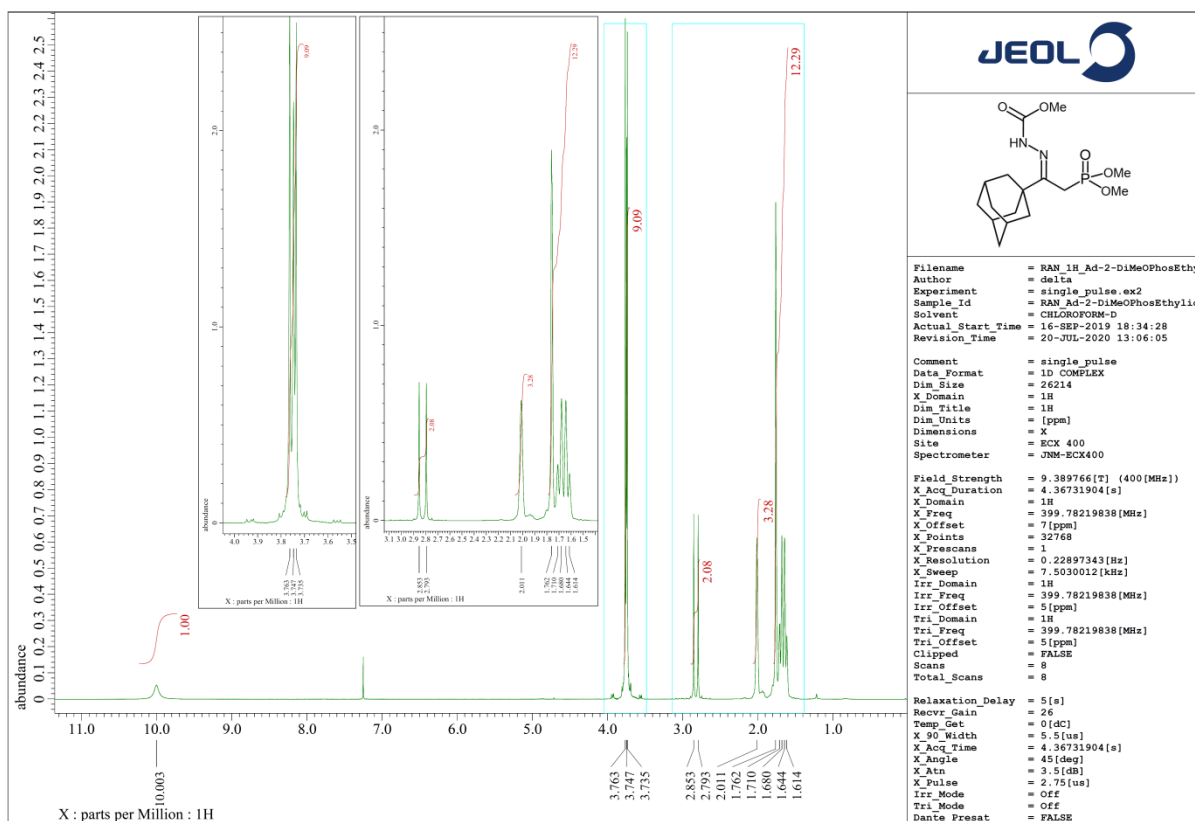

<sup>13</sup>C NMR spectra of methyl 2-(1-(adamantan-1-yl)-2-(dimethoxyphosphoryl)ethylidene)hydrazine-1-carboxylate in CDCl<sub>3</sub>

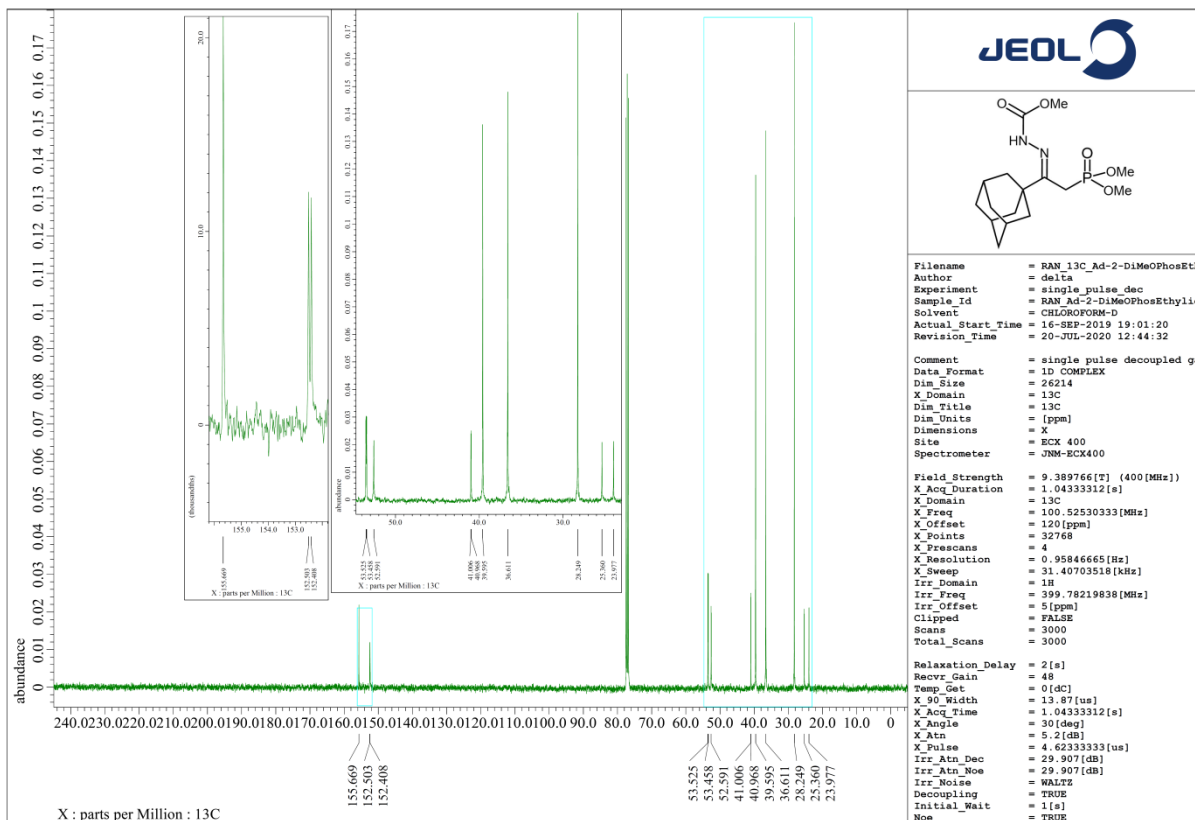



JEOL

Chemical structure of RAN\_DEPT135\_Ad-2-DiMeOPhosEthylidene:

COC(=O)N=C(C1C2CC3CCC(CC2)C1C3)CP(=O)(OC)OC

---- PROCESSING PARAMETERS ----  
sssq( 2.0[Hz], 0.5[s] )  
trapezoid( 0[%], 0[%], 80[%], 100[%] )  
zerofill( 1, TRUE )  
fft( 1, TRUE, TRUE )  
machinephase  
ppm

Получено из: RAN\_DEPT135\_Ad-2-DiMeOPhosEthylidene

Filename = RAN\_DEPT135\_Ad-2-DiMeOPho  
Author = delta  
Experiment = dept.ex2  
Sample\_Id = RAN\_Ad-2-DiMeOPhosEthylid  
Solvent = CHLOROFORM-D  
Actual\_Start\_Time = 16-SEP-2019 21:33:50  
Revision\_Time = 20-JUL-2020 12:52:37

Comment = DEPT with decoupling  
Data\_Format = 1D COMPLEX  
Dim\_Size = 26214  
X\_Domain = 13C  
Dim\_Title = 13C  
Dim\_Units = [ppm]  
Dimensions = X  
Site = ECK 400  
Spectrometer = JNM-ECK400

Field Strength = 9.389766[T] (400[Mhz])  
X\_AcqDuration = 1.04333312[s]  
X\_Domain = 13C  
X\_Freq = 100.52530333[Mhz]  
X\_Offset = 12.6[ppm]  
X\_Points = 32768  
X\_Prescans = 4  
X\_Resolution = 0.95846665[Hz]  
X\_Sweep = 31.40703518[KHz]  
Irr\_Domain = 1H  
Irr\_Freq = 399.78219838[Mhz]  
Irr\_Offset = 5[ppm]  
Clipped = FALSE  
Scans = 593  
Total\_Scans = 593

Relaxation\_Delay = 2[s]  
Recvr\_Gain = 46  
Temp\_Get = 0[deg]  
X\_AcqTime = 1.04333312[s]  
X\_Attn = 5.2[db]  
X\_Pulse = 13.97[us]  
Irr\_Attn = 3.6[db]  
Irr\_Attn\_Dec = 29.907[db]  
Irr\_Noise = WALTZ  
Irr\_Pulse = 5.5[us]  
Decoupling = TRUE  
Initial\_Wait = 1[s]  
J\_Constant = 140[Hz]  
Selection\_Angle = 138[deg]

Chemical structure: COC(=O)N=C(C12CC3CC4CC5CC6CC7CC8CC9CC10CC11CC12CC13CC14CC15CC16CC17CC18CC19CC20CC21CC22CC23CC24CC25CC26CC27CC28CC29CC30CC31CC32CC33CC34CC35CC36CC37CC38CC39CC40CC41CC42CC43CC44CC45CC46CC47CC48CC49CC50CC51CC52CC53CC54CC55CC56CC57CC58CC59CC60CC61CC62CC63CC64CC65CC66CC67CC68CC69CC70CC71CC72CC73CC74CC75CC76CC77CC78CC79CC80CC81CC82CC83CC84CC85CC86CC87CC88CC89CC90CC91CC92CC93CC94CC95CC96CC97CC98CC99CC100CC101CC102CC103CC104CC105CC106CC107CC108CC109CC110CC111CC112CC113CC114CC115CC116CC117CC118CC119CC120CC121CC122CC123CC124CC125CC126CC127CC128CC129CC130CC131CC132CC133CC134CC135CC136CC137CC138CC139CC140CC141CC142CC143CC144CC145CC146CC147CC148CC149CC150CC151CC152CC153CC154CC155CC156CC157CC158CC159CC160CC161CC162CC163CC164CC165CC166CC167CC168CC169CC170CC171CC172CC173CC174CC175CC176CC177CC178CC179CC180CC181CC182CC183CC184CC185CC186CC187CC188CC189CC190CC191CC192CC193CC194CC195CC196CC197CC198CC199CC200CC201CC202CC203CC204CC205CC206CC207CC208CC209CC210CC211CC212CC213CC214CC215CC216CC217CC218CC219CC220CC221CC222CC223CC224CC225CC226CC227CC228CC229CC230CC231CC232CC233CC234CC235CC236CC237CC238CC239CC240CC241CC242CC243CC244CC245CC246CC247CC248CC249CC250CC251CC252CC253CC254CC255CC256CC257CC258CC259CC260CC261CC262CC263CC264CC265CC266CC267CC268CC269CC270CC271CC272CC273CC274CC275CC276CC277CC278CC279CC280CC281CC282CC283CC284CC285CC286CC287CC288CC289CC290CC291CC292CC293CC294CC295CC296CC297CC298CC299CC300CC301CC302CC303CC304CC305CC306CC307CC308CC309CC310CC311CC312CC313CC314CC315CC316CC317CC318CC319CC320CC321CC322CC323CC324CC325CC326CC327CC328CC329CC330CC331CC332CC333CC334CC335CC336CC337CC338CC339CC340CC341CC342CC343CC344CC345CC346CC347CC348CC349CC350CC351CC352CC353CC354CC355CC356CC357CC358CC359CC360CC361CC362CC363CC364CC365CC366CC367CC368CC369CC370CC371CC372CC373CC374CC375CC376CC377CC378CC379CC380CC381CC382CC383CC384CC385CC386CC387CC388CC389CC390CC391CC392CC393CC394CC395CC396CC397CC398CC399CC400CC401CC402CC403CC404CC405CC406CC407CC408CC409CC410CC411CC412CC413CC414CC415CC416CC417CC418CC419CC420CC421CC422CC423CC424CC425CC426CC427CC428CC429CC430CC431CC432CC433CC434CC435CC436CC437CC438CC439CC440CC441CC442CC443CC444CC445CC446CC447CC448CC449CC450CC451CC452CC453CC454CC455CC456CC457CC458CC459CC460CC461CC462CC463CC464CC465CC466CC467CC468CC469CC470CC471CC472CC473CC474CC475CC476CC477CC478CC479CC480CC481CC482CC483CC484CC485CC486CC487CC488CC489CC490CC491CC492CC493CC494CC495CC496CC497CC498CC499CC500CC501CC502CC503CC504CC505CC506CC507CC508CC509CC510CC511CC512CC513CC514CC515CC516CC517CC518CC519CC520CC521CC522CC523CC524CC525CC526CC527CC528CC529CC530CC531CC532CC533CC534CC535CC536CC537CC538CC539CC540CC541CC542CC543CC544CC545CC546CC547CC548CC549CC550CC551CC552CC553CC554CC555CC556CC557CC558CC559CC560CC561CC562CC563CC564CC565CC566CC567CC568CC569CC570CC571CC572CC573CC574CC575CC576CC577CC578CC579CC580CC581CC582CC583CC584CC585CC586CC587CC588CC589CC590CC591CC592CC593CC594CC595CC596CC597CC598CC599CC600CC601CC602CC603CC604CC605CC606CC607CC608CC609CC610CC611CC612CC613CC614CC615CC616CC617CC618CC619CC620CC621CC622CC623CC624CC625CC626CC627CC628CC629CC630CC631CC632CC633CC634CC635CC636CC637CC638CC639CC640CC641CC642CC643CC644CC645CC646CC647CC648CC649CC650CC651CC652CC653CC654CC655CC656CC657CC658CC659CC660CC661CC662CC663CC664CC665CC666CC667CC668CC669CC670CC671CC672CC673CC674CC675CC676CC677CC678CC679CC680CC681CC682CC683CC684CC685CC686CC687CC688CC689CC690CC691CC692CC693CC694CC695CC696CC697CC698CC699CC700CC701CC702CC703CC704CC705CC706CC707CC708CC709CC710CC711CC712CC713CC714CC715CC716CC717CC718CC719CC720CC721CC722CC723CC724CC725CC726CC727CC728CC729CC730CC731CC732CC733CC734CC735CC736CC737CC738CC739CC740CC741CC742CC743CC744CC745CC746CC747CC748CC749CC750CC751CC752CC753CC754CC755CC756CC757CC758CC759CC760CC761CC762CC763CC764CC765CC766CC767CC768CC769CC770CC771CC772CC773CC774CC775CC776CC777CC778CC779CC780CC781CC782CC783CC784CC785CC786CC787CC788CC789CC790CC791CC792CC793CC794CC795CC796CC797CC798CC799CC800CC801CC802CC803CC804CC805CC806CC807CC808CC809CC810CC811CC812CC813CC814CC815CC816CC817CC818CC819CC820CC821CC822CC823CC824CC825CC826CC827CC828CC829CC830CC831CC832CC833CC834CC835CC836CC837CC838CC839CC840CC841CC842CC843CC844CC845CC846CC847CC848CC849CC850CC851CC852CC853CC854CC855CC856CC857CC858CC859CC860CC861CC862CC863CC864CC865CC866CC867CC868CC869CC870CC871CC872CC873CC874CC875CC876CC877CC878CC879CC880CC881CC882CC883CC884CC885CC886CC887CC888CC889CC890CC891CC892CC893CC894CC895CC896CC897CC898CC899CC900CC901CC902CC903CC904CC905CC906CC907CC908CC909CC910CC911CC912CC913CC914CC915CC916CC917CC918CC919CC920CC921CC922CC923CC924CC925CC926CC927CC928CC929CC930CC931CC932CC933CC934CC935CC936CC937CC938CC939CC940CC941CC942CC943CC944CC945CC946CC947CC948CC949CC950CC951CC952CC953CC954CC955CC956CC957CC958CC959CC960CC961CC962CC963CC964CC965CC966CC967CC968CC969CC970CC971CC972CC973CC974CC975CC976CC977CC978CC979CC980CC981CC982CC983CC984CC985CC986CC987CC988CC989CC990CC991CC992CC993CC994CC995CC996CC997CC998CC999CC1000CC1001CC1002CC1003CC1004CC1005CC1006CC1007CC10



<sup>1</sup>H NMR spectra of dimethyl (2-oxo-2-phenylethyl)phosphonate **Vla** in CDCl<sub>3</sub>

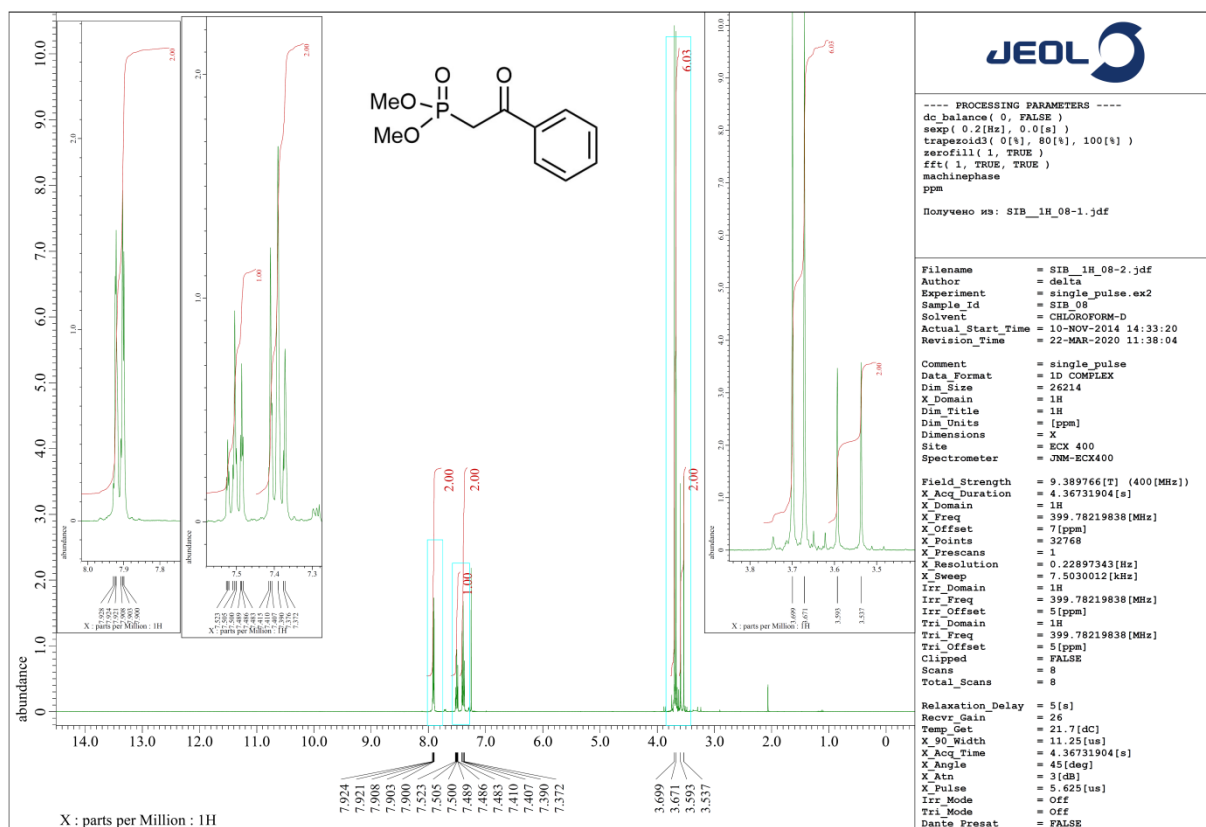

<sup>13</sup>C NMR spectra of dimethyl (2-oxo-2-phenylethyl)phosphonate **Vla** in CDCl<sub>3</sub>

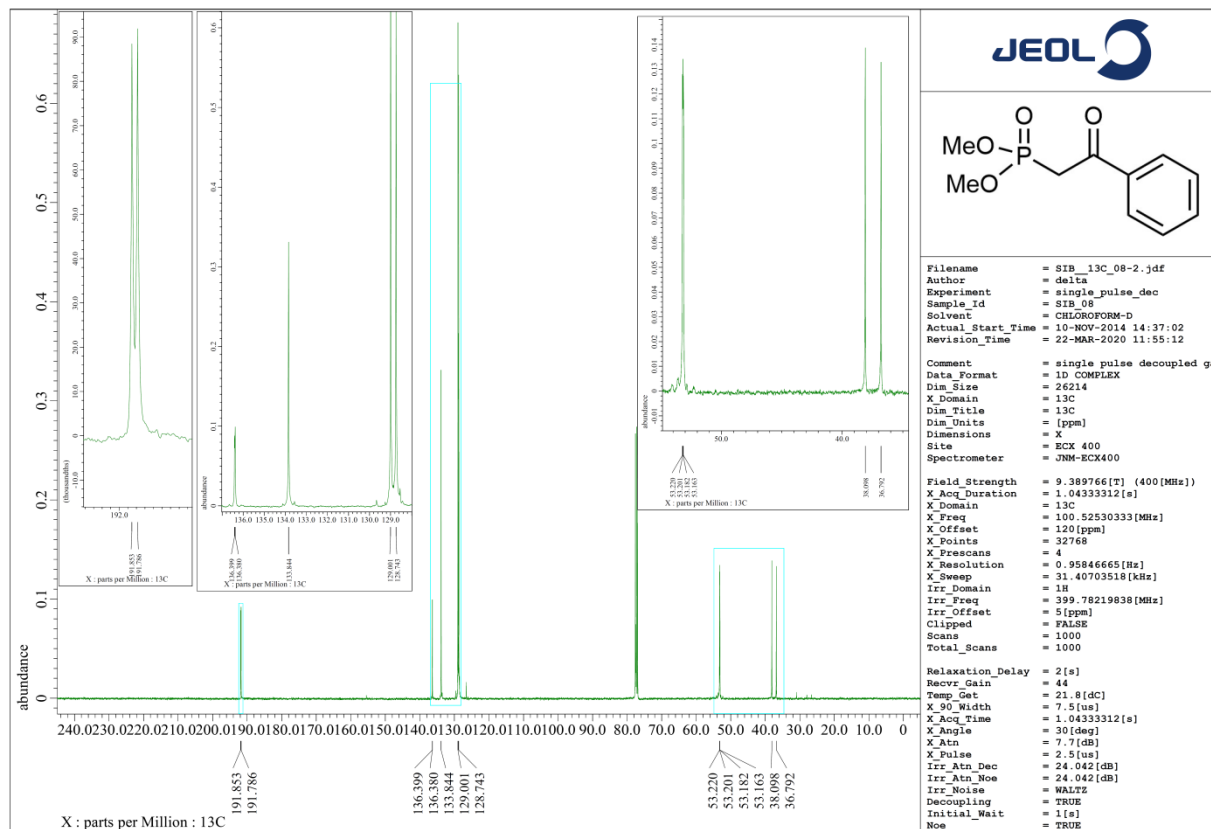



<sup>31</sup>P NMR spectra of dimethyl (2-oxo-2-phenylethyl)phosphonate **Vla** in CDCl<sub>3</sub>

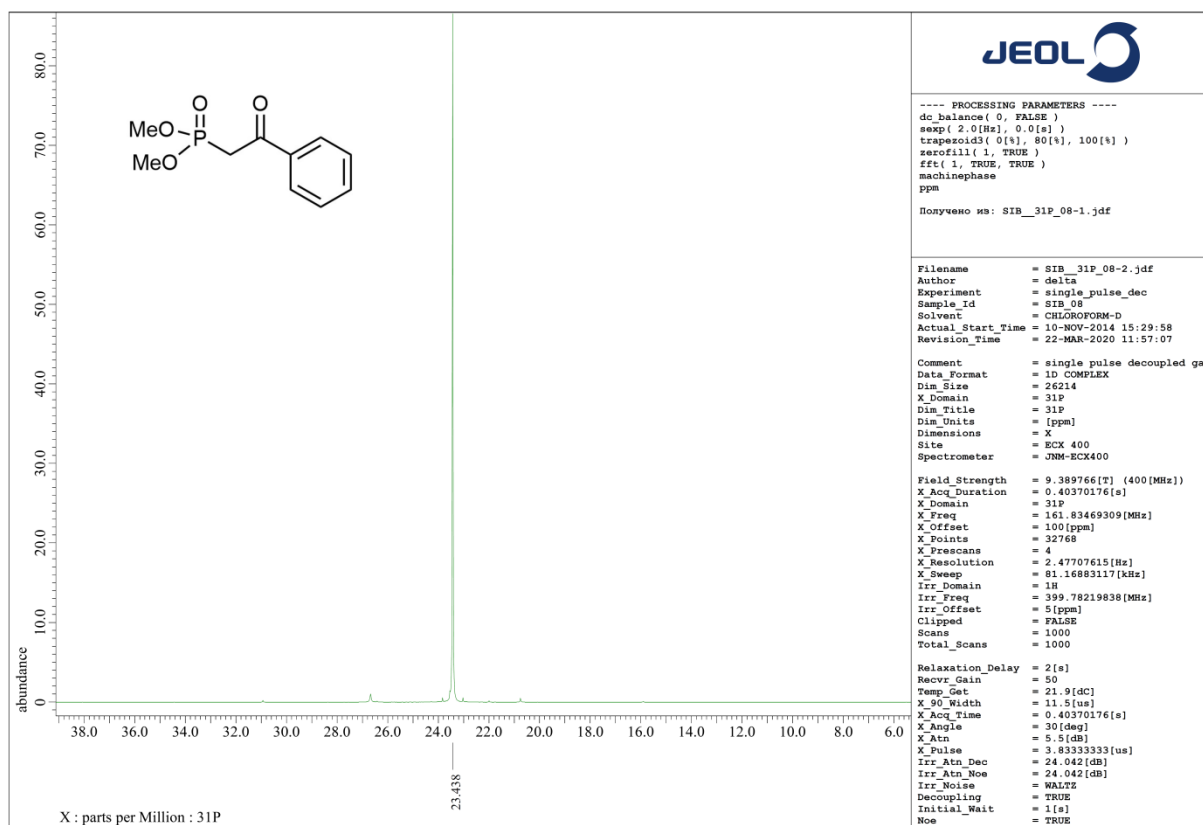

FTIR spectra of dimethyl [2-(4-methoxyphenyl)-2-oxoethyl]phosphonate **Vlb**

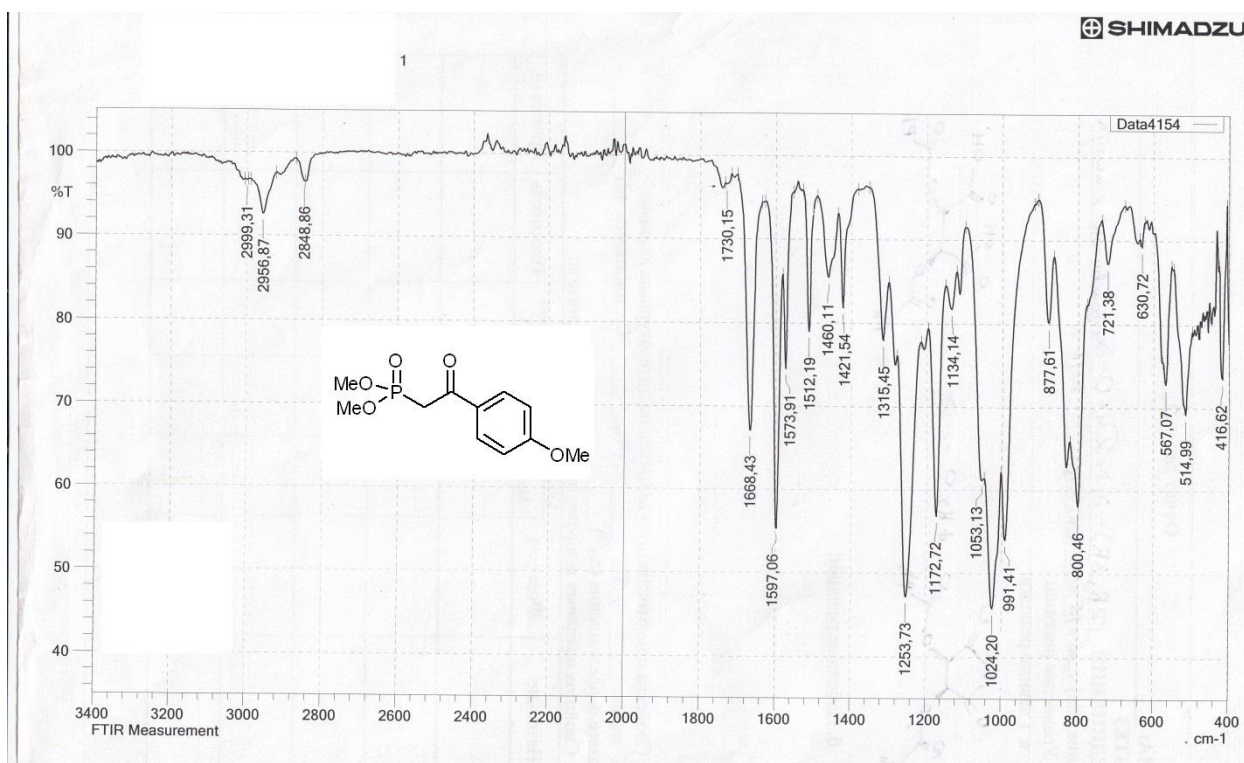



<sup>1</sup>H NMR spectra of dimethyl [2-(4-methoxyphenyl)-2-oxoethyl]phosphonate **Vib** in CDCl<sub>3</sub>

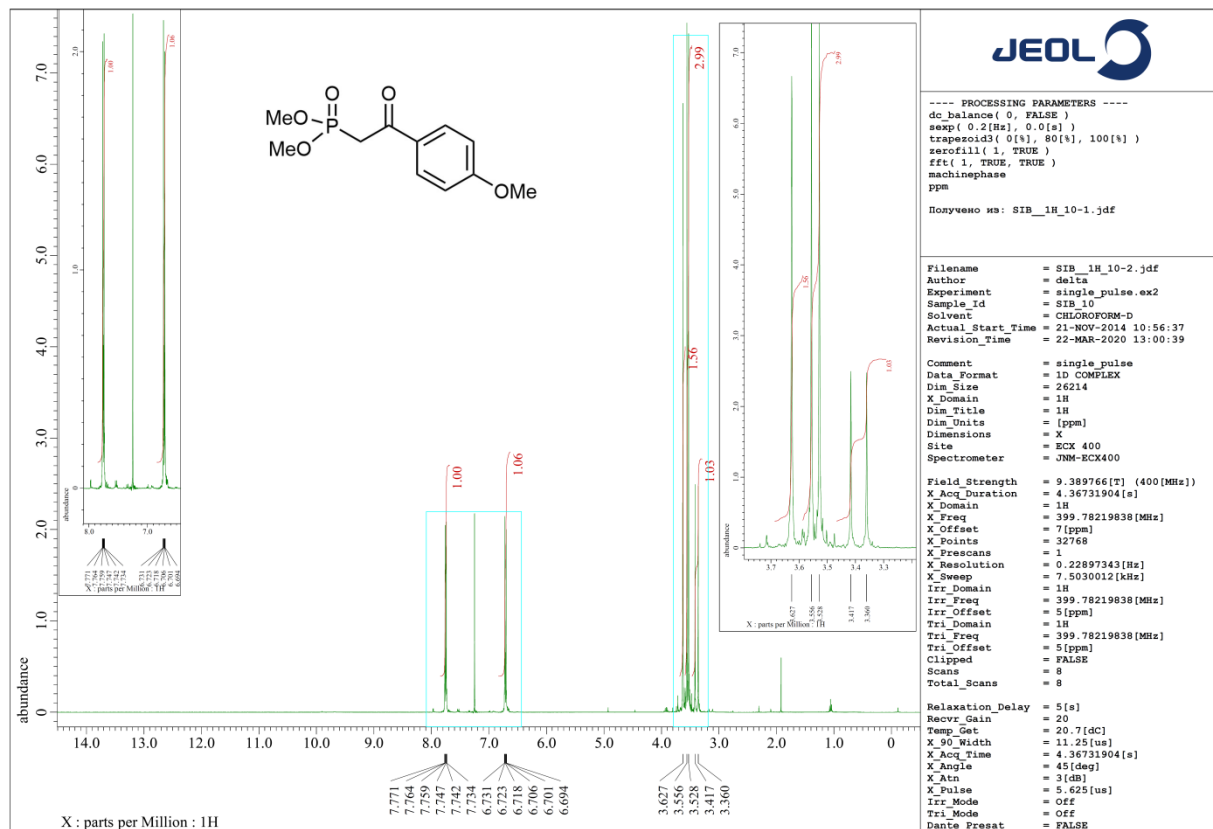

<sup>13</sup>C NMR spectra of dimethyl [2-(4-methoxyphenyl)-2-oxoethyl]phosphonate **Vib** in CDCl<sub>3</sub>

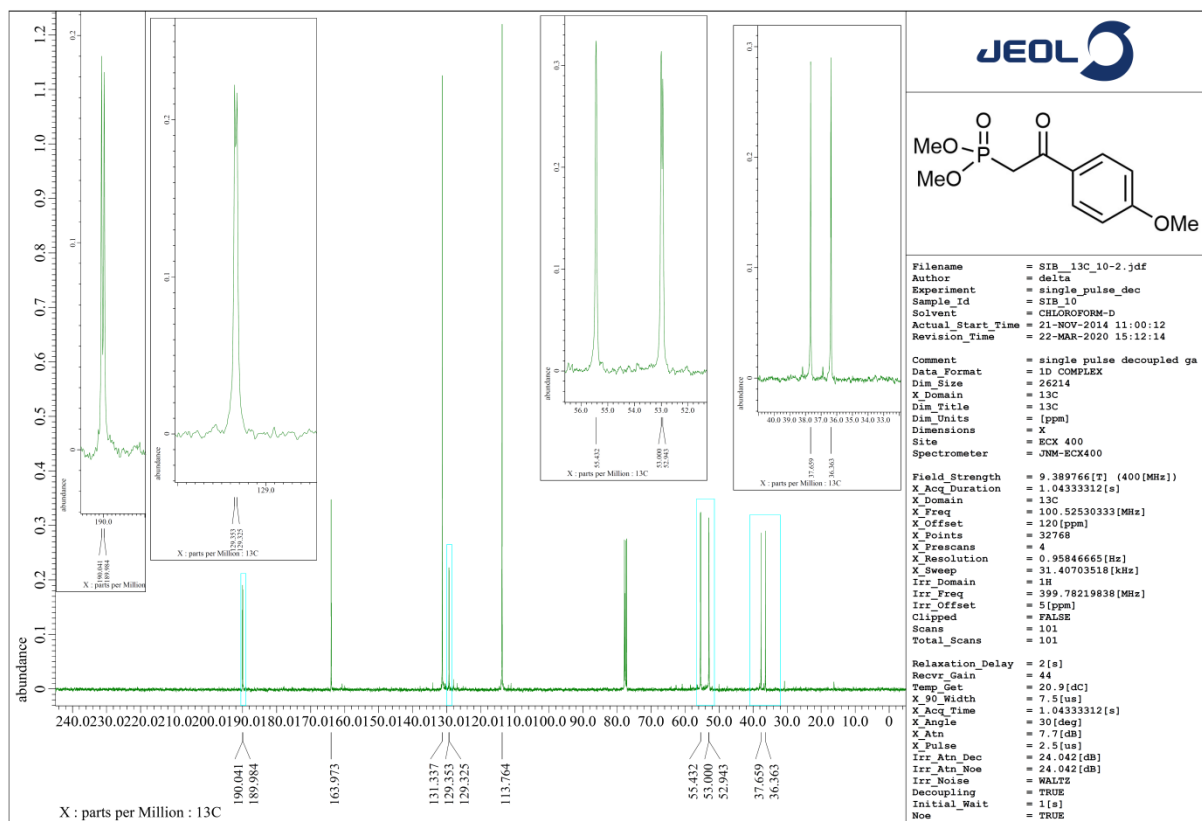



<sup>31</sup>P NMR spectra of dimethyl [2-(4-methoxyphenyl)-2-oxoethyl]phosphonate **Vib** in CDCl<sub>3</sub>

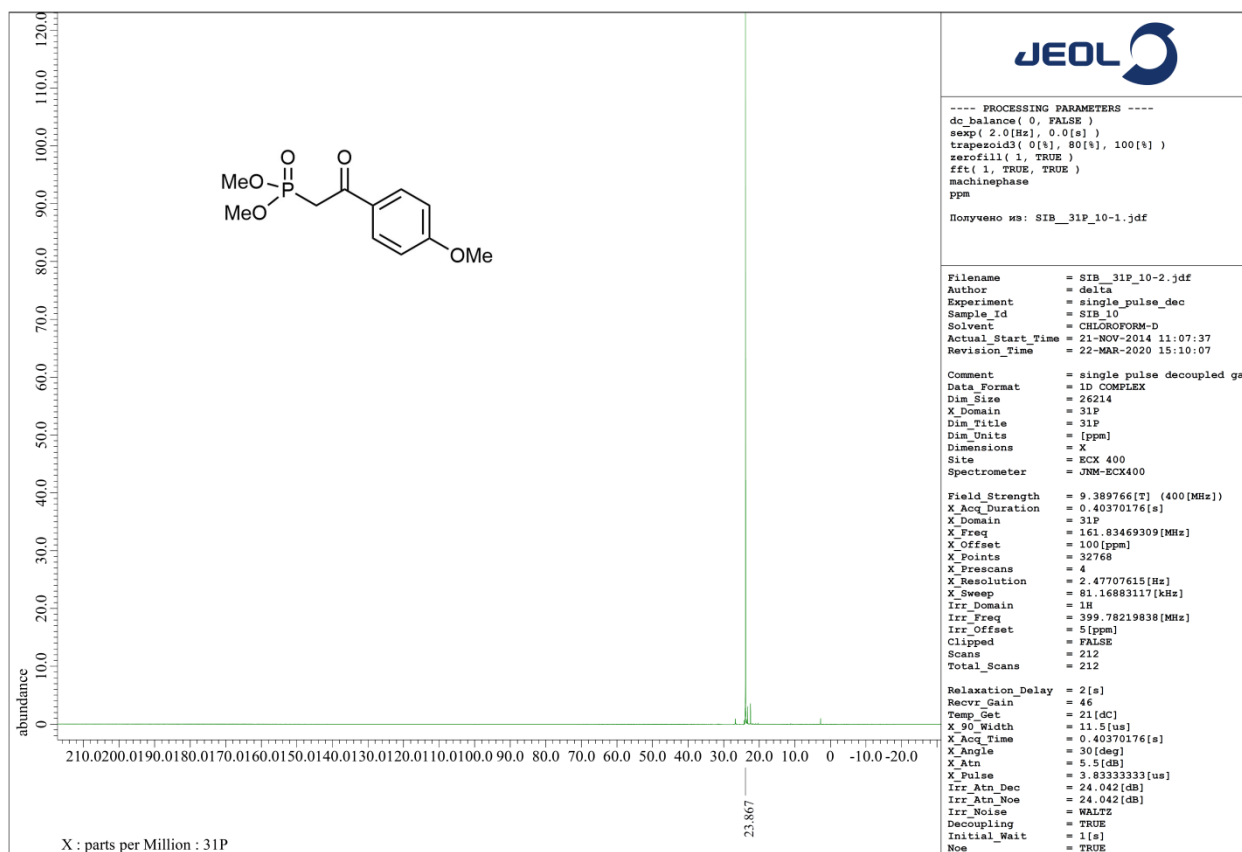

FTIR spectra of dimethyl [2-(3-methoxyphenyl)-2-oxoethyl]phosphonate **Vic**

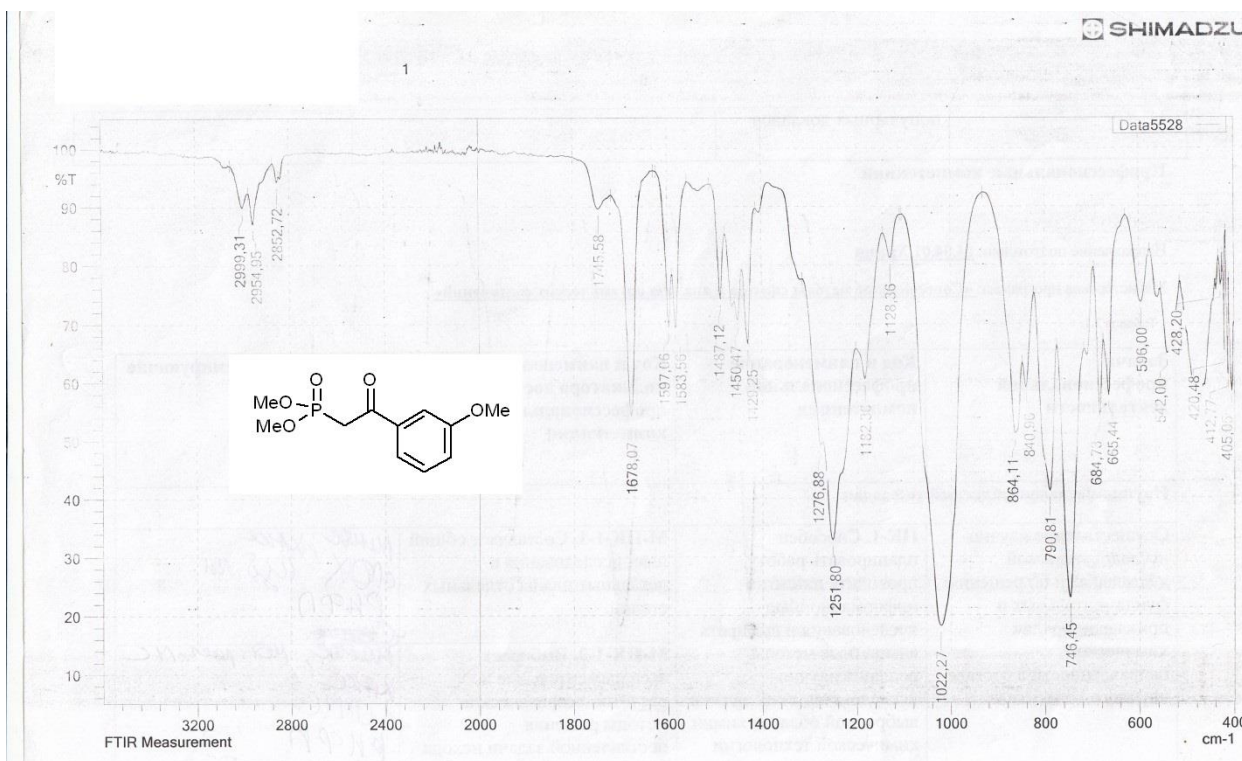



<sup>1</sup>H NMR spectra of dimethyl [2-(3-methoxyphenyl)-2-oxoethyl]phosphonate **Vlc** in CDCl<sub>3</sub>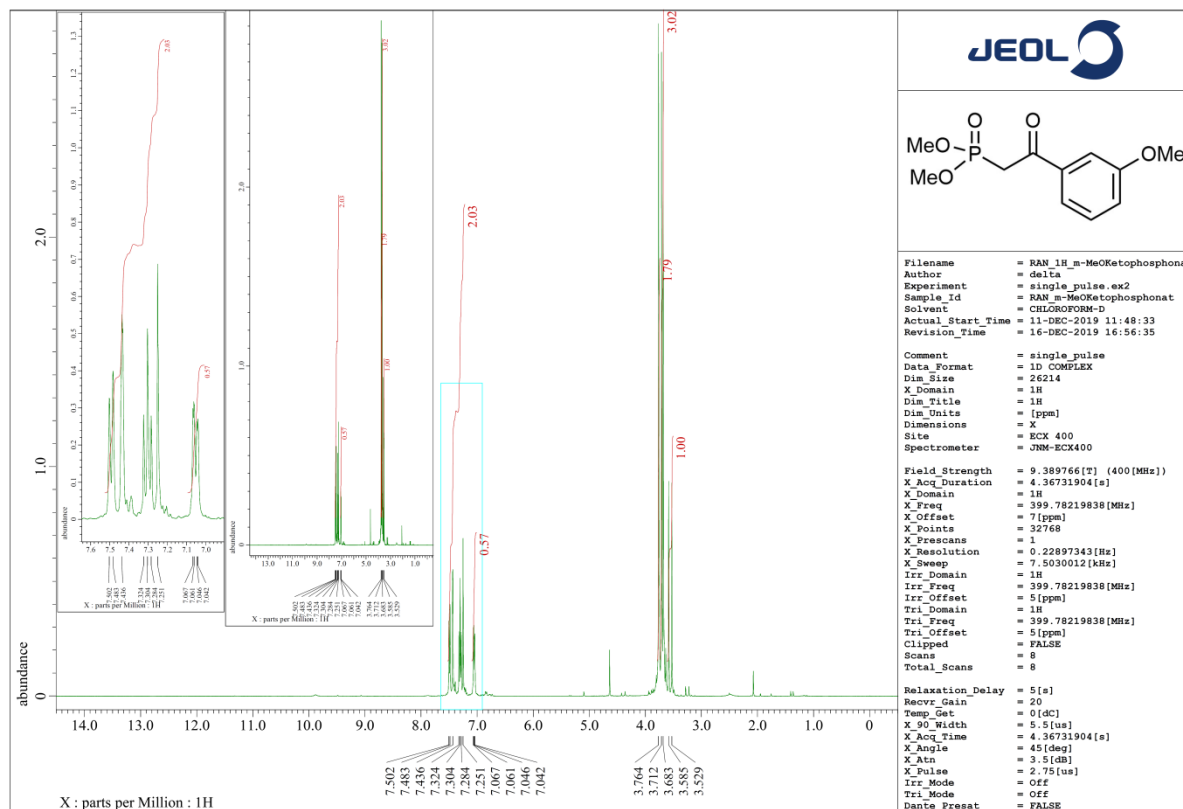<sup>13</sup>C NMR spectra of dimethyl [2-(3-methoxyphenyl)-2-oxoethyl]phosphonate **Vlc** in CDCl<sub>3</sub>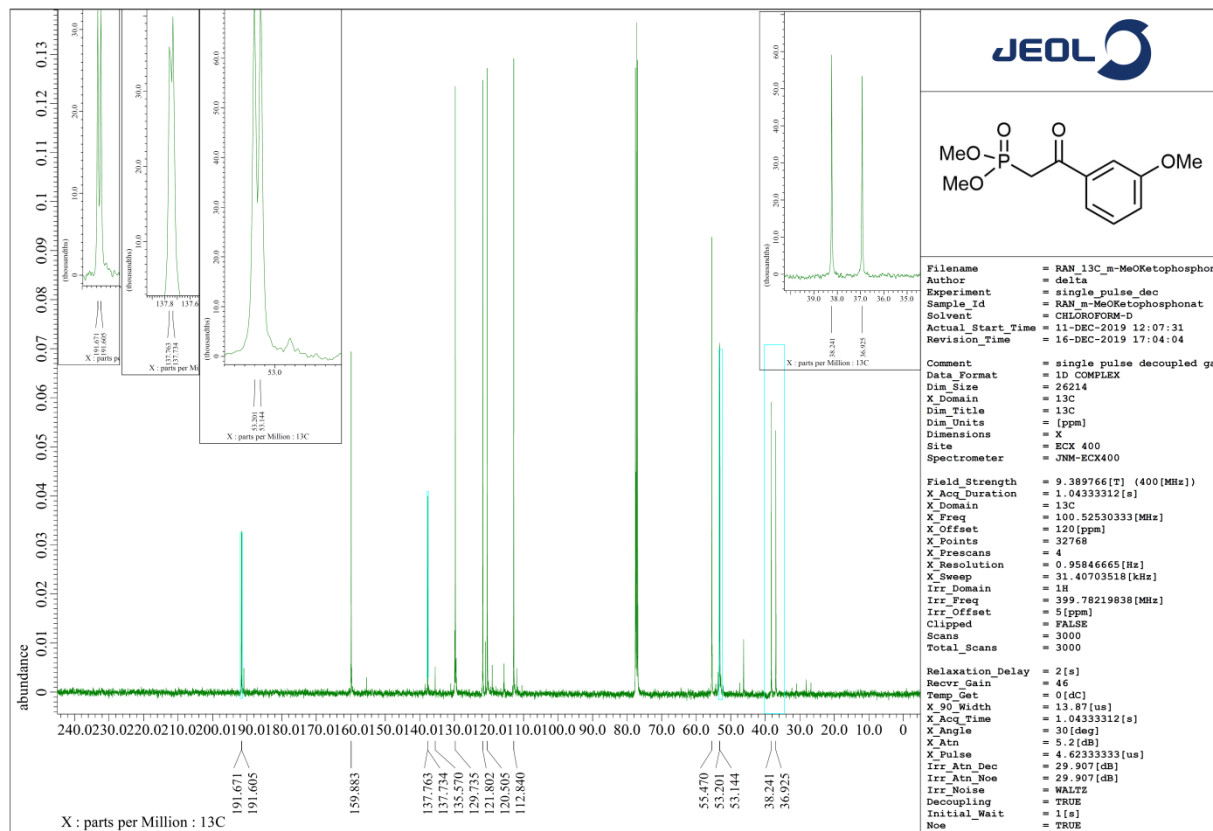



DEPT NMR spectra of dimethyl [2-(3-methoxyphenyl)-2-oxoethyl]phosphonate **Vlc** in CDCl<sub>3</sub>

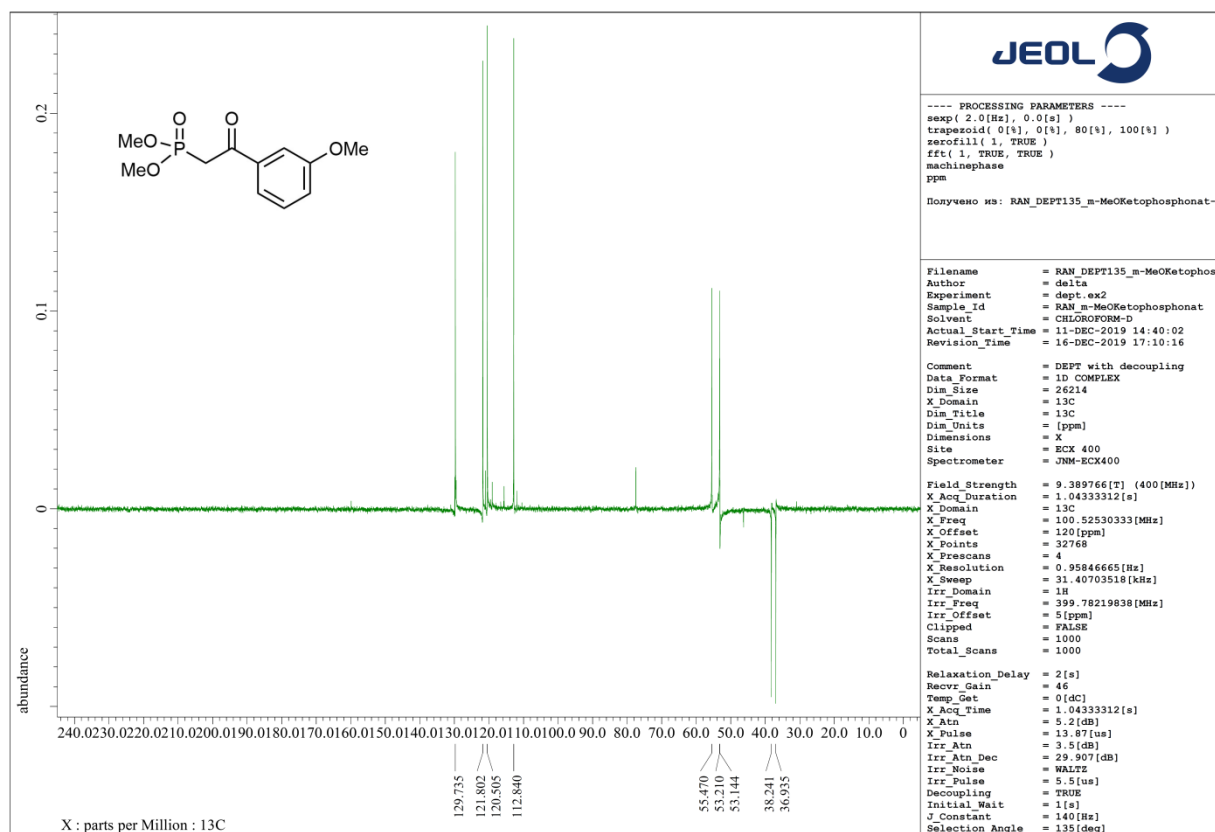

<sup>31</sup>P NMR spectra of dimethyl [2-(3-methoxyphenyl)-2-oxoethyl]phosphonate **Vlc** in CDCl<sub>3</sub>

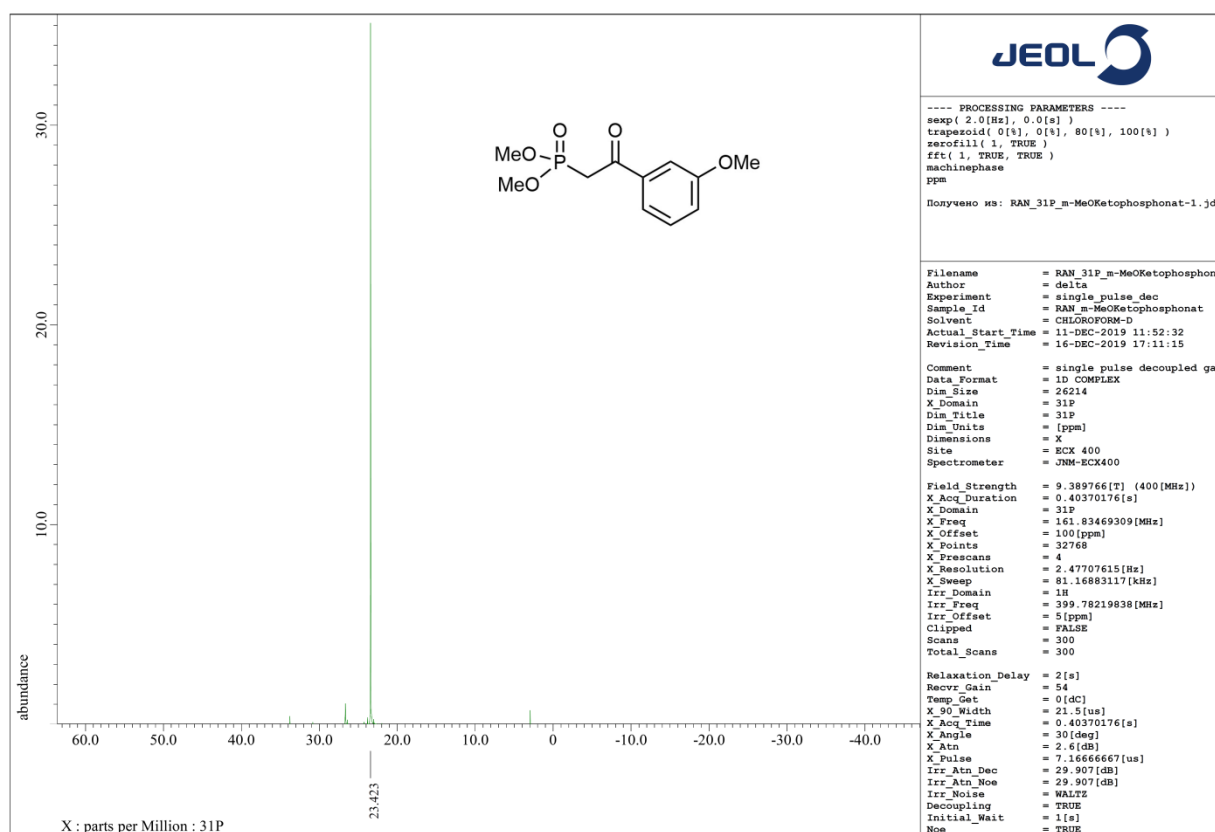



FTIR spectra of dimethyl [2-(2-methoxyphenyl)-2-oxoethyl]phosphonate **VId**

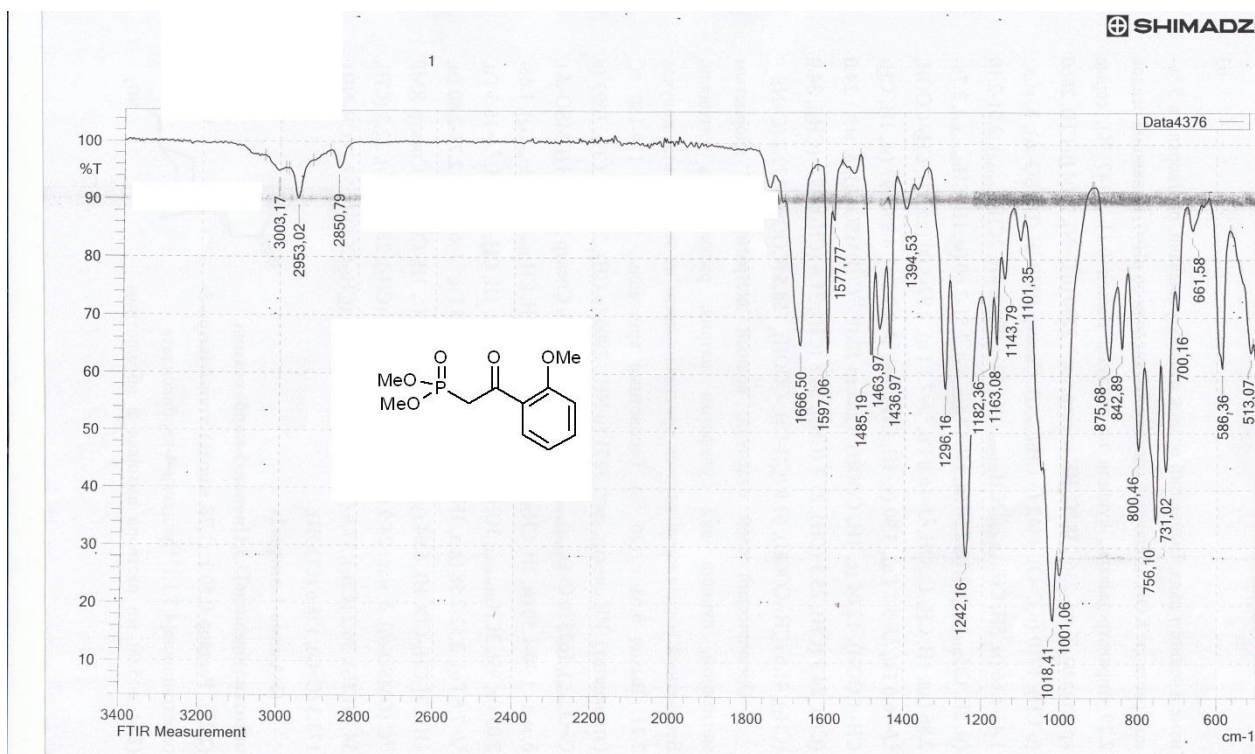

<sup>1</sup>H NMR spectra of dimethyl [2-(2-methoxyphenyl)-2-oxoethyl]phosphonate **VId** in CDCl<sub>3</sub>

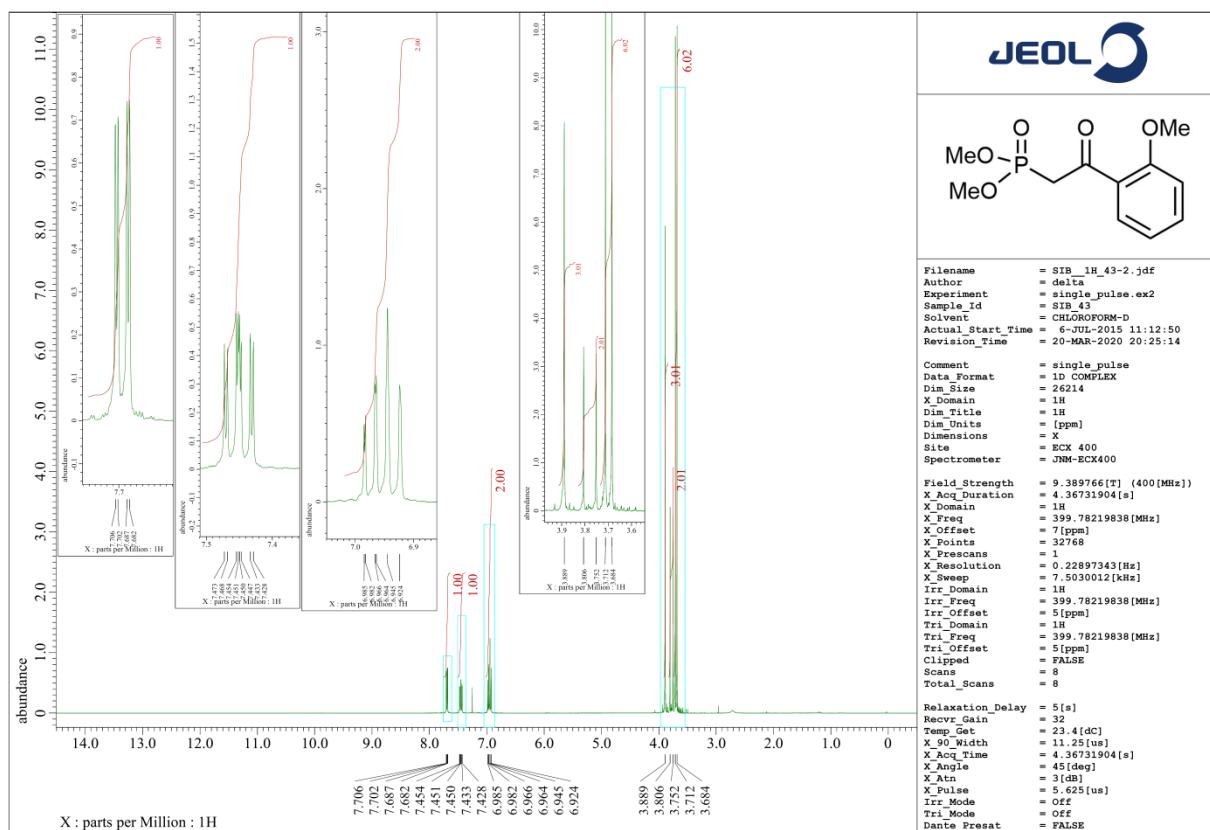



<sup>13</sup>C NMR spectra of dimethyl [2-(2-methoxyphenyl)-2-oxoethyl]phosphonate **VId** in CDCl<sub>3</sub>

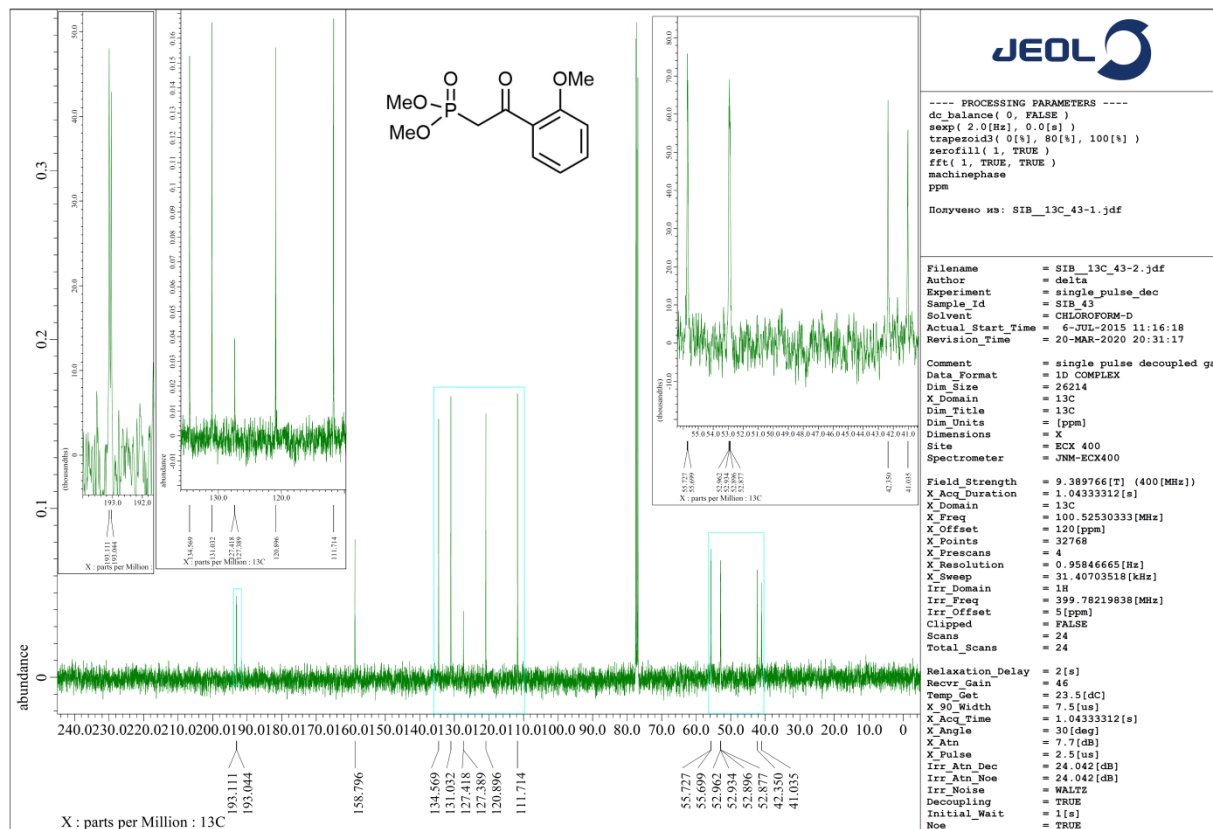

<sup>31</sup>P NMR spectra of dimethyl [2-(2-methoxyphenyl)-2-oxoethyl]phosphonate **VId** in CDCl<sub>3</sub>

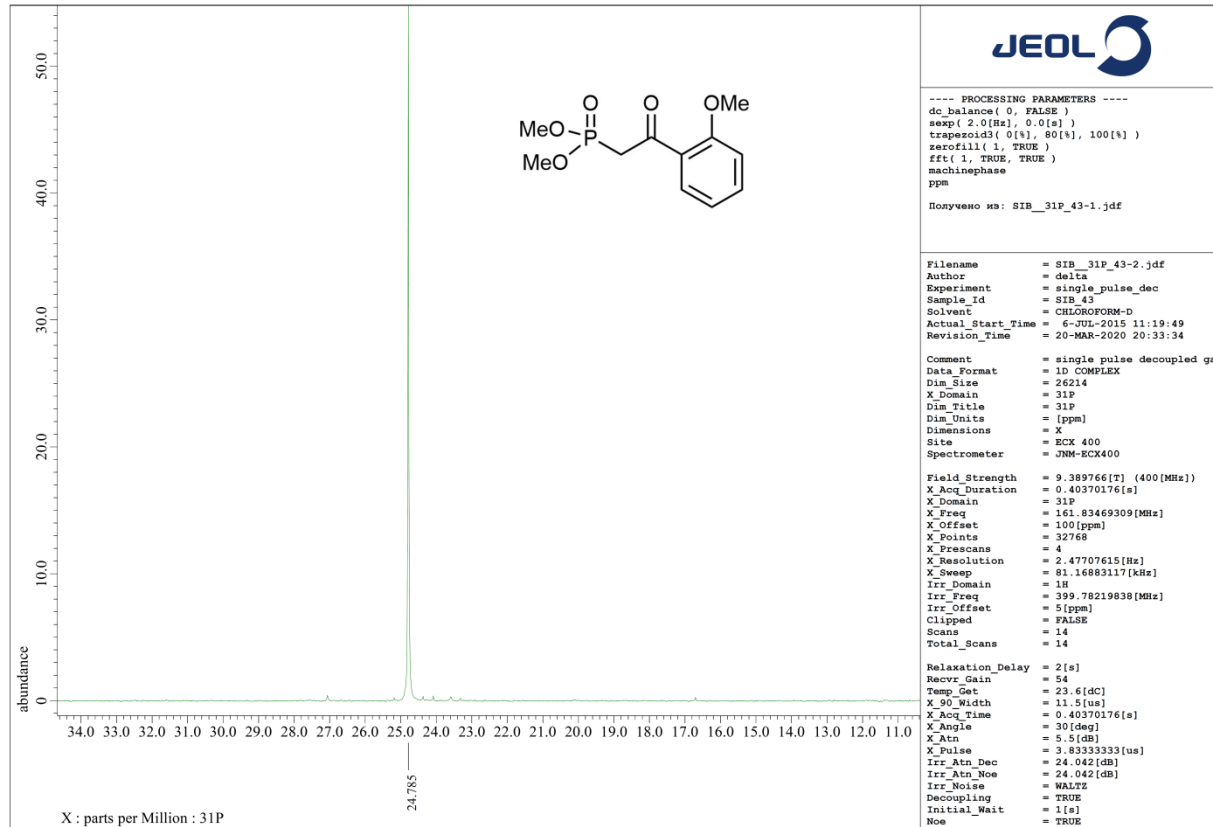



FTIR spectra of dimethyl (2-(adamantan-1-yl)-2-oxoethyl)phosphonate **Vle**

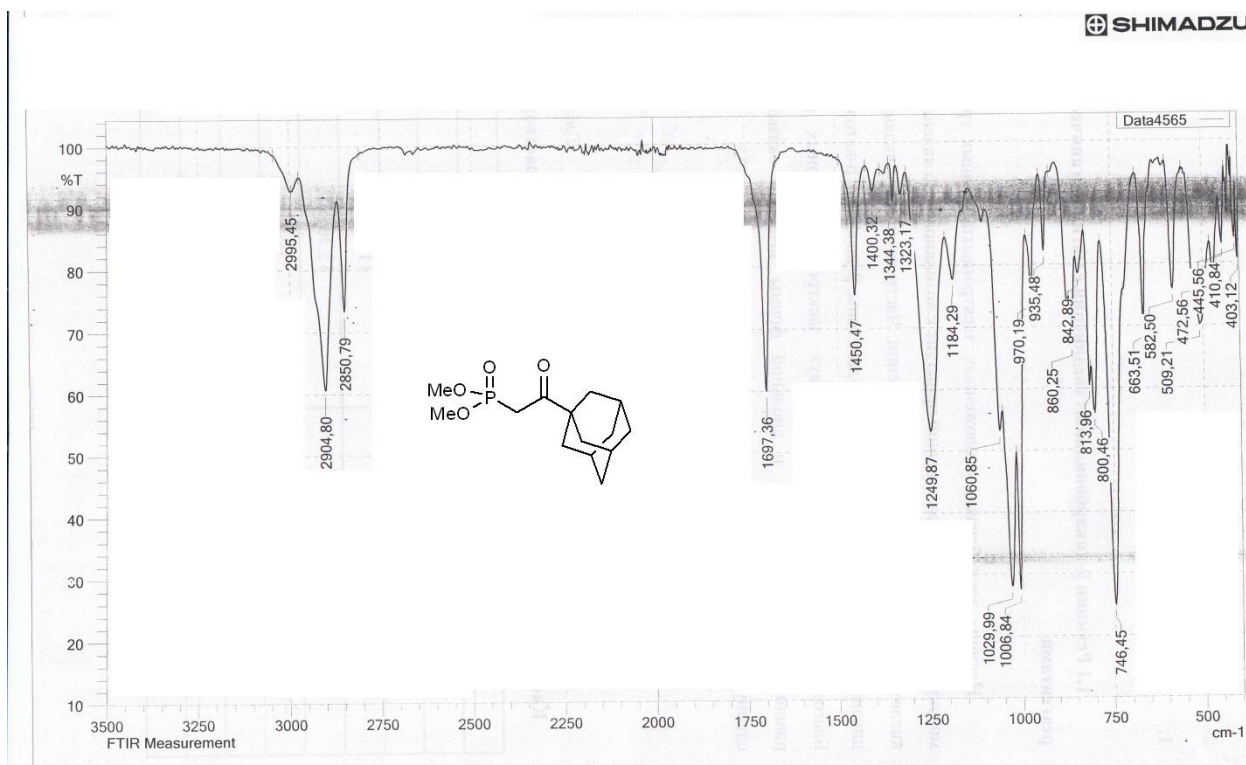

<sup>1</sup>H NMR spectra of dimethyl (2-(adamantan-1-yl)-2-oxoethyl)phosphonate **Vle** in CDCl<sub>3</sub>

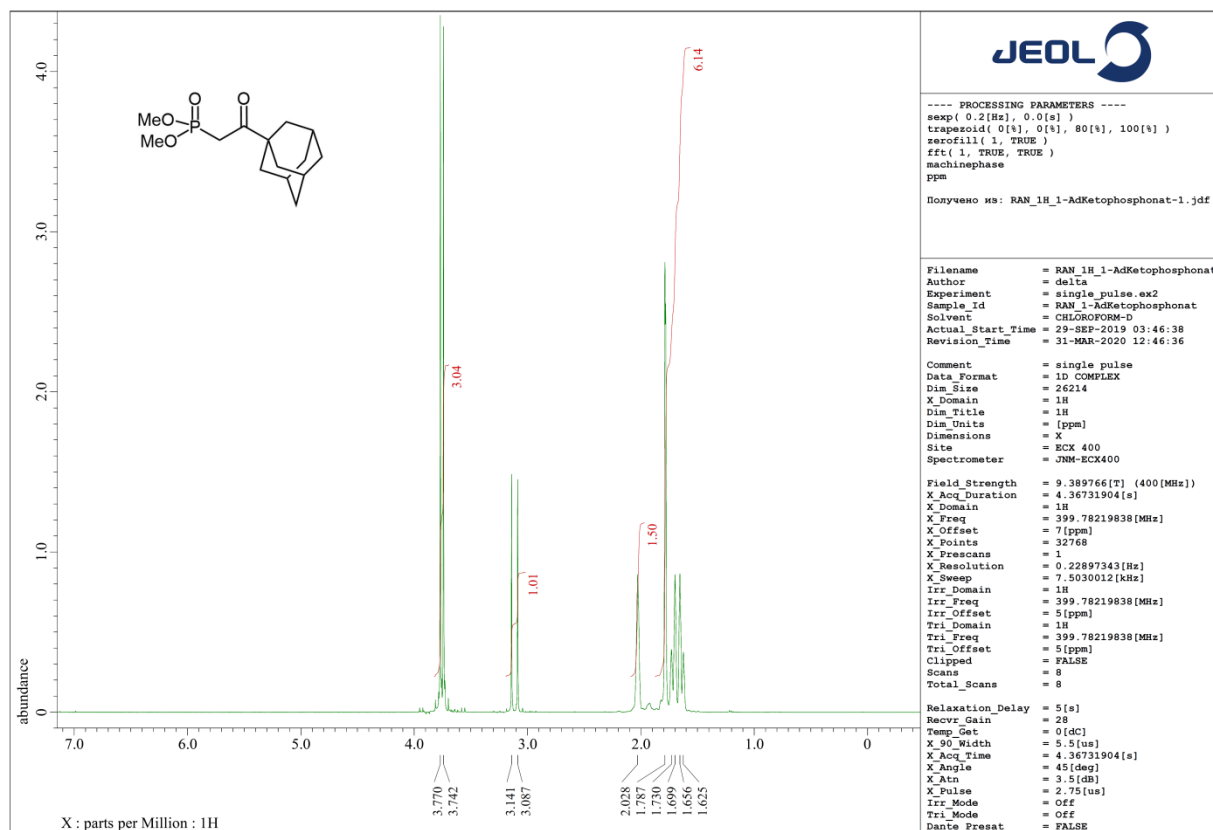



<sup>13</sup>C NMR spectra of dimethyl (2-(adamantan-1-yl)-2-oxoethyl)phosphonate **Vle** in CDCl<sub>3</sub>

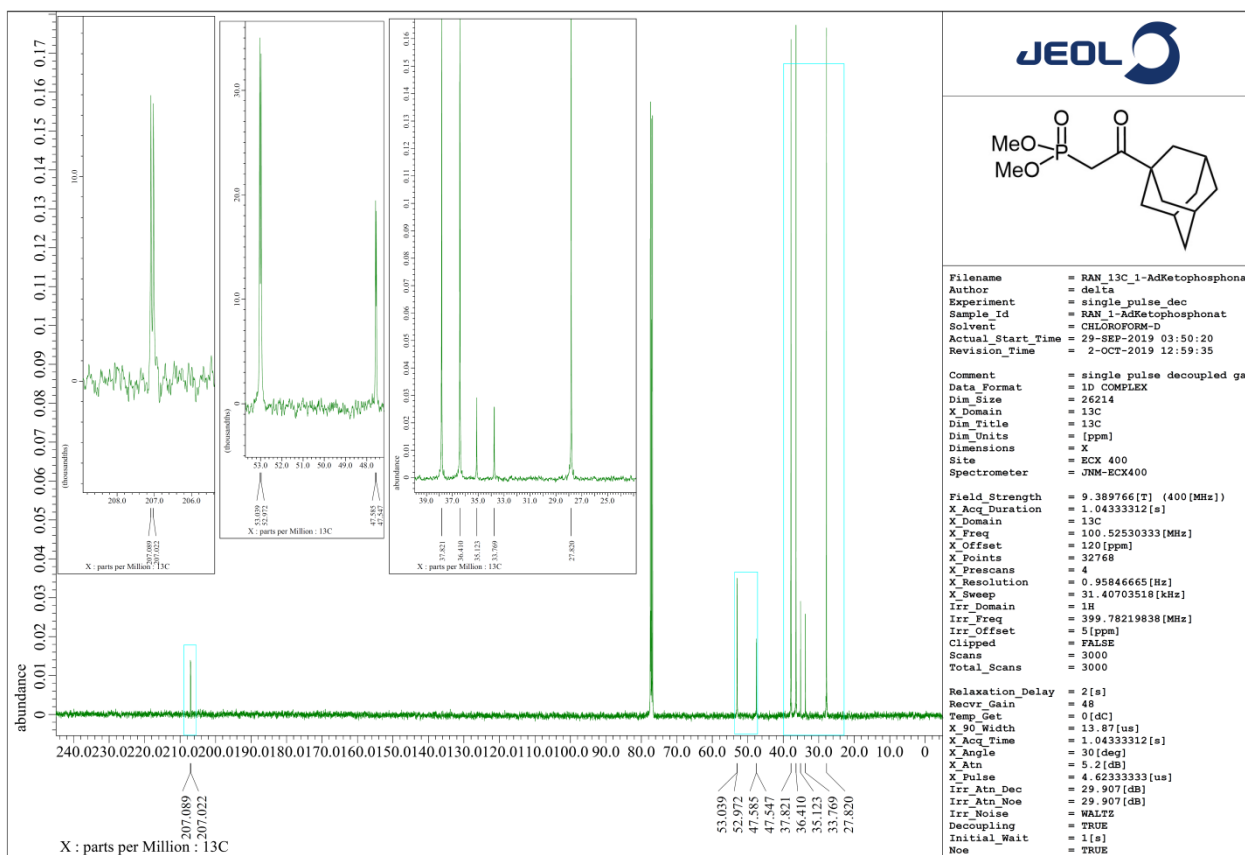

DEPT NMR spectra of dimethyl (2-(adamantan-1-yl)-2-oxoethyl)phosphonate **Vle** in CDCl<sub>3</sub>

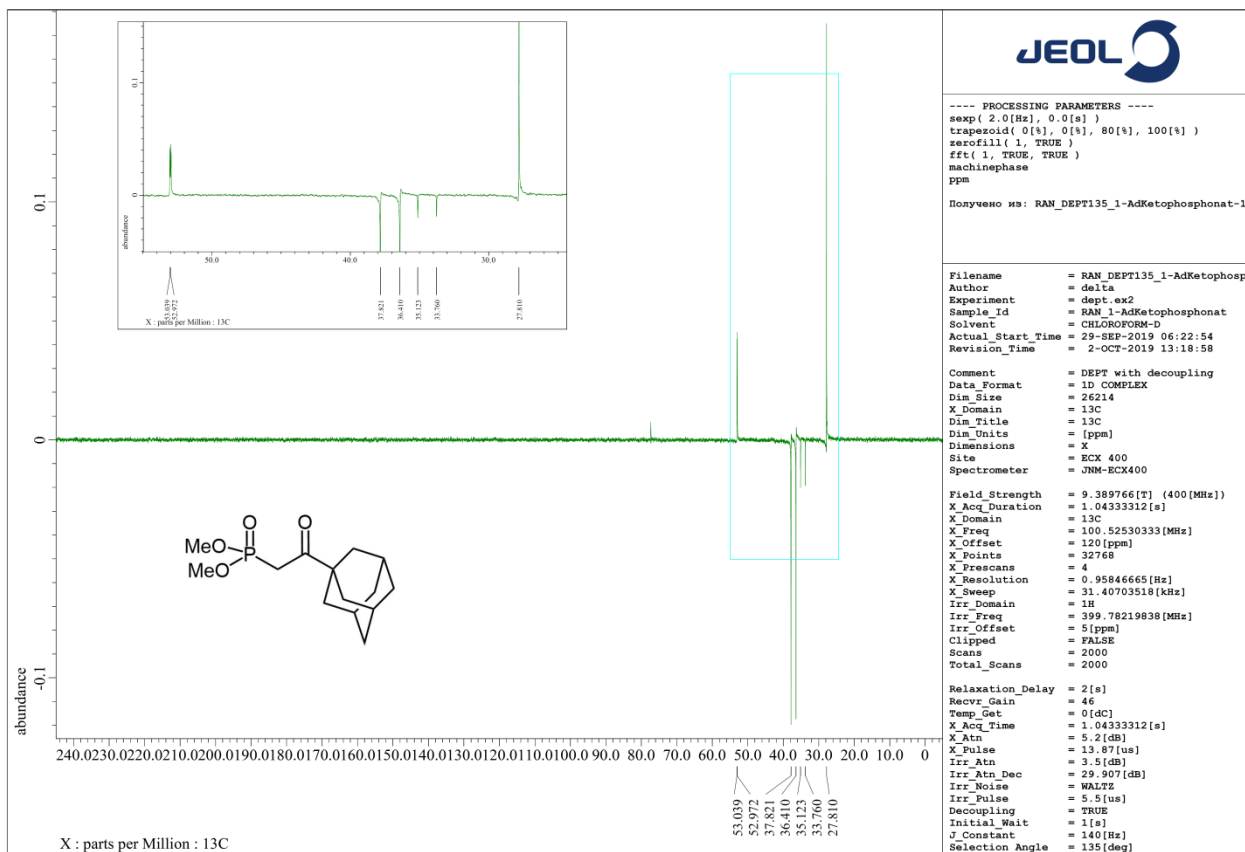



<sup>31</sup>P NMR spectra of dimethyl (2-(adamantan-1-yl)-2-oxoethyl)phosphonate **Vle** in CDCl<sub>3</sub>

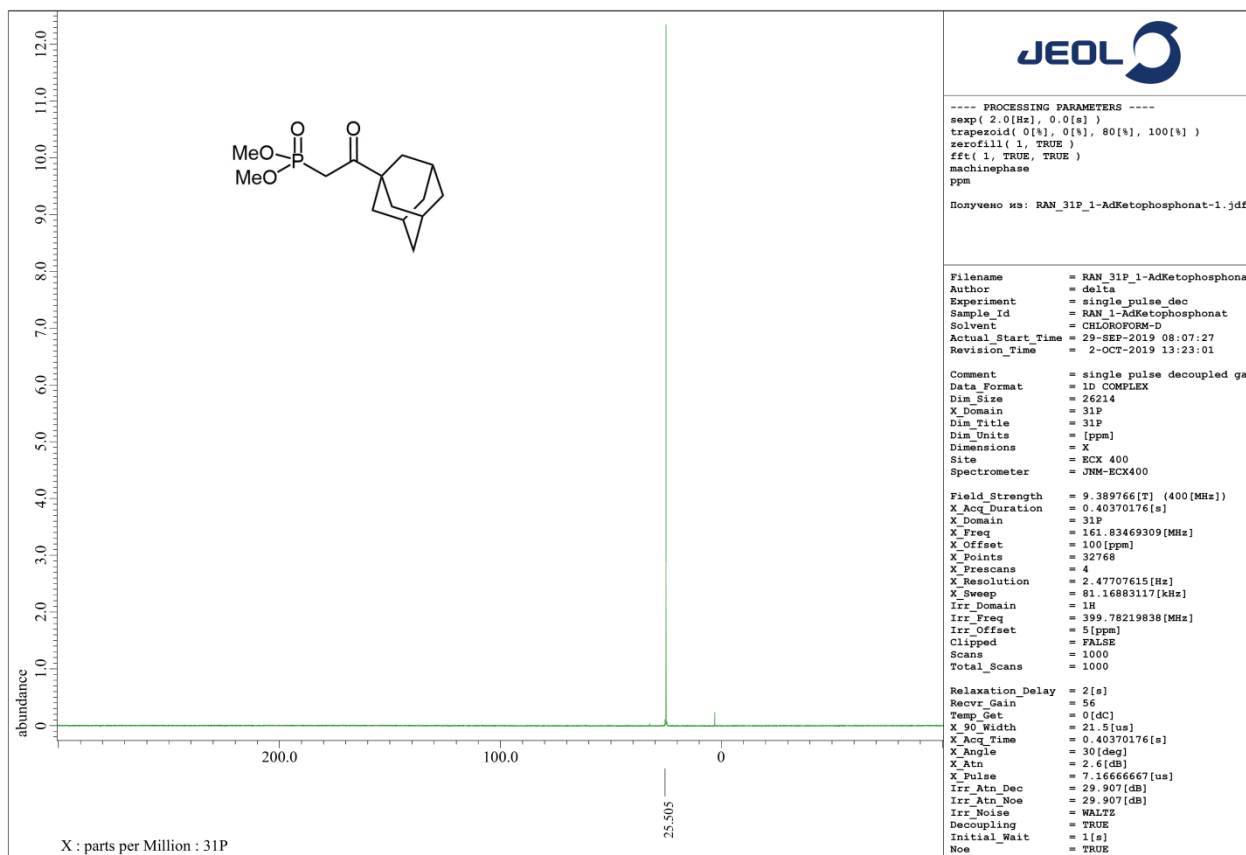



## 7. Copies of NMR, FTIR and mass spectra for phosphonates 6a-f

FTIR spectra of dimethyl [(2*R*,3*S*)-4-nitro-1-oxo-1,3-diphenylbutan-2-yl]phosphonate (**6a**)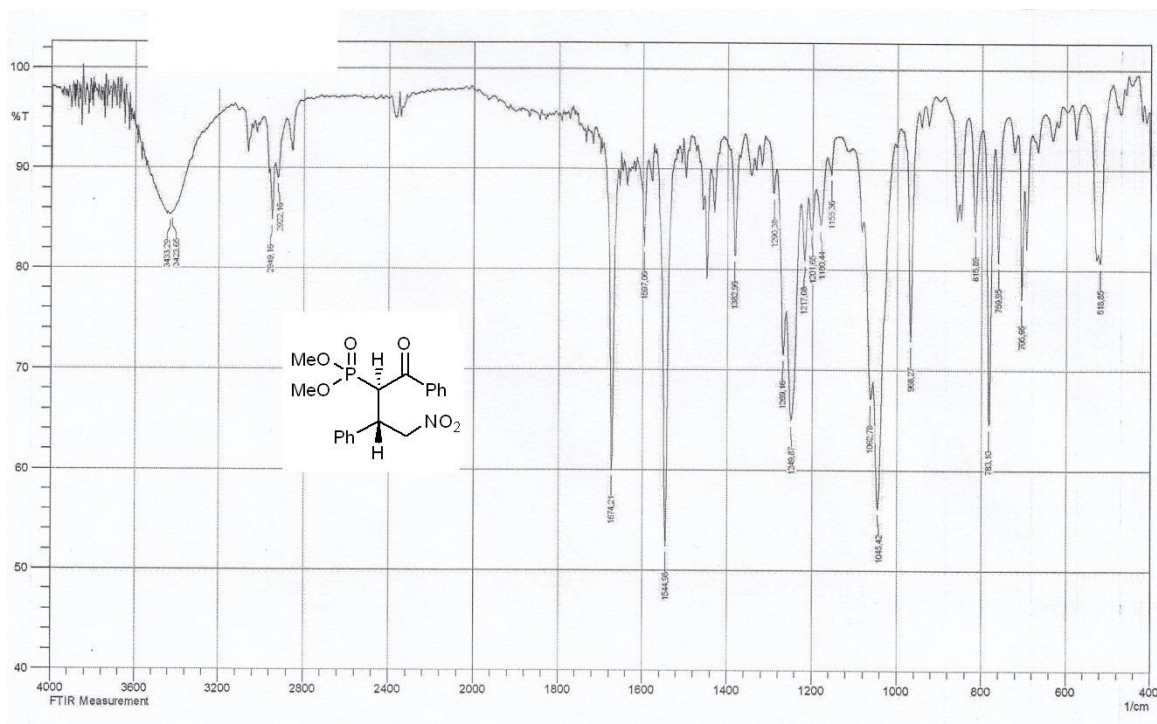<sup>1</sup>H NMR spectra of dimethyl [(2*R*,3*S*)-4-nitro-1-oxo-1,3-diphenylbutan-2-yl]phosphonate (**6a**) in CDCl<sub>3</sub>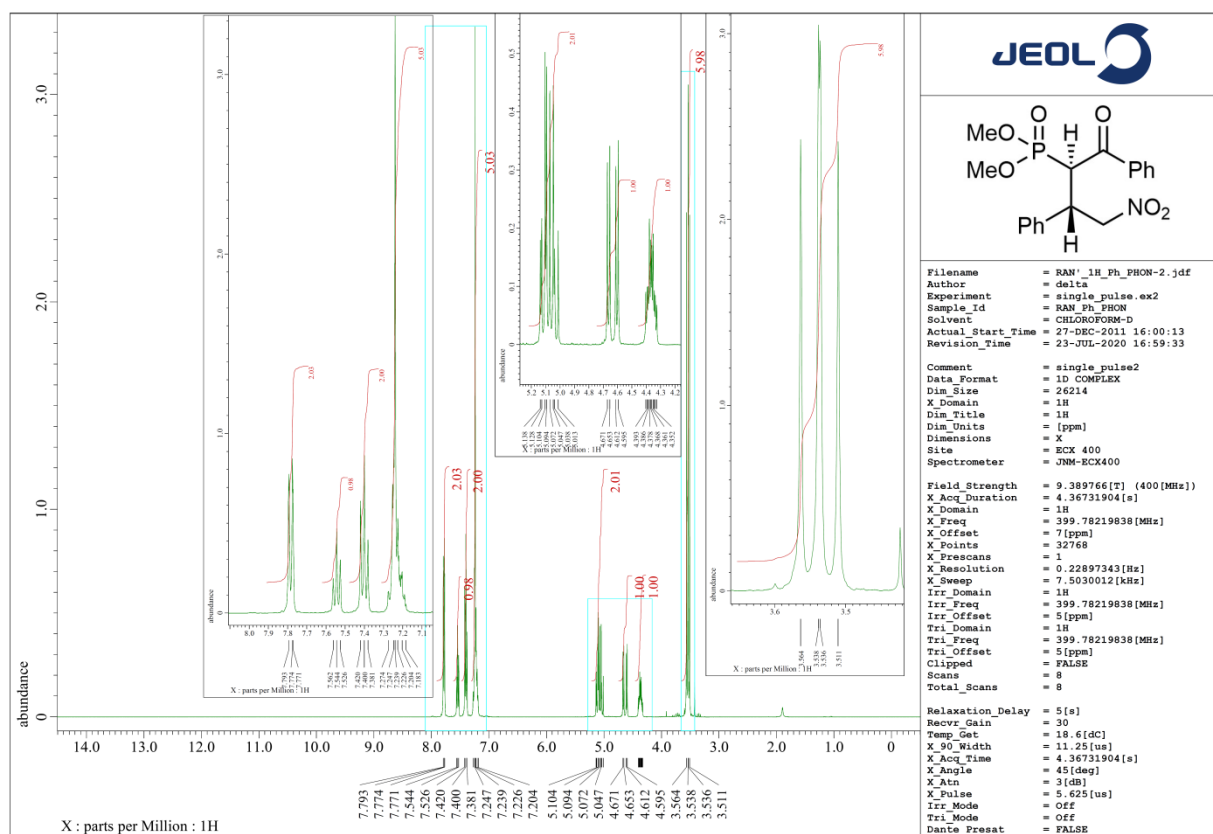



<sup>13</sup>C NMR spectra of dimethyl [(2*R*,3*S*)-4-nitro-1-oxo-1,3-diphenylbutan-2-yl]phosphonate (**6a**) in CDCl<sub>3</sub>

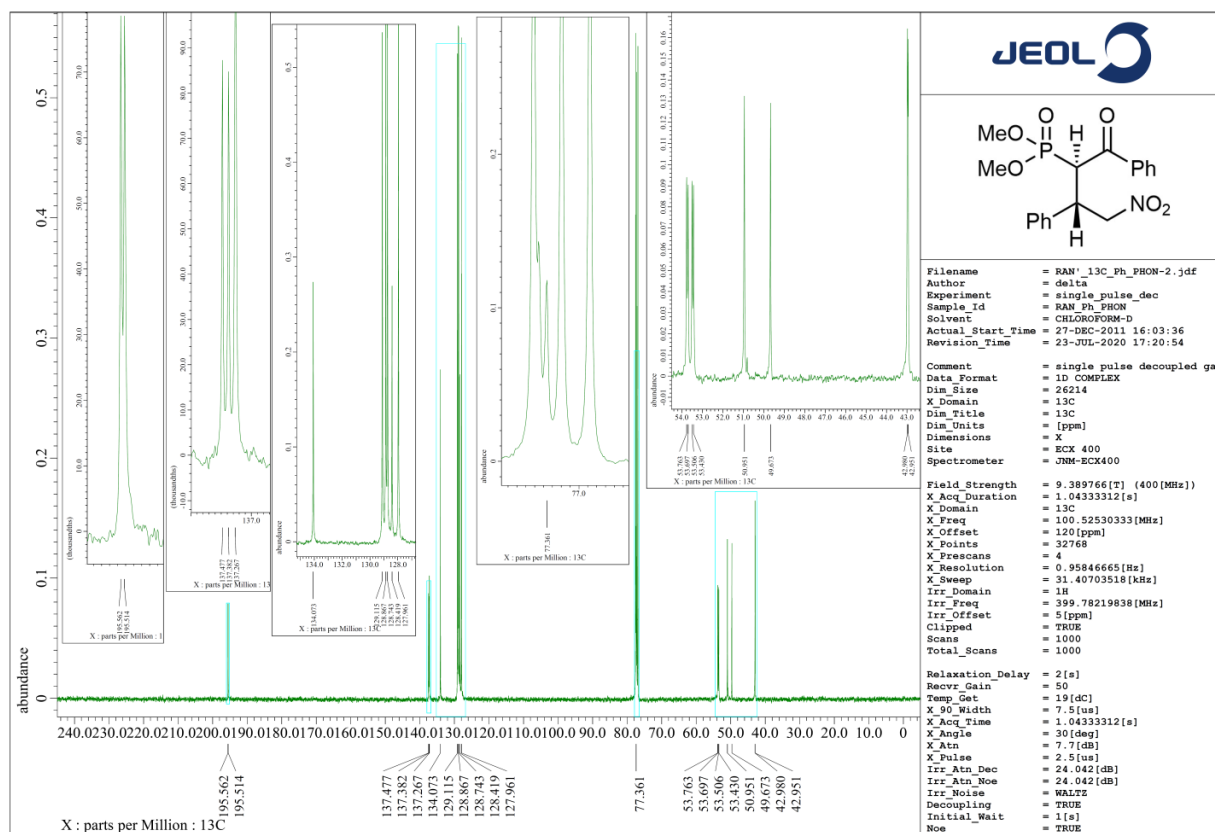

<sup>31</sup>P NMR spectra of dimethyl [(2*R*,3*S*)-4-nitro-1-oxo-1,3-diphenylbutan-2-yl]phosphonate (**6a**) in CDCl<sub>3</sub>

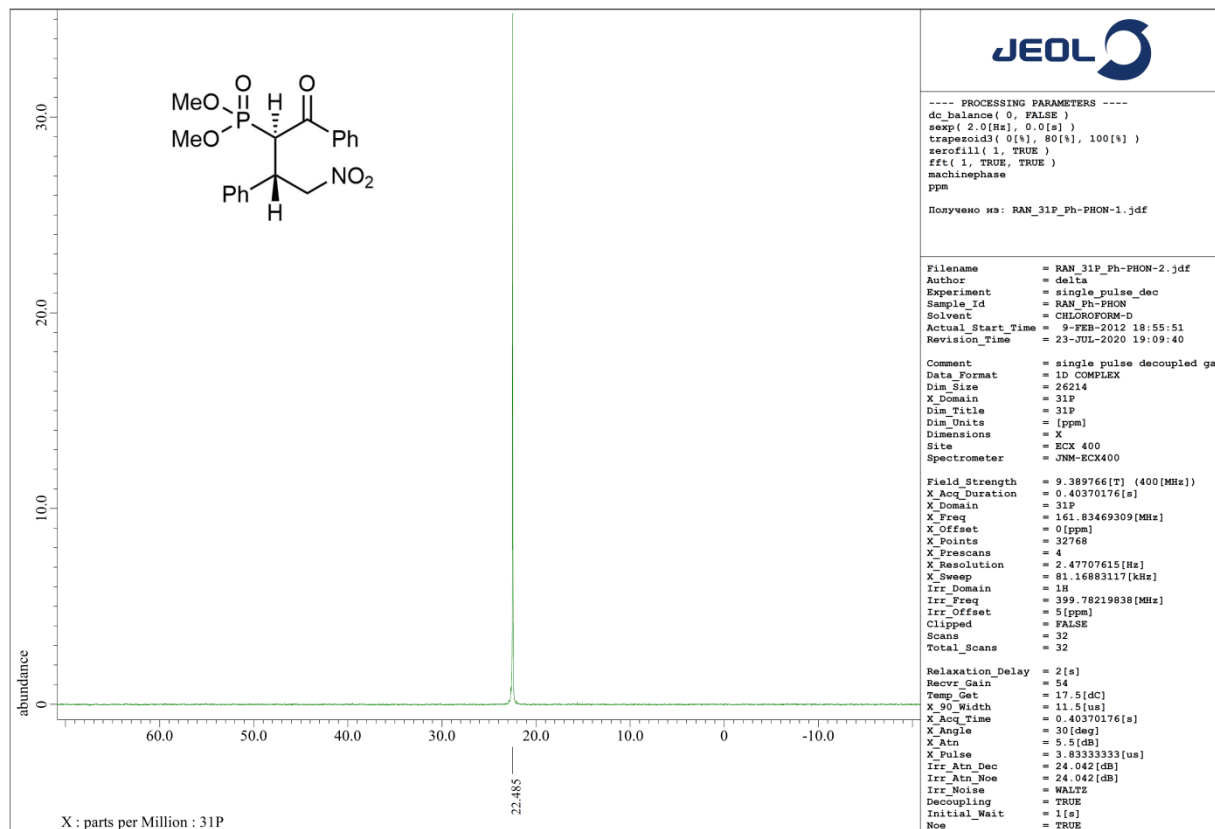



HRMS of dimethyl [(2*R*,3*S*)-4-nitro-1-oxo-1,3-diphenylbutan-2-yl]phosphonate (**6a**)

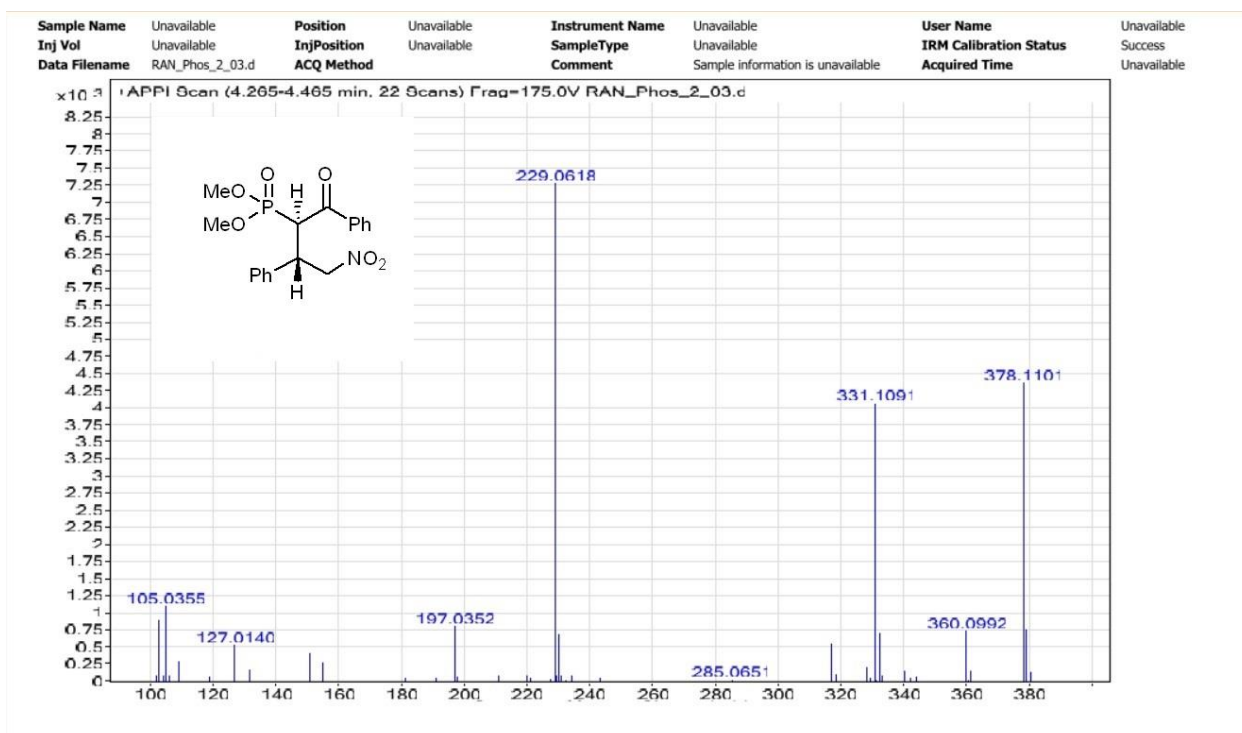

FTIR spectra of dimethyl [(2*R*,3*S*)-1-(4-methoxyphenyl)-4-nitro-1-oxo-3-phenylbutan-2-yl]-phosphonate

(**6b**)

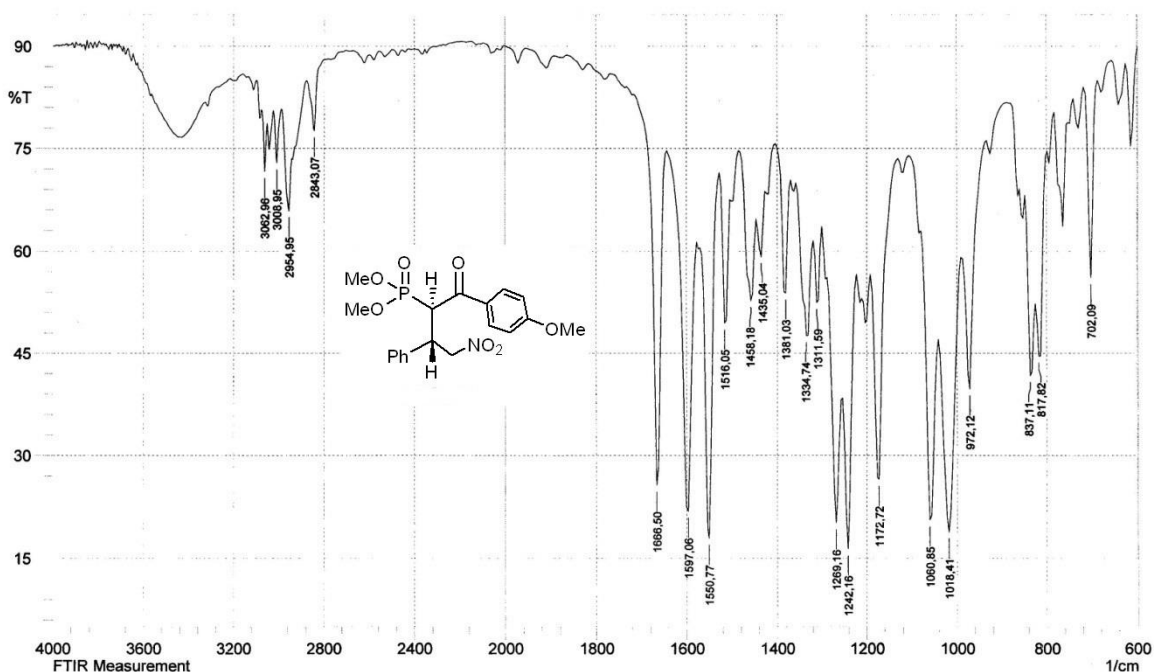



<sup>1</sup>H NMR spectra of dimethyl [(2*R*,3*S*)-1-(4-methoxyphenyl)-4-nitro-1-oxo-3-phenylbutan-2-yl]-phosphonate (**6b**) in CDCl<sub>3</sub>

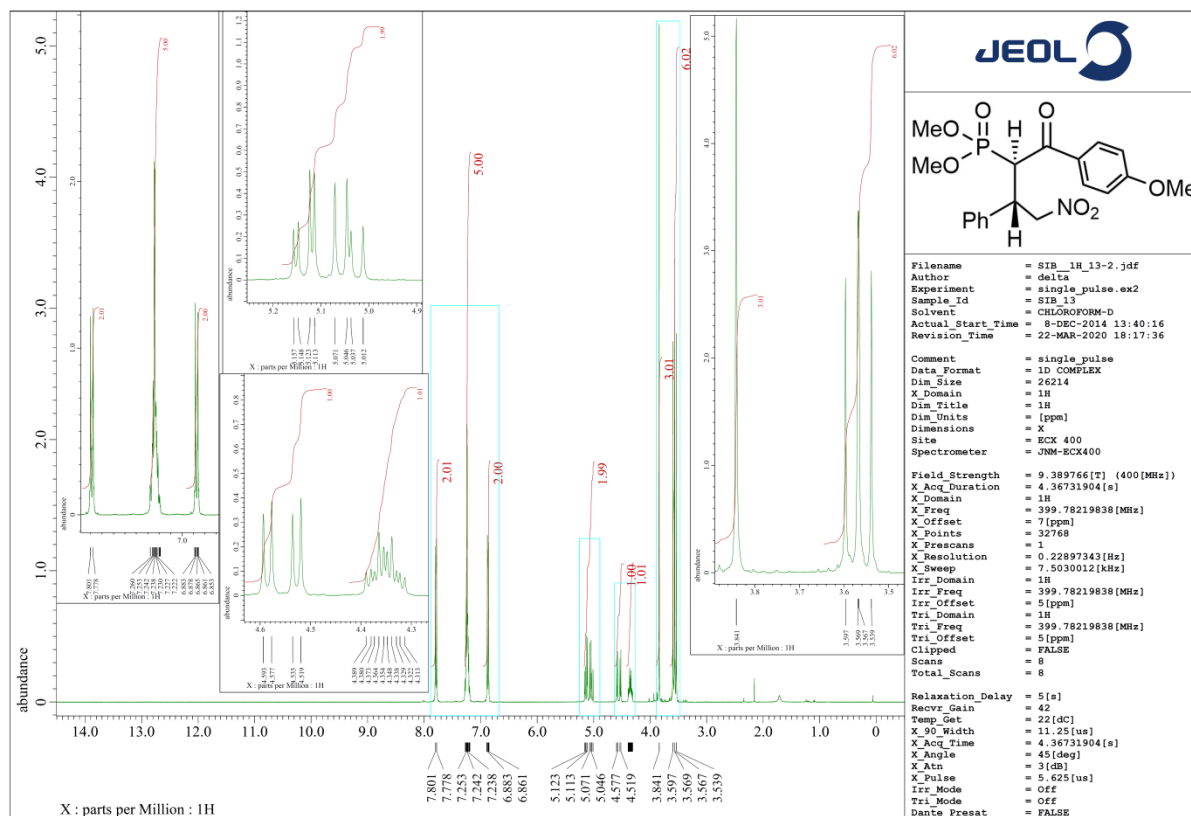

<sup>13</sup>C NMR spectra of dimethyl [(2*R*,3*S*)-1-(4-methoxyphenyl)-4-nitro-1-oxo-3-phenylbutan-2-yl]-phosphonate (**6b**) in CDCl<sub>3</sub>

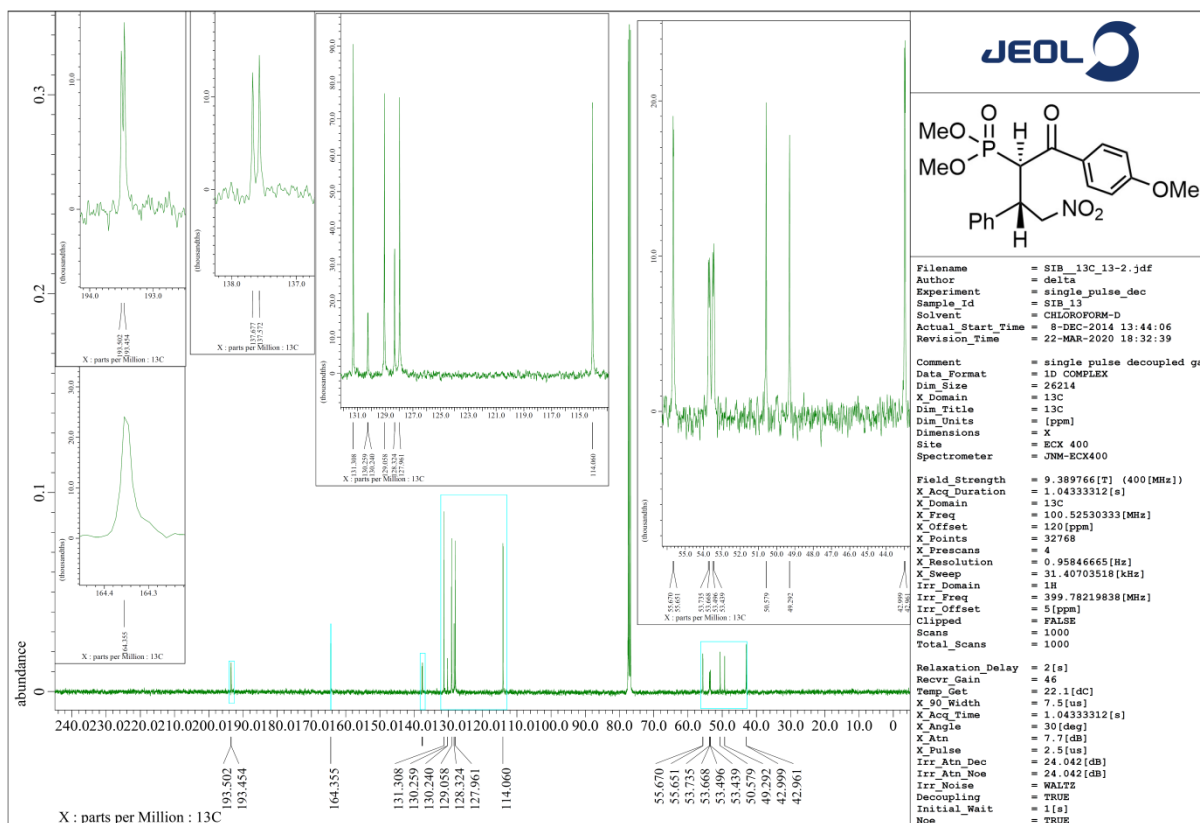



<sup>31</sup>P NMR spectra of dimethyl [(2*R*,3*S*)-1-(4-methoxyphenyl)-4-nitro-1-oxo-3-phenylbutan-2-yl]-phosphonate (**6b**) in CDCl<sub>3</sub>

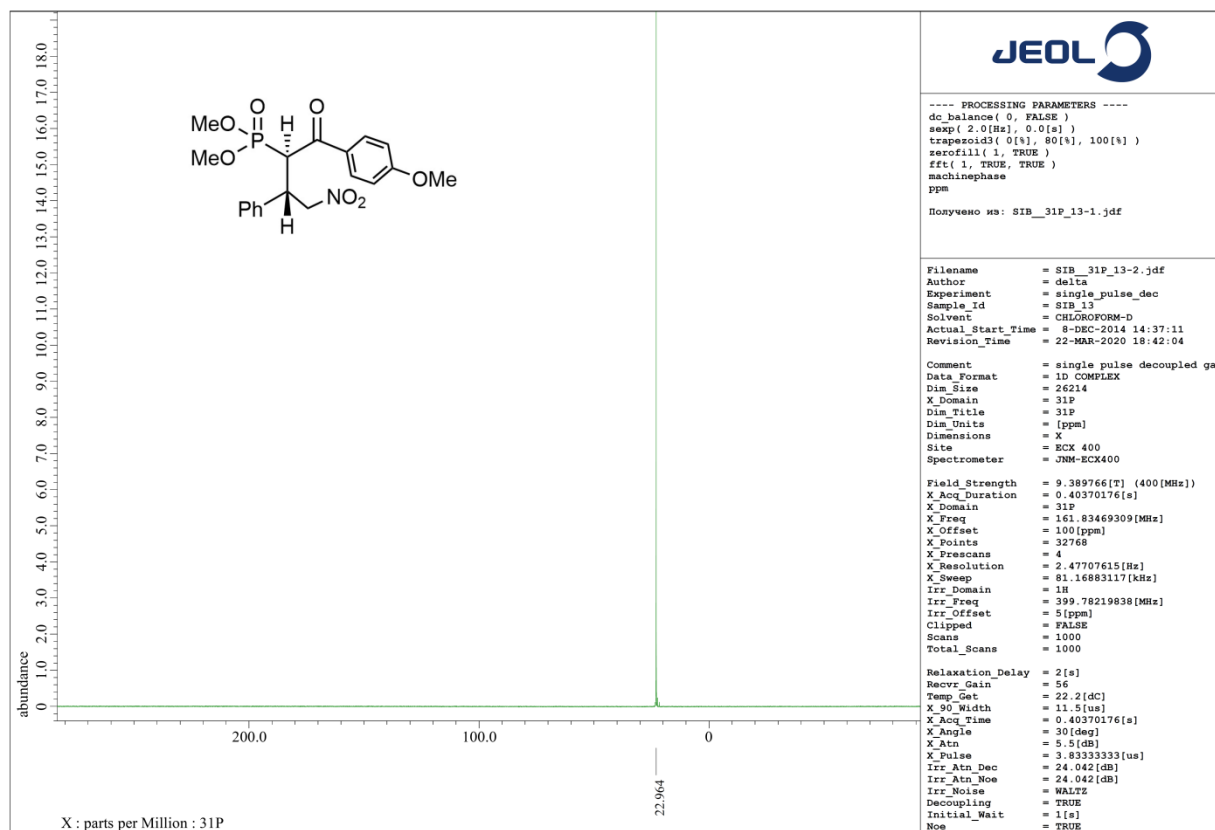

HRMS of dimethyl [(2*R*,3*S*)-1-(4-methoxyphenyl)-4-nitro-1-oxo-3-phenylbutan-2-yl]-phosphonate (**6b**)

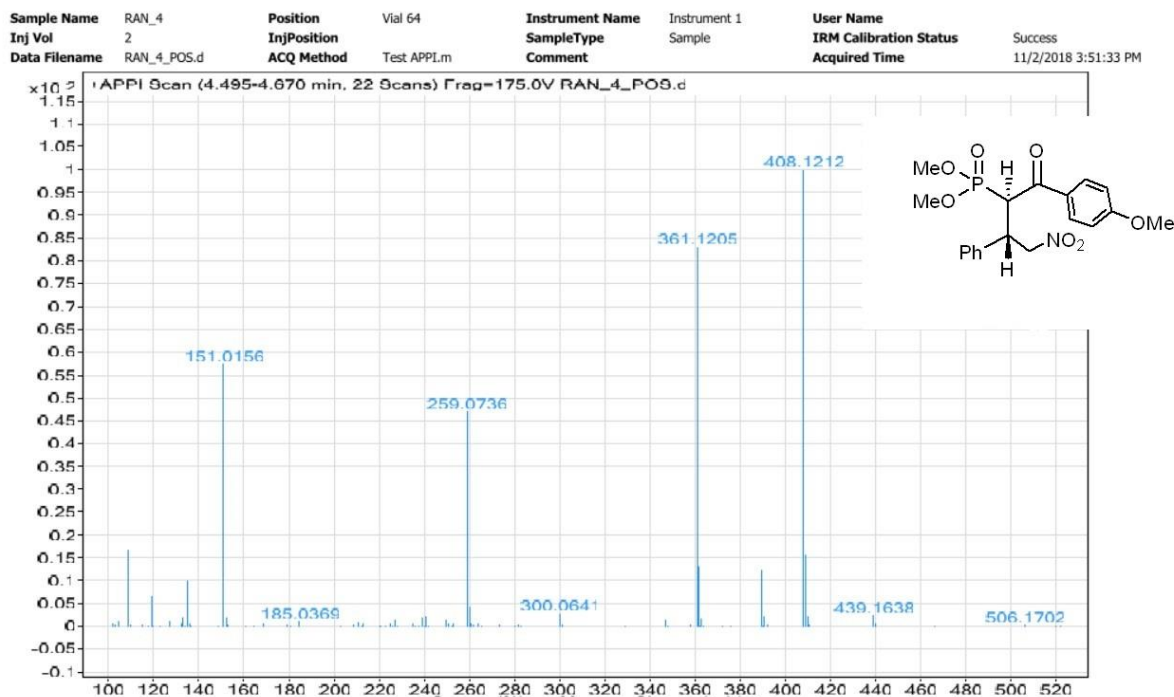



FTIR spectra of dimethyl [(2*R*,3*S*)-1-(3-methoxyphenyl)-4-nitro-1-oxo-3-phenylbutan-2-yl]phosphonate

(6c)

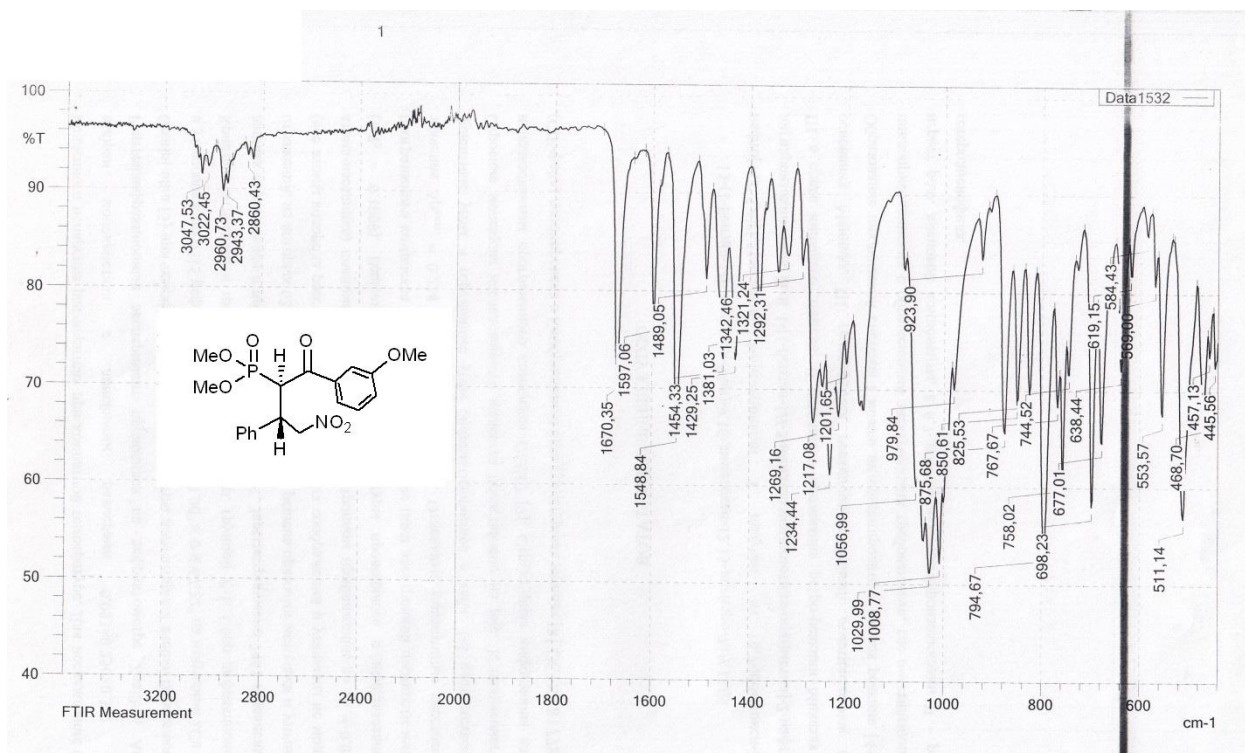

<sup>1</sup>H NMR spectra of dimethyl [(2*R*,3*S*)-1-(3-methoxyphenyl)-4-nitro-1-oxo-3-phenylbutan-2-yl]phosphonate

(6c) in CDCl<sub>3</sub>

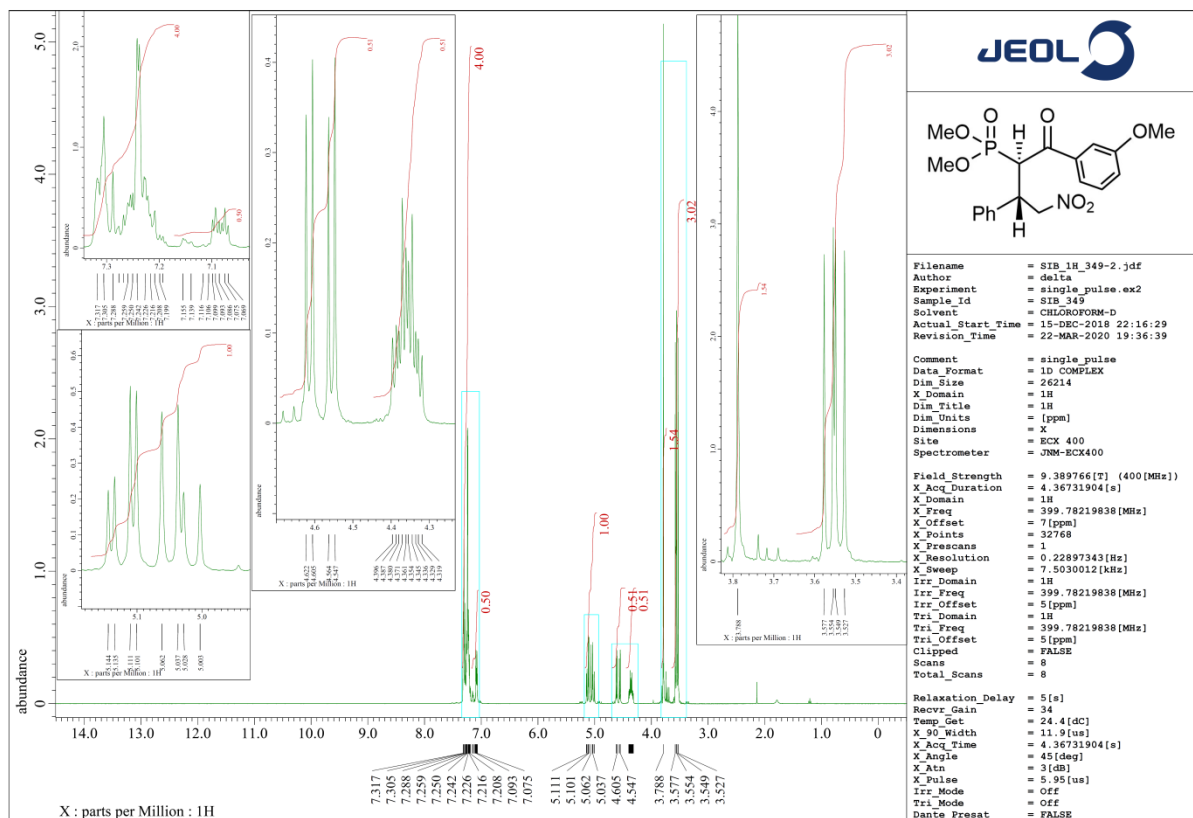



<sup>13</sup>C NMR spectra of dimethyl [(2*R*,3*S*)-1-(3-methoxyphenyl)-4-nitro-1-oxo-3-phenylbutan-2-yl]phosphonate (**6c**) in CDCl<sub>3</sub>

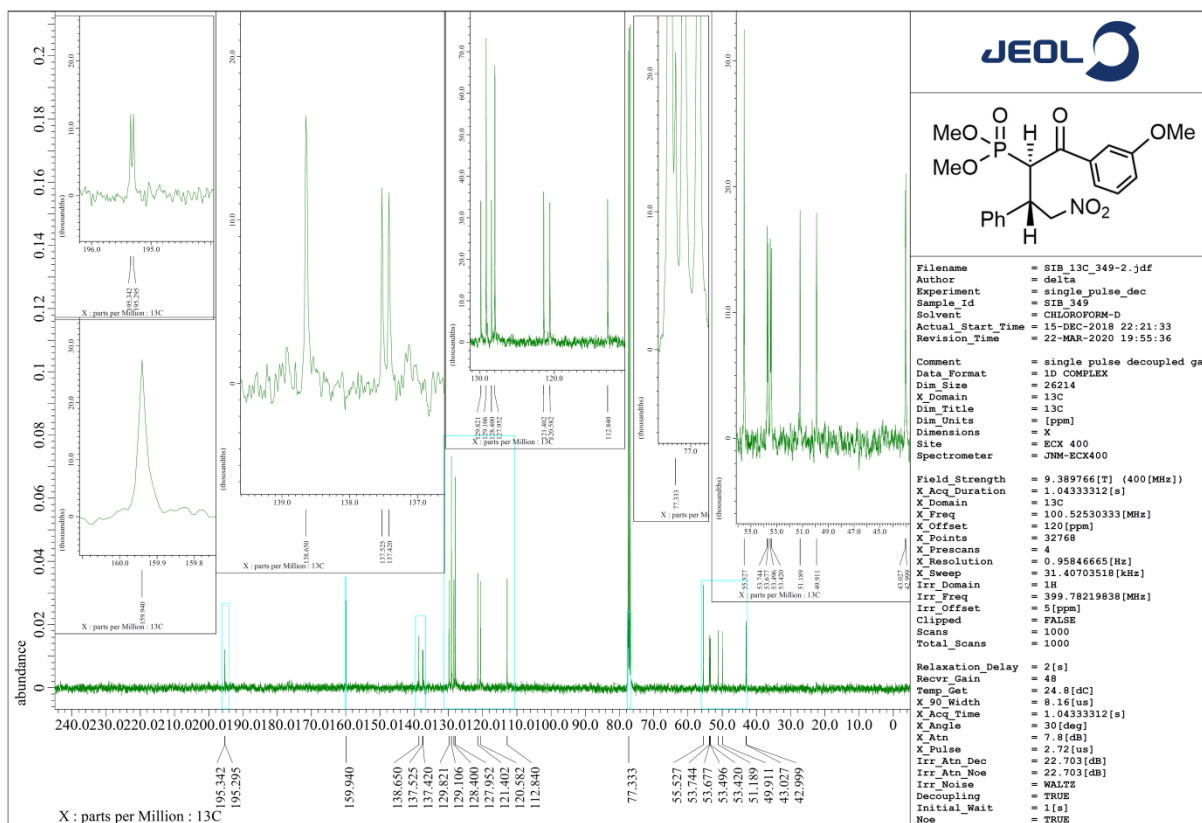

<sup>31</sup>P NMR spectra of dimethyl [(2*R*,3*S*)-1-(3-methoxyphenyl)-4-nitro-1-oxo-3-phenylbutan-2-yl]phosphonate (**6c**) in CDCl<sub>3</sub>

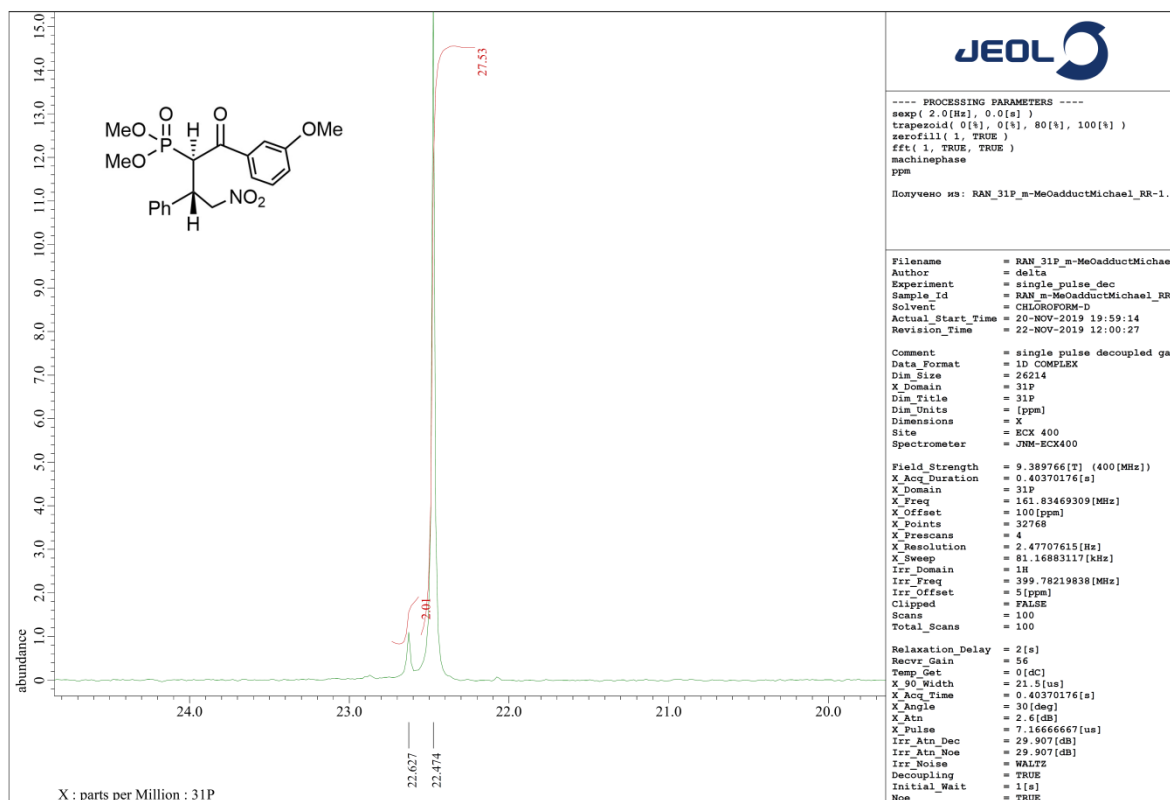



HRMS of dimethyl [(2*R*,3*S*)-1-(3-methoxyphenyl)-4-nitro-1-oxo-3-phenylbutan-2-yl]phosphonate (**6c**)

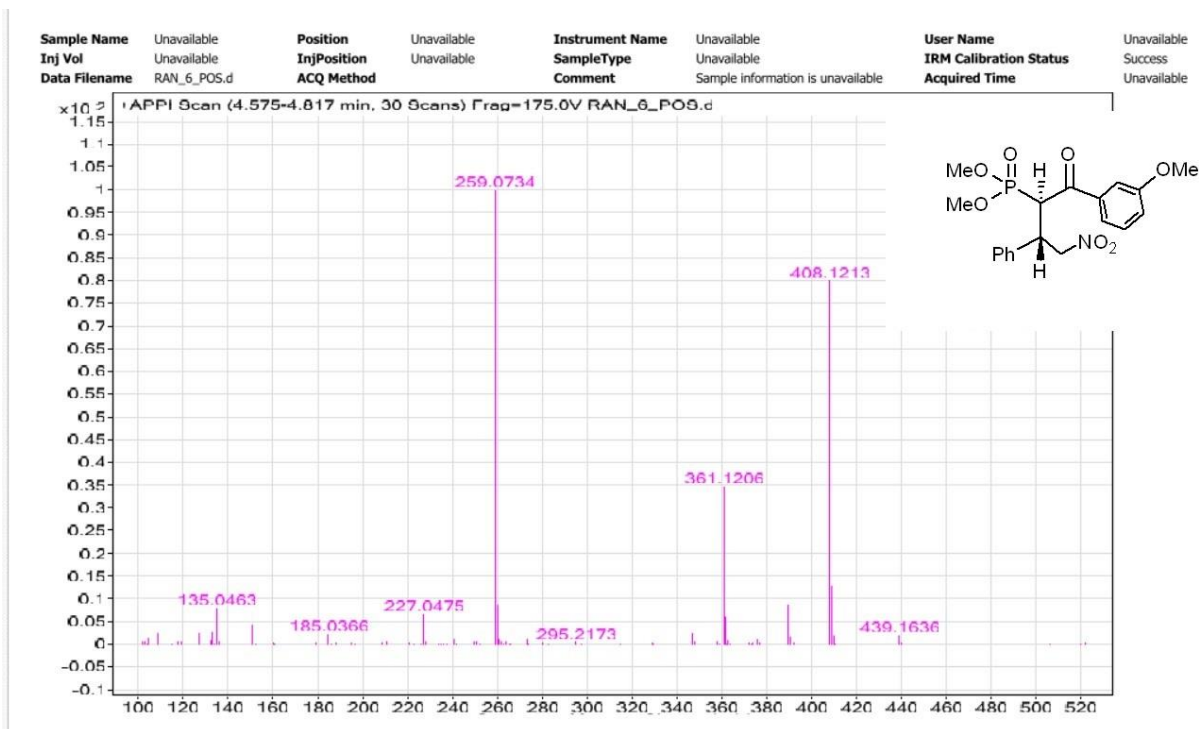

FTIR spectra of dimethyl [(2*R*,3*R*)-1-(3-methoxyphenyl)-4-nitro-1-oxo-3-phenylbutan-2-yl]phosphonate (**6c**)

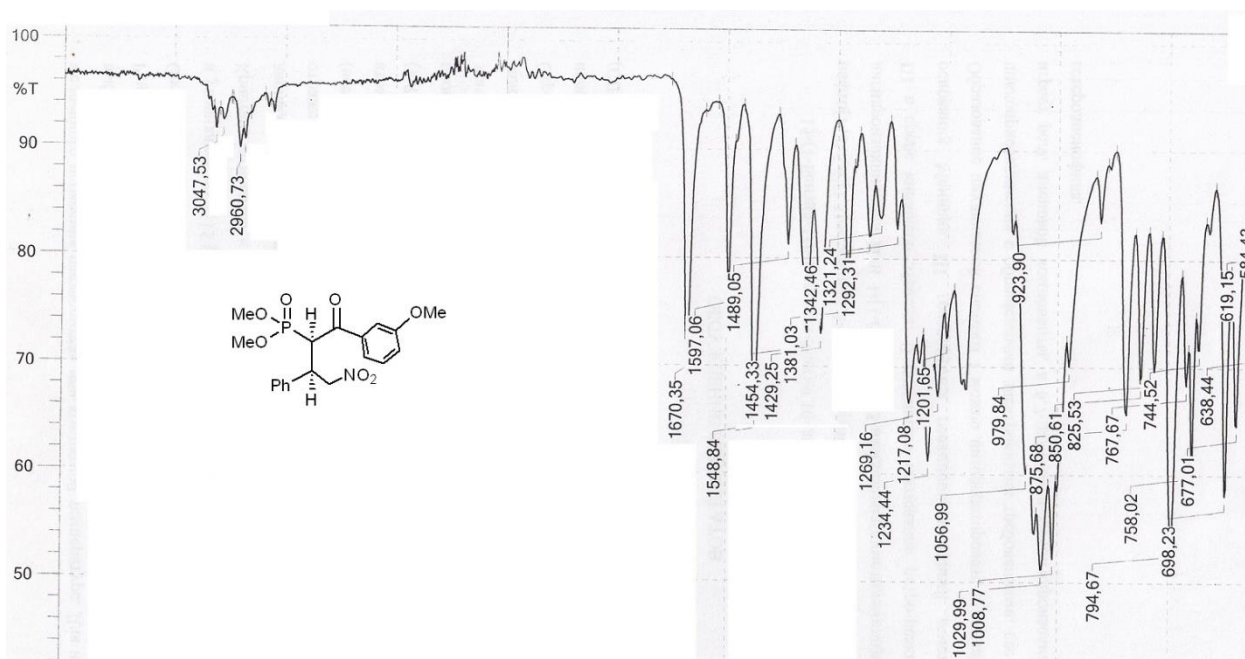



<sup>1</sup>H NMR spectra of dimethyl [(2*R*,3*R*)-1-(3-methoxyphenyl)-4-nitro-1-oxo-3-phenylbutan-2-yl]phosphonate  
(**6c**) in CDCl<sub>3</sub>

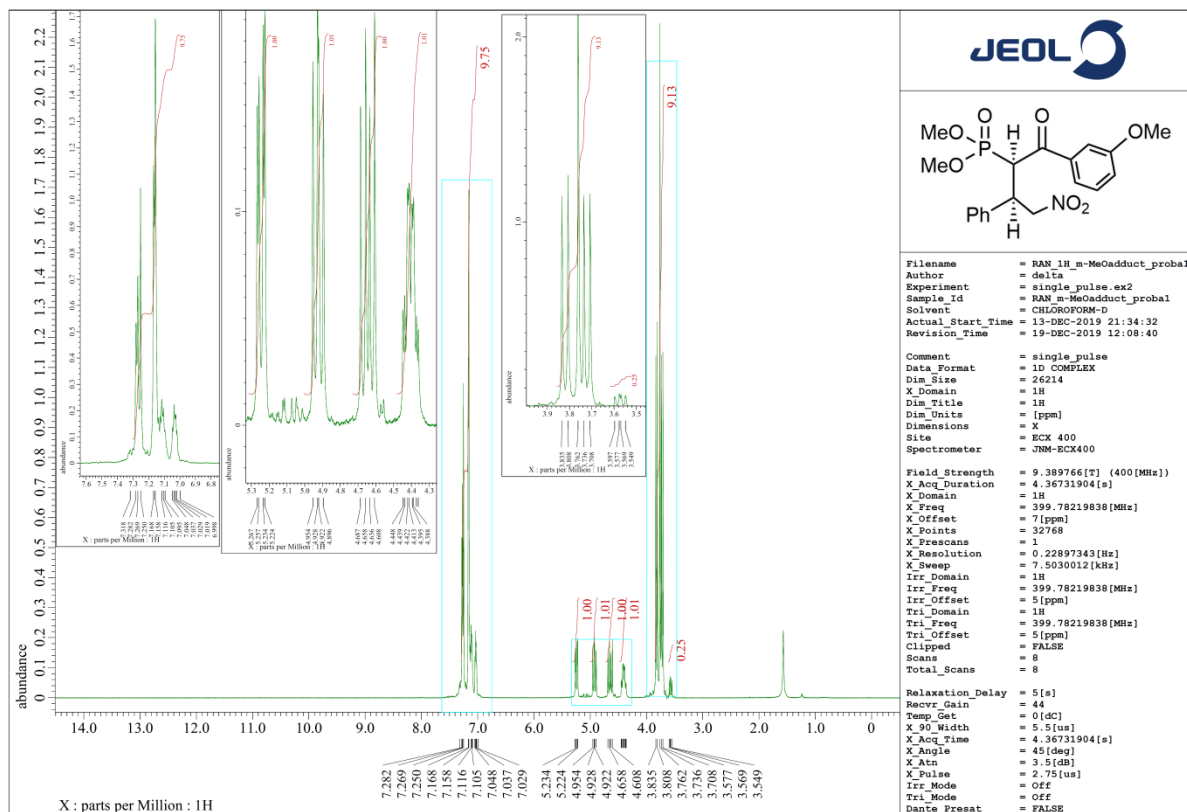

<sup>13</sup>C NMR spectra of dimethyl [(2*R*,3*R*)-1-(3-methoxyphenyl)-4-nitro-1-oxo-3-phenylbutan-2-yl]phosphonate (**6c**) in CDCl<sub>3</sub>

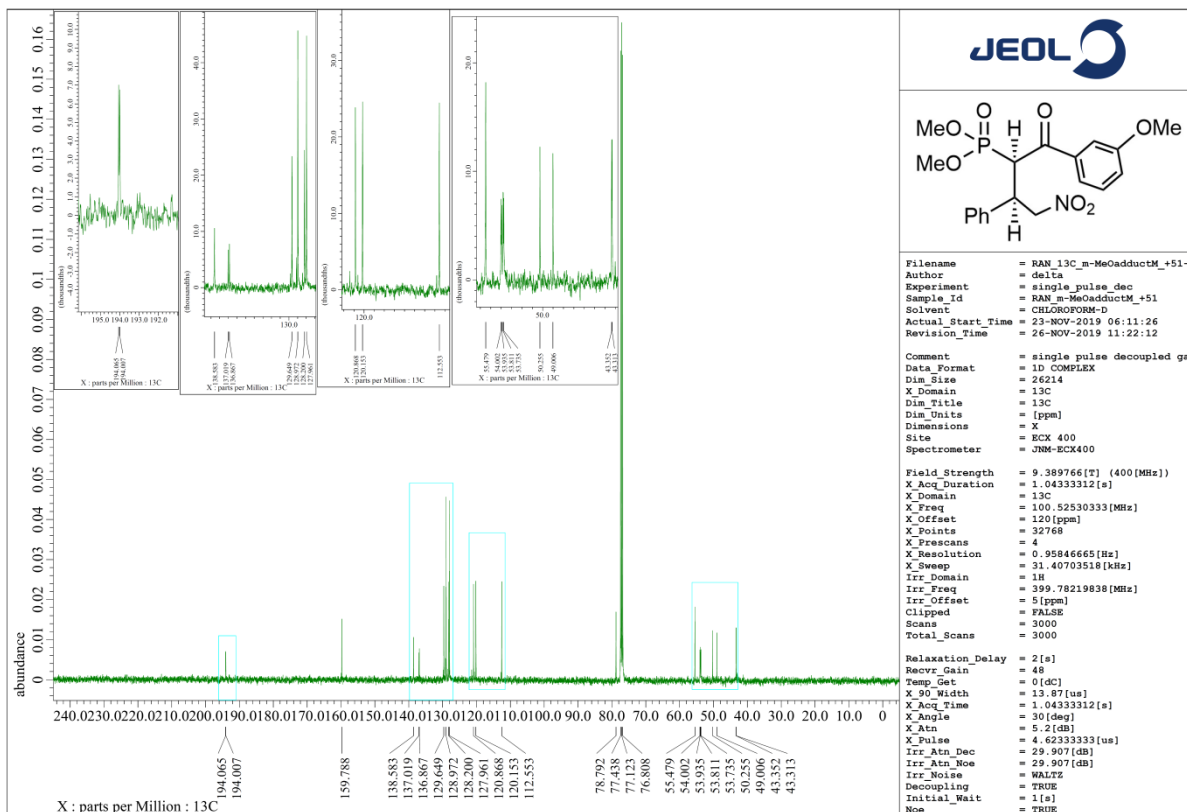



**Chemical Structure:** (S)-1-methoxy-2-phenyl-3-nitropropan-1-ol

**13C NMR Spectrum Data:**

| Chemical Shift (ppm) | Assignment          |
|----------------------|---------------------|
| 129.830              | Aromatic C-O        |
| 129.649              | Aromatic C-O        |
| 129.125              | Aromatic C-O        |
| 128.972              | Aromatic C-O        |
| 128.419              | Aromatic C-O        |
| 128.200              | Aromatic C-O        |
| 127.961              | Aromatic C-O        |
| 121.411              | Aromatic C-O        |
| 120.868              | Aromatic C-O        |
| 120.620              | Aromatic C-O        |
| 120.153              | Aromatic C-O        |
| 112.811              | Aromatic C-O        |
| 112.553              | Aromatic C-O        |
| 78.801               | CH-OH               |
| 55.489               | CH-OCH <sub>3</sub> |
| 54.011               | CH-OCH <sub>3</sub> |
| 53.944               | CH-OCH <sub>3</sub> |
| 53.811               | CH-OCH <sub>3</sub> |
| 53.754               | CH-OCH <sub>3</sub> |
| 50.255               | CH-OCH <sub>3</sub> |
| 49.006               | CH-OCH <sub>3</sub> |
| 43.456               | CH-OCH <sub>3</sub> |
| 43.313               | CH-OCH <sub>3</sub> |

**Acquisition Parameters:**

|                   |                            |
|-------------------|----------------------------|
| Filename          | = RAM_DEPT135_m-MeOadductM |
| Author            | = de1ta                    |
| Experiment        | = dept.ex2                 |
| Sample_Id         | = RAM_m-MeOadductM +51     |
| Solvent           | = CHLOROFORM-D             |
| Actual_Start_Time | = 23-NOV-2019 08:44:02     |
| Revision_Time     | = 26-NOV-2019 11:33:14     |
| Comment           | = DEPT with decoupling     |
| Data Format       | = 1D COMPLEX               |
| Dim_Size          | = 26214                    |
| X_Domain          | = 13C                      |
| Dim_Title         | = 13C                      |
| Dim_Units         | = [ppm]                    |
| Dimensions        | = X                        |
| Site              | = BCK 400                  |
| Spectrometer      | = JNM-ECX400               |
| Field_Strength    | = 9.399766 [T] (400 [MHz]) |
| X_Acq_Duration    | = 1.04333312[s]            |
| X_Domain          | = 13C                      |
| X_Freq            | = 100.52530333 [MHz]       |
| X_Offset          | = 120 [ppm]                |
| X_Points          | = 32768                    |
| X_Prescans        | = 4                        |
| X_Resolution      | = 0.95846665 [Hz]          |
| X_Sweep           | = 31.40703518 [kHz]        |
| Irr_Domain        | = 1H                       |
| Irr_Freq          | = 399.78219838 [MHz]       |
| Irr_Offset        | = 5 [ppm]                  |
| Clipped           | = FALSE                    |
| Scans             | = 2000                     |
| Total_Scans       | = 2000                     |
| Relaxation_Delay  | = 2[s]                     |
| Recvr_Gain        | = 46                       |
| Temp_Set          | = 0 [C]                    |
| X_Acq_Time        | = 1.04333312[s]            |
| X_Atn             | = 5.2 [dB]                 |
| X_Pulse           | = 13.87 [us]               |
| Irr_Atn           | = 3.5 [dB]                 |
| Irr_Atn_Dec       | = 29.907 [dB]              |
| Irr_Noise         | = WALTZ                    |
| Irr_Pulse         | = 5.5 [us]                 |
| Decoupling        | = TRUE                     |
| Initial_Wait      | = 1[s]                     |
| O_Constant        | = 140 [Hz]                 |
| Selection_Angle   | = 140 [deg]                |

**JEOL**

Chemical structure of compound 15-35:

COC(=O)C(COP(=O)(OC)OC)Cc1ccc(OC)cc1[N+](=O)[O-]

NMR Spectrum Data:

| Trace Color | Peak Label | Chemical Shift (ppm) |
|-------------|------------|----------------------|
| Green       | -          | 22.627               |
| Green       | -          | 22.489               |
| Red         | 15-35      | ~22.6                |
| Red         | 1.94       | 1.94                 |

X : parts per Million : 31P

```

---- PROCESSING PARAMETERS ----
sweep: 2.0[Hz], 0.0[s]
trapzoid: 0[%], 0[%], 80[%], 100[%] )
zerofill: ( 1, TRUE )
fft: ( 1, TRUE, TRUE )
machinphase
ppm

Получено из: RAN_31P_m-MeOadductM_+51-1.jdf

Filename      = RAN_31P_m-MeOadductM_+51-1.jdf
Author       = 
Experiment   = single_pulse_dec
Sample_Id    = RAN_m-MeOadductM_+51.5
Solvent      = CHLOROFORM-D
Actual_Start_Time = 20-NOV-2019 23:52:53
Revision_Time  = 21-NOV-2019 16:45:54

Comment      = single pulse decoupled g
Data Format   = 1D COMPLEX
Dim_Size     = 26214
X_Domain     = 31P
Dim_Title    = 31P
Dim_Units    = [ppm]
Dimensions   = X
Site         = BCK 400
Spectrometer = JNM-ECK400

Field_Strength = 9.389766[T] (400[MHz])
X_AcqDuration  = 0.40370176[s]
X_Domain      = 31P
X_Freq        = 161.83469309[MHz]
X_Offset      = 100[ppm]
X_Points      = 32768
X_Prescans    = 4
X_Resolution  = 2.47707615[Hz]
X_Sweep       = 81.16883117[kHz]
Irr_Domain    = 1H
Irr_Freq      = 399.78219838[MHz]
Irr_Offset    = 5[ppm]
Clipped       = FALSE
Scans         = 94
Total_Scans   = 94

Relaxation_Delay = 2[s]
Recvr_Gain       = 56
Temp_Get         = 0[AC]
X_90_Width      = 21.5[us]
X_AcqTime       = 0.40370176[s]
X_Angle         = 30[deg]
X_atn           = 2.6[db]
X_Pulse         = 7.16666667[us]
Irr_Atn_Dec     = 29.907[db]
Irr_Atn_Noise  = 29.907[db]
Irr_Noise      = WALTZ
Decoupling      = TRUE
Initial_Wait    = 1[s]
Noise           = TRUE
  
```



**(6d)**

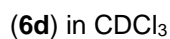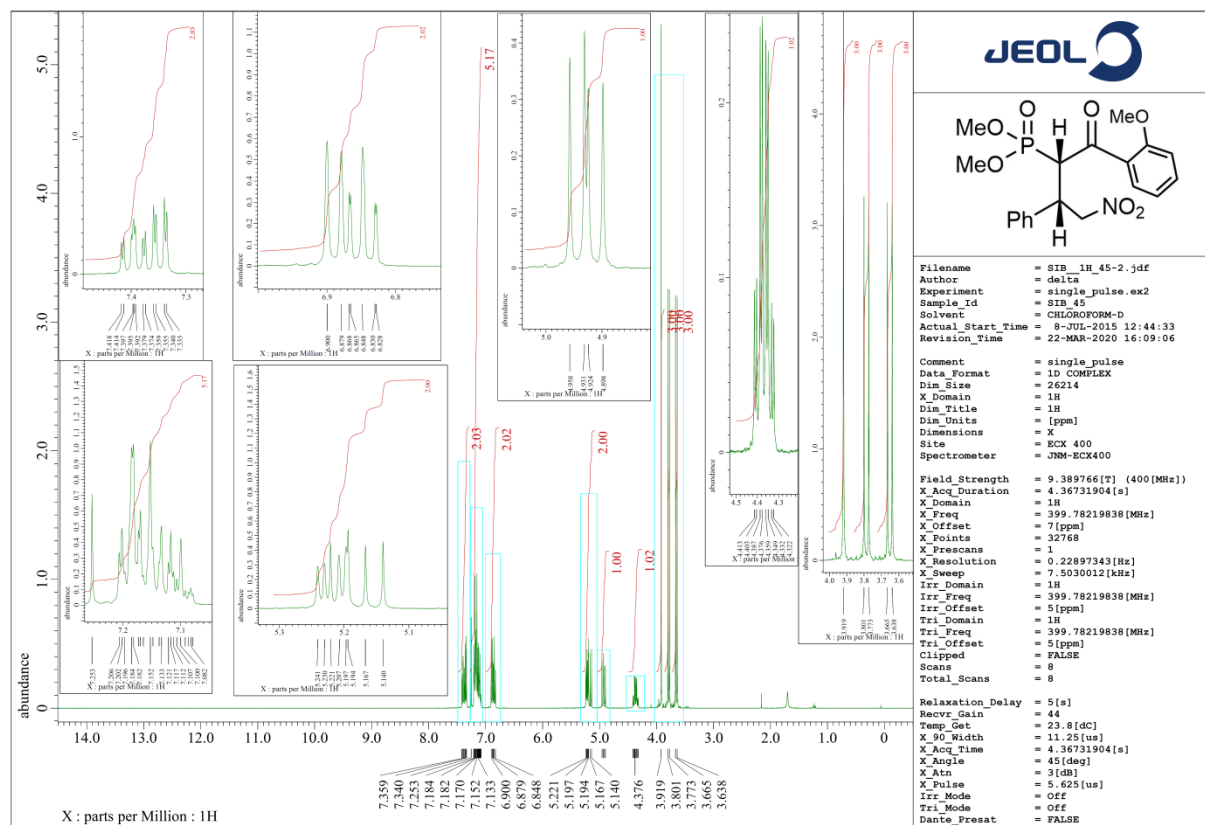



<sup>13</sup>C NMR spectra of dimethyl [(2S,3S)-1-(2-methoxyphenyl)-4-nitro-1-oxo-3-phenylbutan-2-yl]phosphonate (**6d**) in CDCl<sub>3</sub>

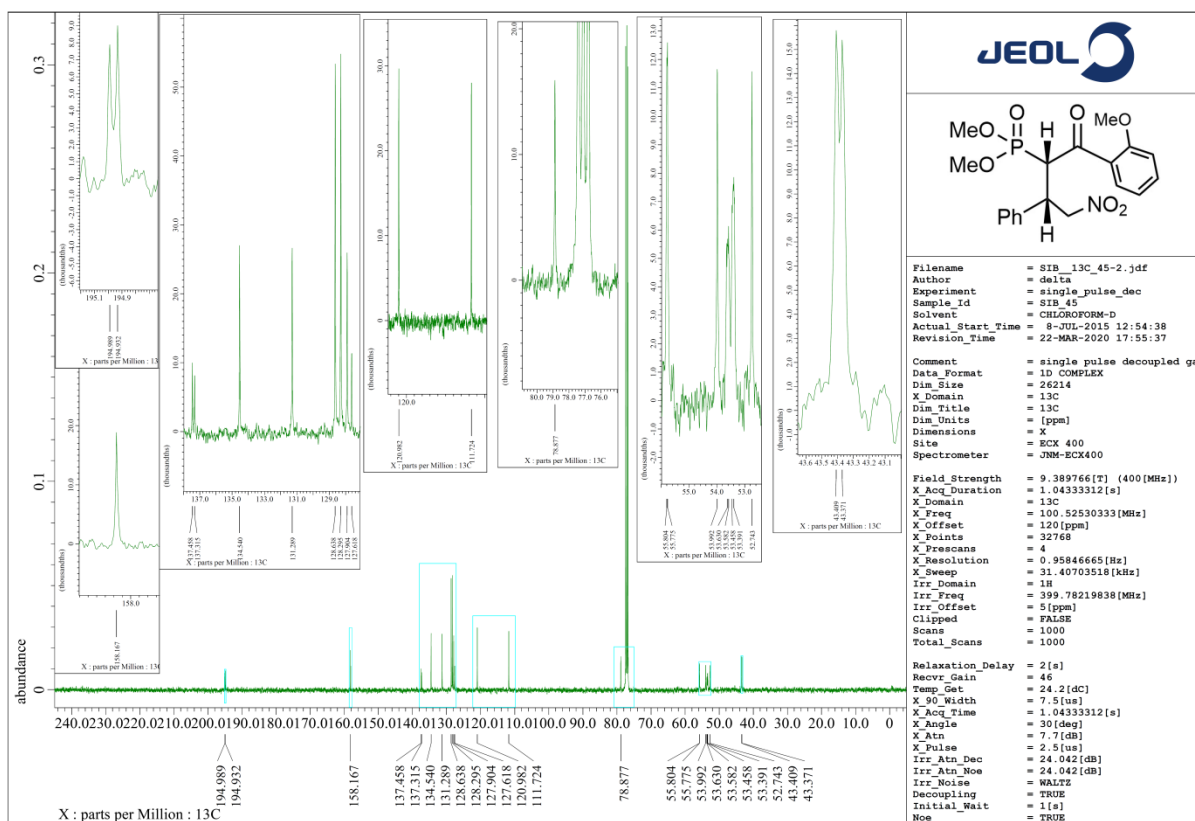

<sup>31</sup>P NMR spectra of dimethyl [(2S,3S)-1-(2-methoxyphenyl)-4-nitro-1-oxo-3-phenylbutan-2-yl]phosphonate (**6d**) in CDCl<sub>3</sub>

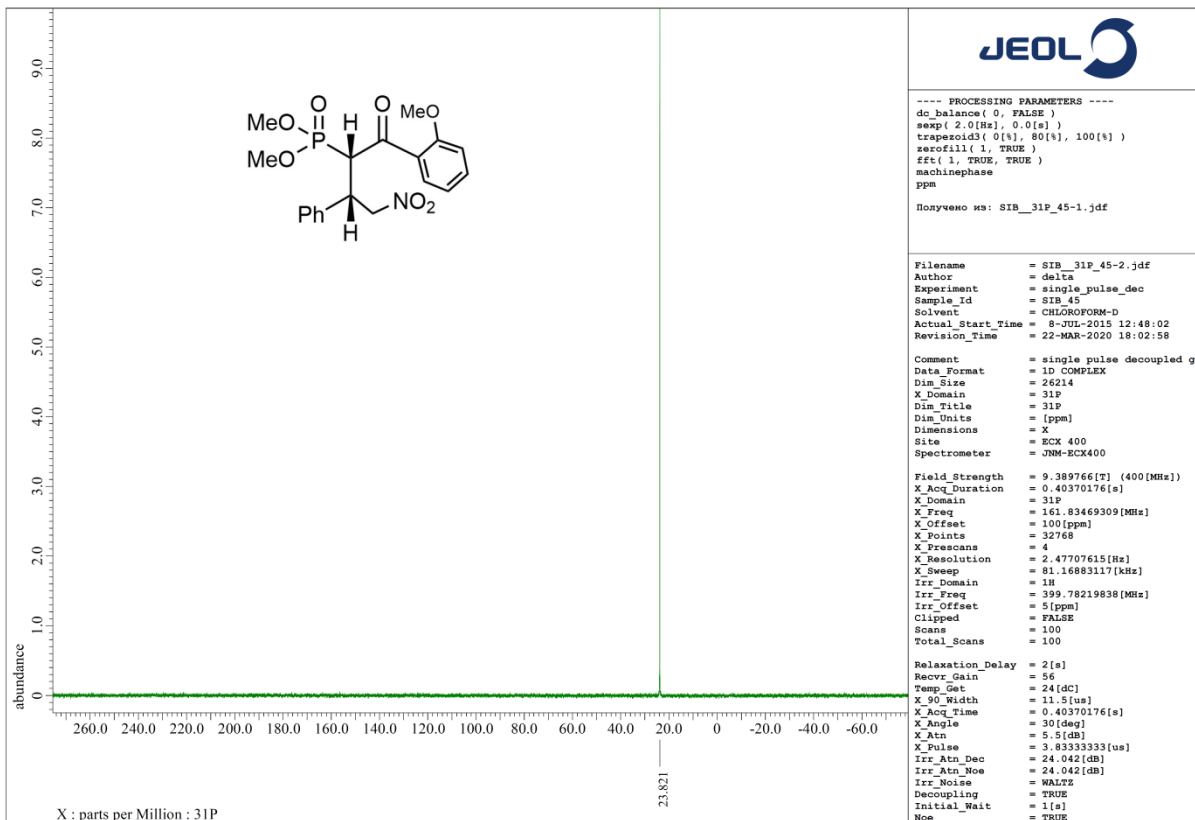



HRMS of dimethyl [(2S,3S)-1-(2-methoxyphenyl)-4-nitro-1-oxo-3-phenylbutan-2-yl]phosphonate (**6d**)

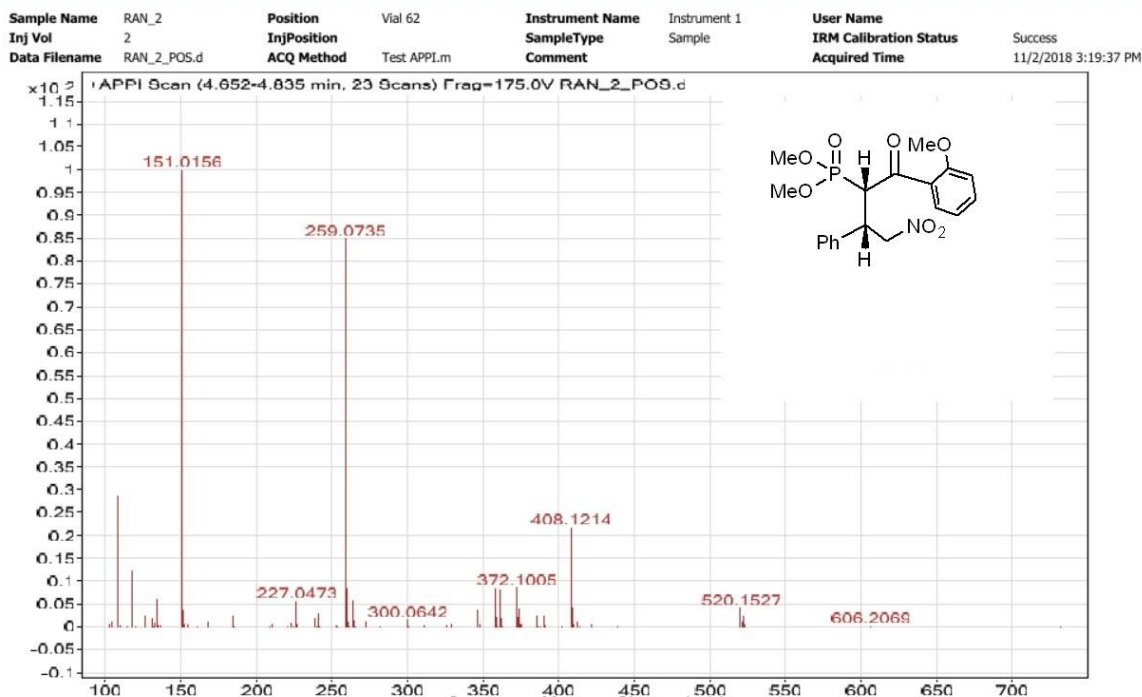

FTIR spectra of dimethyl [(2S,3R)-1-nitro-4-oxo-2-phenylpentan-3-yl]phosphonate (**6e**)

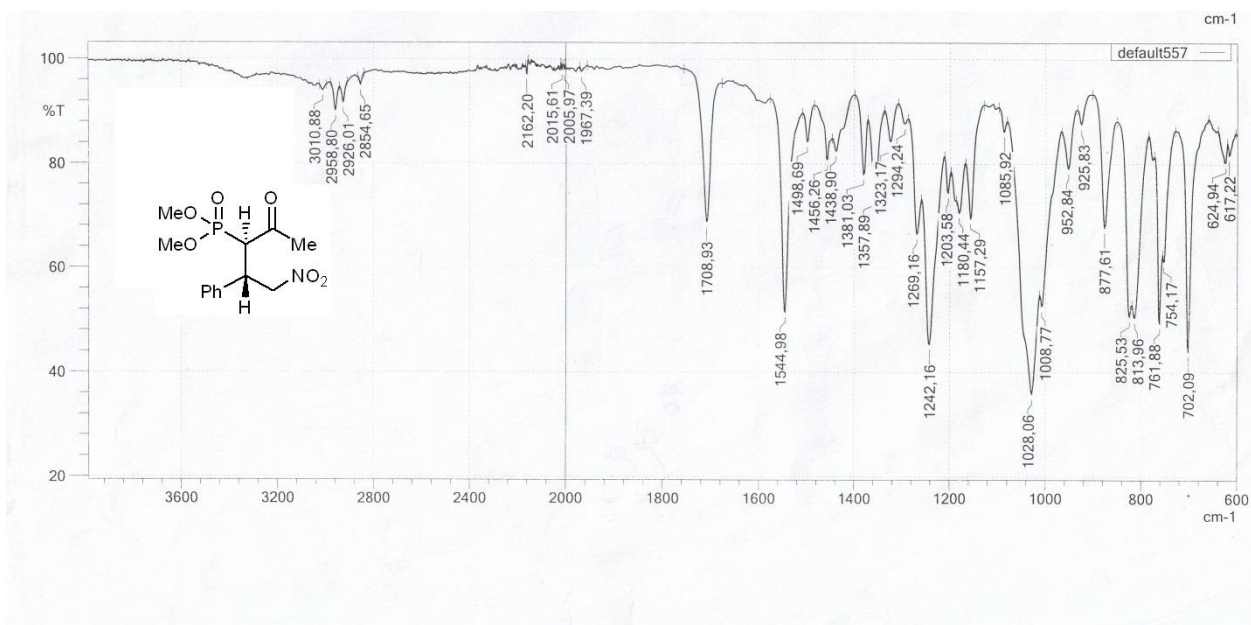



<sup>1</sup>H NMR spectra of dimethyl [(2*S*,3*R*)-1-nitro-4-oxo-2-phenylpentan-3-yl]phosphonate (**6e**) in CDCl<sub>3</sub>

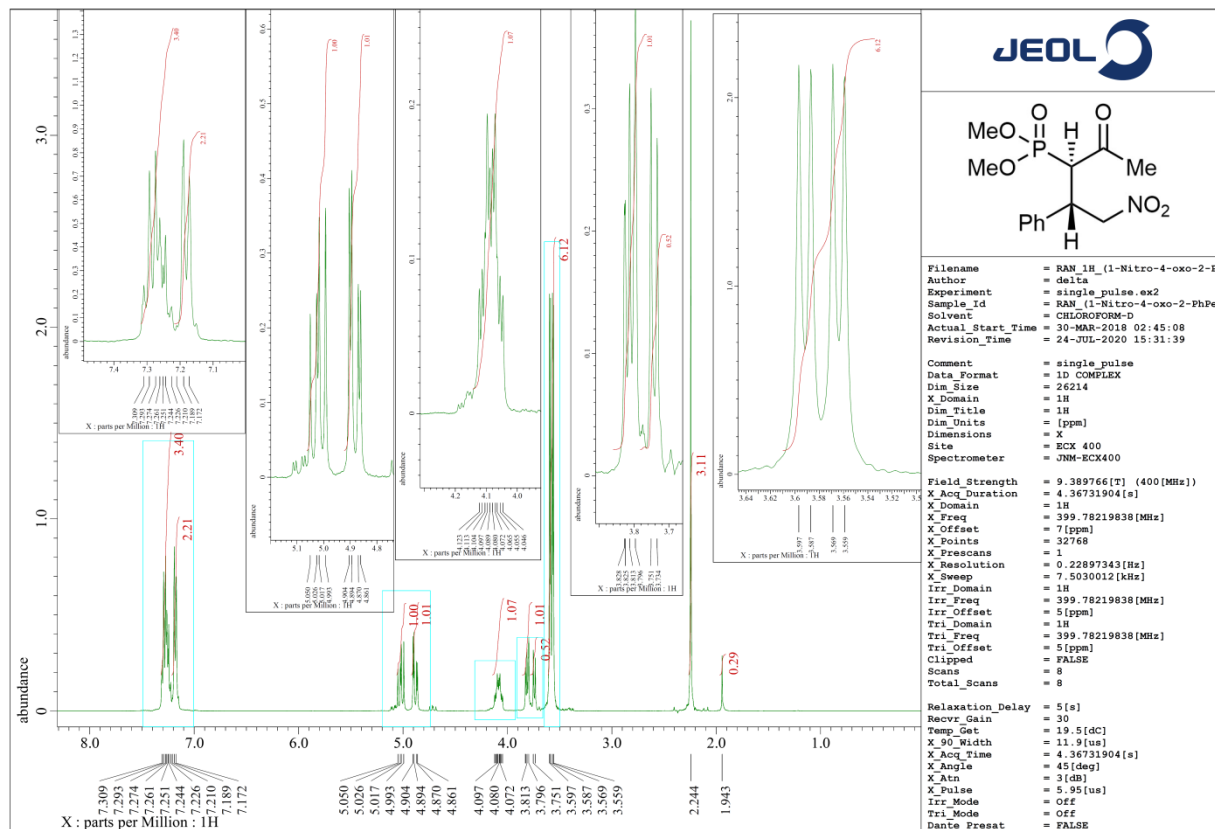

<sup>13</sup>C NMR spectra of dimethyl [(2*S*,3*R*)-1-nitro-4-oxo-2-phenylpentan-3-yl]phosphonate (**6e**) in CDCl<sub>3</sub>

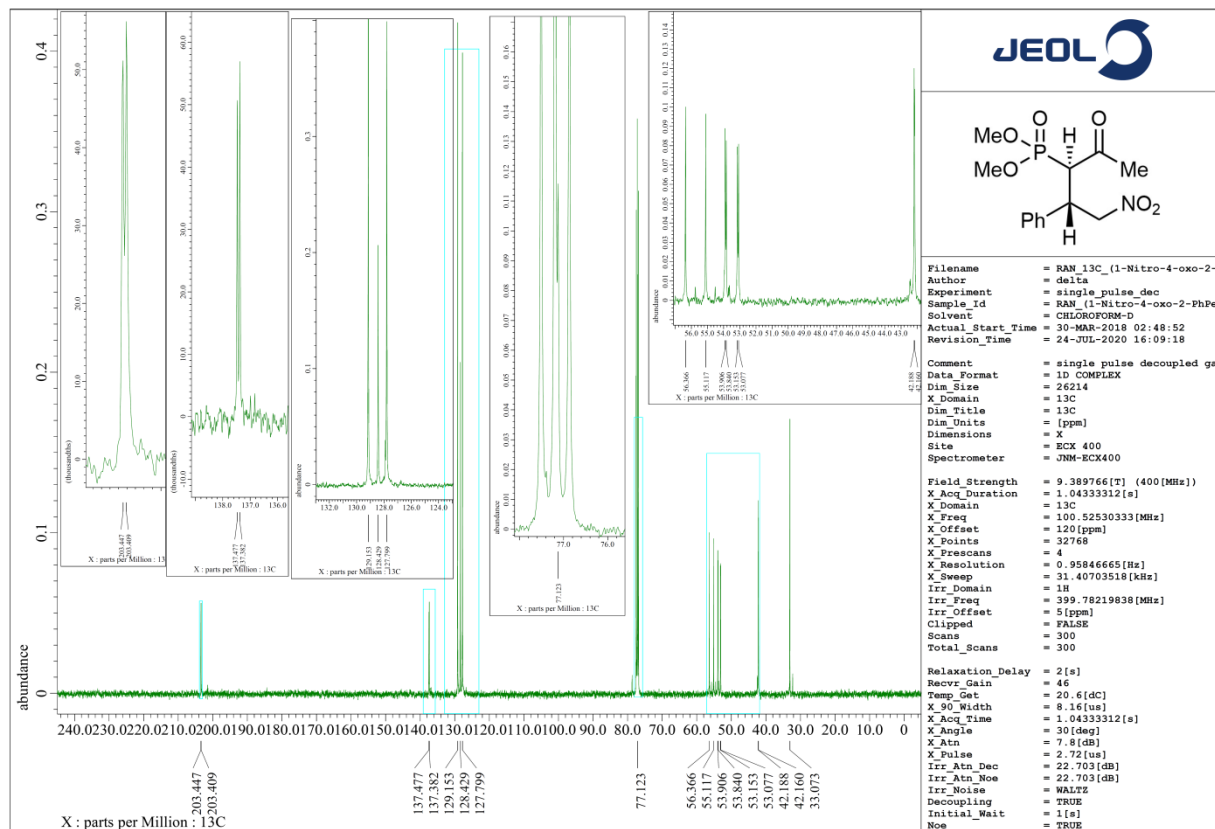



<sup>31</sup>P NMR spectra of dimethyl [(2*S*,3*R*)-1-nitro-4-oxo-2-phenylpentan-3-yl]phosphonate (**6e**) in CDCl<sub>3</sub>

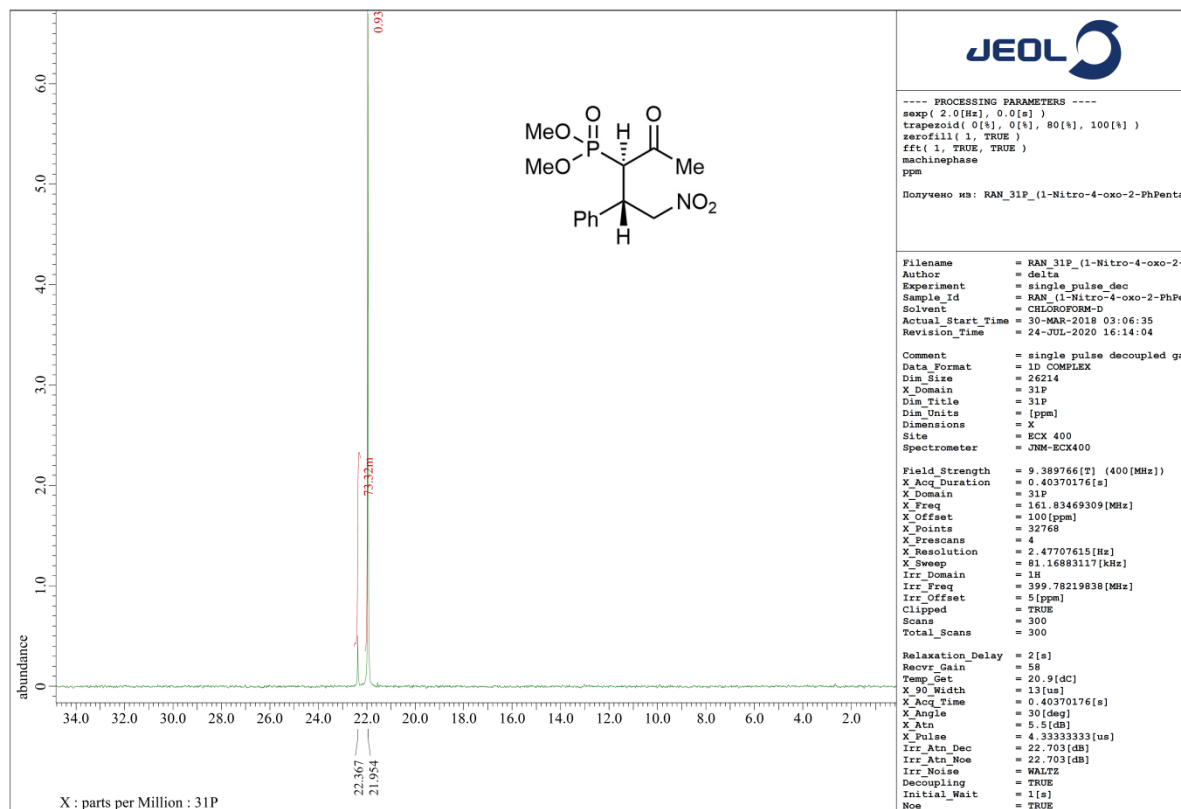

HRMS of dimethyl [(2*S*,3*R*)-1-nitro-4-oxo-2-phenylpentan-3-yl]phosphonate (**6e**)

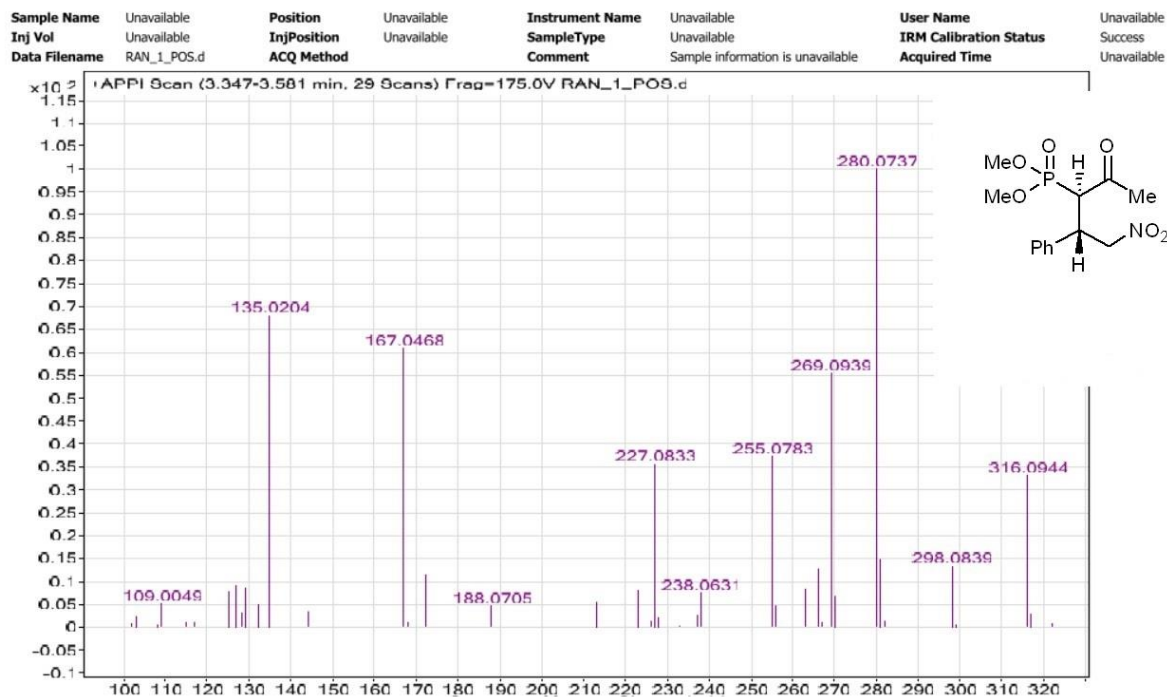



FTIR spectrum of compound **1**. The x-axis represents the wavenumber in cm<sup>-1</sup> (ranging from 3750 to 500), and the y-axis represents the percentage of transmittance (%T, ranging from 30 to 100). The chemical structure of **1** is shown as an inset.

Chemical structure of **1**: COC(=O)[C@H](c1ccccc1)[C@@H](O)C(=O)O

Key FTIR peaks (cm<sup>-1</sup>):

- 3032.10
- 2916.37
- 2854.65
- 1689.64
- 1602.85
- 1546.91
- 1519.91
- 1379.10
- 1344.38
- 1307.74
- 1232.51
- 1176.58
- 1141.86
- 1058.92
- 1016.49
- 999.13
- 979.84
- 867.97
- 821.68
- 812.03
- 775.38
- 759.95
- 744.52
- 702.09
- 590.22
- 555.50
- 528.50
- 495.71
- 412.77
- 408.91

Chemical structure of compound 10: CC(=O)C(Cc1ccccc1)COP(=O)(OC)OC

<sup>1</sup>H NMR spectrum (CDCl<sub>3</sub>) of compound 10. The x-axis represents chemical shift in ppm (delta), ranging from 0 to 10. The y-axis represents abundance. The spectrum shows several peaks: a multiplet at 7.2-7.4 ppm (aromatic protons), a doublet at 6.46 ppm (CH=CH<sub>2</sub>), a multiplet at 5.8-6.0 ppm (CH=CH<sub>2</sub>), a multiplet at 4.0-4.5 ppm (CH<sub>2</sub>), a doublet at 3.82 ppm (CH<sub>2</sub>), a doublet at 3.02 ppm (CH<sub>2</sub>), a doublet at 2.75 ppm (CH<sub>2</sub>), and a doublet at 1.335 ppm (CH<sub>3</sub>). Two insets are provided: one for the aromatic region (7.1-7.3 ppm) and another for the aliphatic region (2.7-3.1 ppm). The chemical structure of compound 10 is shown in the top right corner.



<sup>13</sup>C NMR spectra of dimethyl [(2S,3S)-1-(adamantan-1-yl)-4-nitro-1-oxo-3-phenylbutan-2-yl]phosphonate  
(6f) in CDCl<sub>3</sub>

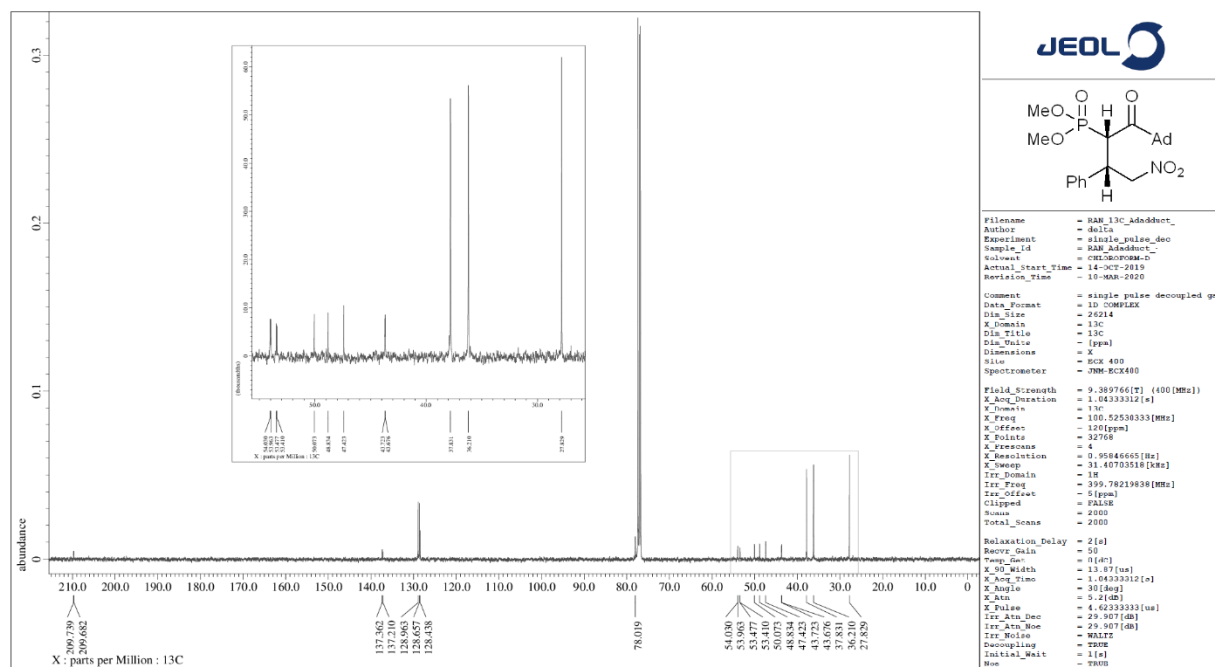

<sup>31</sup>P NMR spectra of dimethyl [(2S,3S)-1-(adamantan-1-yl)-4-nitro-1-oxo-3-phenylbutan-2-yl]phosphonate  
(6f) in CDCl<sub>3</sub>

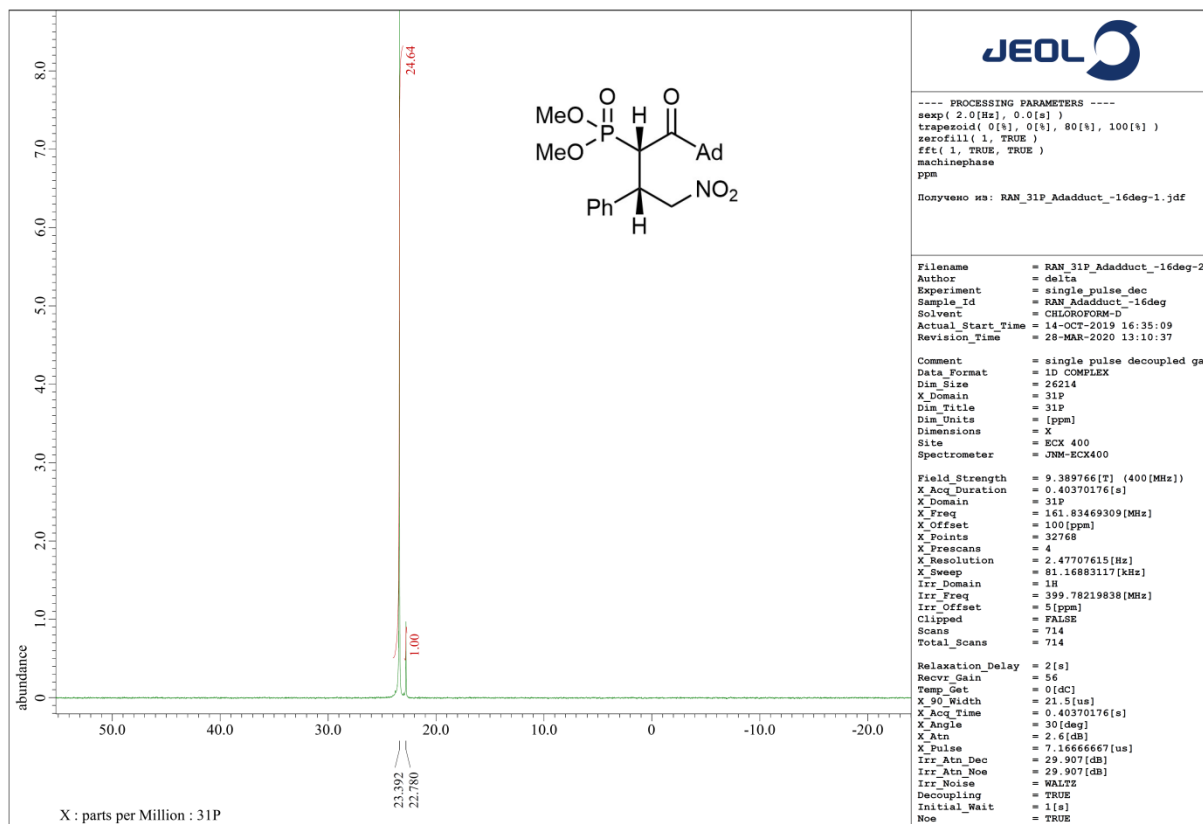



HRMS of dimethyl [(2*S*,3*S*)-1-(adamantan-1-yl)-4-nitro-1-oxo-3-phenylbutan-2-yl]phosphonate (**6f**)

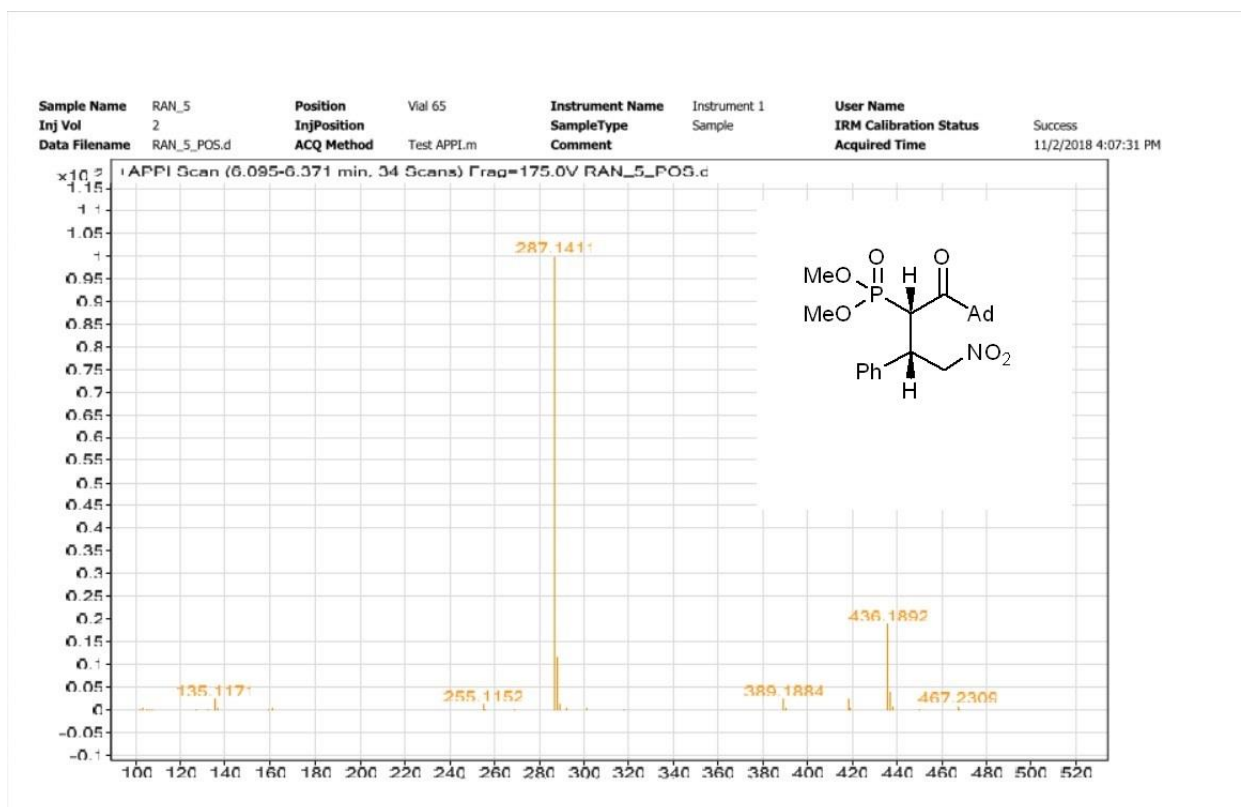

FTIR spectra of dimethyl [(2*R*,3*S*)-1-(adamantan-1-yl)-4-nitro-1-oxo-3-phenylbutan-2-yl]phosphonate (**6f**)

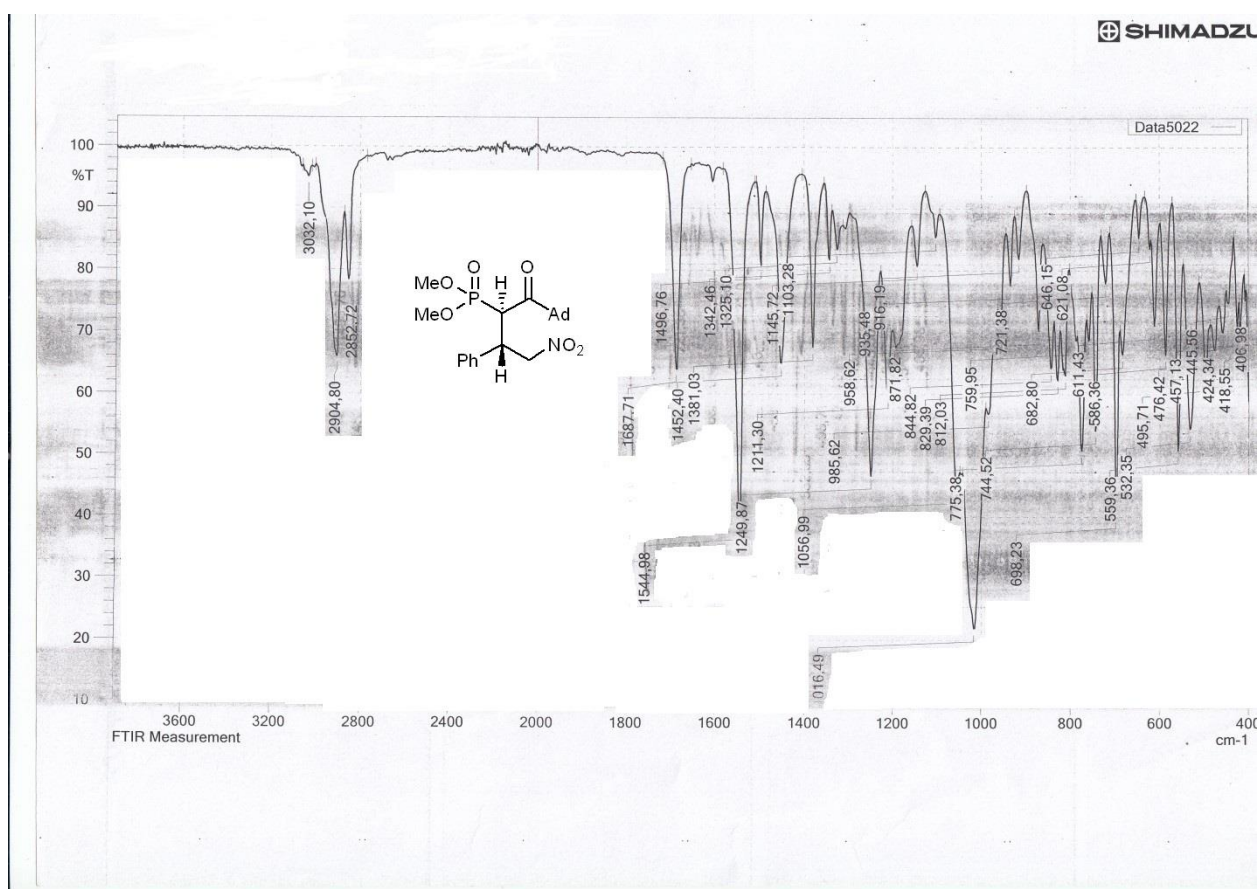



<sup>1</sup>H NMR spectra of dimethyl [(2*R*,3*S*)-1-(adamantan-1-yl)-4-nitro-1-oxo-3-phenylbutan-2-yl]phosphonate  
(**6f**) in CDCl<sub>3</sub>

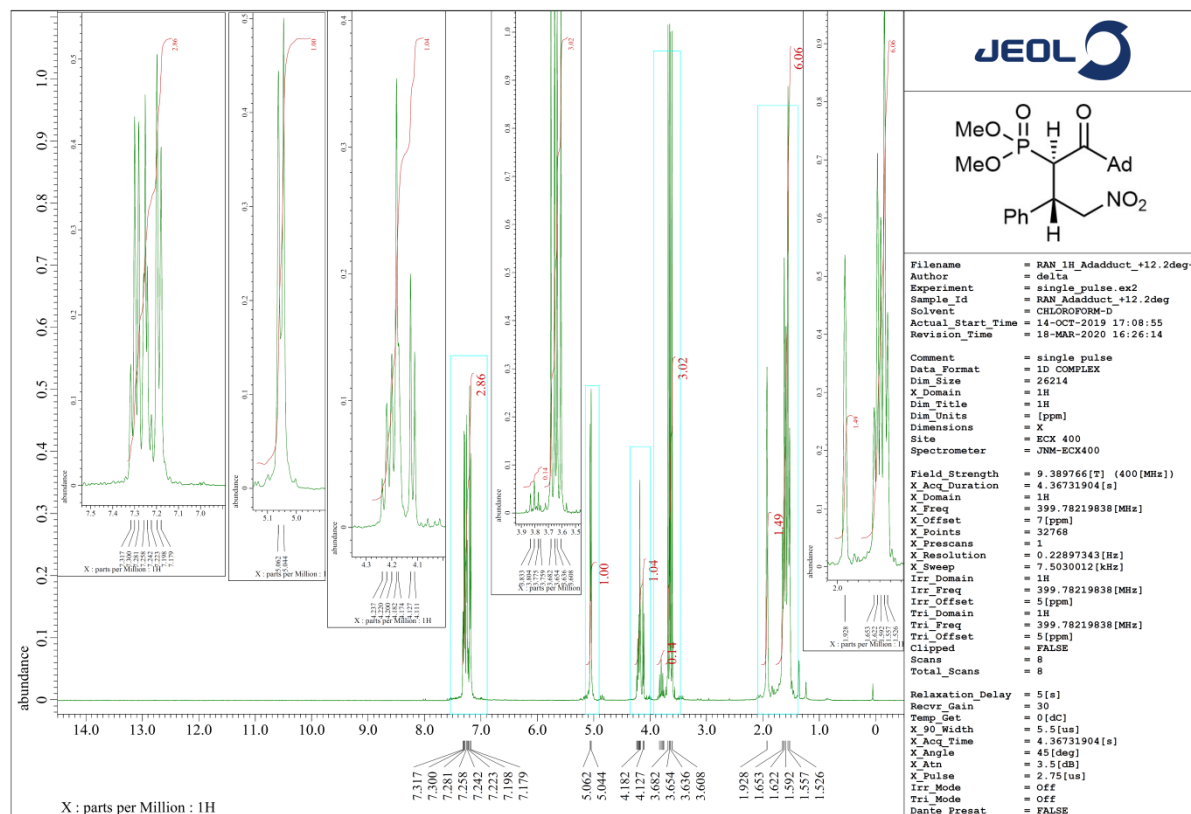

<sup>13</sup>C NMR spectra of dimethyl [(2*R*,3*S*)-1-(adamantan-1-yl)-4-nitro-1-oxo-3-phenylbutan-2-yl]phosphonate  
(**6f**) in CDCl<sub>3</sub>

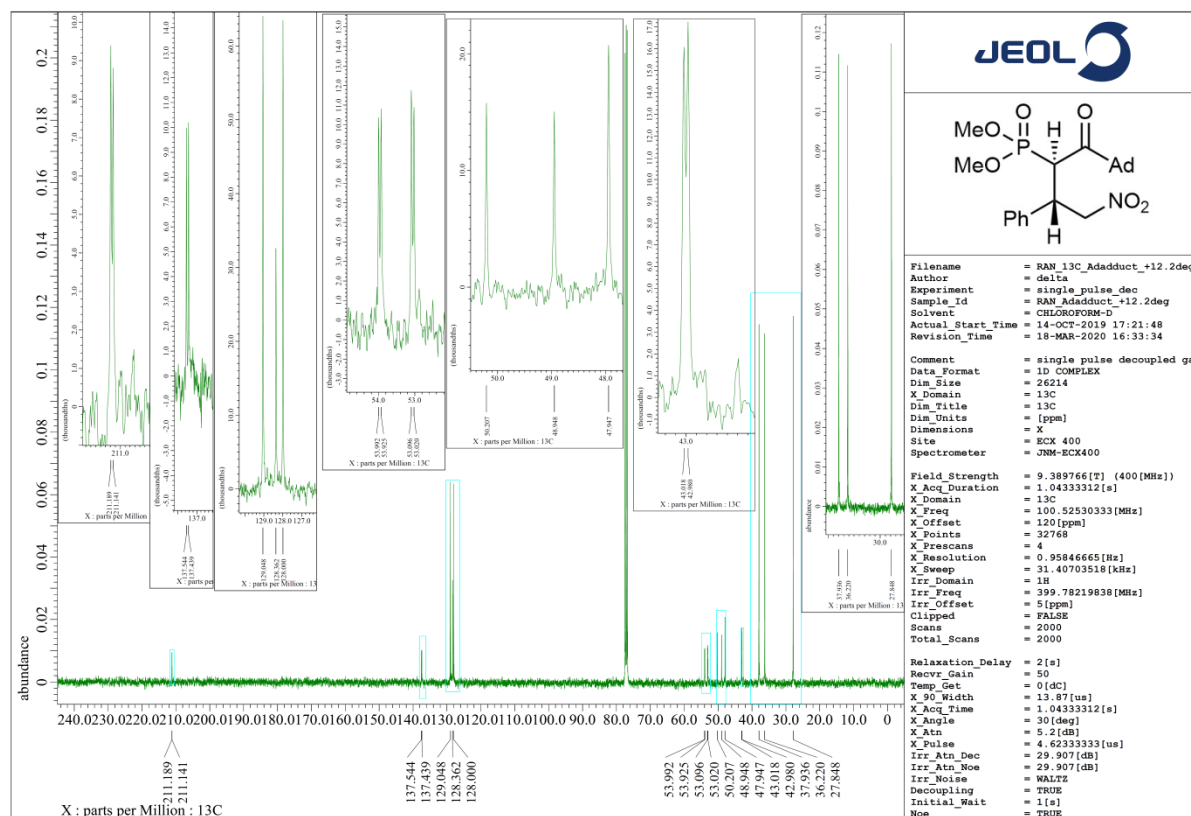



<sup>31</sup>P NMR spectra of dimethyl [(2*R*,3*S*)-1-(adamantan-1-yl)-4-nitro-1-oxo-3-phenylbutan-2-yl]phosphonate

(6f) in CDCl<sub>3</sub>

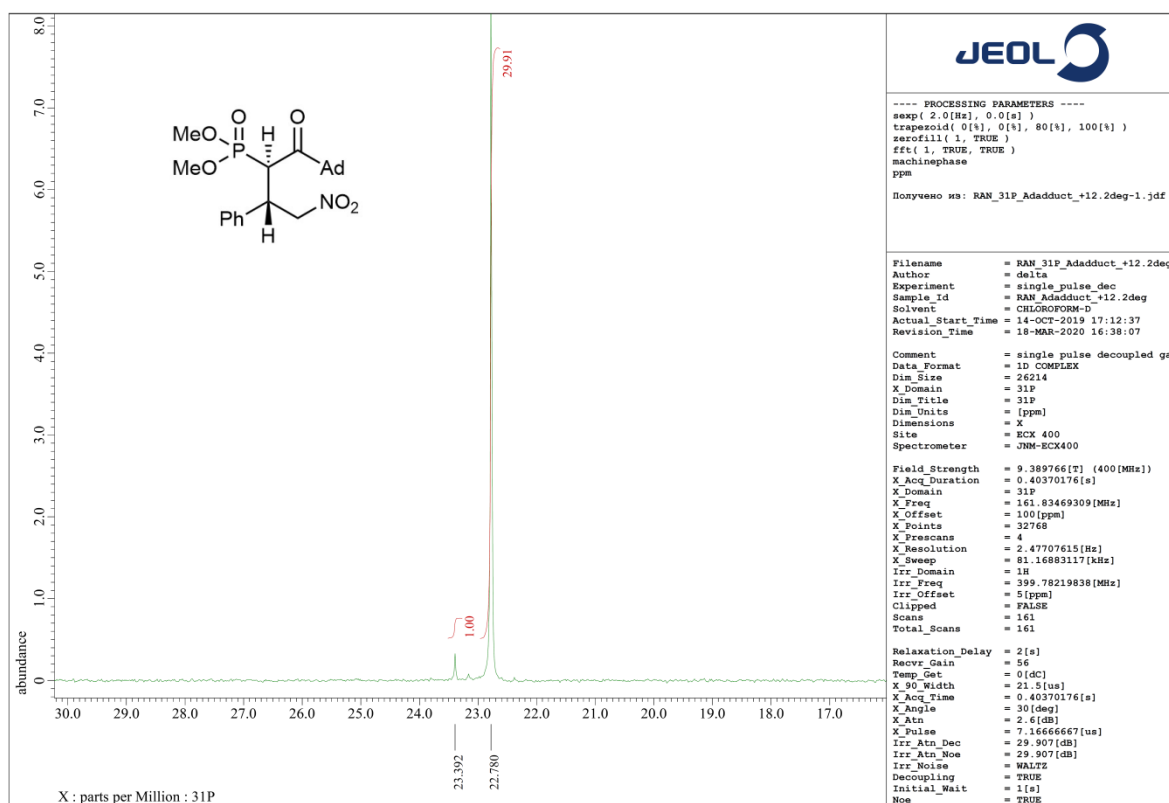



## 8. Copies of NMR, FTIR and mass spectra for compounds 7-14

<sup>1</sup>H NMR spectra of dimethyl [(2*R*,3*R*,4*S*)-2,4-diphenylpyrrolidin-3-yl]phosphonate (**7**)

(crude reaction mixture) in  $\text{CDCl}_3$

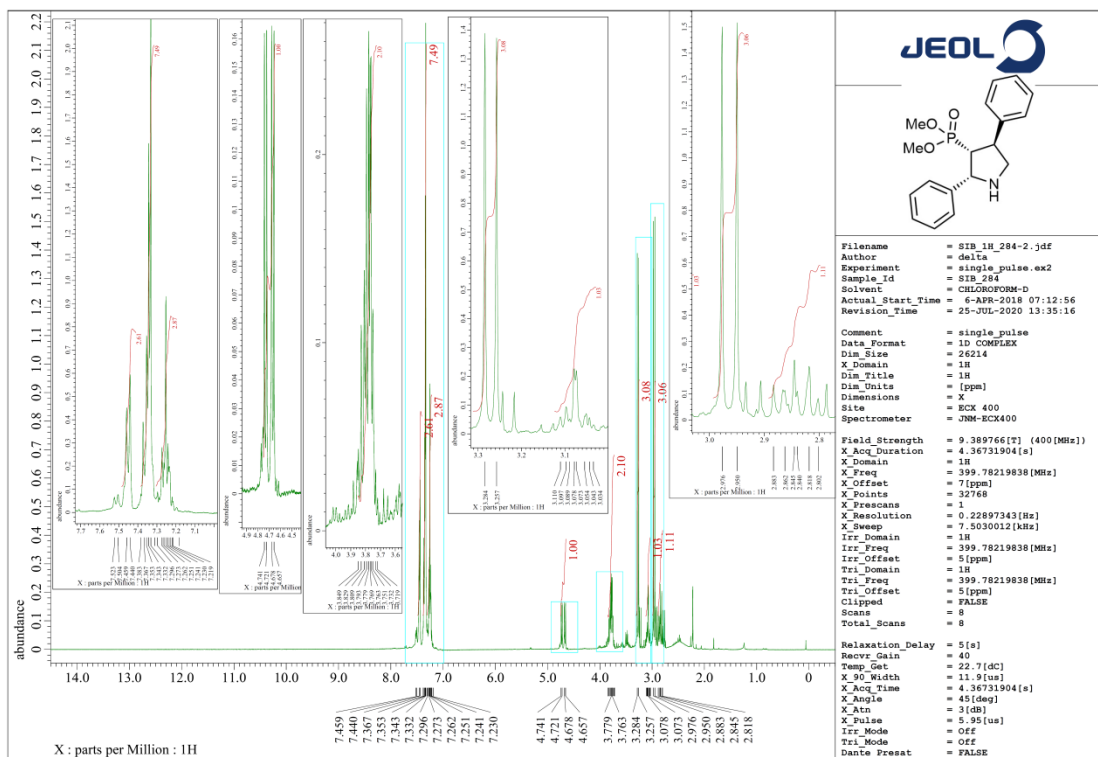<sup>13</sup>C NMR spectra of dimethyl [(2*R*,3*R*,4*S*)-2,4-diphenylpyrrolidin-3-yl]phosphonate (**7**)

in  $\text{CDCl}_3$

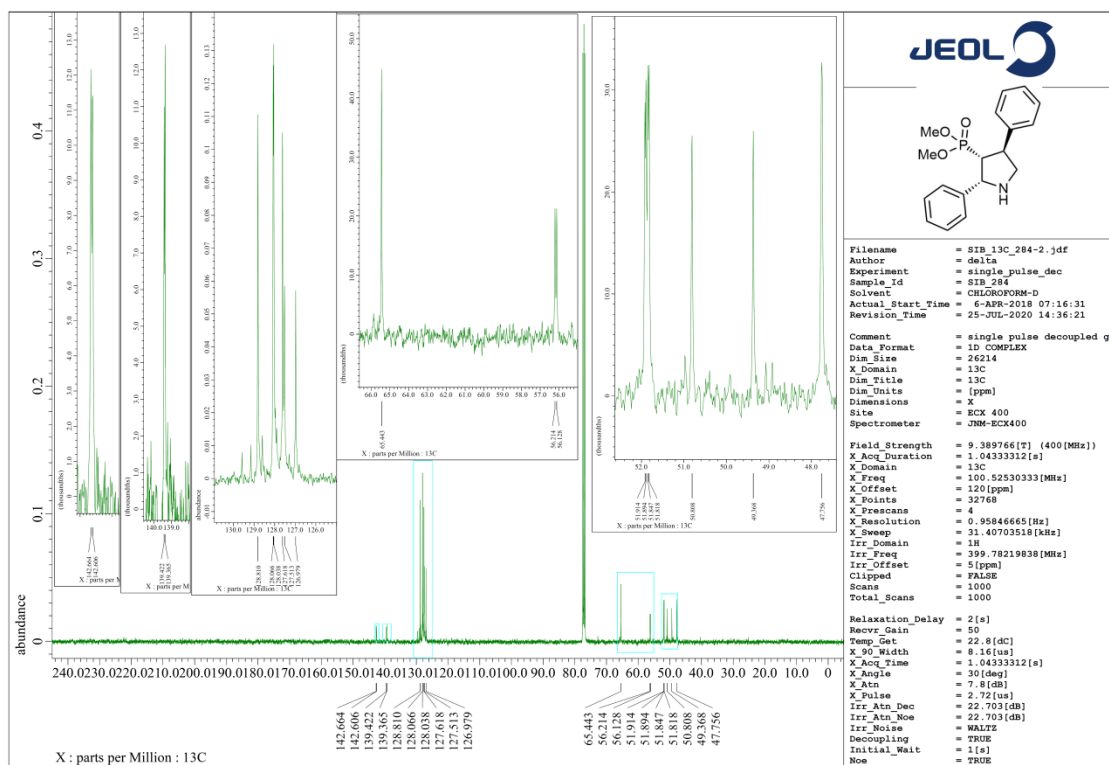



DEPT NMR spectra of dimethyl [(2*R*,3*R*,4*S*)-2,4-diphenylpyrrolidin-3-yl]phosphonate (**7**)

in CDCl<sub>3</sub>

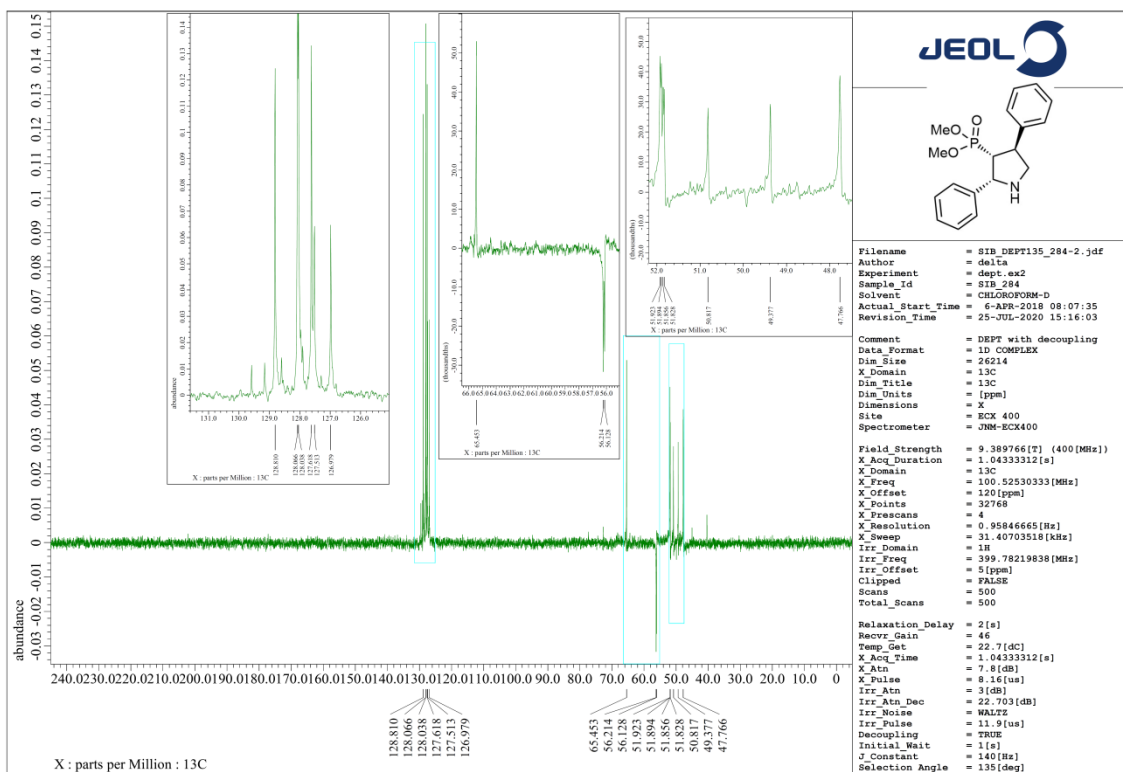

<sup>31</sup>P NMR spectra of dimethyl [(2*R*,3*R*,4*S*)-2,4-diphenylpyrrolidin-3-yl]phosphonate (**7**)

in CDCl<sub>3</sub>

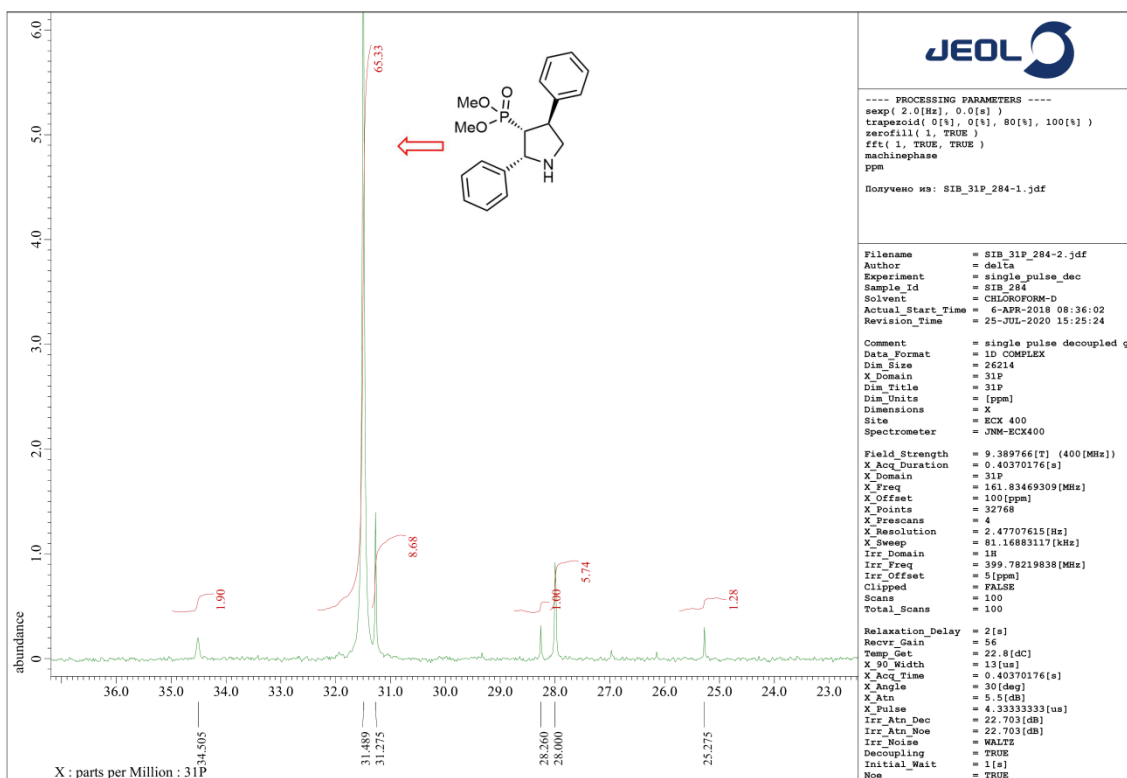



FTIR spectra of dimethyl [(2*R*,3*R*,4*S*)-1-methyl-2,4-diphenylpyrrolidin-3-yl]phosphonate (**8**)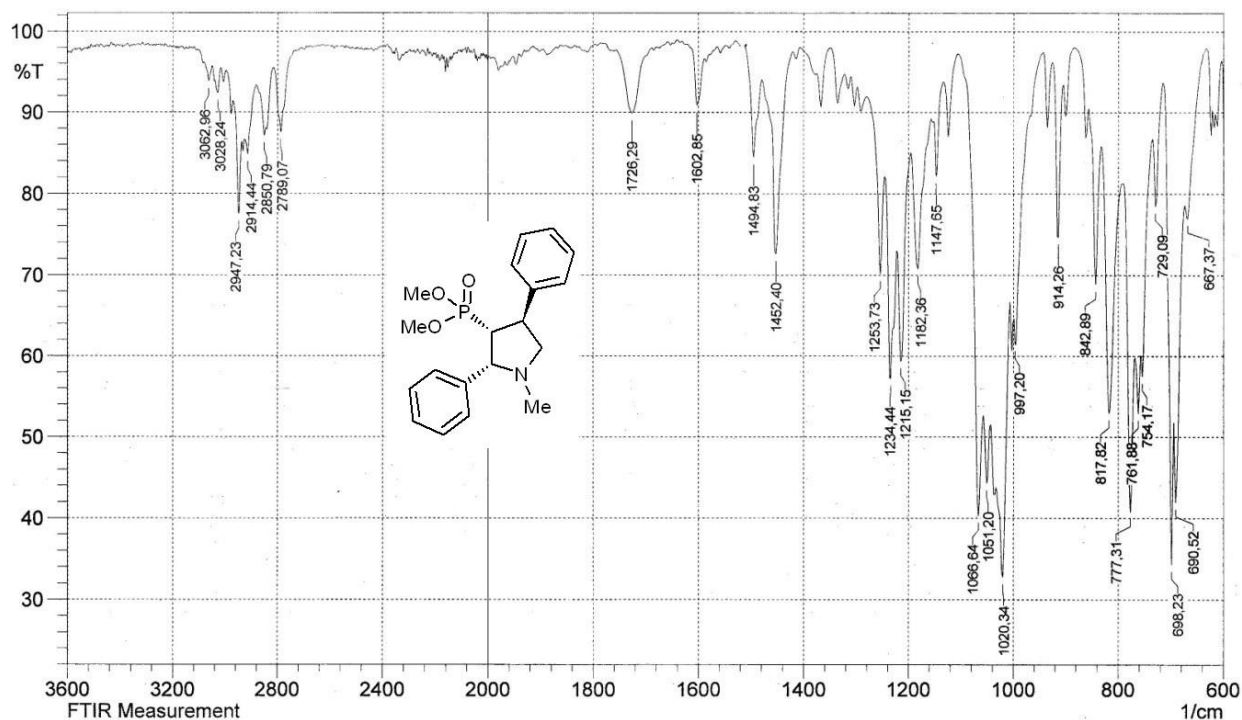

<sup>1</sup>H NMR spectra of dimethyl [(2*R*,3*R*,4*S*)-1-methyl-2,4-diphenylpyrrolidin-3-yl]phosphonate (**8**)

in DMSO-d<sup>6</sup>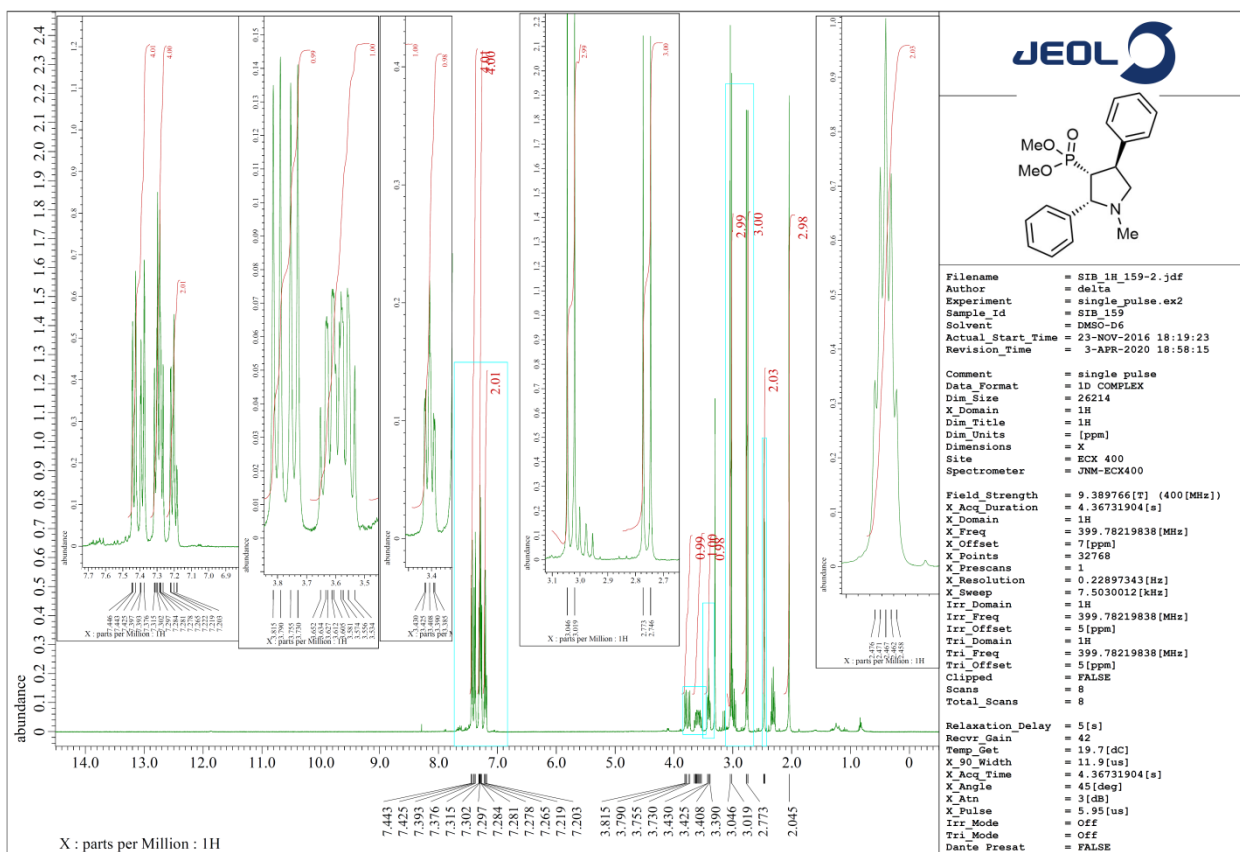



<sup>13</sup>C NMR spectra of dimethyl [(2*R*,3*R*,4*S*)-1-methyl-2,4-diphenylpyrrolidin-3-yl]phosphonate (**8**)  
in DMSO-d<sub>6</sub>

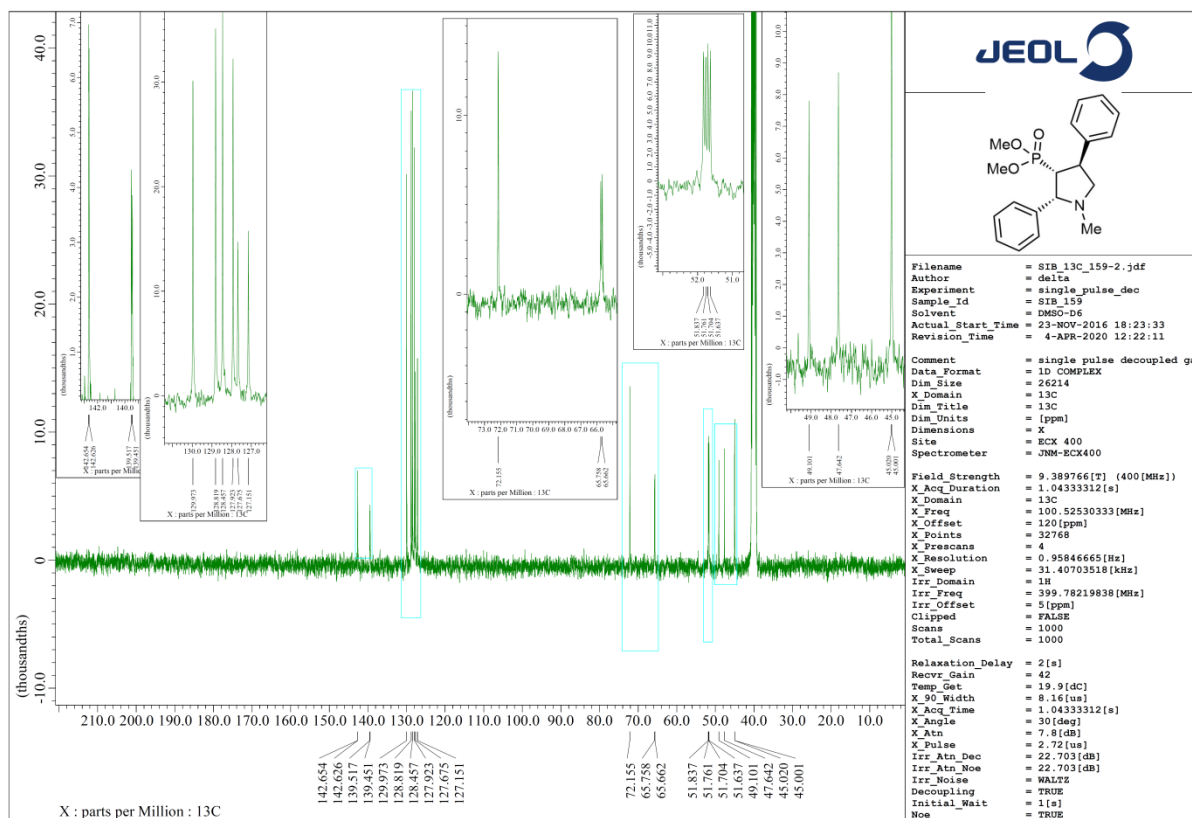

DEPT NMR spectra of dimethyl [(2*R*,3*R*,4*S*)-1-methyl-2,4-diphenylpyrrolidin-3-yl]phosphonate (**8**)

In DMSO-d<sub>6</sub>

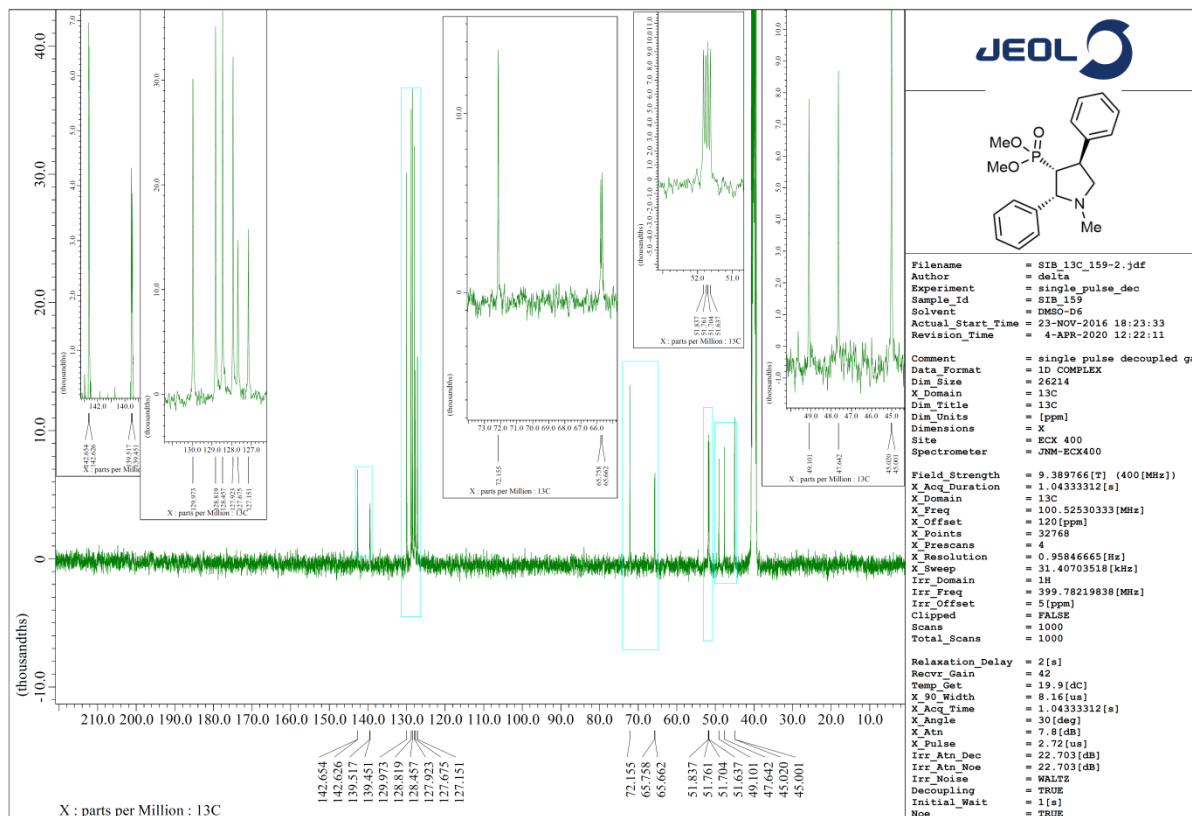



<sup>31</sup>P NMR spectra of dimethyl [(2*R*,3*R*,4*S*)-1-methyl-2,4-diphenylpyrrolidin-3-yl]phosphonate (**8**)  
in DMSO-*d*<sup>6</sup>

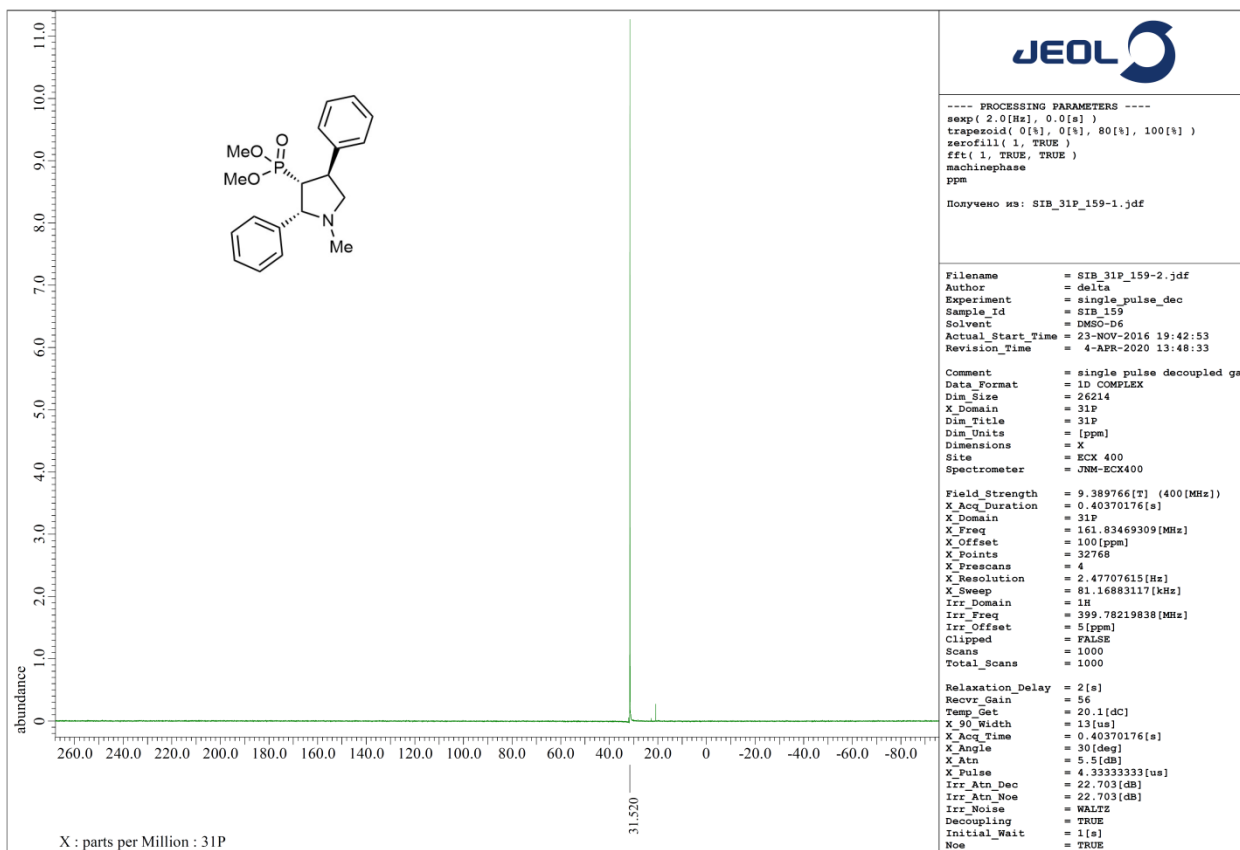

FTIR spectra of methyl hydrogen ((2*R*,3*R*,4*S*)-2,4-diphenylpyrrolidin-3-yl)phosphonate (**9**)

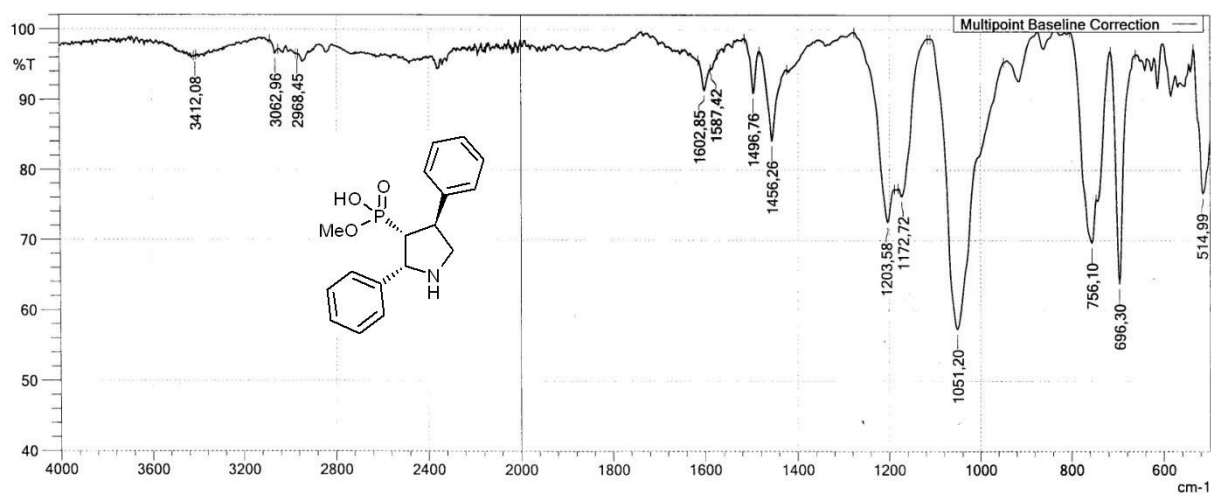



<sup>1</sup>H NMR spectra of methyl hydrogen ((2*R*,3*R*,4*S*)-2,4-diphenylpyrrolidin-3-yl)phosphonate (**9**) in D<sub>2</sub>O

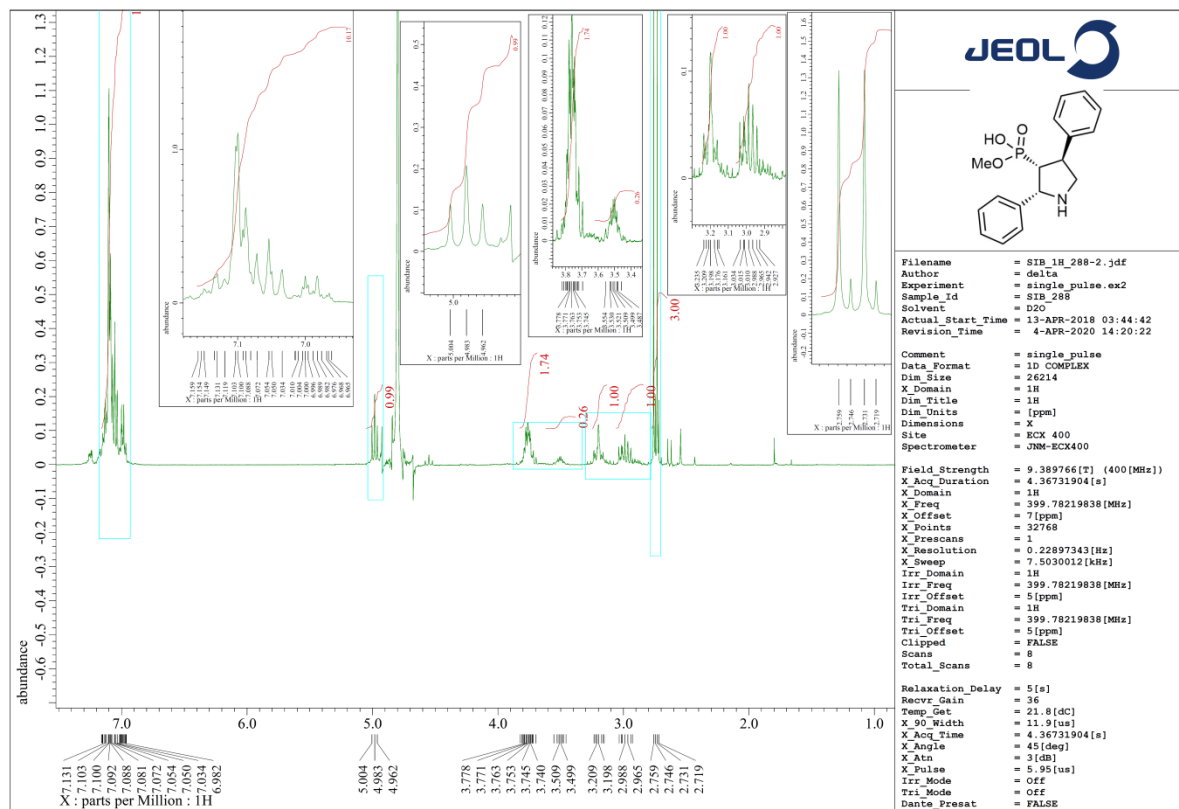

<sup>13</sup>C NMR spectra of methyl hydrogen ((2*R*,3*R*,4*S*)-2,4-diphenylpyrrolidin-3-yl)phosphonate (**9**) in D<sub>2</sub>O

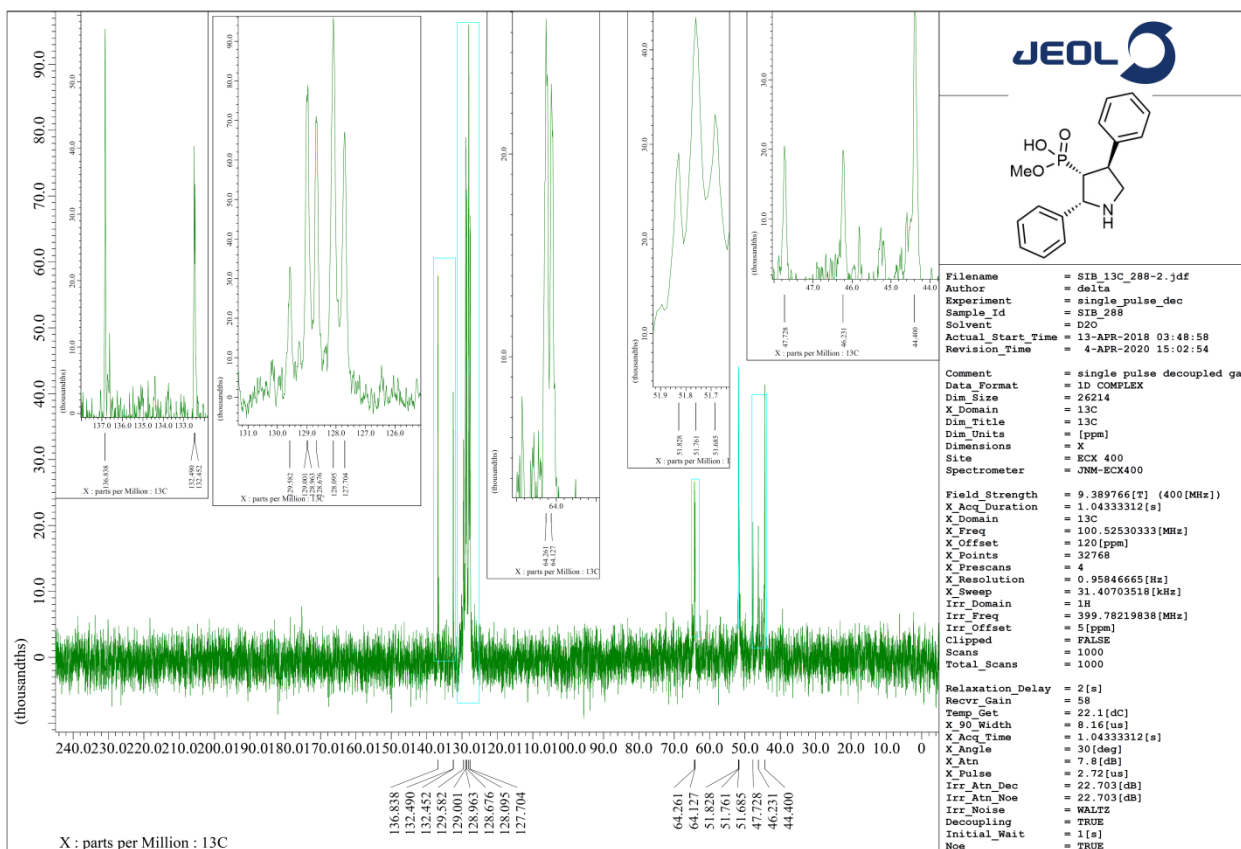



<sup>31</sup>P NMR spectra of methyl hydrogen ((2*R*,3*R*,4*S*)-2,4-diphenylpyrrolidin-3-yl)phosphonate (**9**) in D<sub>2</sub>O

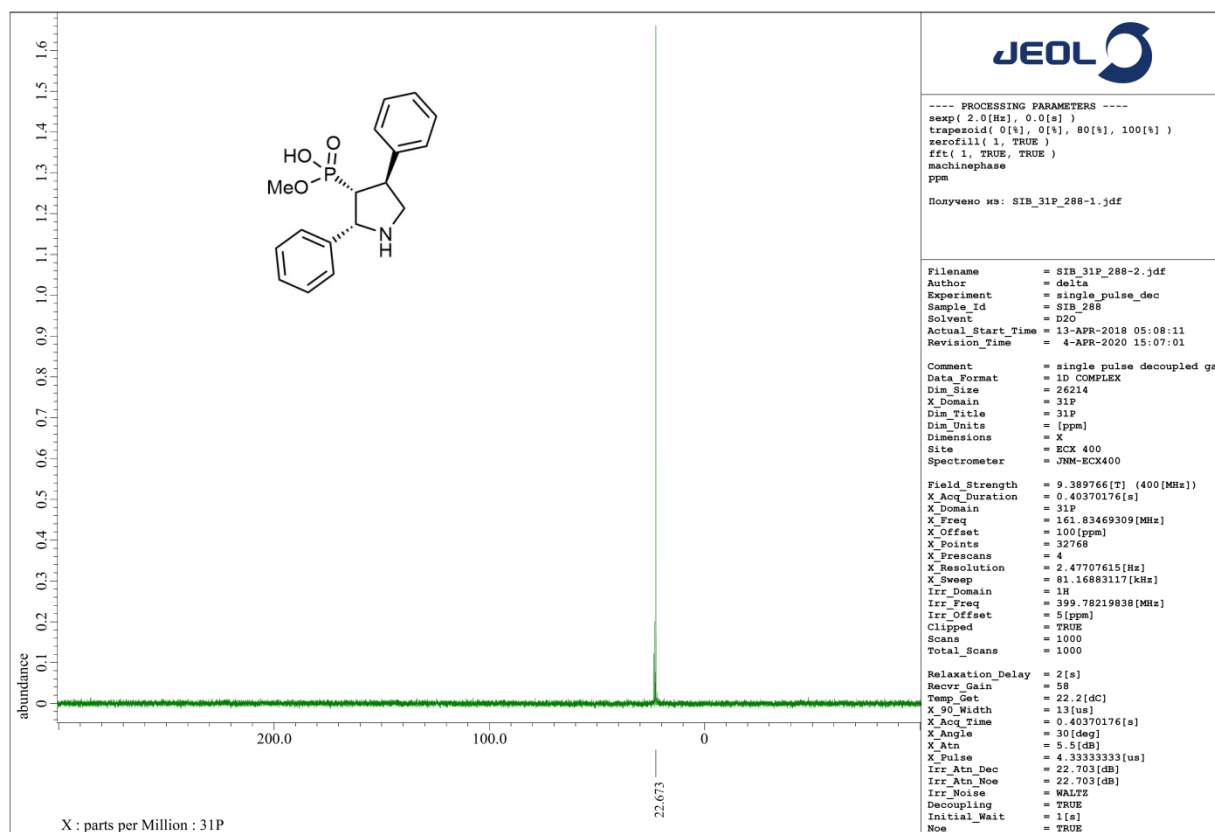

FTIR spectra of dimethyl [(2*R*,3*R*,4*S*)-1-formyl-2,4-diphenylpyrrolidin-3-yl]phosphonate (**10a**)

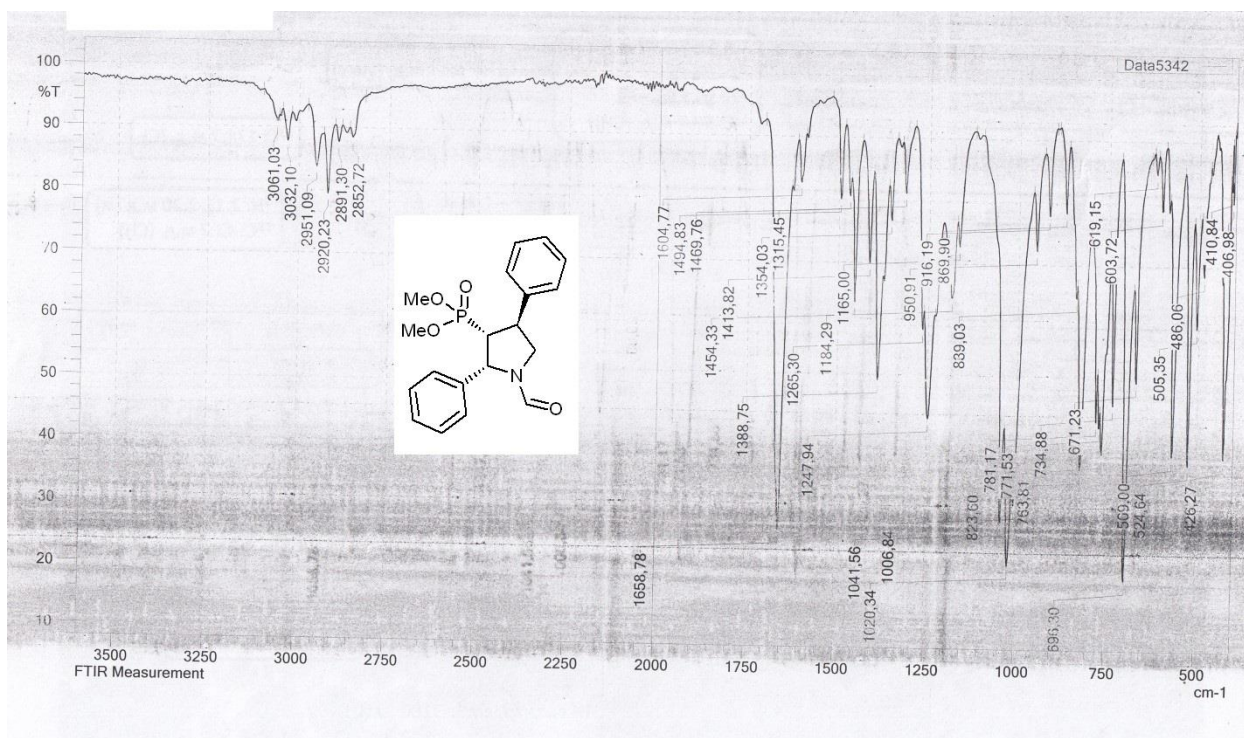



<sup>1</sup>H NMR spectra of dimethyl [(2*R*,3*R*,4*S*)-1-formyl-2,4-diphenylpyrrolidin-3-yl]phosphonate (**10a**) in CDCl<sub>3</sub>

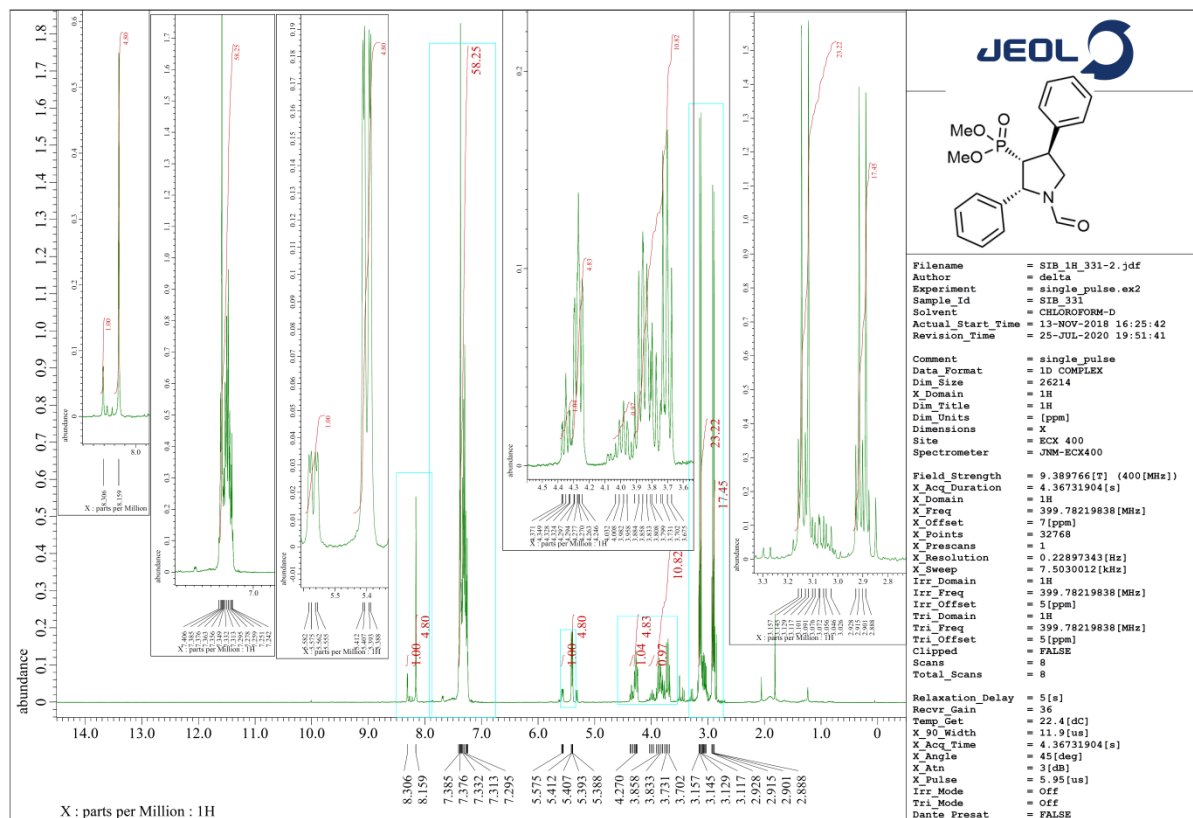

<sup>13</sup>C NMR spectra of dimethyl [(2*R*,3*R*,4*S*)-1-formyl-2,4-diphenylpyrrolidin-3-yl]phosphonate (**10a**) in CDCl<sub>3</sub>

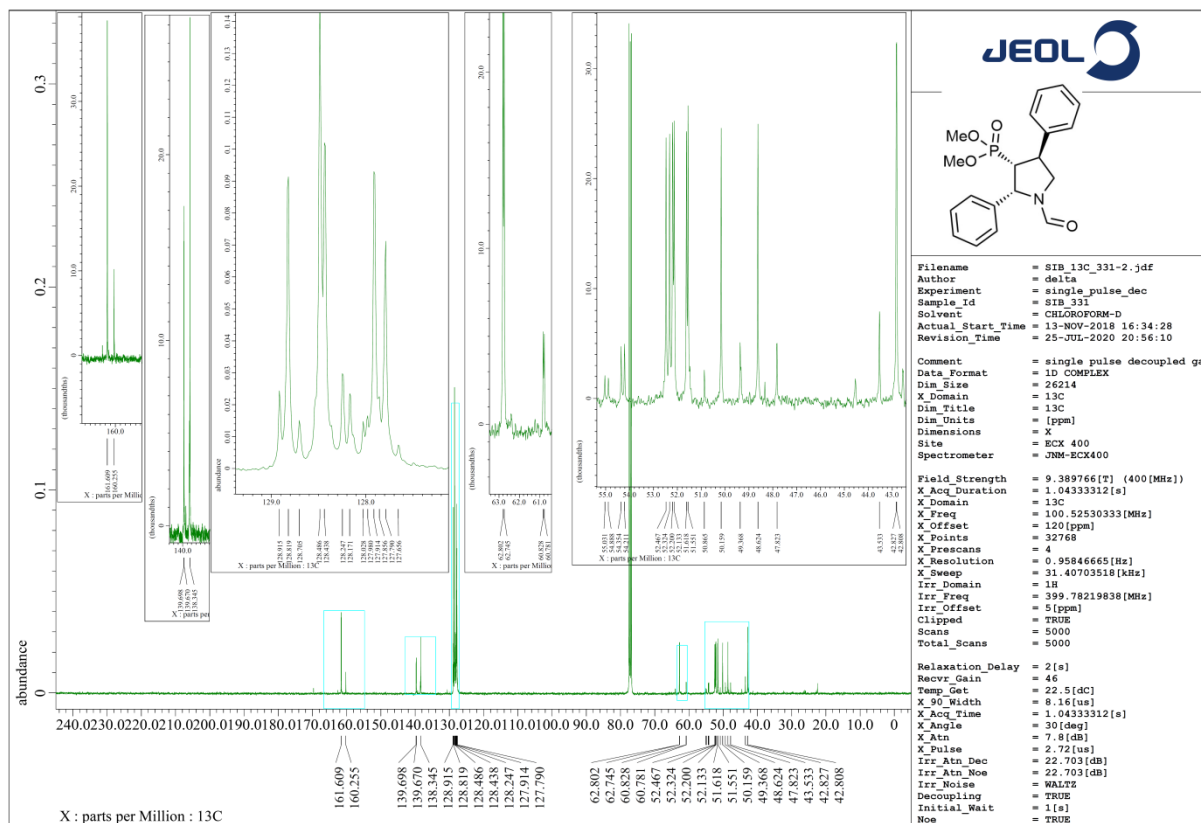



DEPT NMR spectra of dimethyl [(2*R*,3*R*,4*S*)-1-formyl-2,4-diphenylpyrrolidin-3-yl]phosphonate (**10a**) in

CDCl<sub>3</sub>

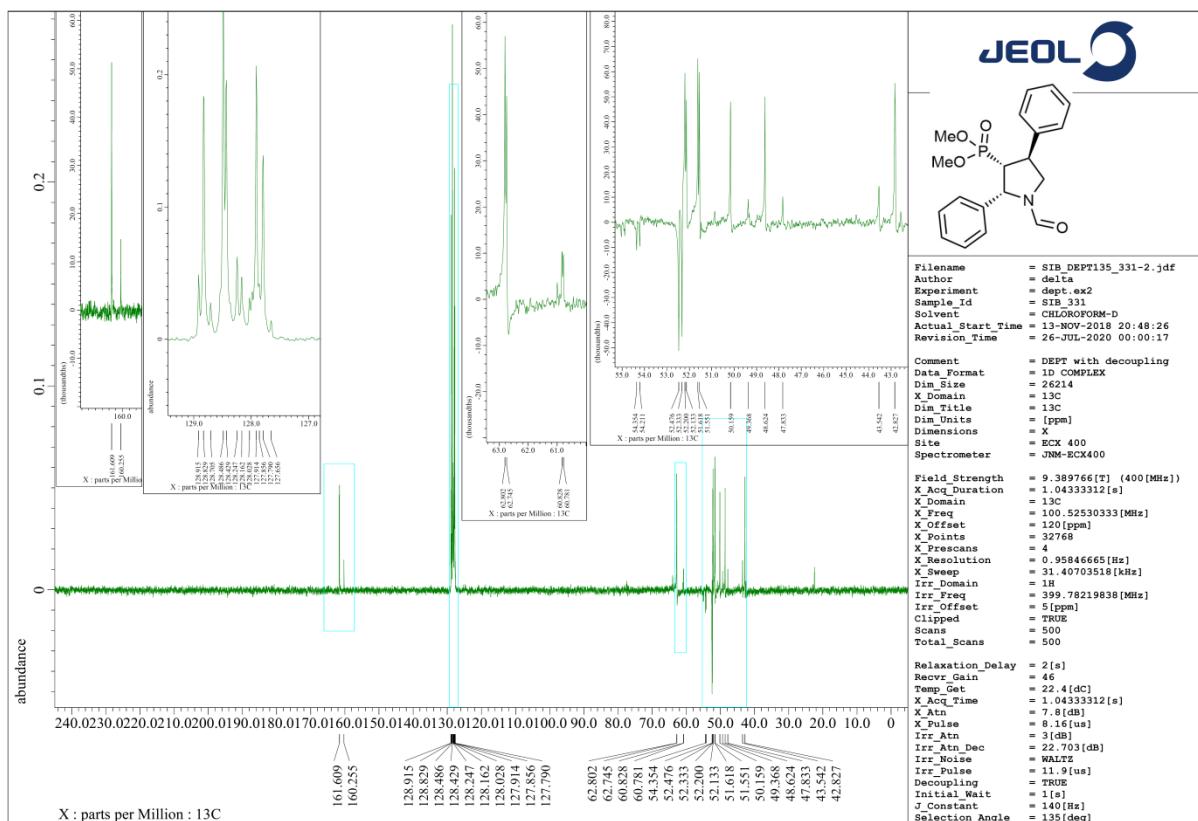

<sup>31</sup>P NMR spectra of dimethyl [(2*R*,3*R*,4*S*)-1-formyl-2,4-diphenylpyrrolidin-3-yl]phosphonate (**10a**) in CDCl<sub>3</sub>

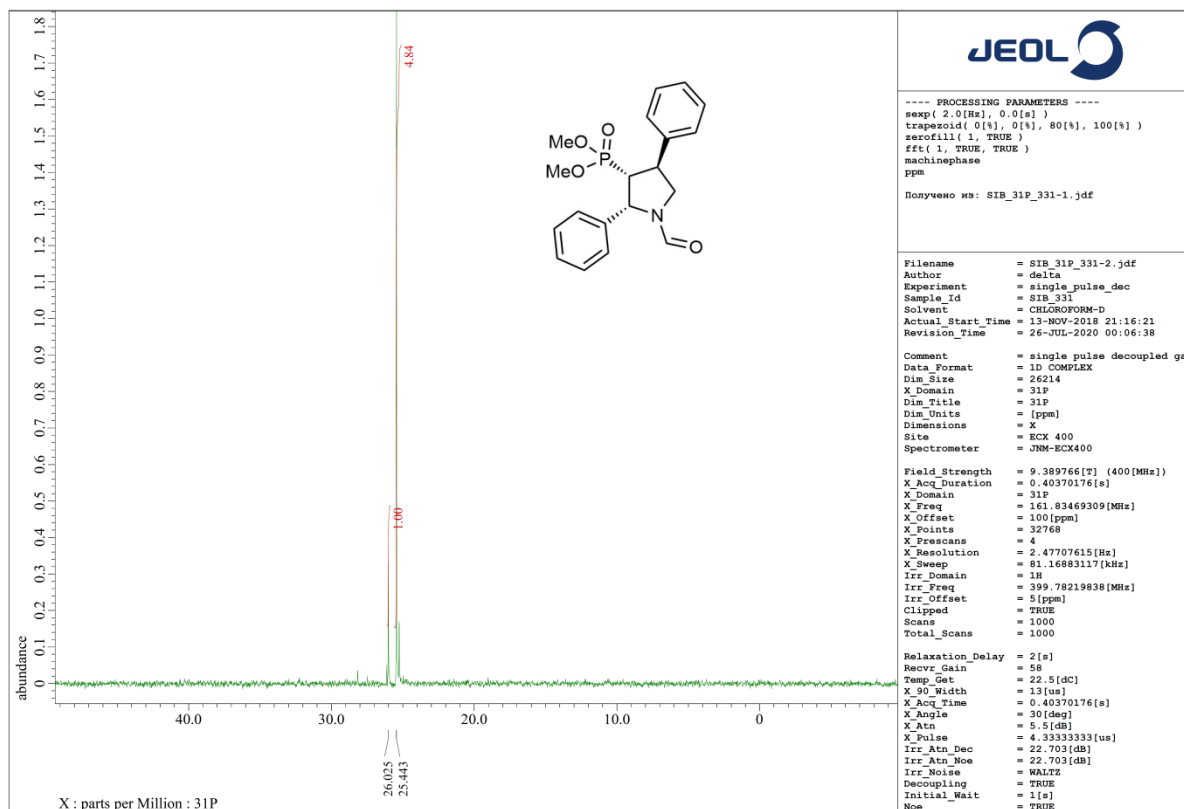



# HRMS of dimethyl [(2*R*,3*R*,4*S*)-1-formyl-2,4-diphenylpyrrolidin-3-yl]phosphonate (**10a**)

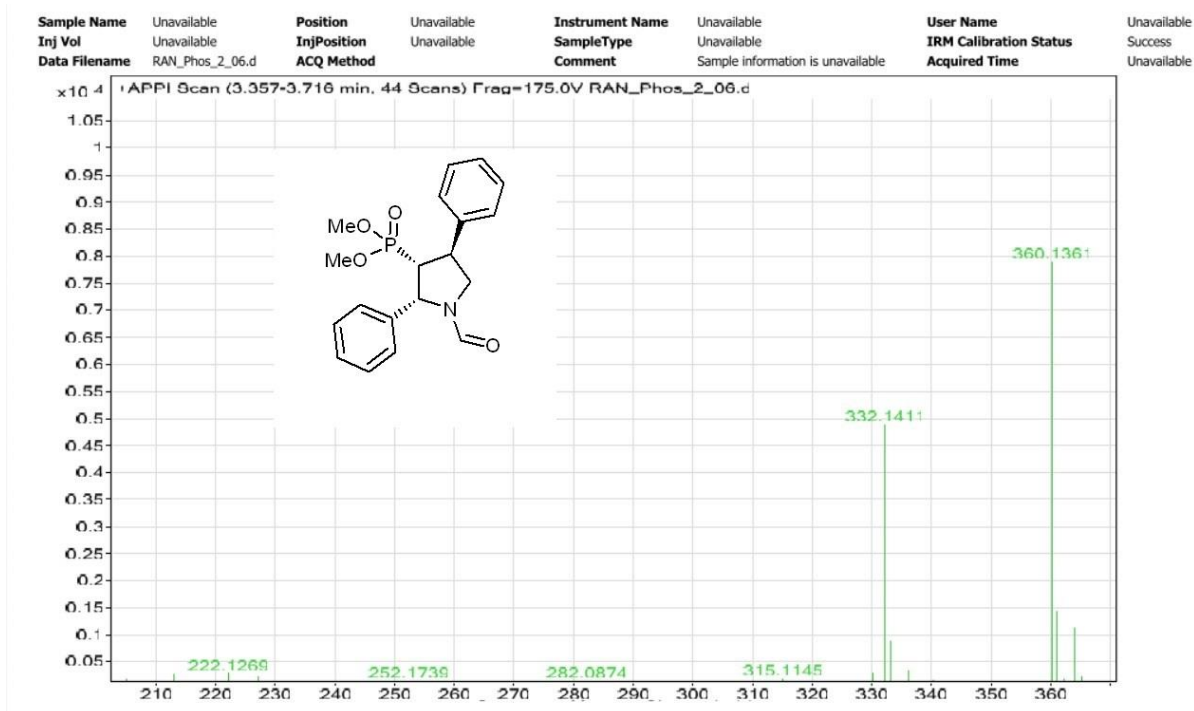

## FTIR spectra of dimethyl [(2*R*,3*R*,4*S*)-1-formyl-2-(4-methoxyphenyl)-4-phenylpyrrolidin-3-yl]-phosphonate (**10b**)

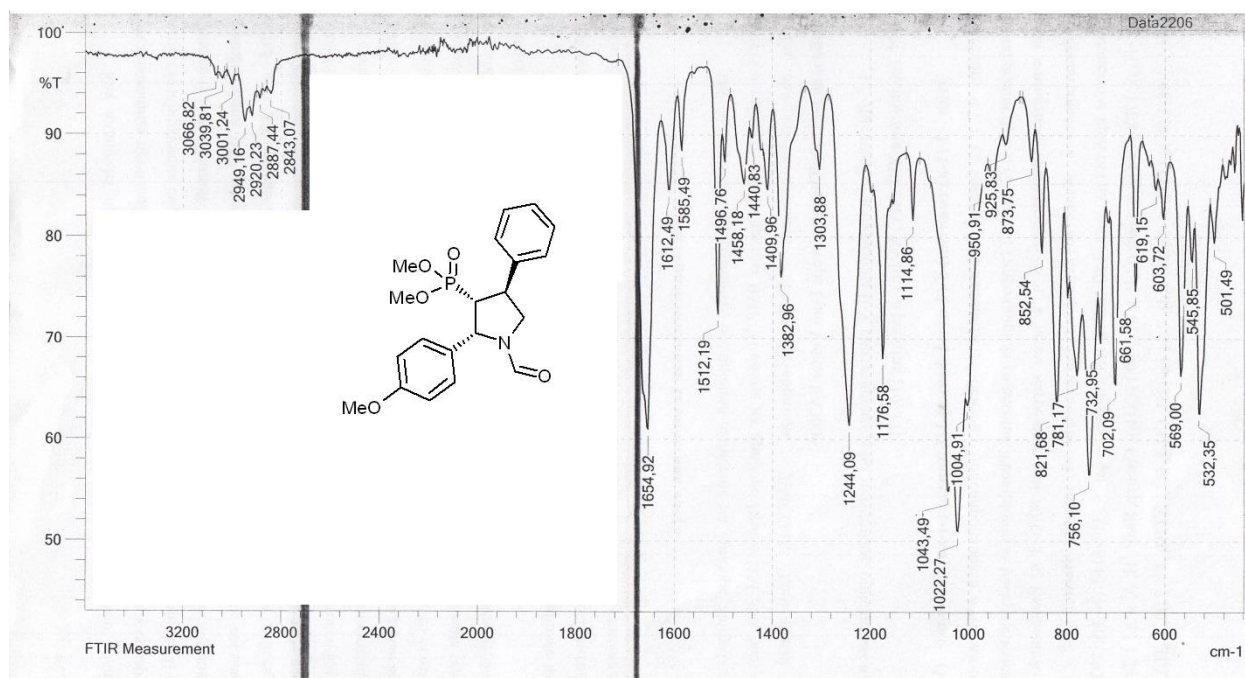



<sup>1</sup>H NMR spectra of dimethyl [(2*R*,3*R*,4*S*)-1-formyl-2-(4-methoxyphenyl)-4-phenylpyrrolidin-3-yl]-phosphonate (**10b**) in CDCl<sub>3</sub>

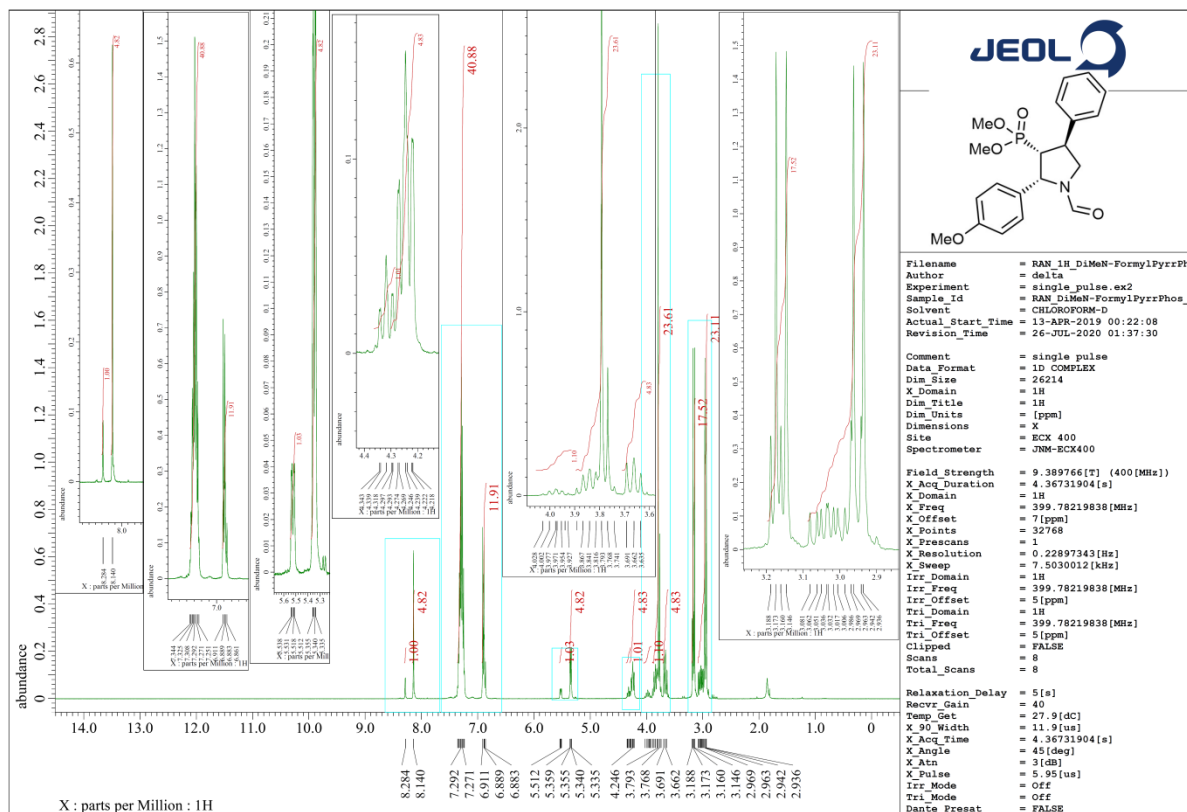

<sup>13</sup>C NMR spectra of dimethyl [(2*R*,3*R*,4*S*)-1-formyl-2-(4-methoxyphenyl)-4-phenylpyrrolidin-3-yl]-phosphonate (**10b**) in CDCl<sub>3</sub>

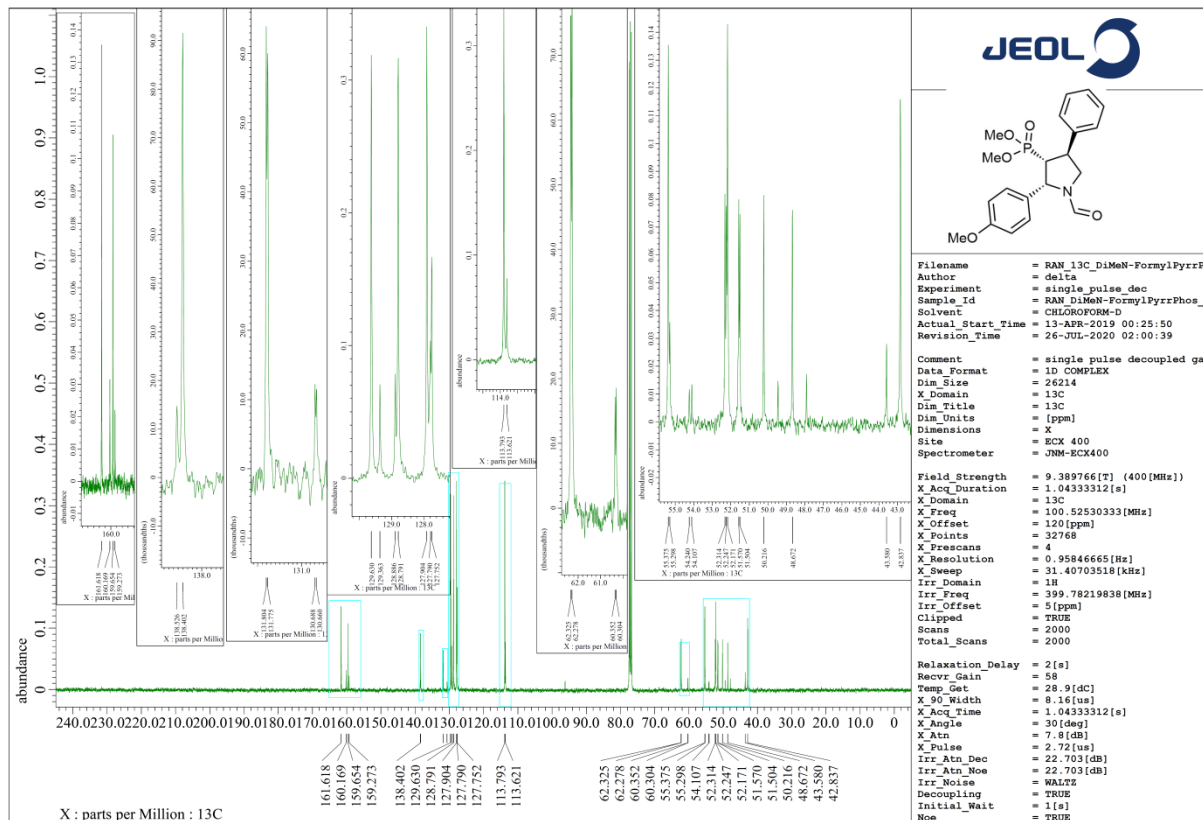



DEPT NMR spectra of dimethyl [(2*R*,3*R*,4*S*)-1-formyl-2-(4-methoxyphenyl)-4-phenylpyrrolidin-3-yl]-  
phosphonate (**10b**) in CDCl<sub>3</sub>

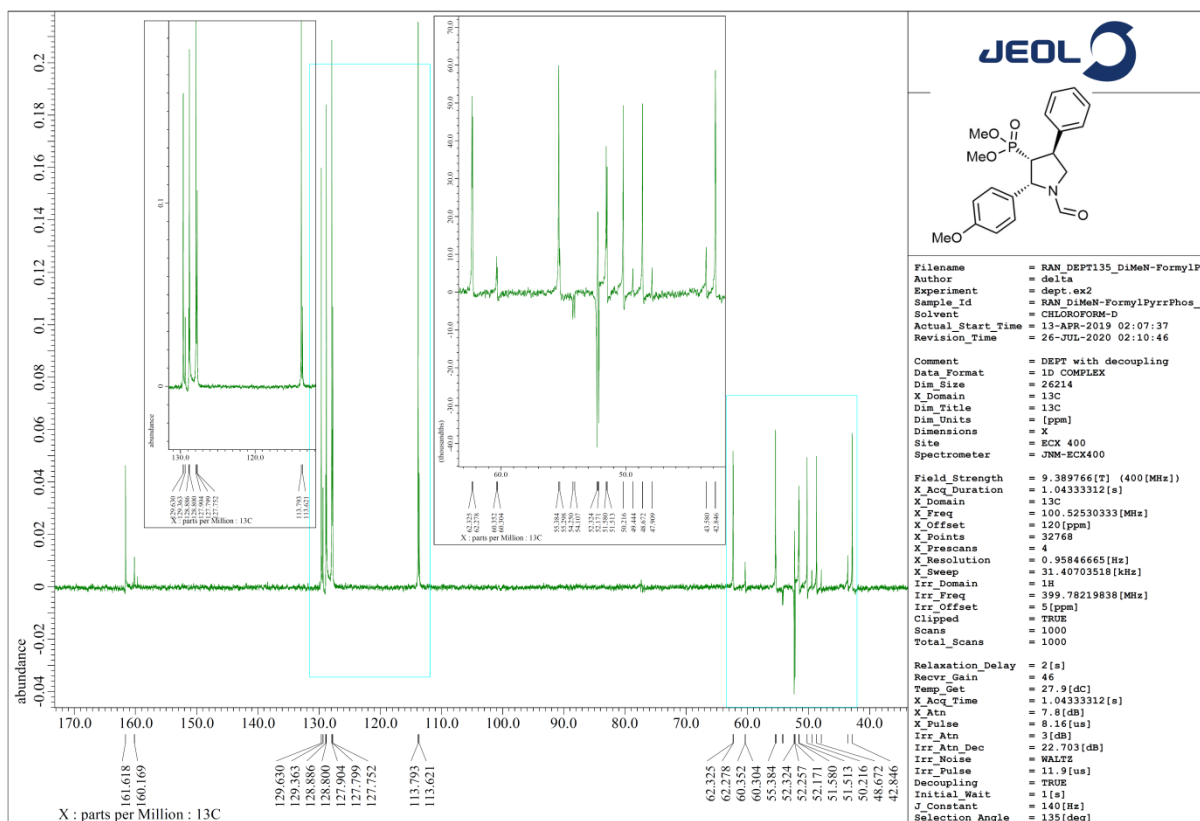

<sup>31</sup>P NMR spectra of dimethyl [(2*R*,3*R*,4*S*)-1-formyl-2-(4-methoxyphenyl)-4-phenylpyrrolidin-3-yl]-  
phosphonate (**10b**) in CDCl<sub>3</sub>

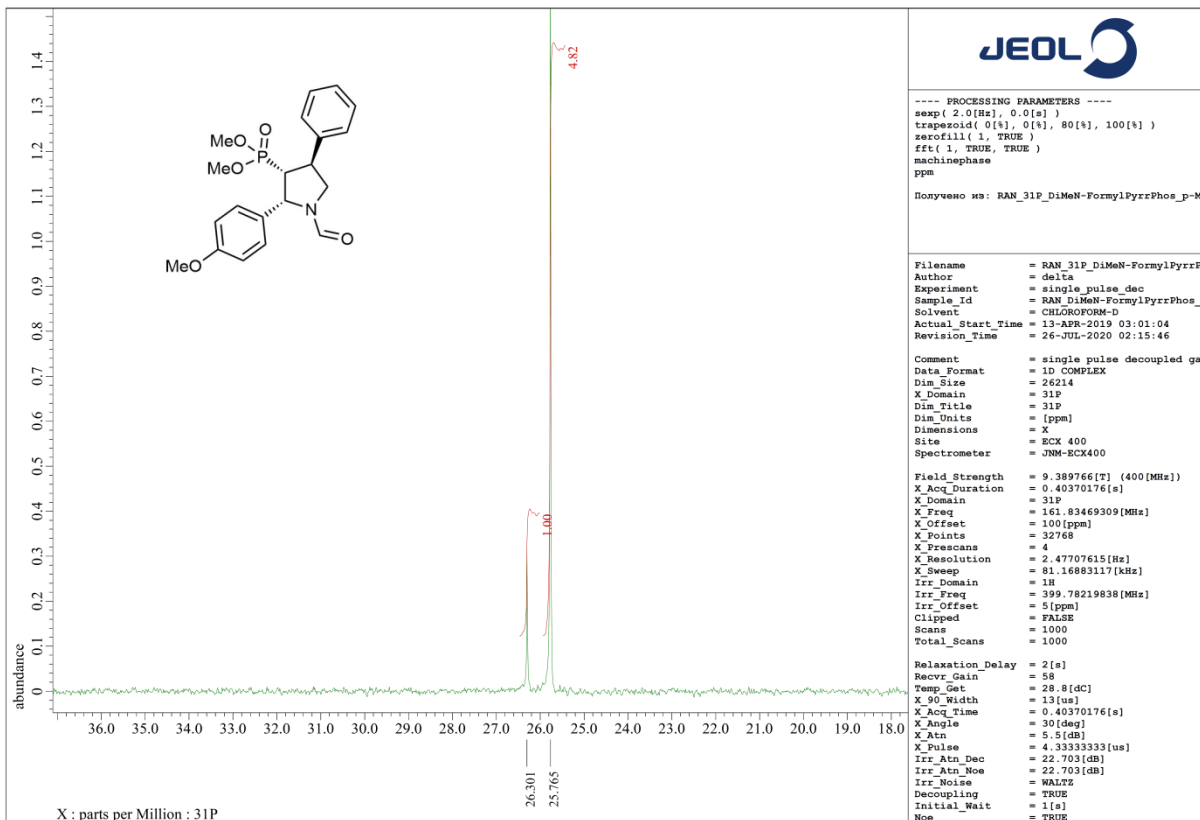



HRMS of dimethyl [(2*R*,3*R*,4*S*)-1-formyl-2-(4-methoxyphenyl)-4-phenylpyrrolidin-3-yl]-phosphonate (**10b**)

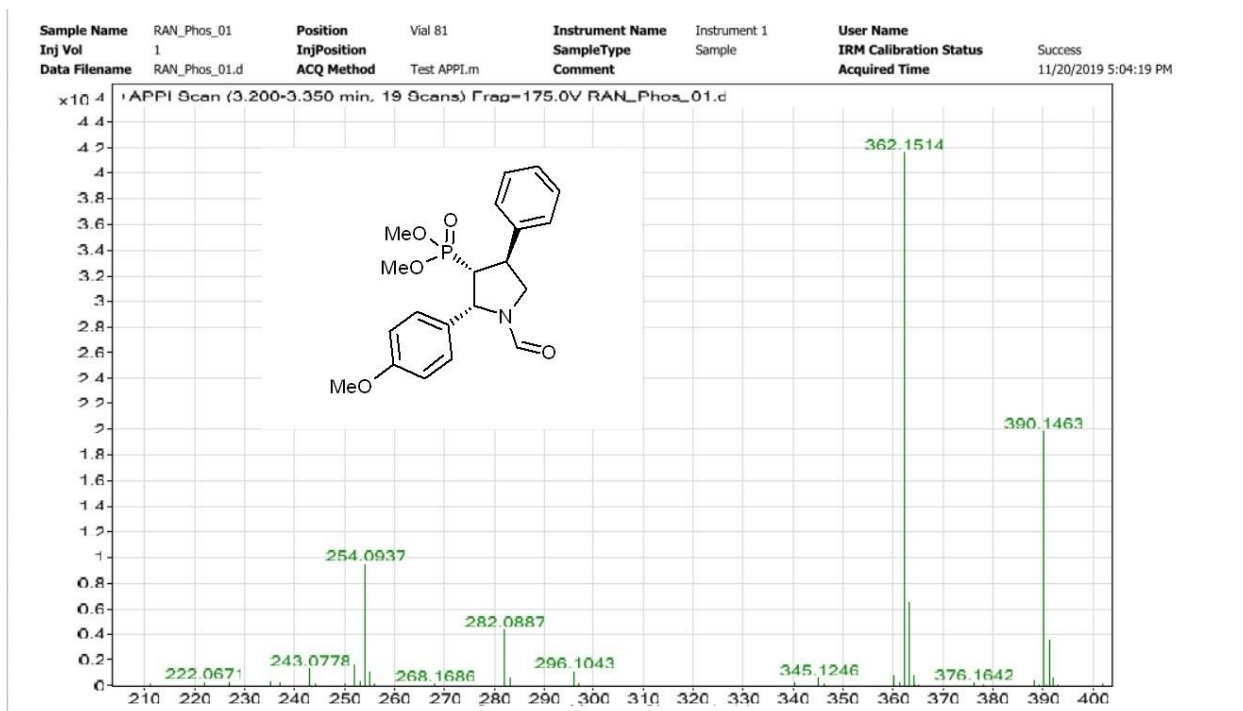

FTIR spectra of dimethyl [(2*R*,3*R*,4*S*)-1-formyl-2-(3-methoxyphenyl)-4-phenylpyrrolidin-3-yl]-phosphonate (**10c**)

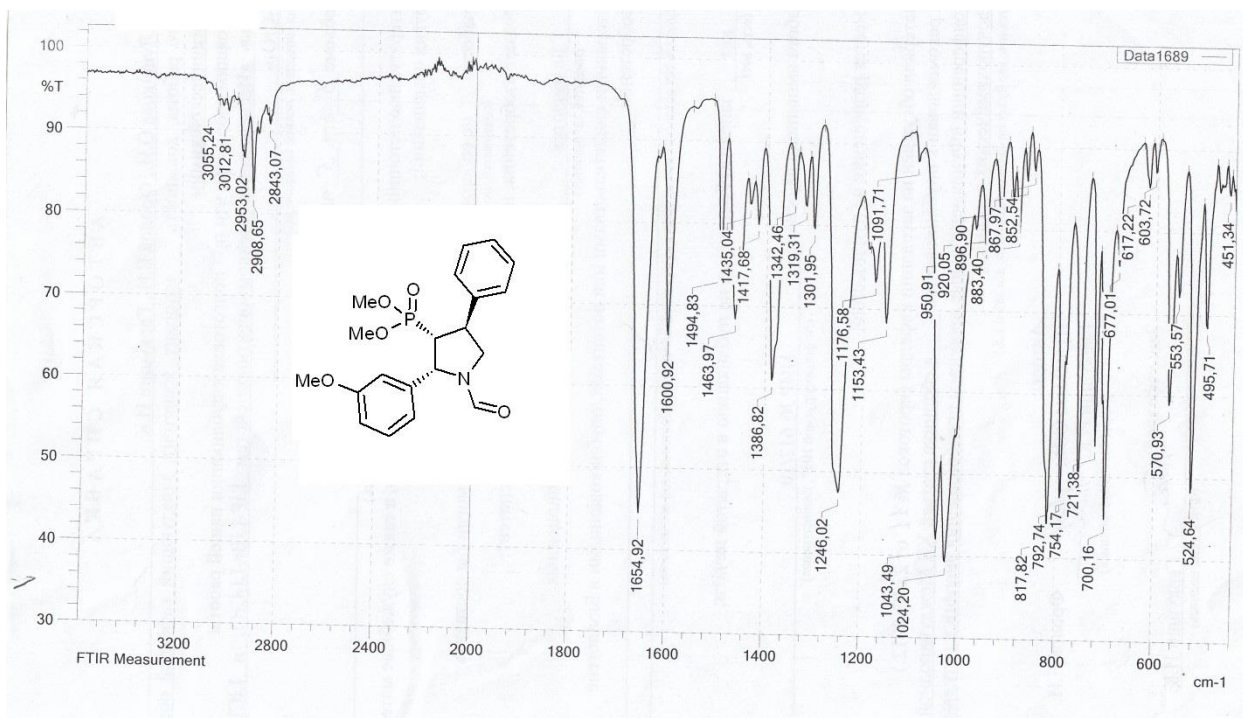



<sup>1</sup>H NMR spectra of dimethyl [(2*R*,3*R*,4*S*)-1-formyl-2-(3-methoxyphenyl)-4-phenylpyrrolidin-3-yl]-phosphonate (**10c**) in CDCl<sub>3</sub>

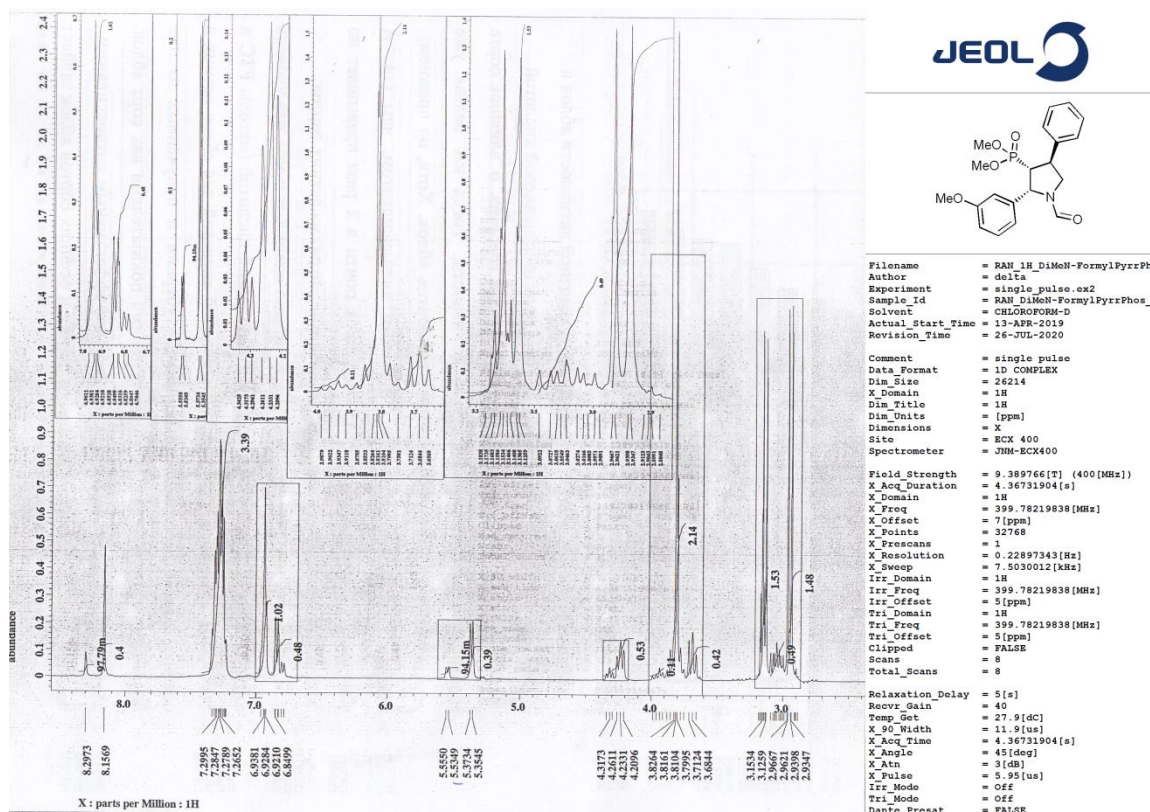

<sup>13</sup>C NMR spectra of dimethyl [(2*R*,3*R*,4*S*)-1-formyl-2-(3-methoxyphenyl)-4-phenylpyrrolidin-3-yl]-phosphonate (**10c**) in CDCl<sub>3</sub>

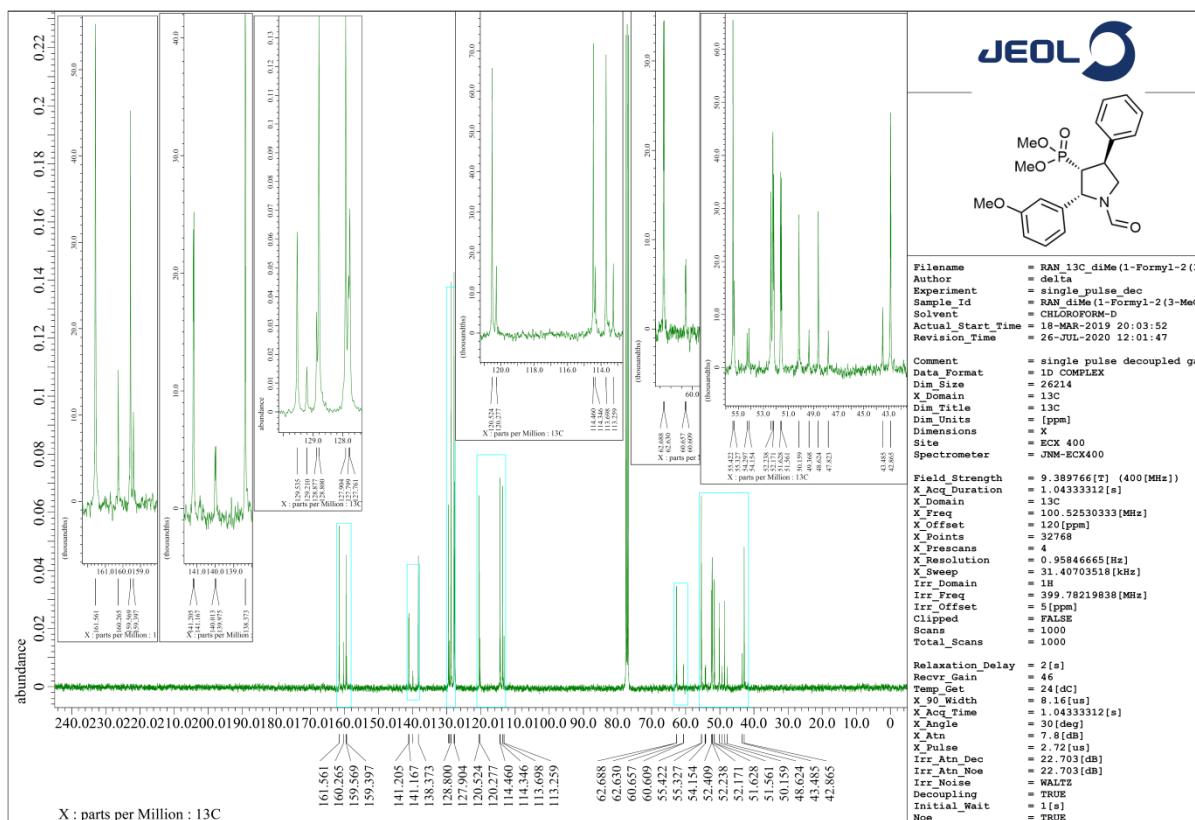



DEPT NMR spectra of dimethyl [(2*R*,3*R*,4*S*)-1-formyl-2-(3-methoxyphenyl)-4-phenylpyrrolidin-3-yl]-phosphonate (**10c**) in CDCl<sub>3</sub>

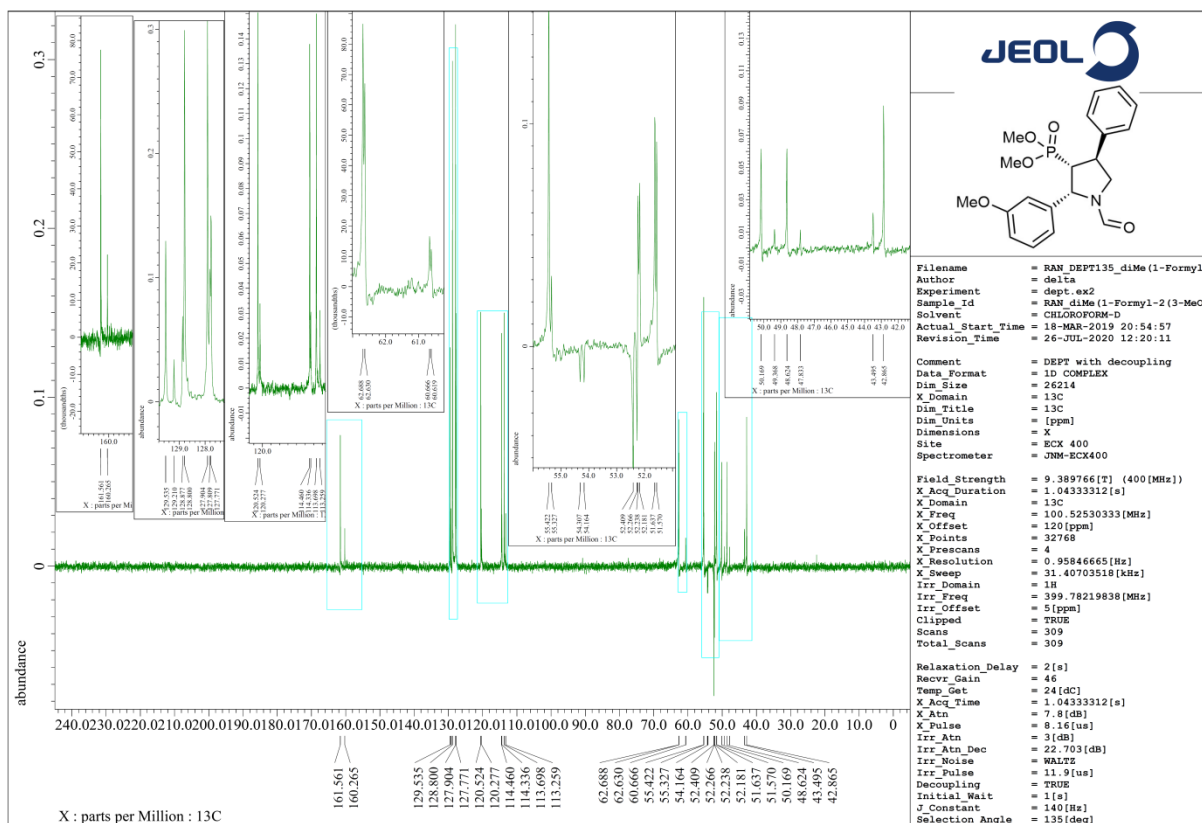

<sup>31</sup>P NMR spectra of dimethyl [(2*R*,3*R*,4*S*)-1-formyl-2-(3-methoxyphenyl)-4-phenylpyrrolidin-3-yl]-phosphonate (**10c**) in CDCl<sub>3</sub>

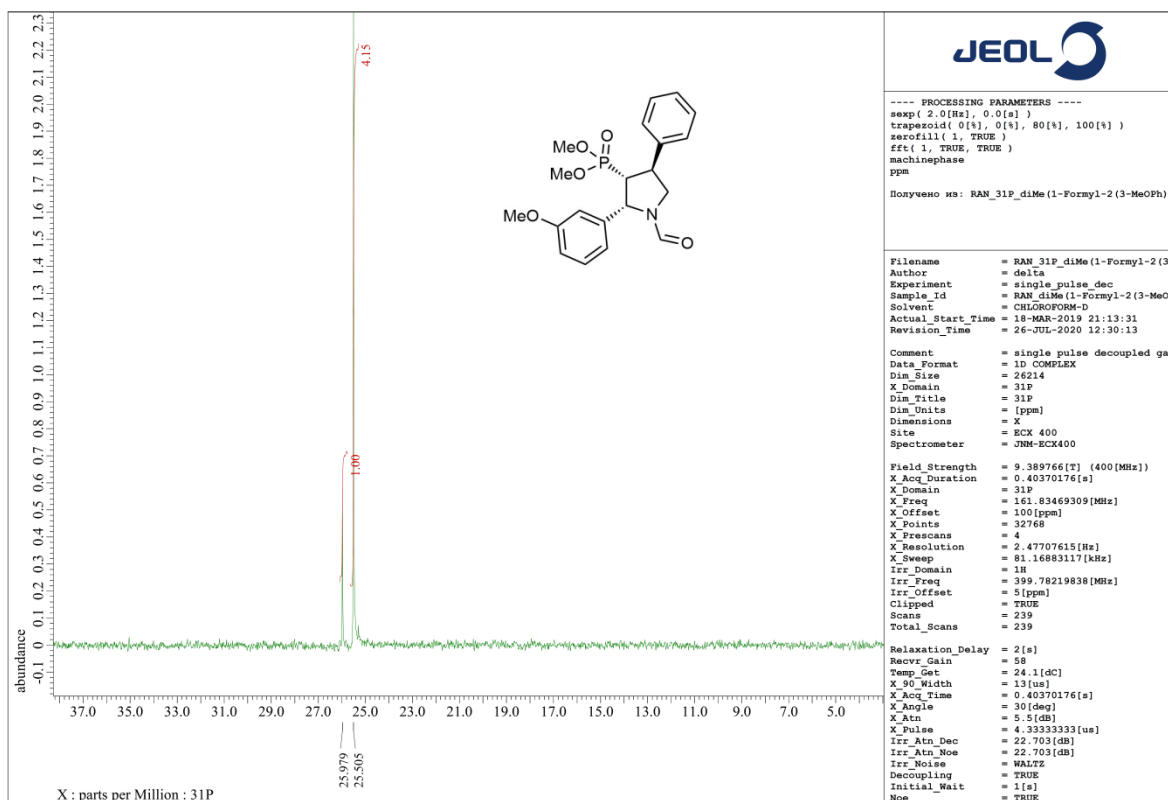



HRMS of dimethyl [(2*R*,3*R*,4*S*)-1-formyl-2-(3-methoxyphenyl)-4-phenylpyrrolidin-3-yl]-phosphonate (**10c**)

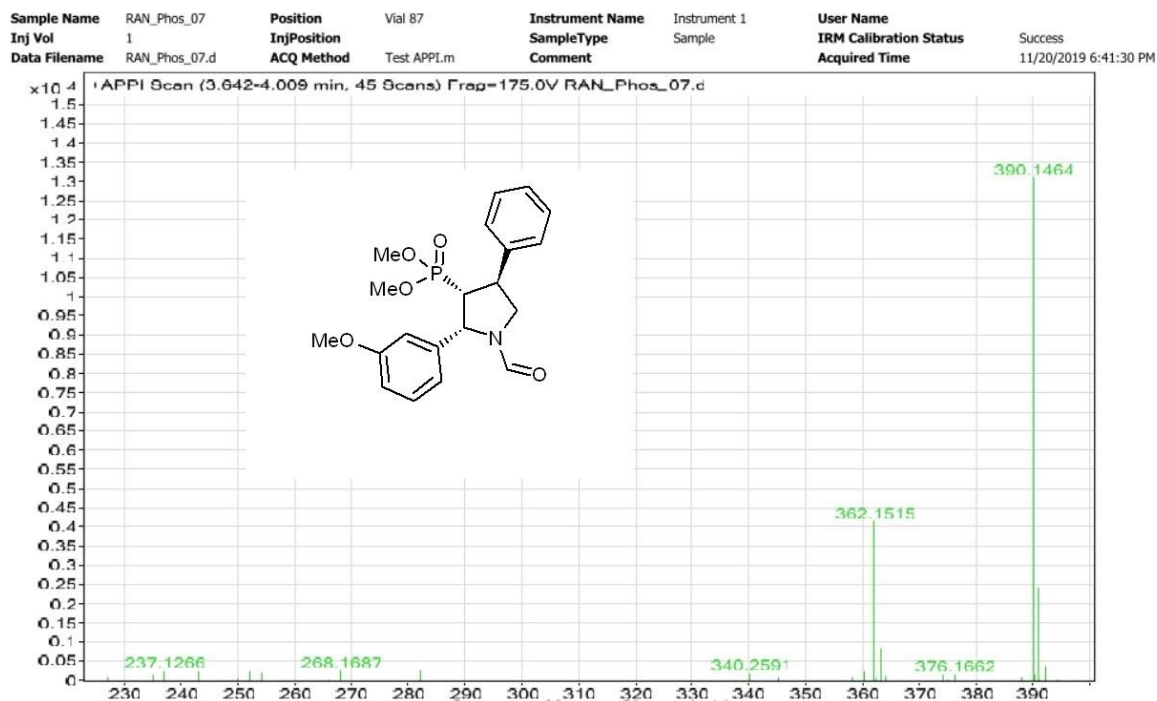

FTIR spectra of dimethyl [(2*R*,3*R*,4*S*)-1-formyl-2-methyl-4-phenylpyrrolidin-3-yl]phosphonate (**10d**)

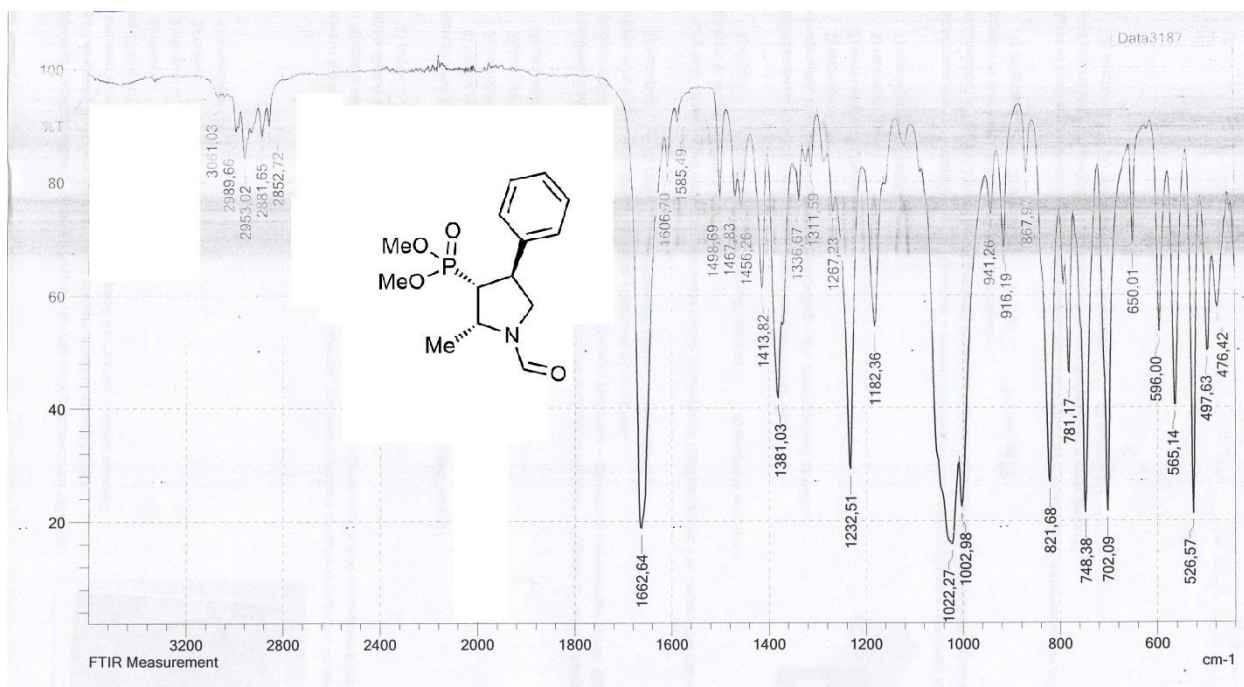



<sup>1</sup>H NMR spectra of dimethyl [(2*R*,3*R*,4*S*)-1-formyl-2-methyl-4-phenylpyrrolidin-3-yl]phosphonate (**10d**) in

CDCl<sub>3</sub>

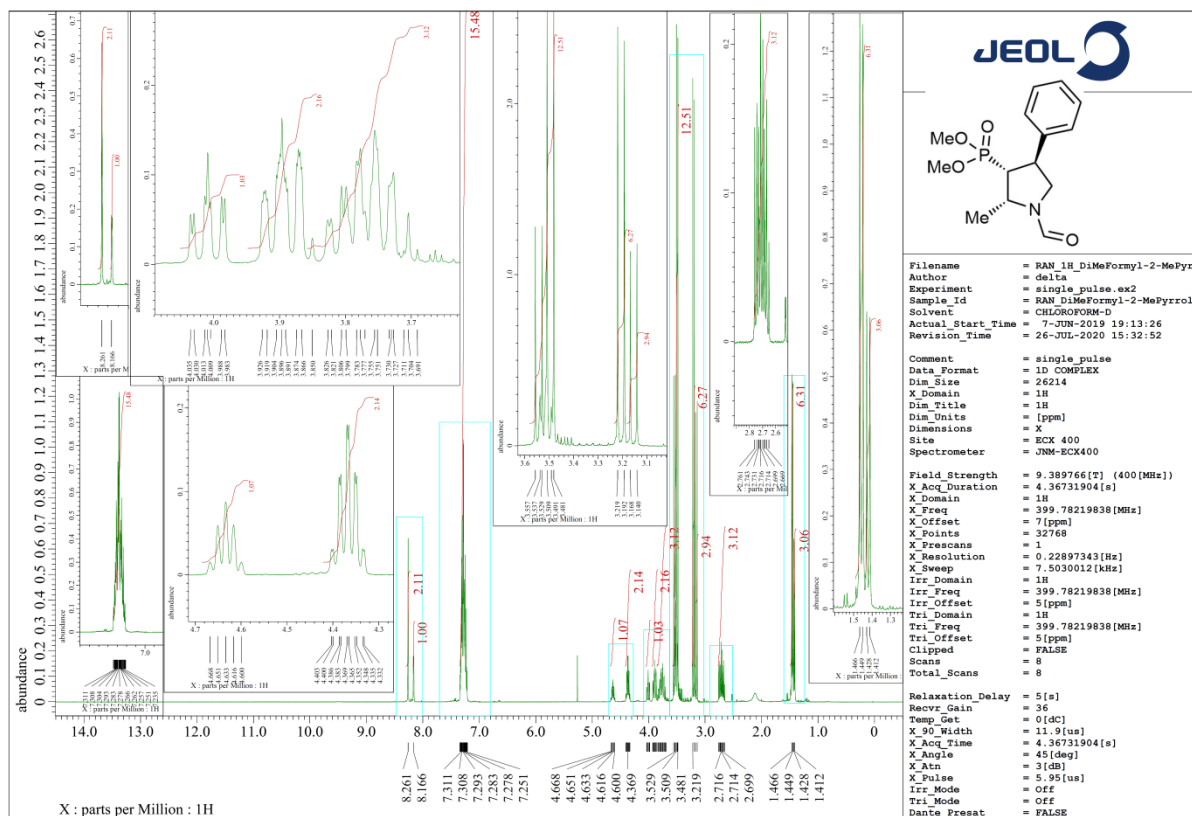

<sup>13</sup>C NMR spectra of dimethyl [(2*R*,3*R*,4*S*)-1-formyl-2-methyl-4-phenylpyrrolidin-3-yl]phosphonate (**10d**) in

CDCl<sub>3</sub>

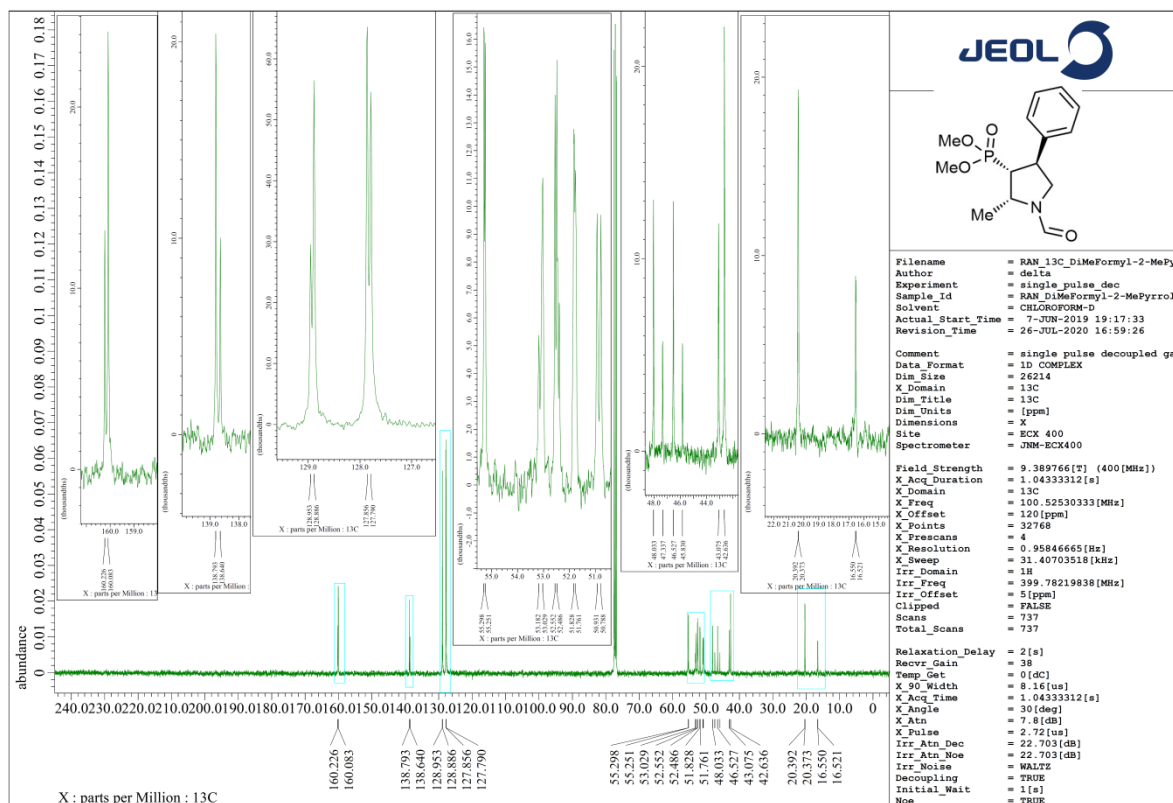



DEPT NMR spectra of dimethyl [(2*R*,3*R*,4*S*)-1-formyl-2-methyl-4-phenylpyrrolidin-3-yl]phosphonate (**10d**)

in CDCl<sub>3</sub>

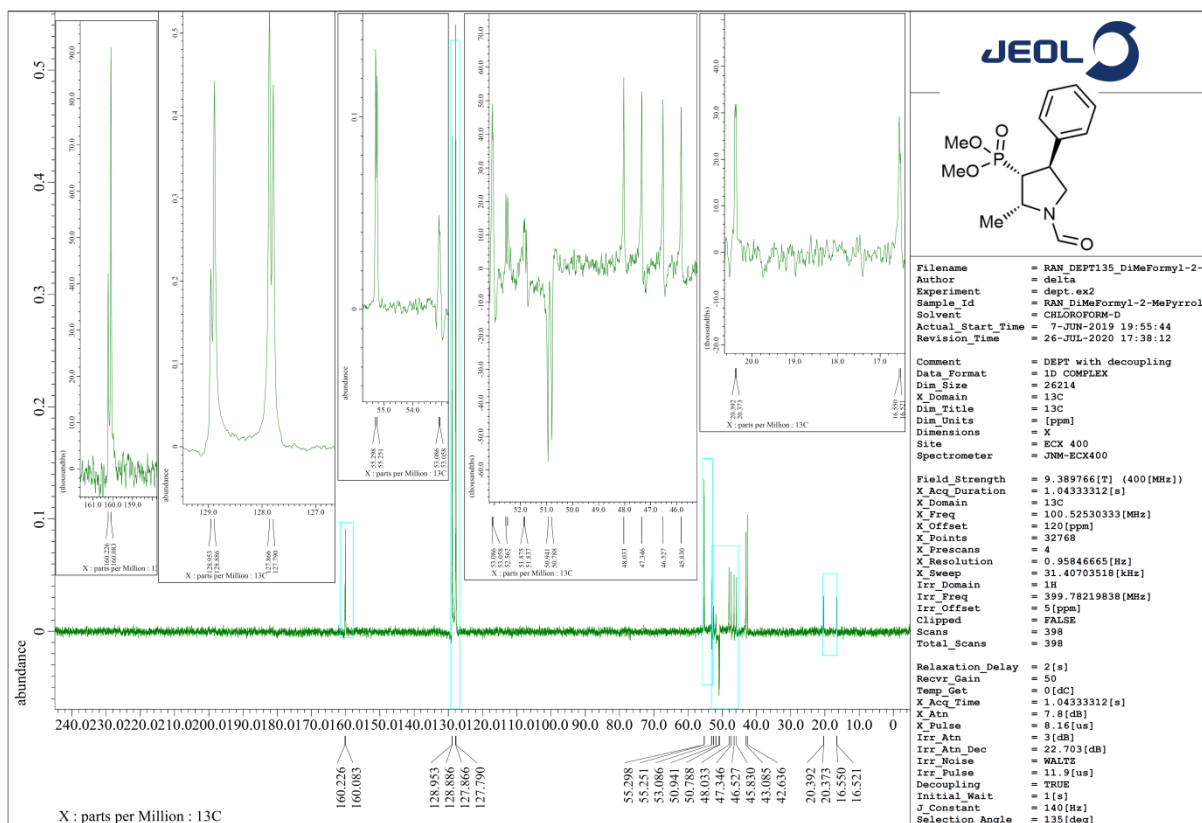

<sup>31</sup>P NMR spectra of dimethyl [(2*R*,3*R*,4*S*)-1-formyl-2-methyl-4-phenylpyrrolidin-3-yl]phosphonate (**10d**) in

CDCl<sub>3</sub>

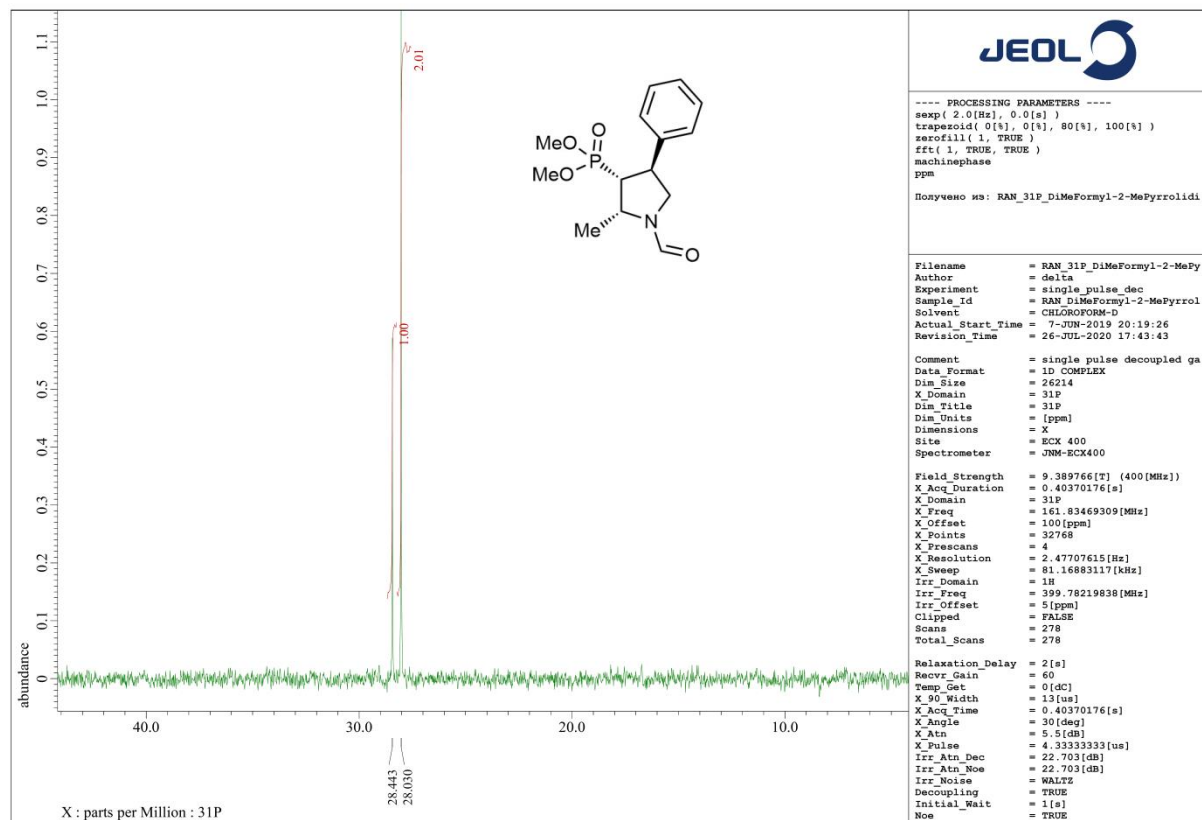



HRMS of dimethyl [(2*R*,3*R*,4*S*)-1-formyl-2-methyl-4-phenylpyrrolidin-3-yl]phosphonate (**10d**)

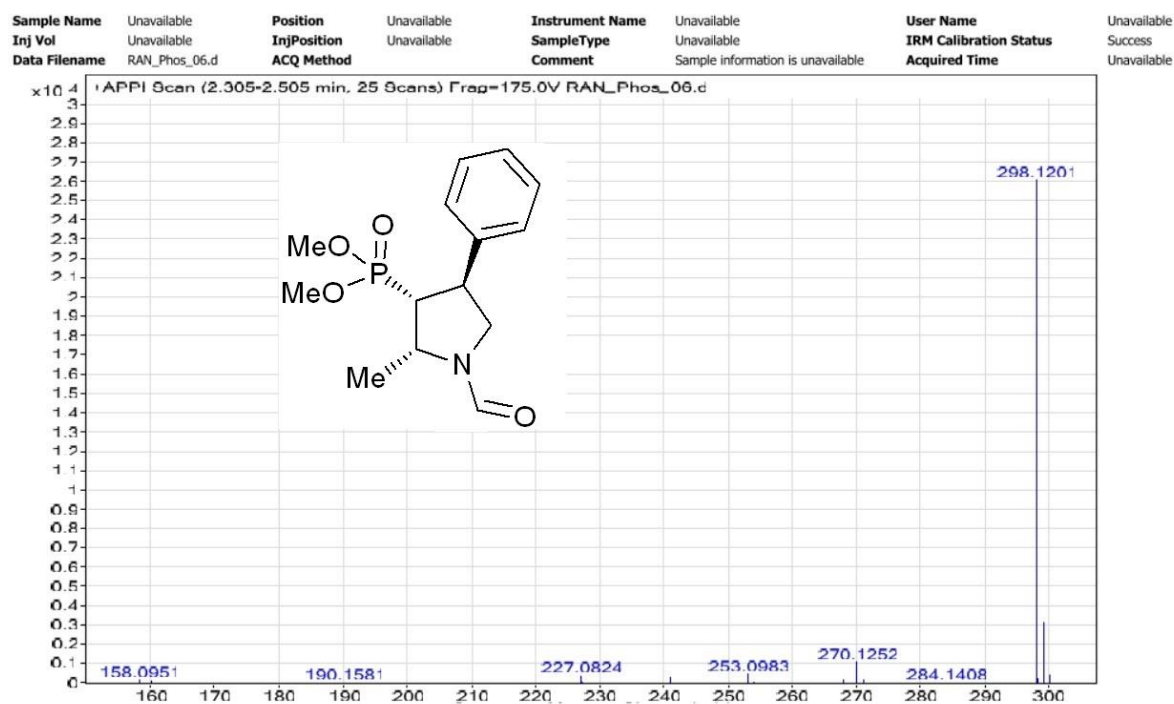

FTIR spectra of (2*R*,3*R*,4*S*)-2,4-Diphenylpyrrolidin-3-ylphosphonic acid hydrochloride (**11a**)

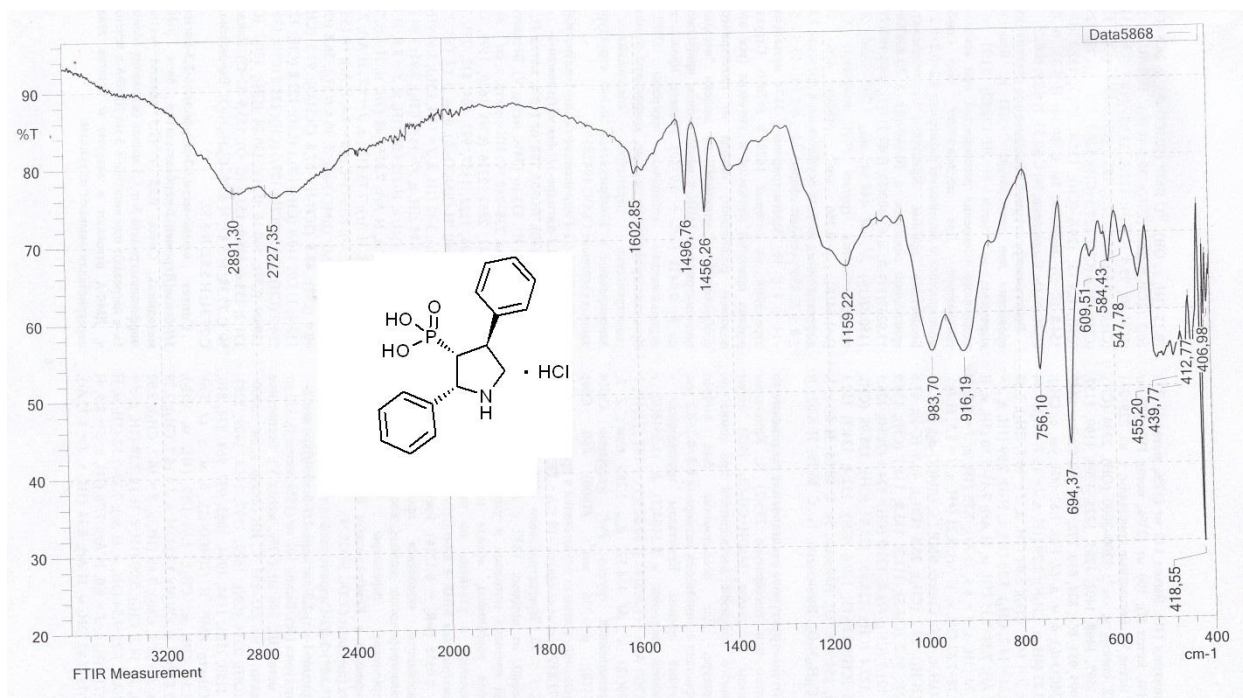



<sup>1</sup>H NMR spectra of (2*R*,3*R*,4*S*)-2,4-Diphenylpyrrolidin-3-ylphosphonic acid hydrochloride (**11a**) in D<sub>2</sub>O

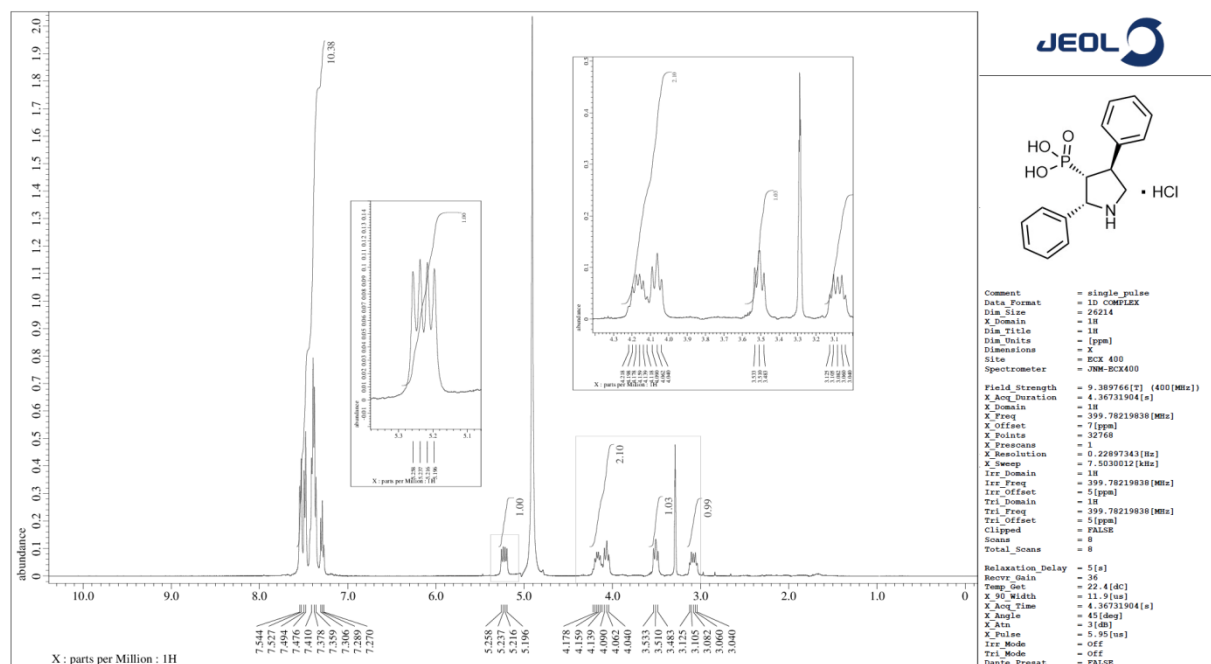

<sup>13</sup>C NMR spectra of (2*R*,3*R*,4*S*)-2,4-Diphenylpyrrolidin-3-ylphosphonic acid hydrochloride (**11a**) in D<sub>2</sub>O

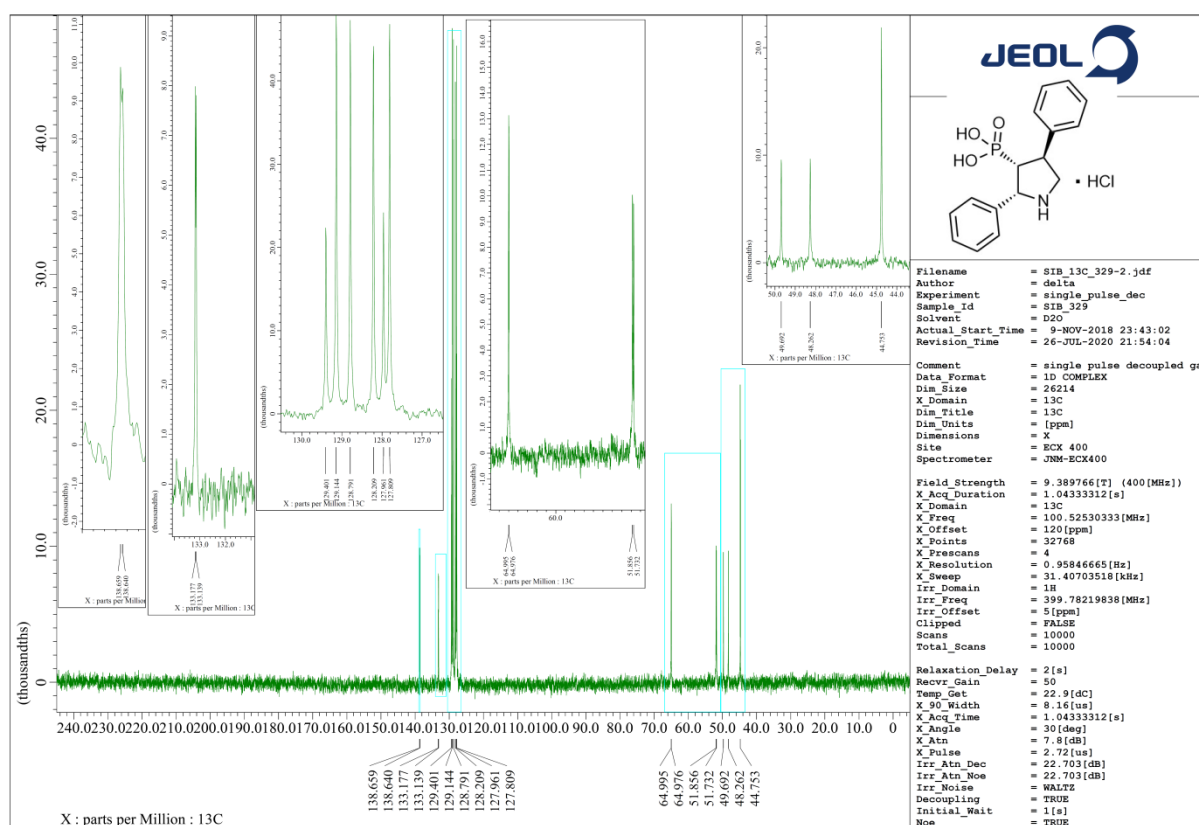



DEPT NMR spectra of (2R,3R,4S)-2,4-Diphenylpyrrolidin-3-ylphosphonic acid hydrochloride (**11a**) in D<sub>2</sub>O

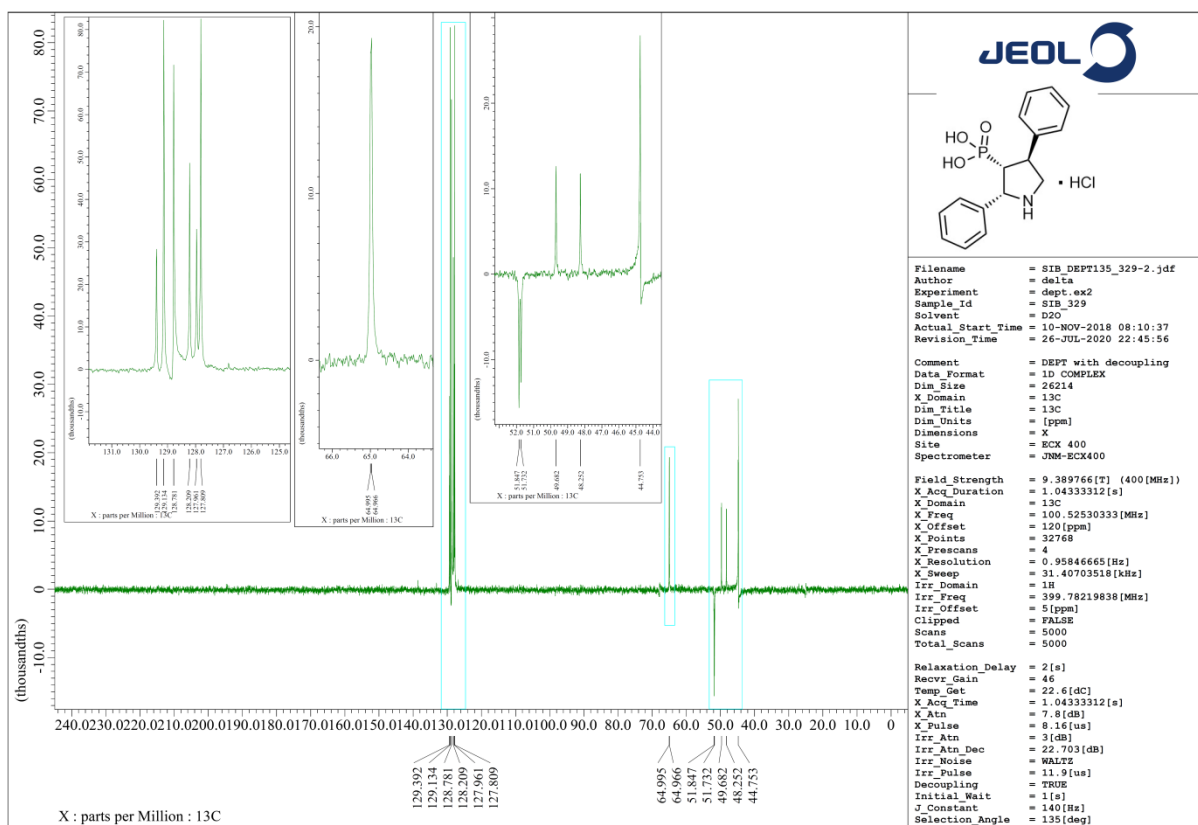

HMQC NMR spectra of (2R,3R,4S)-2,4-Diphenylpyrrolidin-3-ylphosphonic acid hydrochloride (**11a**) in D<sub>2</sub>O

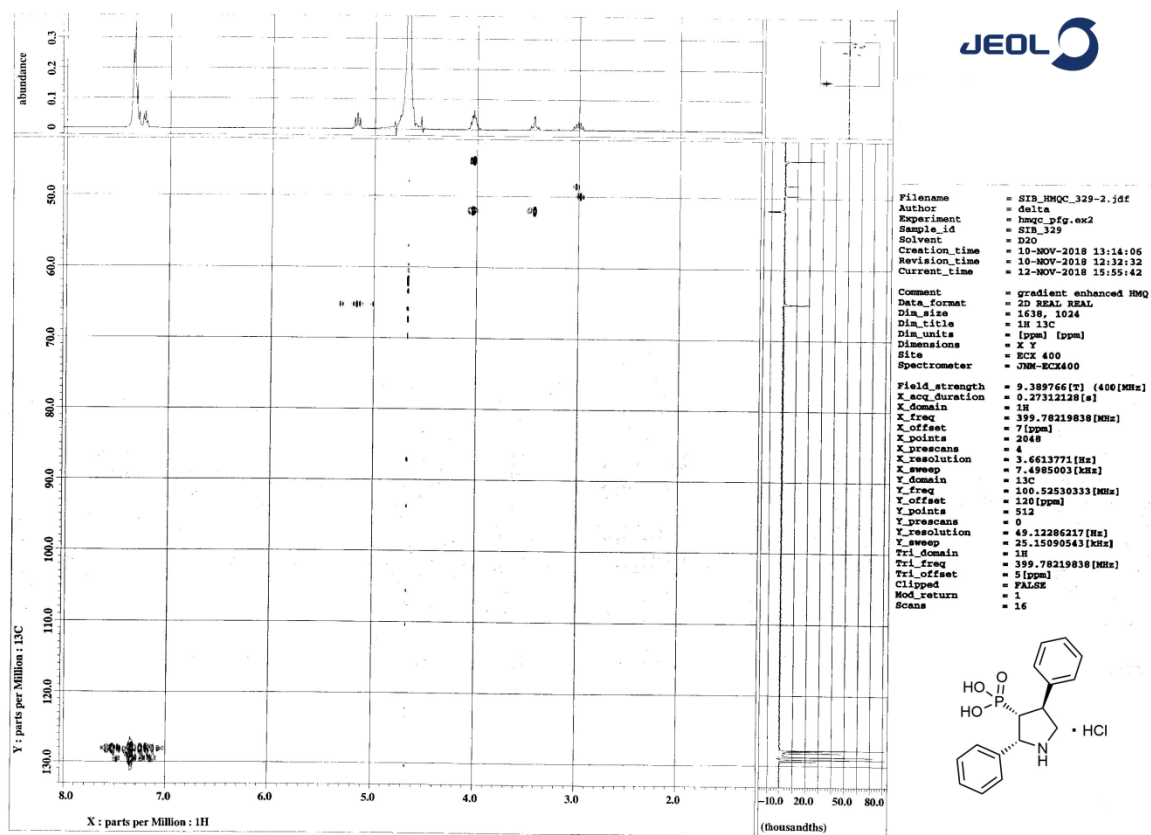



<sup>31</sup>P NMR spectra of (2*R*,3*R*,4*S*)-2,4-Diphenylpyrrolidin-3-ylphosphonic acid hydrochloride (**11a**) in D<sub>2</sub>O

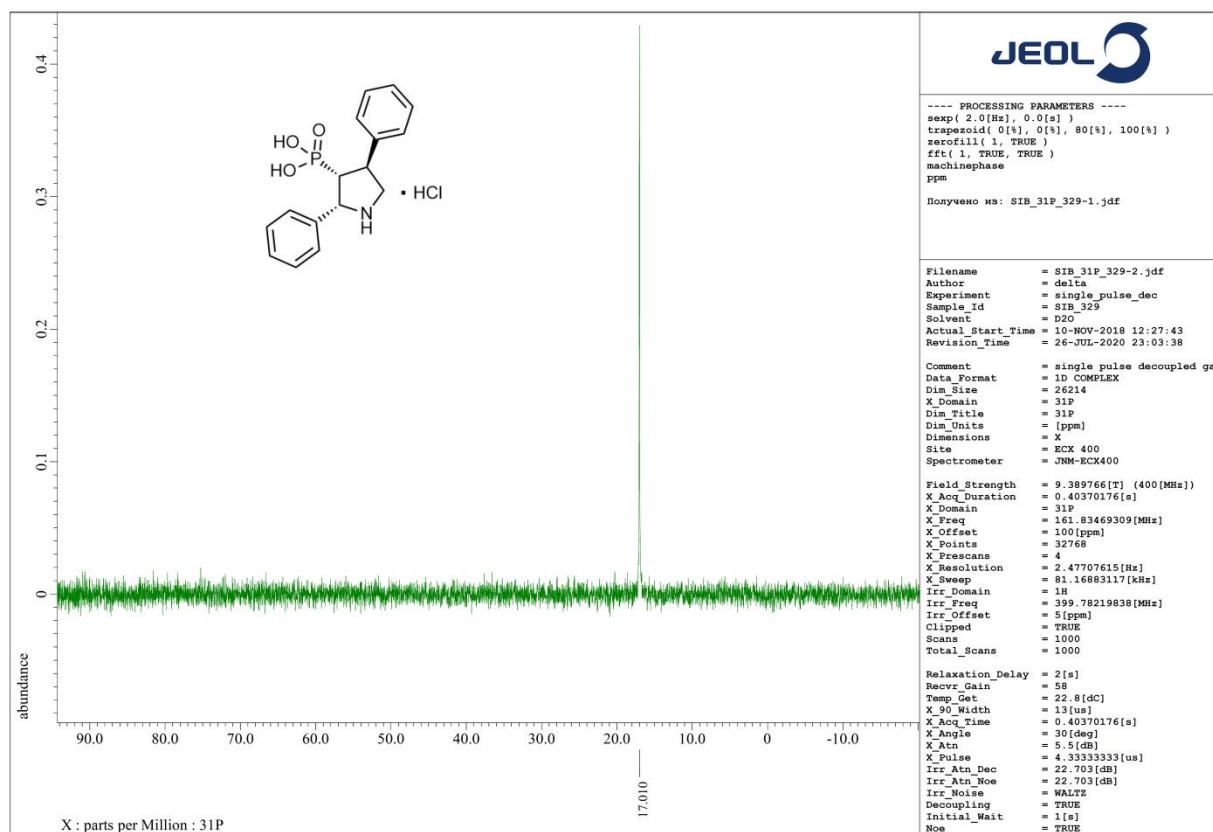

HRMS of (2*R*,3*R*,4*S*)-2,4-Diphenylpyrrolidin-3-ylphosphonic acid hydrochloride (**11a**)

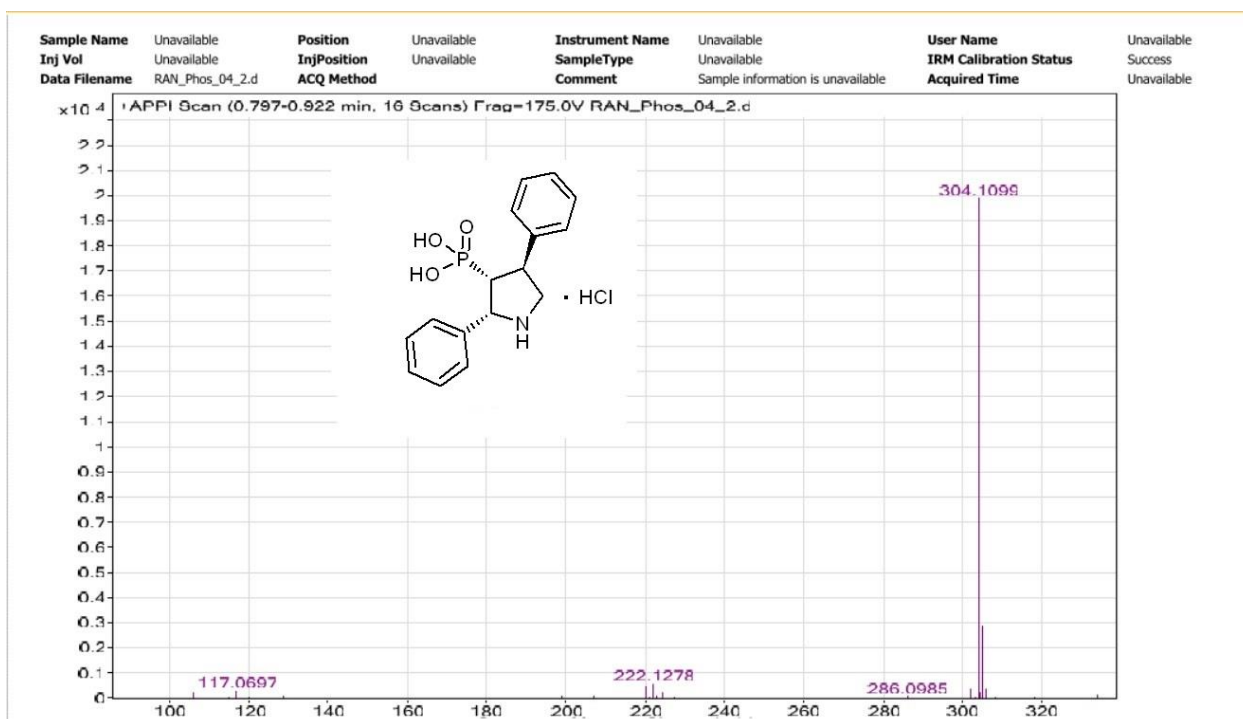



**(11b)**

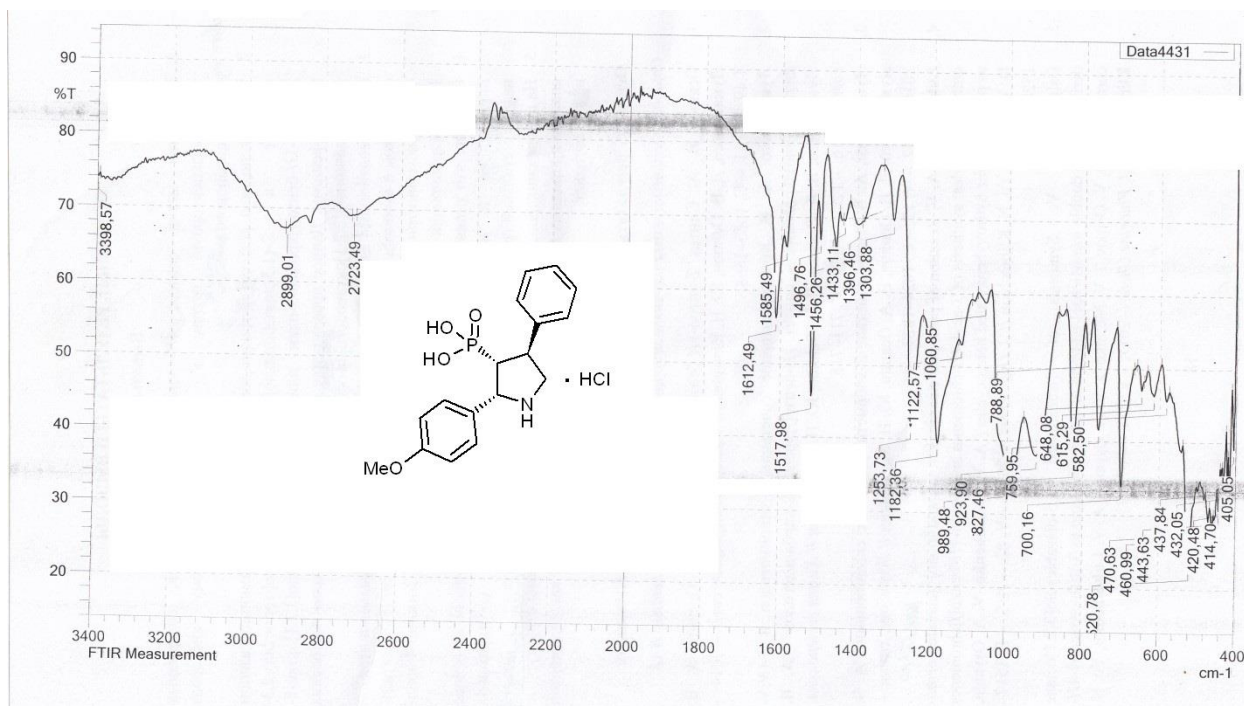

(11b) in DMSO- $d^6$

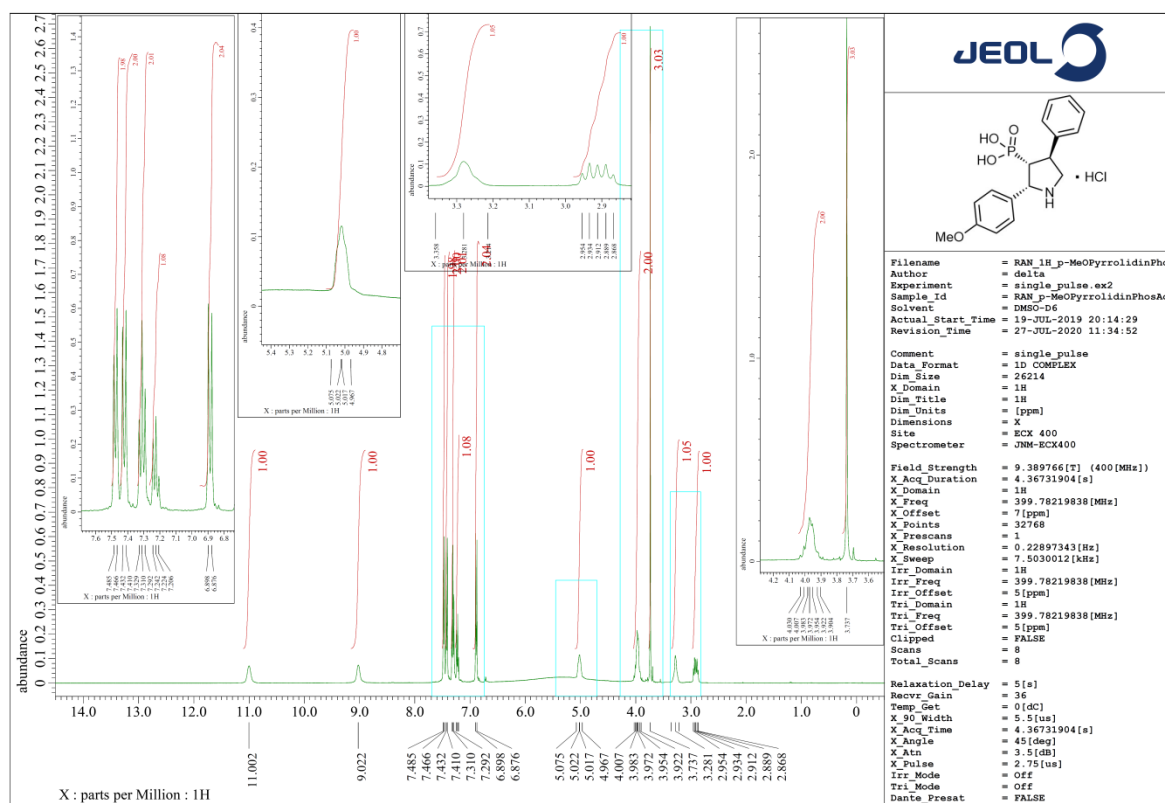



<sup>13</sup>C NMR spectra of (2*R*,3*R*,4*S*)-2-(4-methoxyphenyl)-4-phenylpyrrolidin-3-ylphosphonic acid hydrochloride (**11b**) in DMSO-*d*<sup>6</sup>

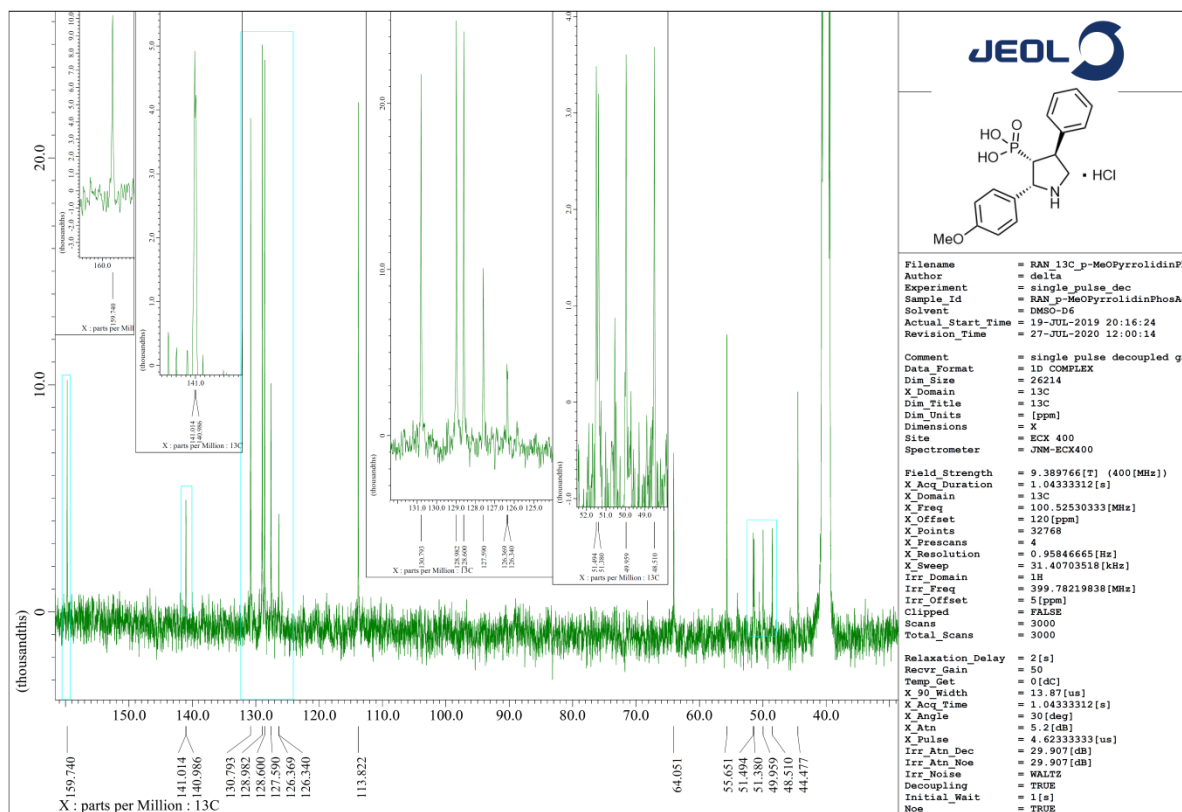

DEPT NMR spectra of (2*R*,3*R*,4*S*)-2-(4-methoxyphenyl)-4-phenylpyrrolidin-3-ylphosphonic acid hydrochloride (**11b**) in DMSO-*d*<sup>6</sup>

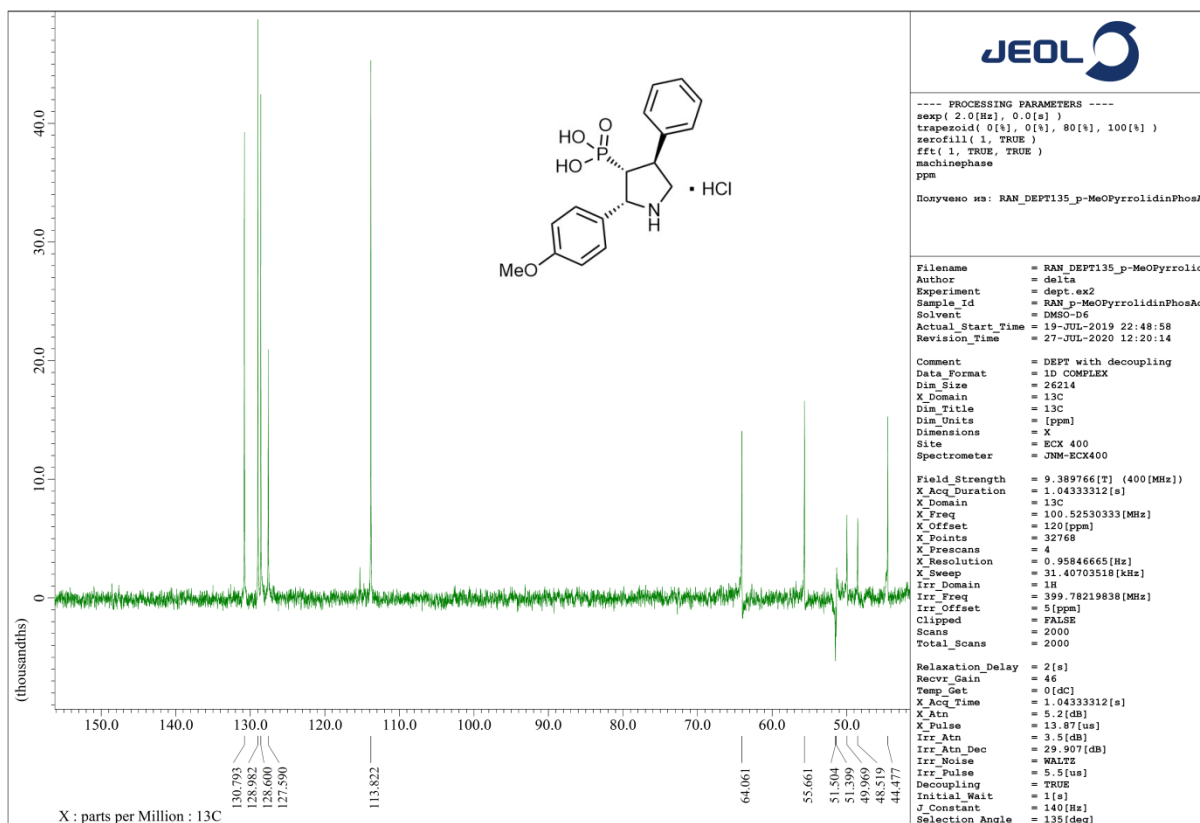



<sup>31</sup>P NMR spectra of (2*R*,3*R*,4*S*)-2-(4-methoxyphenyl)-4-phenylpyrrolidin-3-ylphosphonic acid hydrochloride (**11b**) in DMSO-*d*<sup>6</sup>

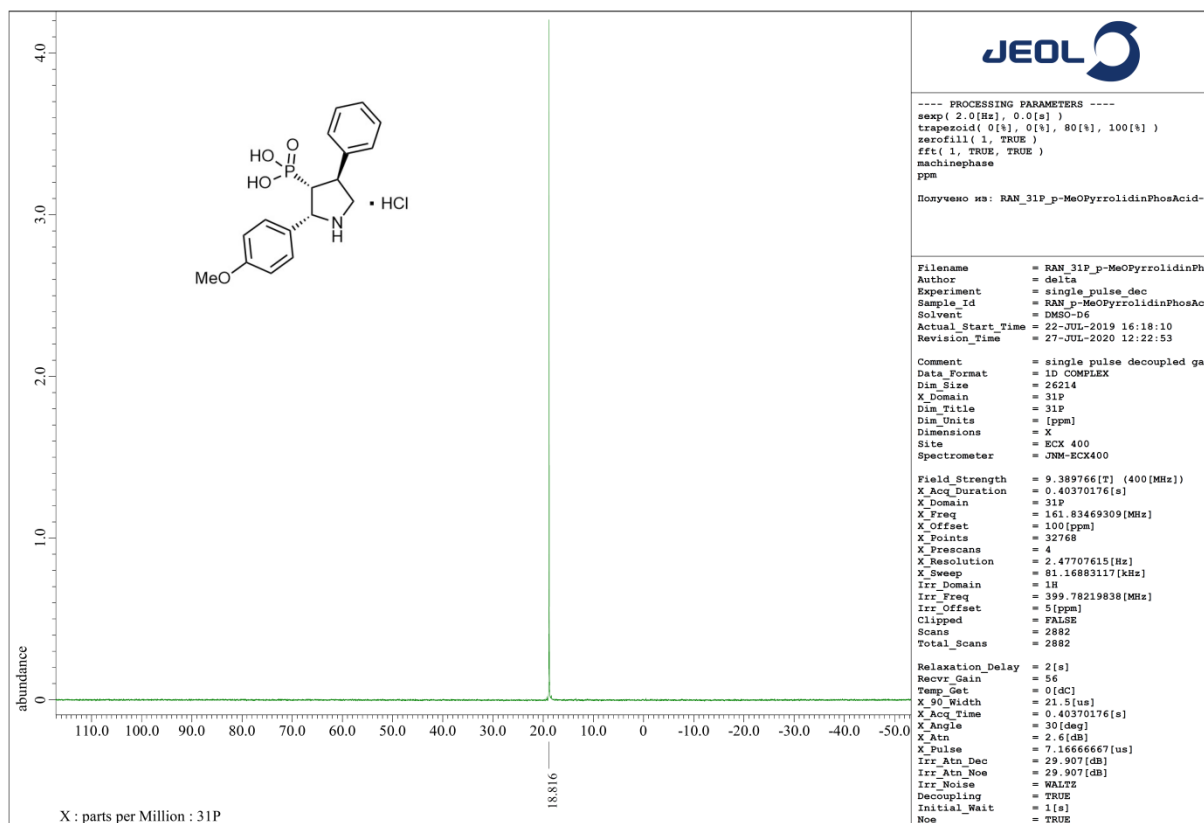

HRMS of (2*R*,3*R*,4*S*)-2-(4-methoxyphenyl)-4-phenylpyrrolidin-3-ylphosphonic acid hydrochloride (**11b**)

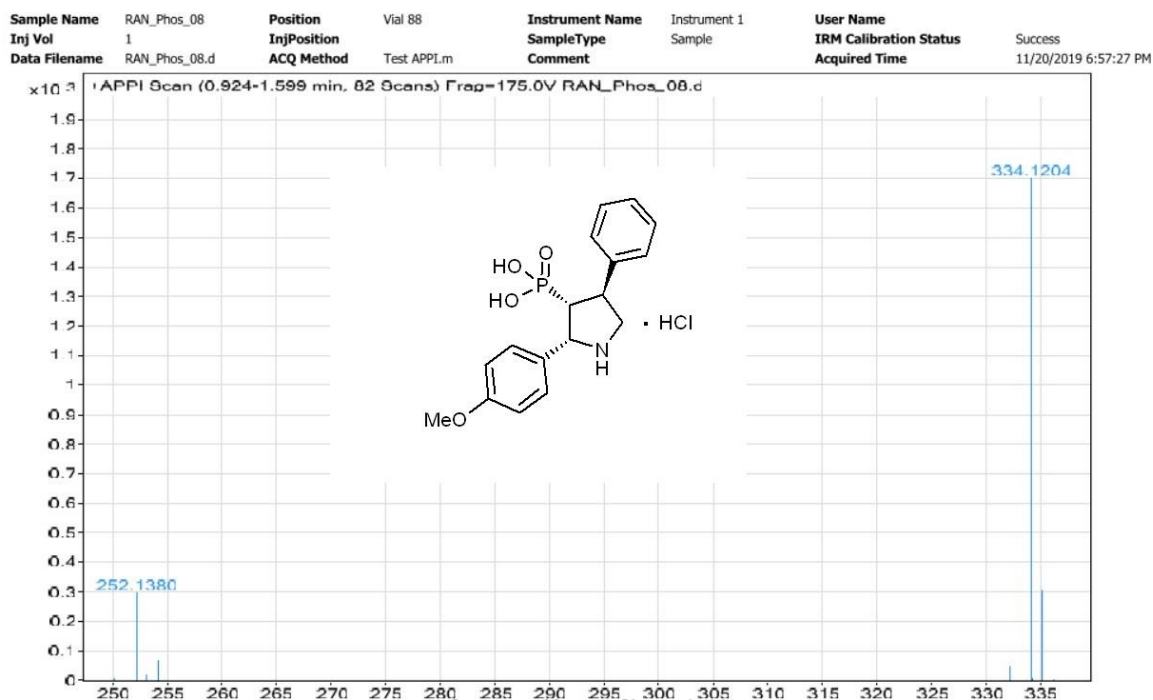



FTIR spectra of (2*R*,3*R*,4*S*)-2-(3-methoxyphenyl)-4-phenylpyrrolidin-3-ylphosphonic acid hydrochloride

(11c)

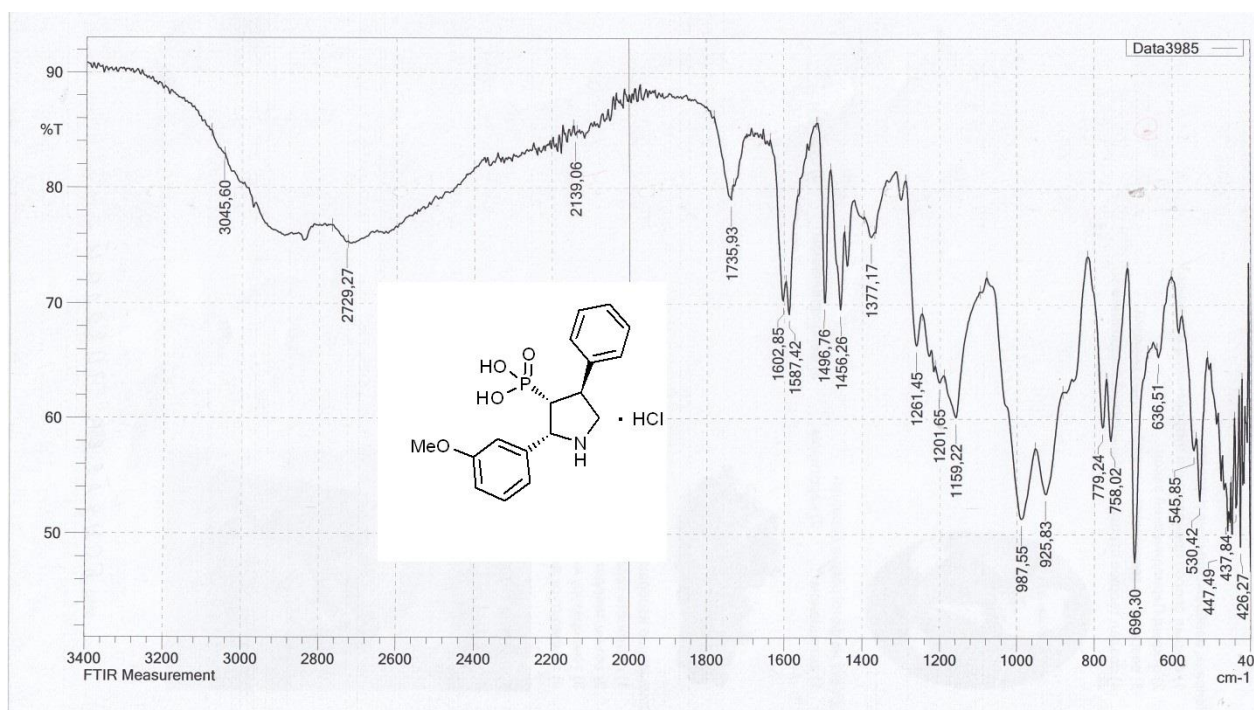

<sup>1</sup>H NMR spectra of (2*R*,3*R*,4*S*)-2-(3-methoxyphenyl)-4-phenylpyrrolidin-3-ylphosphonic acid hydrochloride

(11c) in DMSO-*d*<sup>6</sup>

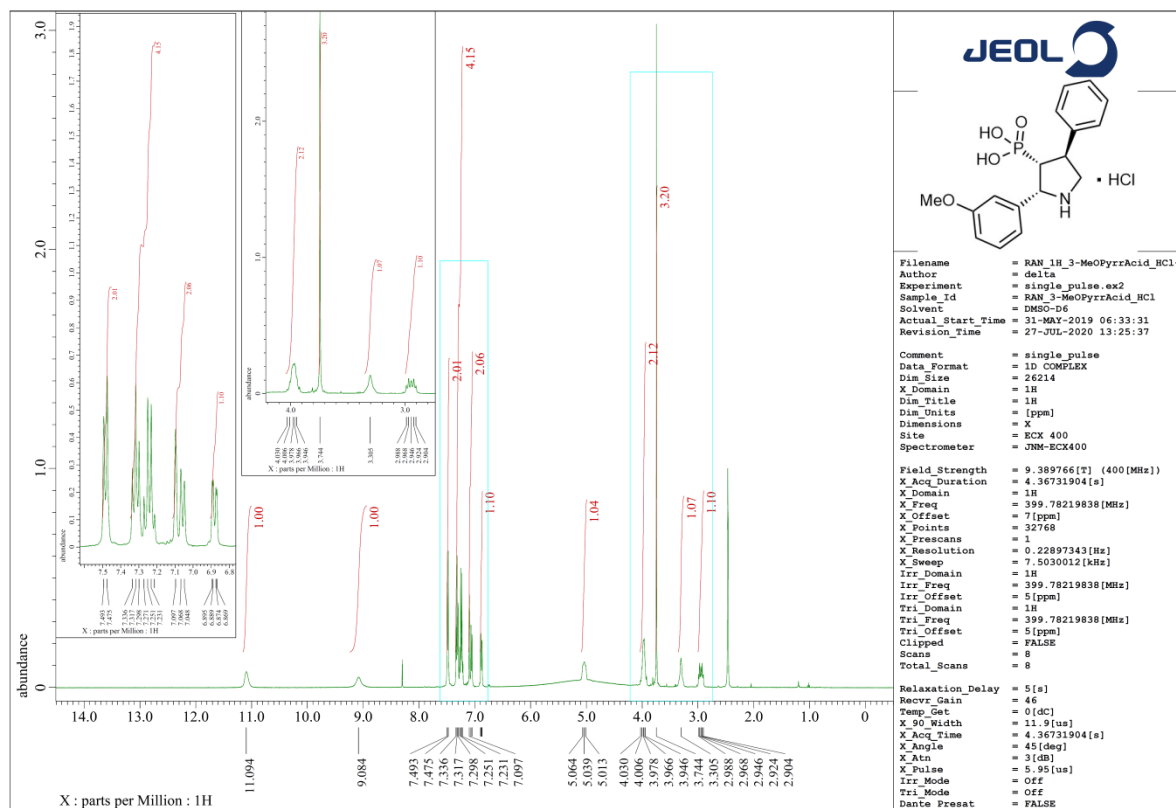



<sup>13</sup>C NMR spectra of (2*R*,3*R*,4*S*)-2-(3-methoxyphenyl)-4-phenylpyrrolidin-3-ylphosphonic acid hydrochloride (**11c**) in DMSO-*d*<sub>6</sub>

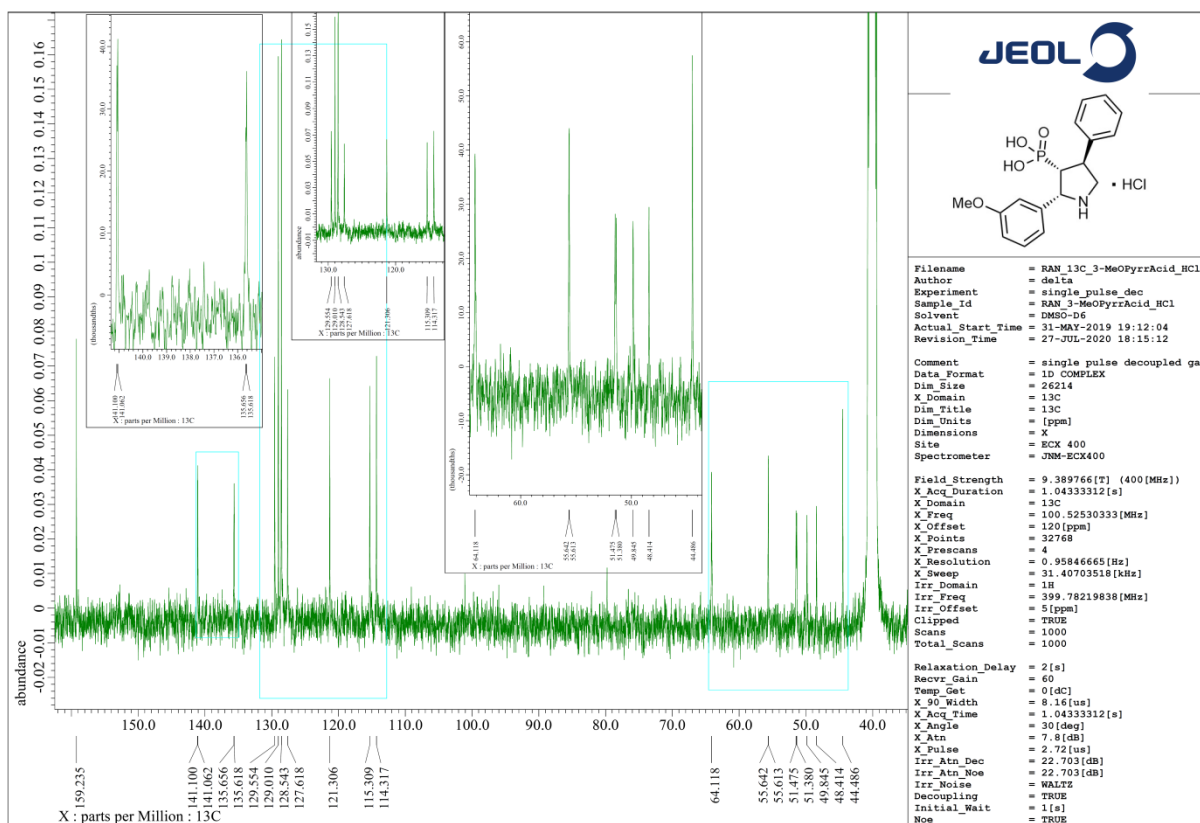

DEPT NMR spectra of (2*R*,3*R*,4*S*)-2-(3-methoxyphenyl)-4-phenylpyrrolidin-3-ylphosphonic acid hydrochloride (**11c**) in DMSO-*d*<sub>6</sub>

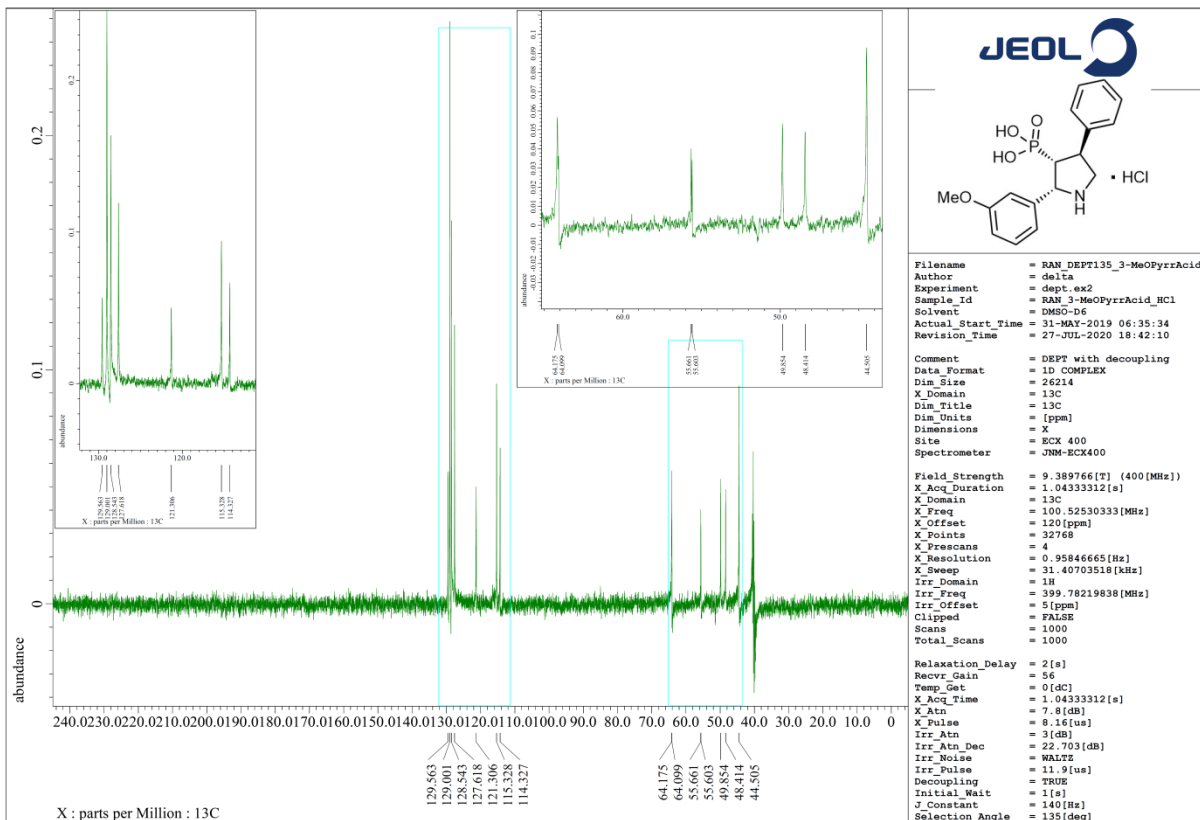



HMQC NMR spectra of (2R,3R,4S)-2-(3-methoxyphenyl)-4-phenylpyrrolidin-3-ylphosphonic acid  
hydrochloride (**11c**) in DMSO-*d*<sup>6</sup>

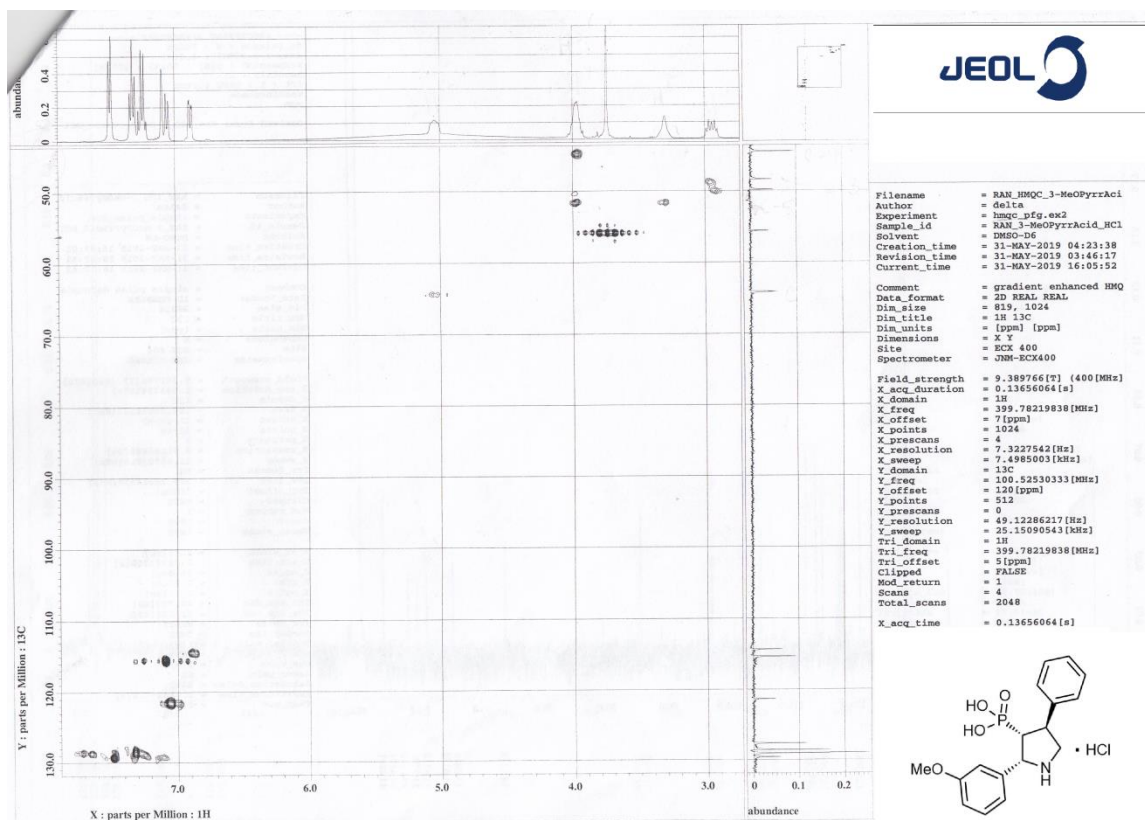

HMQC NMR spectra of (2R,3R,4S)-2-(3-methoxyphenyl)-4-phenylpyrrolidin-3-ylphosphonic acid  
hydrochloride (**11c**) in DMSO-*d*<sup>6</sup>

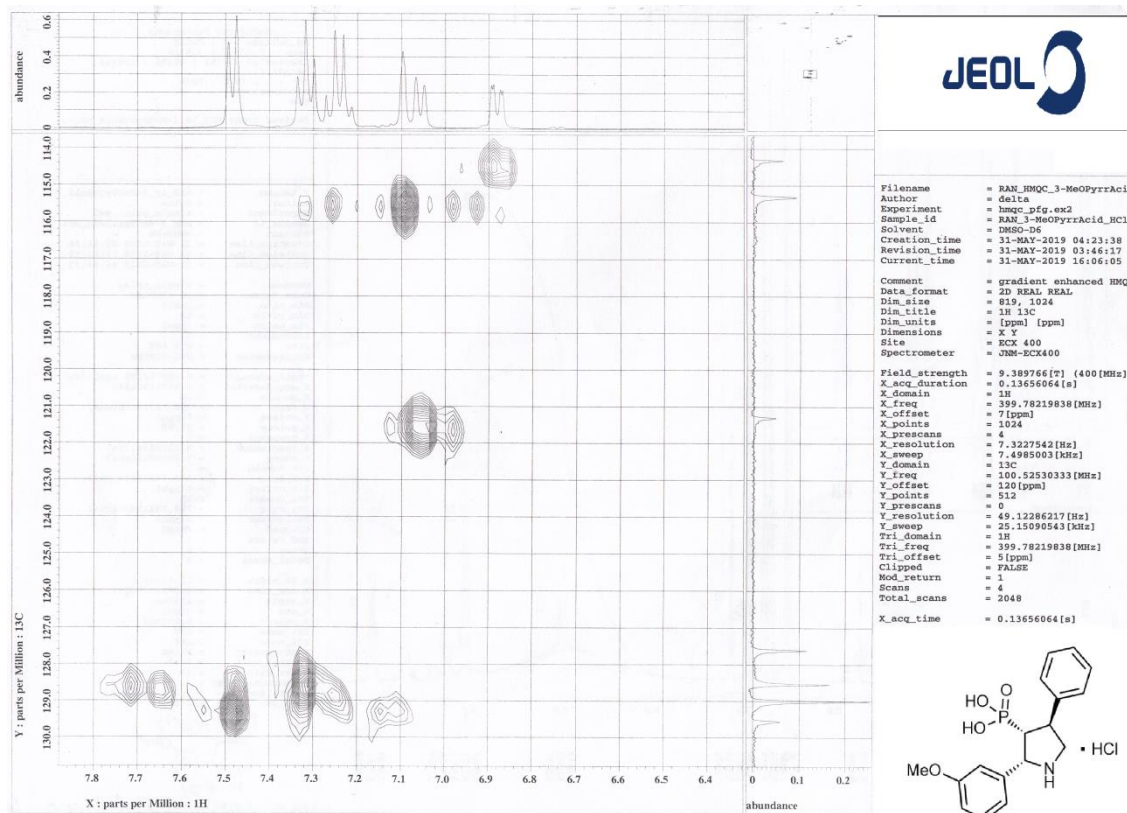



NOESY NMR spectra of (2*R*,3*R*,4*S*)-2-(3-methoxyphenyl)-4-phenylpyrrolidin-3-ylphosphonic acid hydrochloride (**11c**) in DMSO-*d*<sup>6</sup>

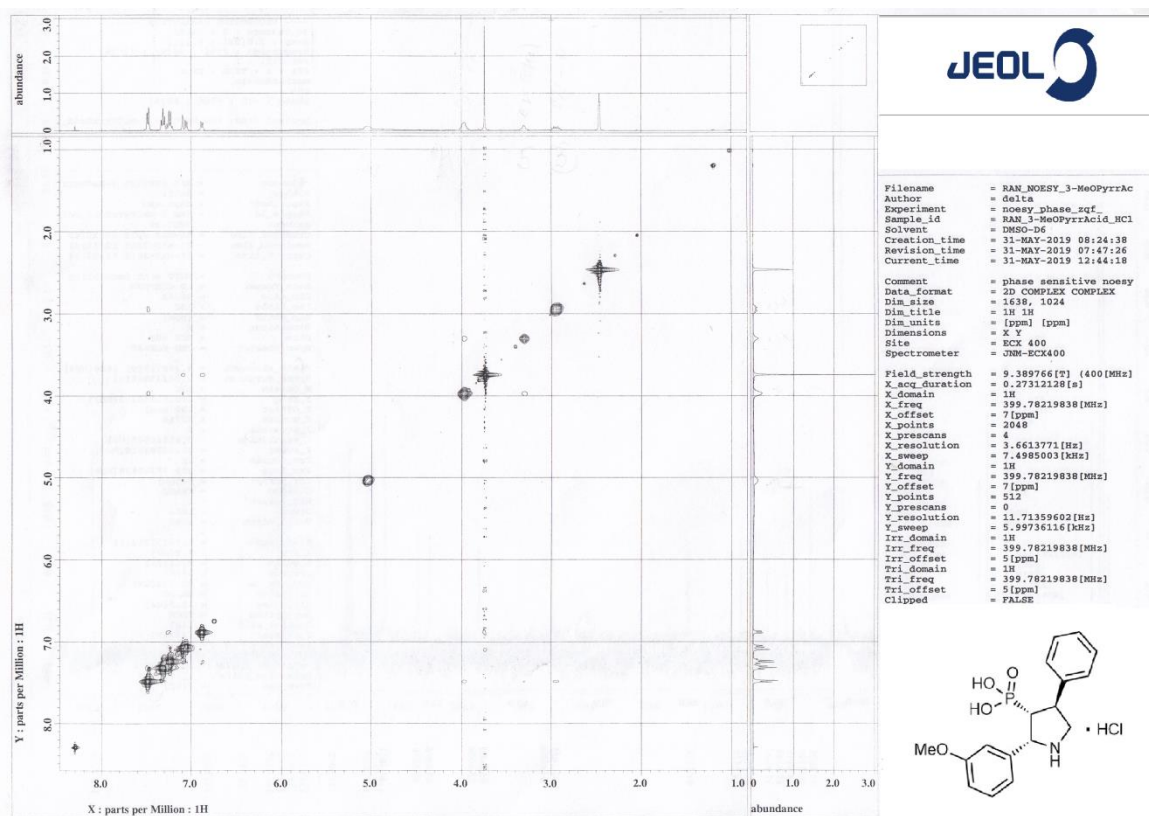

<sup>31</sup>P NMR spectra of (2*R*,3*R*,4*S*)-2-(3-methoxyphenyl)-4-phenylpyrrolidin-3-ylphosphonic acid hydrochloride (**11c**) in DMSO-*d*<sup>6</sup>

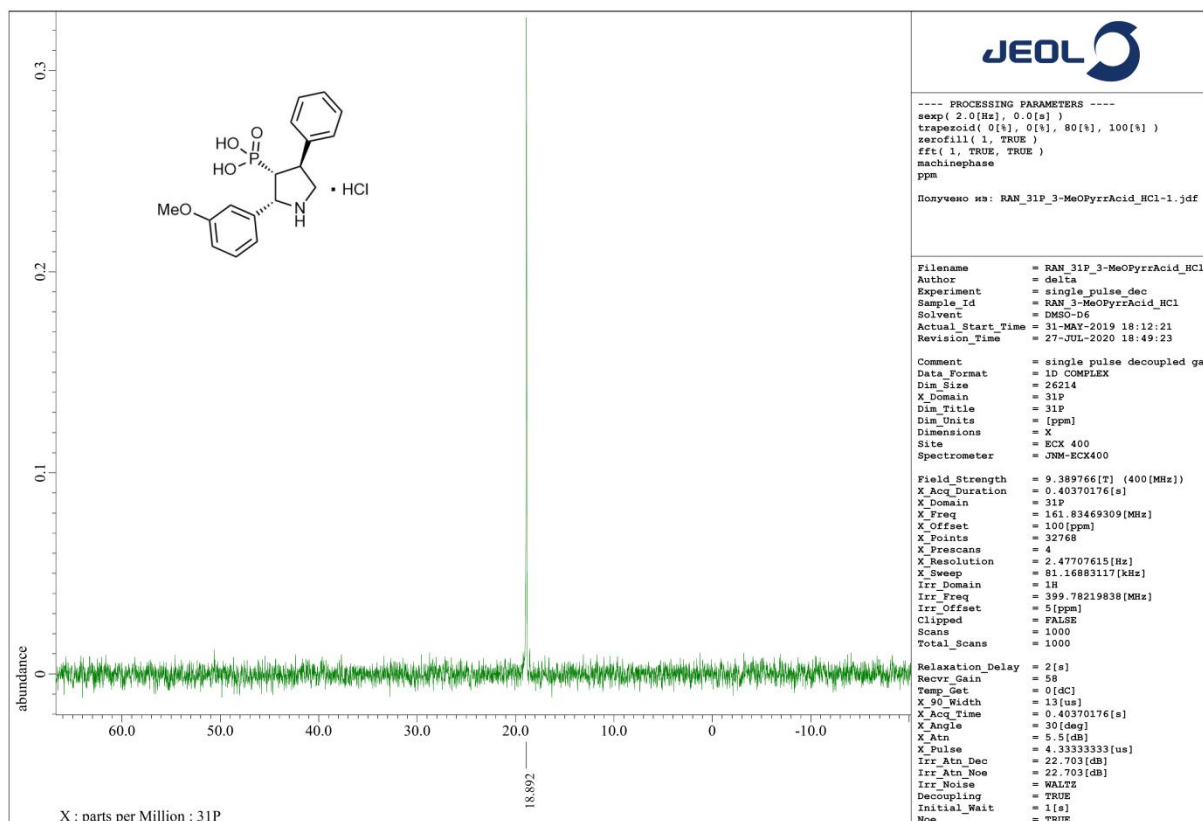



HRMS of (2*R*,3*R*,4*S*)-2-(3-methoxyphenyl)-4-phenylpyrrolidin-3-ylphosphonic acid hydrochloride (**11c**)

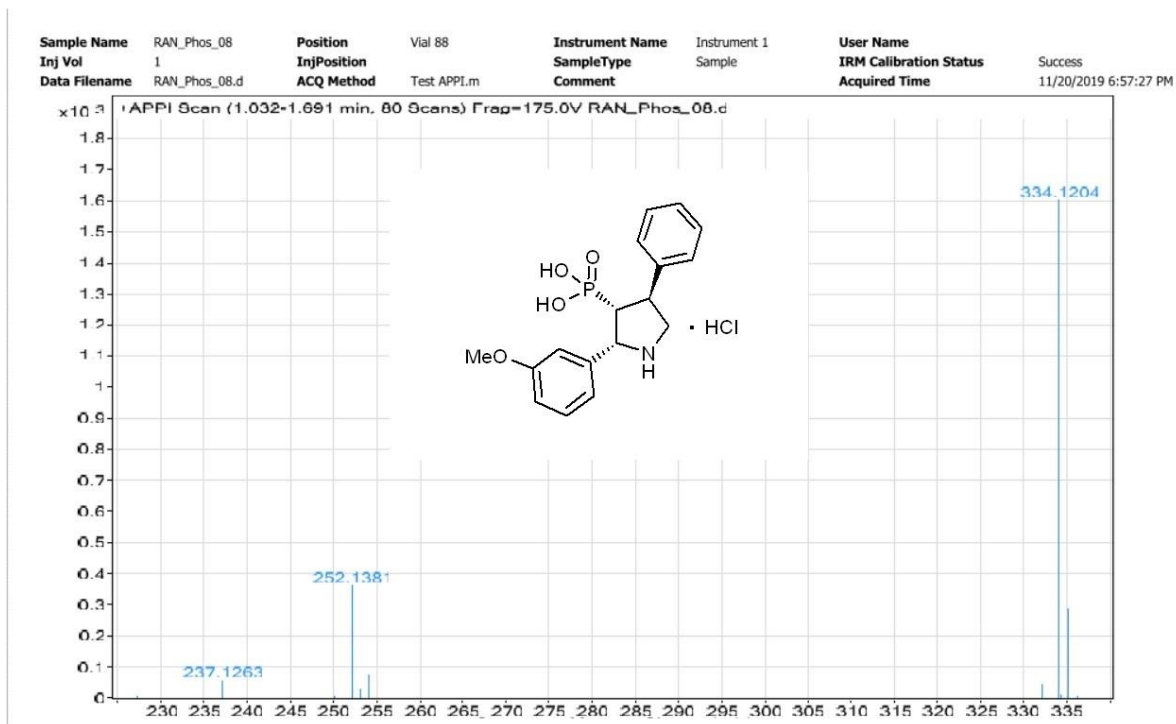

FTIR spectra of (2*R*,3*R*,4*S*)-2-methyl-4-phenylpyrrolidin-3-ylphosphonic acid hydrochloride (**11d**)

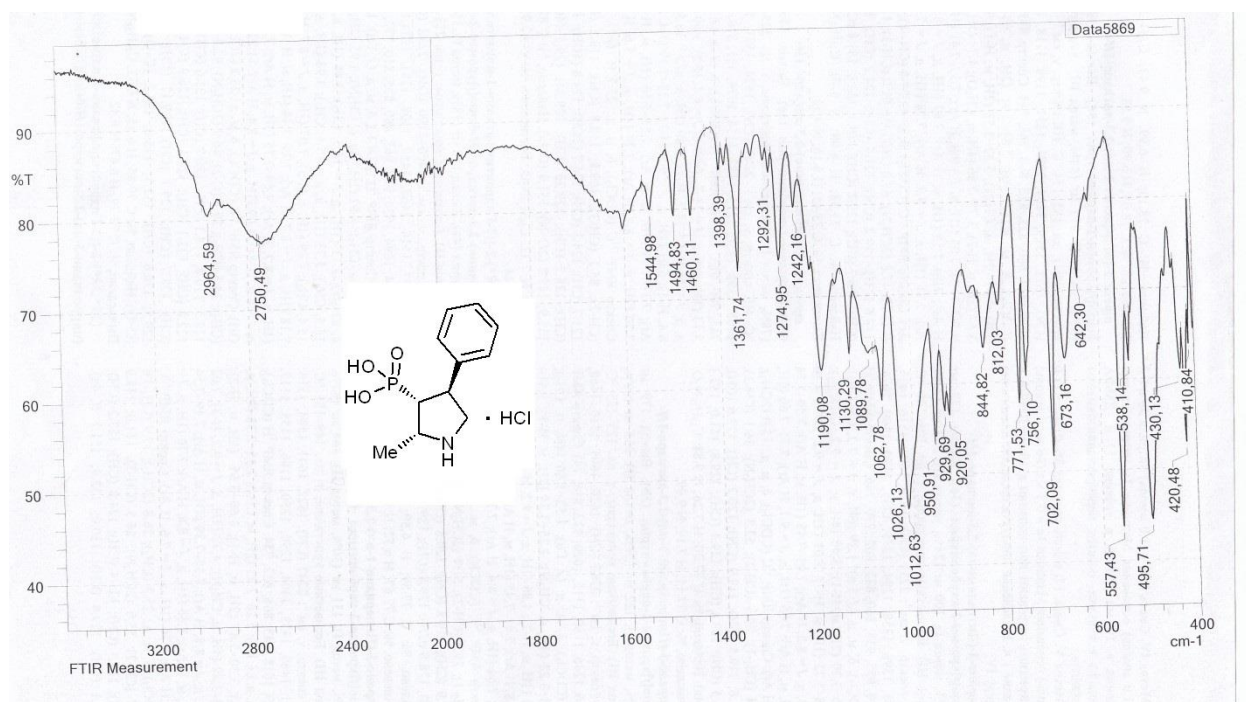



<sup>1</sup>H NMR spectra of (2*R*,3*R*,4*S*)-2-methyl-4-phenylpyrrolidin-3-ylphosphonic acid hydrochloride (**11d**) in

D<sub>2</sub>O

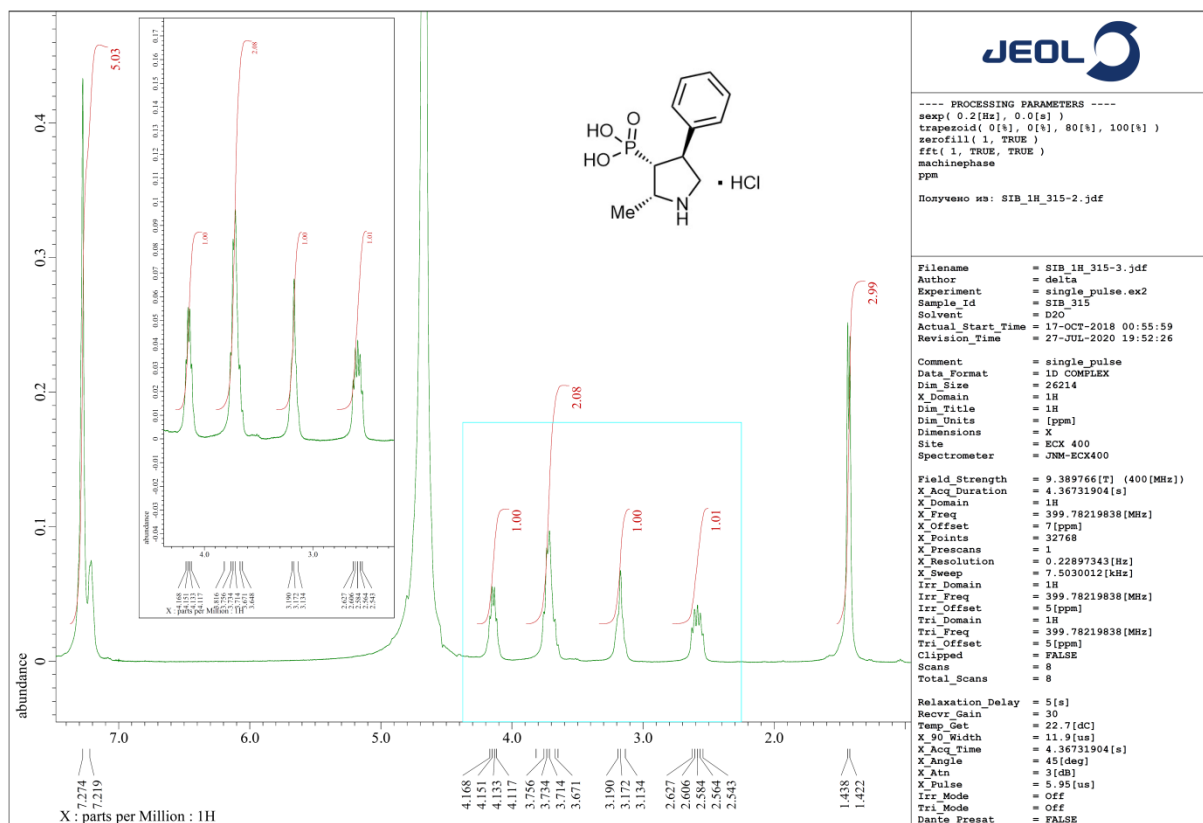

<sup>13</sup>C NMR spectra of (2*R*,3*R*,4*S*)-2-methyl-4-phenylpyrrolidin-3-ylphosphonic acid hydrochloride (**11d**) in

D<sub>2</sub>O

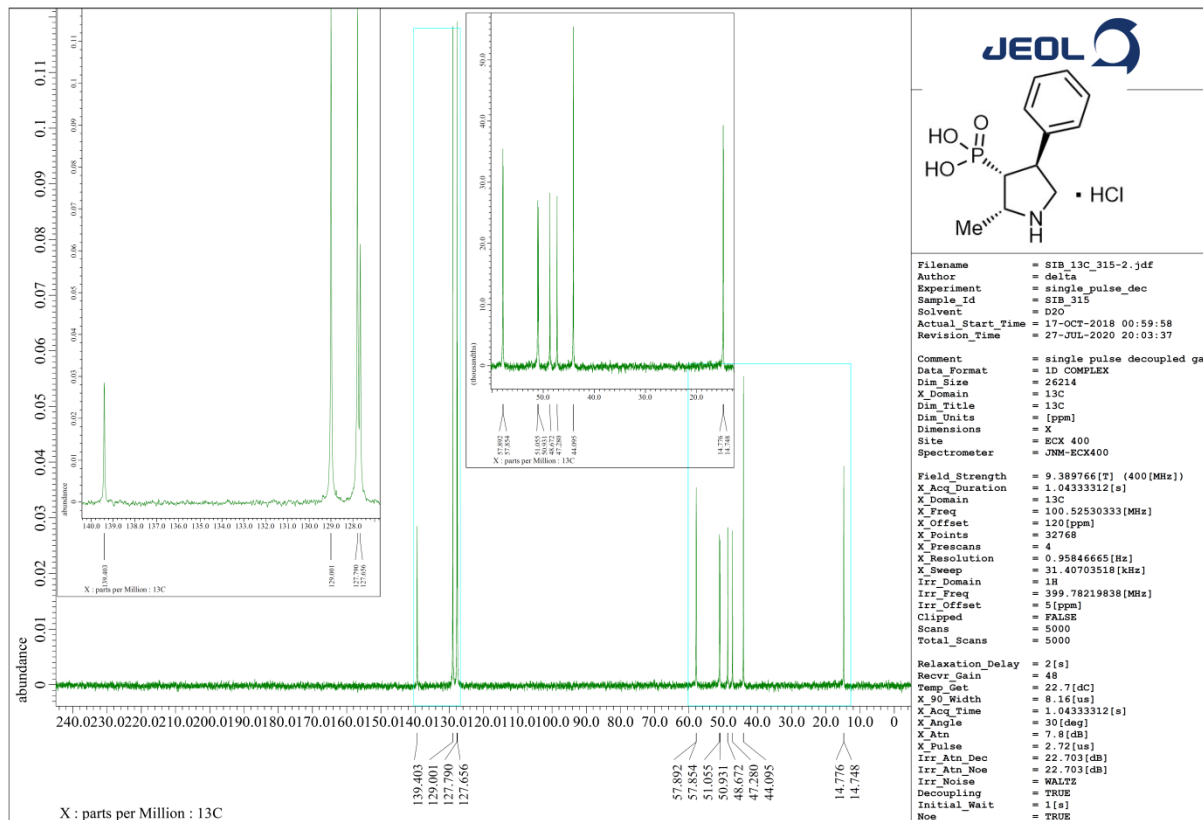



DEPT NMR spectra of (2*R*,3*R*,4*S*)-2-methyl-4-phenylpyrrolidin-3-ylphosphonic acid hydrochloride (**11d**) in

D<sub>2</sub>O

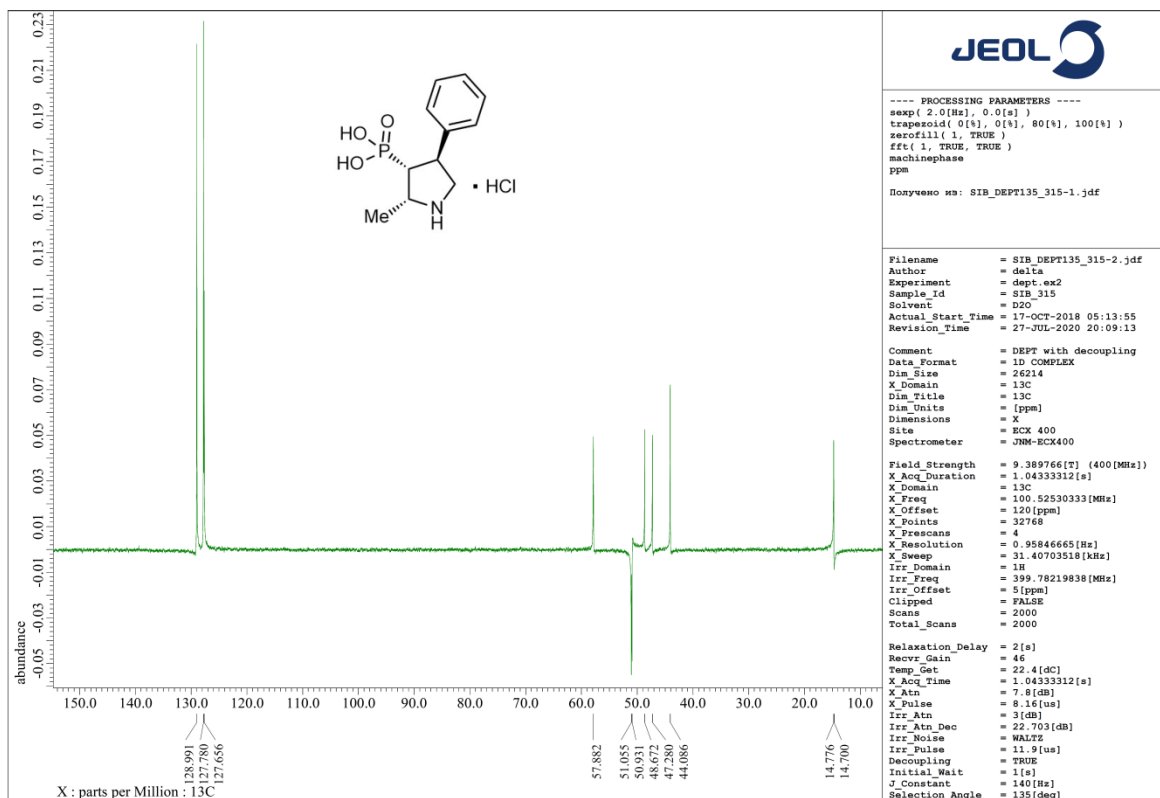

HMQC NMR spectra of (2*R*,3*R*,4*S*)-2-methyl-4-phenylpyrrolidin-3-ylphosphonic acid hydrochloride (**11d**)

in D<sub>2</sub>O

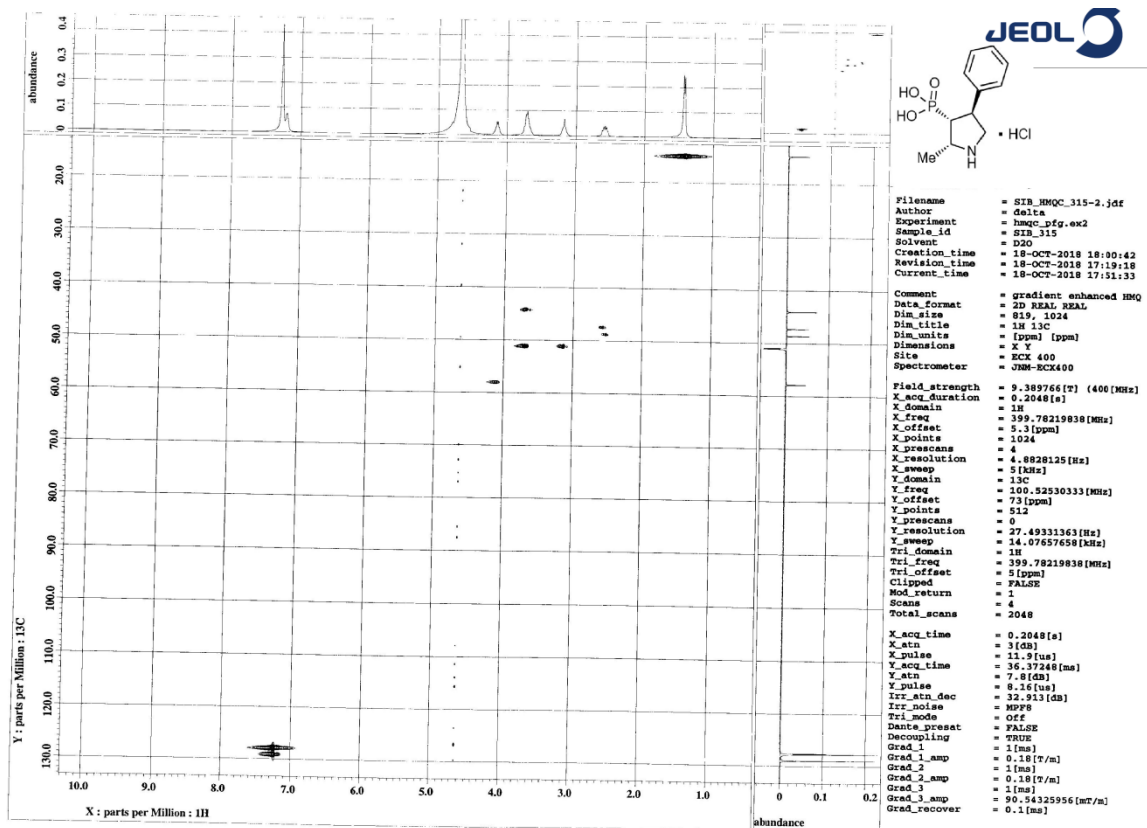



HMQC NMR spectra of (2*R*,3*R*,4*S*)-2-methyl-4-phenylpyrrolidin-3-ylphosphonic acid hydrochloride (**11d**)  
in D<sub>2</sub>O

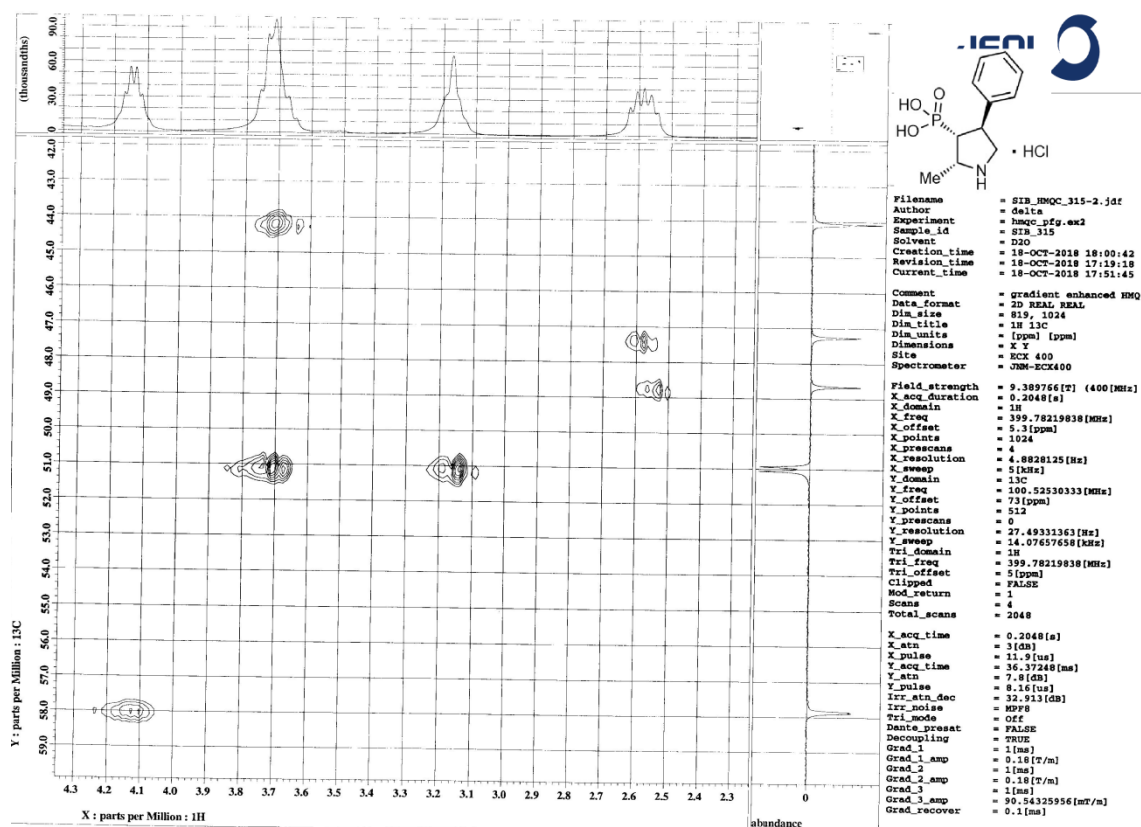

<sup>31</sup>P NMR spectra of (2*R*,3*R*,4*S*)-2-methyl-4-phenylpyrrolidin-3-ylphosphonic acid hydrochloride (**11d**) in  
D<sub>2</sub>O

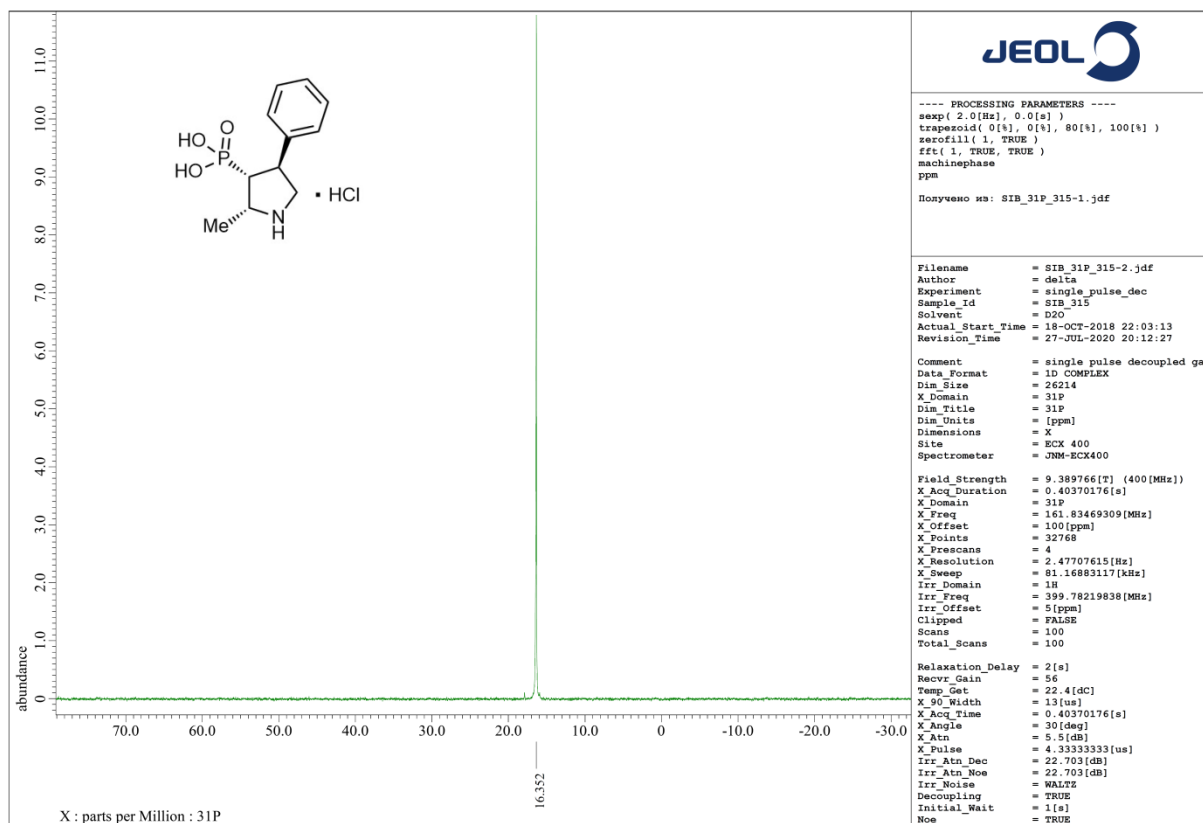



# HRMS of (2*R*,3*R*,4*S*)-2-methyl-4-phenylpyrrolidin-3-ylphosphonic acid hydrochloride (**11d**)

|               |               |             |             |                 |              |                        |                       |
|---------------|---------------|-------------|-------------|-----------------|--------------|------------------------|-----------------------|
| Sample Name   | RAN_Phos_05   | Position    | Vial 85     | Instrument Name | Instrument 1 | User Name              |                       |
| Inj Vol       | 1             | InjPosition |             | SampleType      | Sample       | IRM Calibration Status | Success               |
| Data Filename | RAN_Phos_05.d | ACQ Method  | Test APPL.m | Comment         |              | Acquired Time          | 11/20/2019 6:25:23 PM |

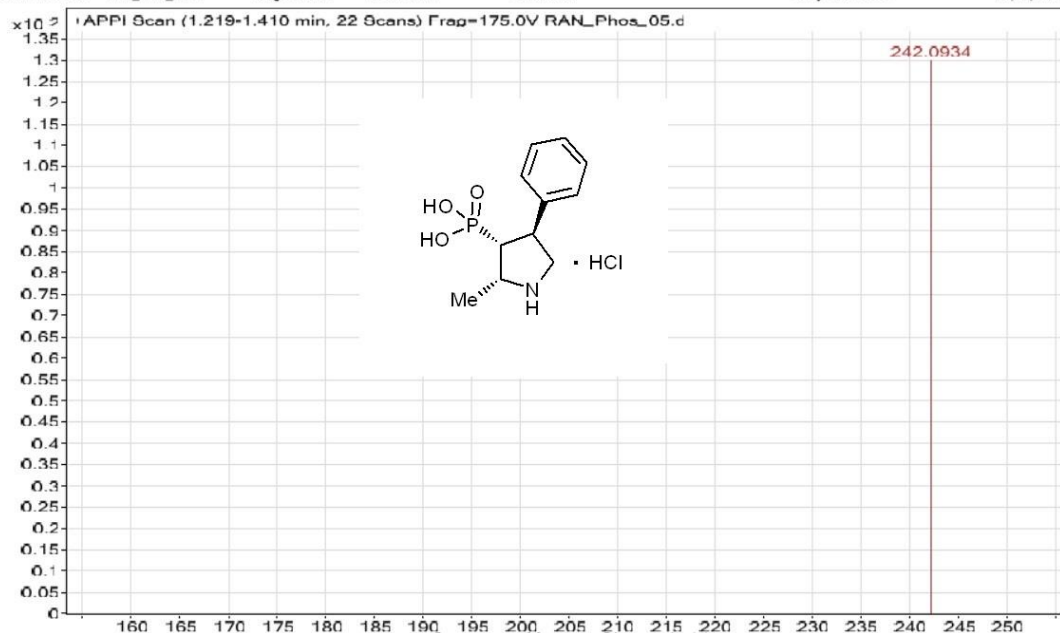

## FTIR spectra of dimethyl [(2*S*,3*R*,4*S*,5*S*,6*R*)-6-ethyl-2-hydroxy-2-methyl-5-nitro-4-phenyltetrahydro-2*H*-pyran-3-yl)phosphonate (**13a**)

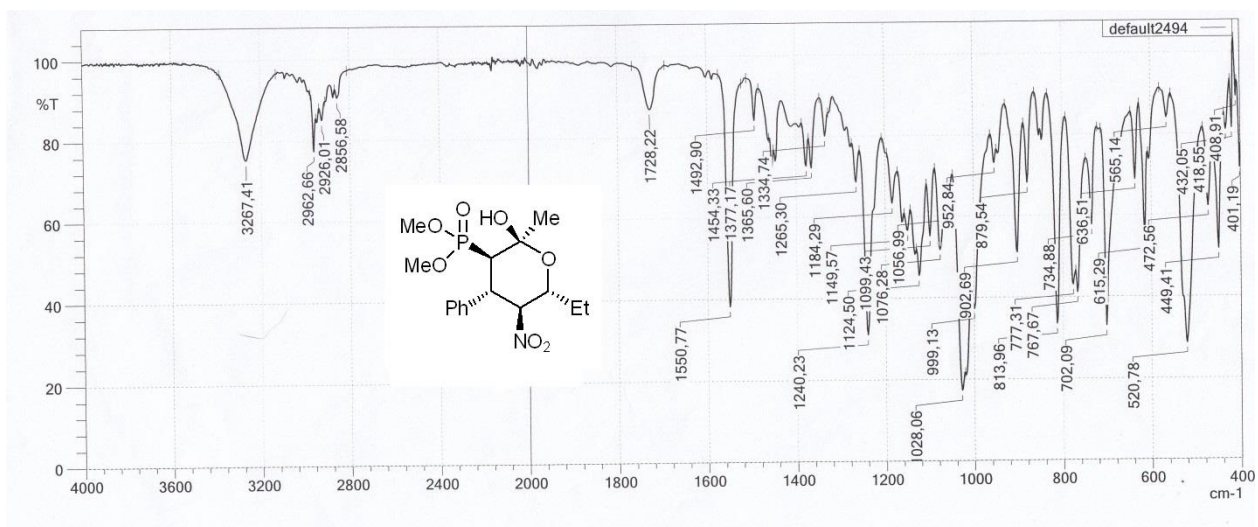



2H-pyran-3-yl)phosphonate (**13a**) in CDCl<sub>3</sub>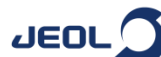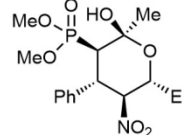

```

Filename          = RAN_1H_tetrahydroypr-3.j
PilotName         = delta
Experiment        = single_pulse.ex2
Sample_ID         = RAN_tetrahydroypr
Solvent           = CDCl3CDCl3-D
Actual_Start_Time = 27-APR-2018 17:42:20
Revision_Time     = 27-JUL-2020 23:34:10

Comment           = single pulse
Data_Format       = 1D COMPLEX
Dim_Size          = 26214
X_Domain          = 1H
X_Title           = 1H
Dim_Units         = [ppm]
Dimensions        = X
Site              = ECK 400
Spectrometer      = JNM-ECK400

Field_Strength    = 9.389766[T] (400[MHz])
Acq_Duration      = 3.36731904[s]
X_Domain          = 1H
X_Freq            = 399.78219838 [MHz]
X_Offset          = 7[ppm]
Points            = 2768
Prescans          = 1
X_Resolution      = 0.2289343[Hz]
X_Sweep           = 7.5030012[kHz]
X_Domain          = 1H
Irr_Freq          = 399.78219838 [MHz]
Irr_Offset        = 5[ppm]
Irr_Domain        = 1H
X_Domain          = 1H
Irr_Freq          = 399.78219838 [MHz]
Tri_Offset        = 5[ppm]
Clipped           = FALSE
Scans             = 8
Total_Scans       = 8

Relaxation_Delay  = 5[s]
Recvr_Gain        = 36
Temp_Gat          = 30[OC]
X_90_Width        = 13.9[us]
Acq_Time          = 4.36731904[s]
X_Angle           = 45[deg]
X_Ato             = 3[deg]
X_Pulse           = 9.95[us]
Irr_Mode          = Off
Irr_Mode          = Off
DANTE_Pressat     = FALSE

```

2*H*-pyran-3-yl)phosphonate (**13a**) in CDCl<sub>3</sub>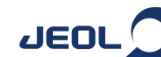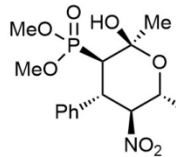

```

---- PROCESSING PARAMETERS ----
sexp( 2.0[Hz], 0.0[s] )
trapezoid( 0[%], 0[%], 80[%], 100[%] )
zerofill( 1, TRUE )
fft( 1, TRUE, TRUE )
machinephase
ppm

```

Получено из: RAN\_13C\_tetrahydropyr-2.jdf

```

Filename          = RAN_13C_tetrahydopyr-3.j
Author            = delta
Experiment         = single_pulse_dec
Sample_Id         = RAN_tetrahydopyr
Solve             = LSCROPOW-D
Actual_Start_Time = 27-APR-2018 17:46:05
Revision_Time     = 28-JUL-2020 00:32:01

Comment           = single pulse decoupled
Data_Format       = 1D COMPLEX
Dim_Size          = 26214
X_Domain          = 13C
X_Title           = 13C
Dim_Units         = [ppm]
Dimensions        = X
Site              = ECK 400
Spectrometer      = JNM-ECK400

Field_Strength    = 9.398766[T] (400[MHz])
Acq_Duration      = 1.04333312[s]
X_Domain          = 13C
X_Freq            = 100.52530333[MHz]
X_Offset          = 120[ppm]
X_Points          = 2768
X_Frecans         = 4
X_Resolution      = 0.95846665[Hz]
X_Sweep           = 31.40703518[kHz]
Irr_Domain        = 1H
Irr_Freq          = 399.78219838[MHz]
Irr_Offset        = 5[ppm]
Clipped           = FALSE
Scans             = 450
Total_Scans       = 450

Relaxation_Delay  = 2[s]
Recv_Can         = 46
Temp_Get          = 22.6[degC]
X_90_Width        = 8.16[us]
X_Acq_Time        = 1.04333312[s]
X_Angle           = 30[deg]
X_Atn             = 7.8[db]
X_Pulse           = 2.72[us]
Irr_Atn_Dec       = 22.703[db]
Irr_Atn_Noise    = 22.703[db]
Irr_Noise         = WALTZ
Decoupling        = TRUE
Initial_Wait      = 1[s]

```



DEPT NMR spectra of dimethyl [(2*S*,3*R*,4*S*,5*S*,6*R*)-6-ethyl-2-hydroxy-2-methyl-5-nitro-4-phenyltetrahydro-2*H*-pyran-3-yl)phosphonate (**13a**) in CDCl<sub>3</sub>

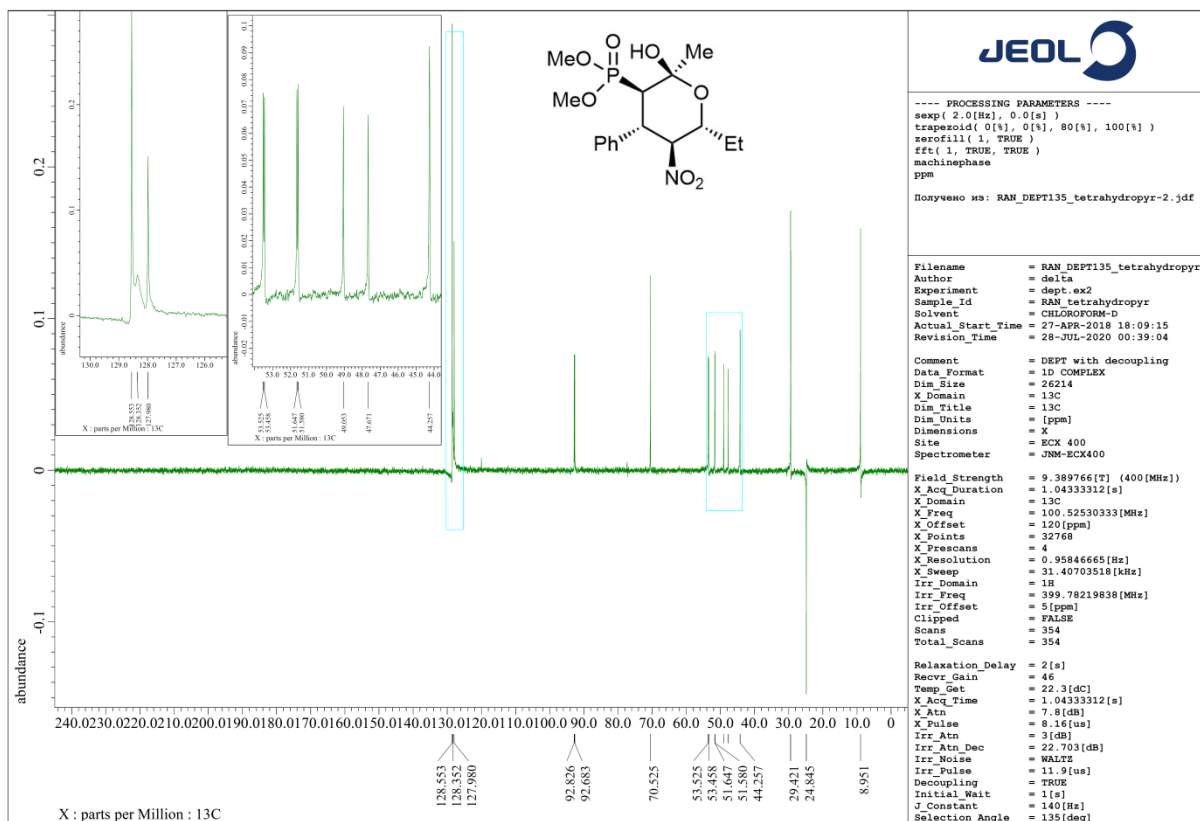

<sup>31</sup>P NMR spectra of dimethyl [(2*S*,3*R*,4*S*,5*S*,6*R*)-6-ethyl-2-hydroxy-2-methyl-5-nitro-4-phenyltetrahydro-2*H*-pyran-3-yl)phosphonate (**13a**) in CDCl<sub>3</sub>

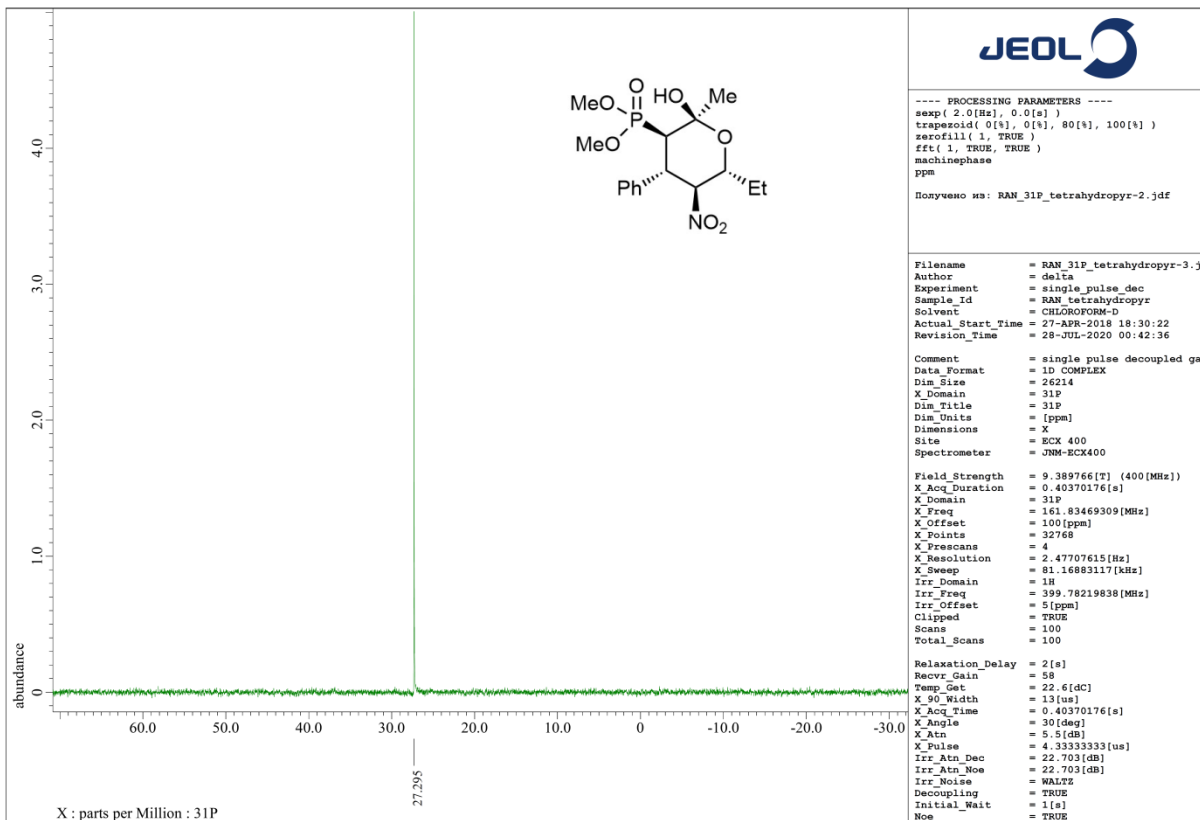



HRMS of dimethyl [(2*S*,3*R*,4*S*,5*S*,6*R*)-6-ethyl-2-hydroxy-2-methyl-5-nitro-4-phenyltetrahydro-2*H*-pyran-3-yl]phosphonate (**13a**)

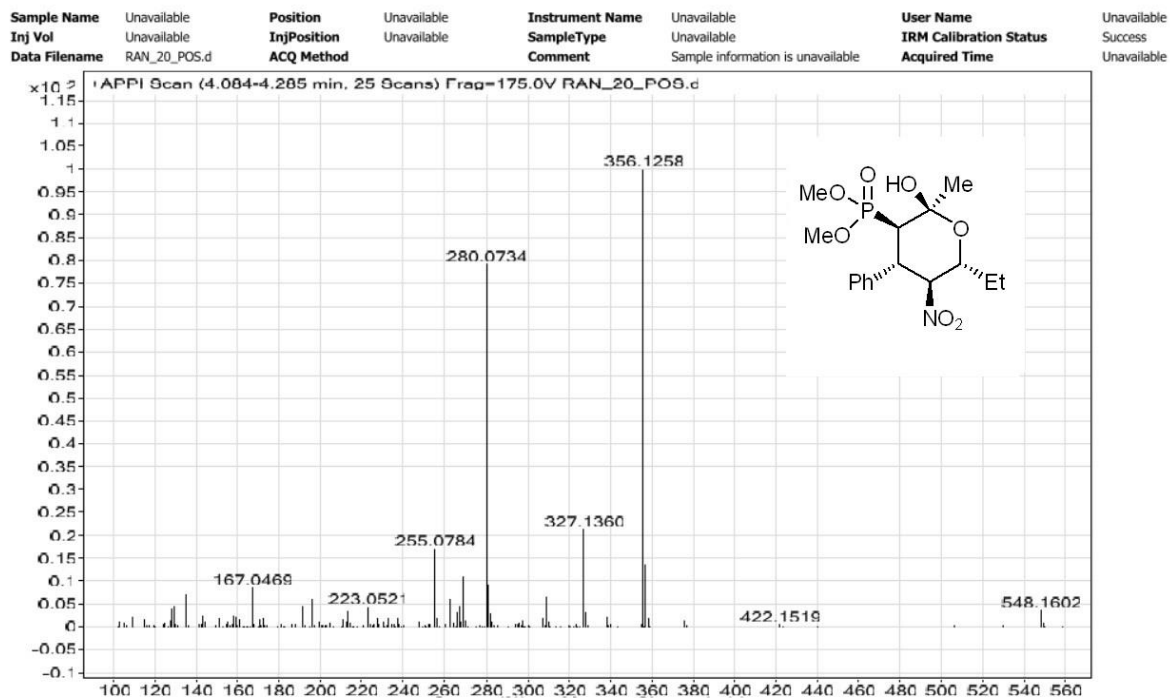

FTIR spectra of dimethyl [(2*S*,3*R*,4*S*,5*S*,6*R*)-2-hydroxy-2,6-dimethyl-5-nitro-4-phenyltetrahydro-2*H*-pyran-3-yl]phosphonate (**13b**)

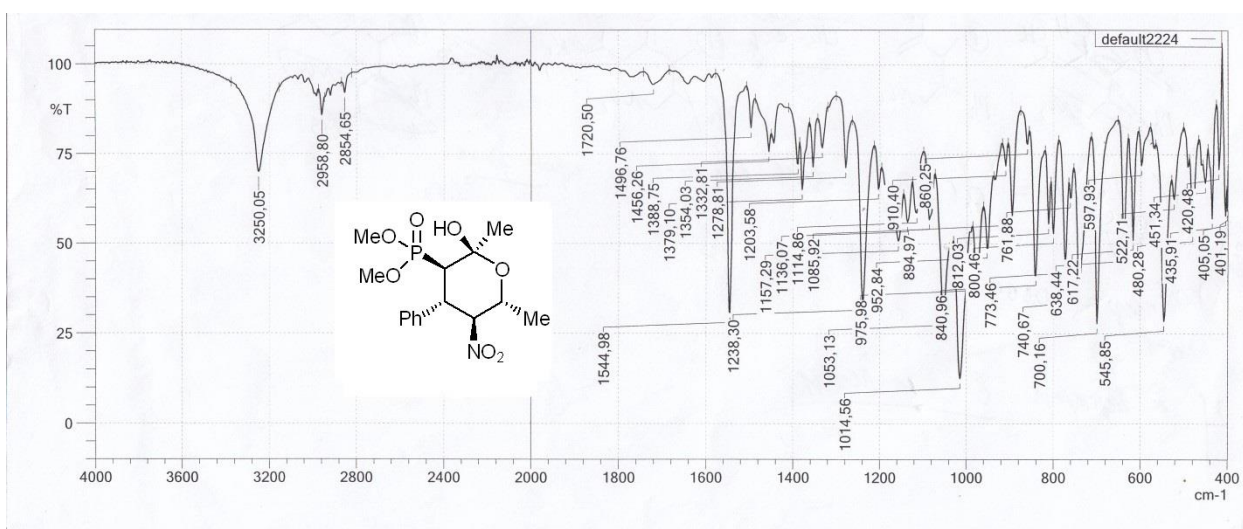



pyran-3-yl]phosphonate (**13b**) in CDCl<sub>3</sub>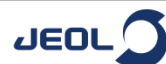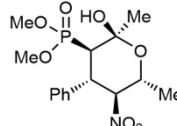

```

Filename           = RAN_1H_Tetrahdydropyran-2
Author            = delta
Experiment         = single_pulse.ex2
Xsolvent_id       = RAN_Tetrahdydropyran-2
Solvent           = CHLOROFORM-D
Actual_StartTime  = 4-MAY-2018 01:09:17
RevisionTime      = 28-JULY-2020 01:04:40

Comment           = single_pulse
Data_Format       = 1D_COMPLEX
Dim_Size          = 26214
X_Domain          = 1H
Dim_Title         = 1H
Dim_Units         = [ppm]
Dimensions        = CX
Site              = CXC 400
Spectrometer      = JNM-ECX400

Field_Strength     = 9.389766[T] (400[MHz])
XAcqDuration      = 4.36731904[s]
X_Domain          = 1H
X_Freq            = 399.78219838 [MHz]
X_Offset          = 7[ppm]
Pulse              = 2768
P_Prescans        = 1
X_Resolution      = 0.22897343[Hz]
X_Sweep           = 7.5030012[kHz]
X_Domain          = 1H
Irr_Freq          = 399.78219838 [MHz]
Irr_Offset        = 5[ppm]
Irr_Domain        = 1H
X_Freq           = 399.78219838 [MHz]
Tri_Offset        = 5[ppm]
Clipped           = FALSE
Scans             = 8
Total_Scans       = 8

Relaxation_Delay   = 5[s]
Recvr_Gain        = 36
Pump_Gat          = 45[deg]
X_90_Width        = 13.9.us(10)
XAcq_Time         = 4.36731904[s]
X_Angle           = 45[deg]
X_Ato             = 3[deg]
X_Pulse           = 95[ppm]
Irr_Mode          = OFF
Tri_Mode          = OFF
DANTE_Pressat     = FALSE

```

pyran-3-yl]phosphonate (**13b**) in  $\text{CDCl}_3$ 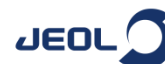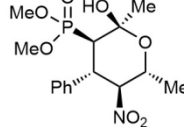

```

---- PROCESSING PARAMETERS ----
sexp( 2.0[Hz], 0.0[s] )
trapezoid( 0[%], 0[%], 80[%], 100[%] )
zerofill( 1, TRUE )
fft( 1, TRUE, TRUE )
machinephase
ppm

```

Получено из: RAN 13C Tetrahydropyran-2-1.idf

|                   |   |                          |
|-------------------|---|--------------------------|
| Filename          | = | RAN_13C_Tetrahedropyran- |
| Author            | = | delc                     |
| Experiment        | = | single_pulse_dec         |
| Sample_Id         | = | RAN_Tetrahedropyran-2    |
| Sample_Prm        | = | CPDPRISM-0               |
| Actual_Start_Time | = | 4-MAY-2018 01:13:18      |
| Revision_Time     | = | 28-JUL-2020 01:24:50     |
| Comment           | = | single pulse decoupled g |
| Data_Format       | = | 1D COMPLEX               |
| Dim_Size          | = | 26214                    |
| X_Domain          | = | 1.6333312[s]             |
| Dim_Title         | = | 13C                      |
| Dim_Units         | = | [ppm]                    |
| Dimensions        | = | X                        |
| Site              | = | CECK 400                 |
| Spectrometer      | = | JNM-ECX400               |
| Field_Strength    | = | 9.389766[T] (400[MHz])   |
| X_Freq            | = | 100.3333312[s]           |
| X_Domain          | = | 13C                      |
| X_Freq            | = | 100.52530333[MHz]        |
| X_Offset          | = | 120[ppm]                 |
| X_Pos             | = | 2768                     |
| X_Prescans        | = | 4                        |
| X_Resolution      | = | 0.95846665[Hz]           |
| X_Sweep           | = | 31.40703518[kHz]         |
| Y_Domain          | = | 13C                      |
| Y_Freq            | = | 399.78219838[MHz]        |
| Y_Offset          | = | 5[ppm]                   |
| Clipped           | = | FALSE                    |
| Scans             | = | 1000                     |
| Total_Scans       | = | 1000                     |
| Relaxation_Delay  | = | 2[s]                     |
| Recvr_Gain        | = | 46                       |
| Temp_Cel          | = | 22.3[dC]                 |
| X_90_Width        | = | 1.1643[s]                |
| X_Acq_Time        | = | 0.804333312[s]           |
| X_Angle           | = | 0[deg]                   |
| X_Atn             | = | 7.8[db]                  |
| X_Pulse           | = | 2.72[us]                 |
| Yrr_Atn_Doe       | = | 22.703[db]               |
| Yrr_Atn_Hoe       | = | 22.703[db]               |
| Yrr_Noise         | = | WALTZ                    |
| Decoupling        | = | TRUE                     |
| Initial_Wait      | = | 1[s]                     |
| Yrr_Prm           | = | WALTZ                    |



DEPT NMR spectra of dimethyl [(2*S*,3*R*,4*S*,5*S*,6*R*)-2-hydroxy-2,6-dimethyl-5-nitro-4-phenyltetrahydro-2*H*-pyran-3-yl]phosphonate (**13b**) in CDCl<sub>3</sub>

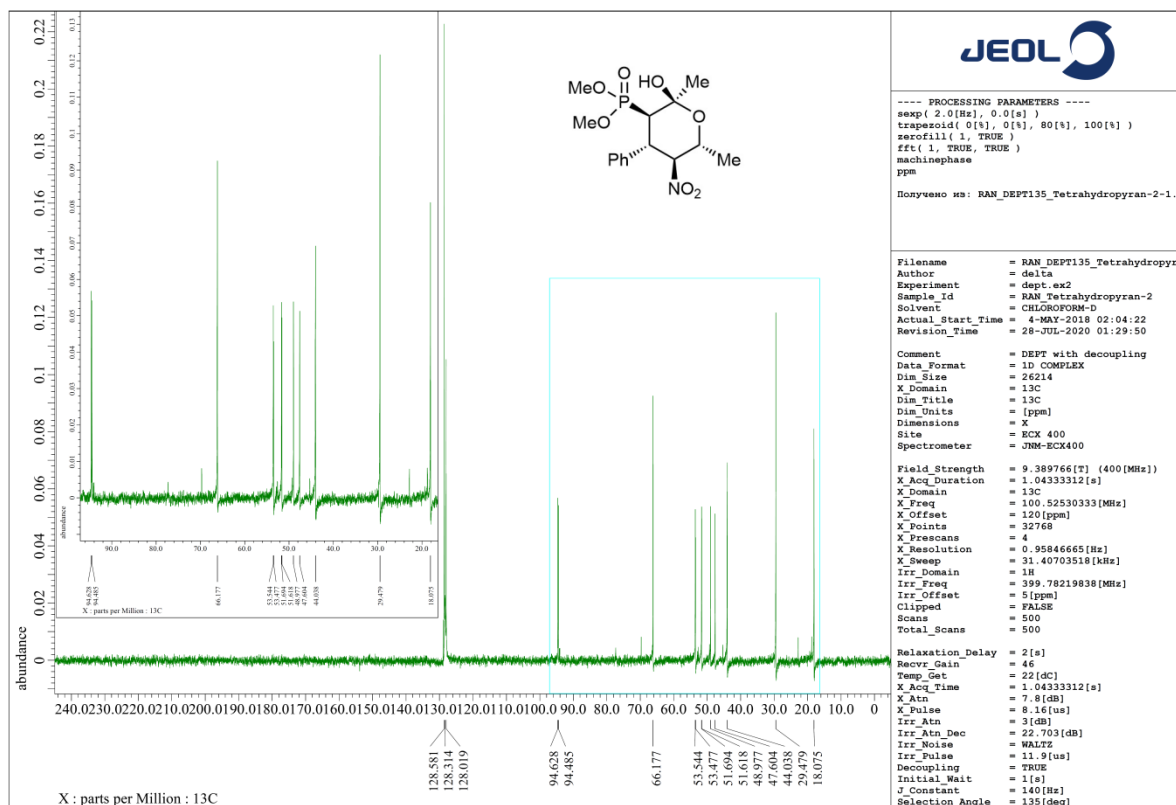

<sup>31</sup>P NMR spectra of dimethyl [(2*S*,3*R*,4*S*,5*S*,6*R*)-2-hydroxy-2,6-dimethyl-5-nitro-4-phenyltetrahydro-2*H*-pyran-3-yl]phosphonate (**13b**) in CDCl<sub>3</sub>

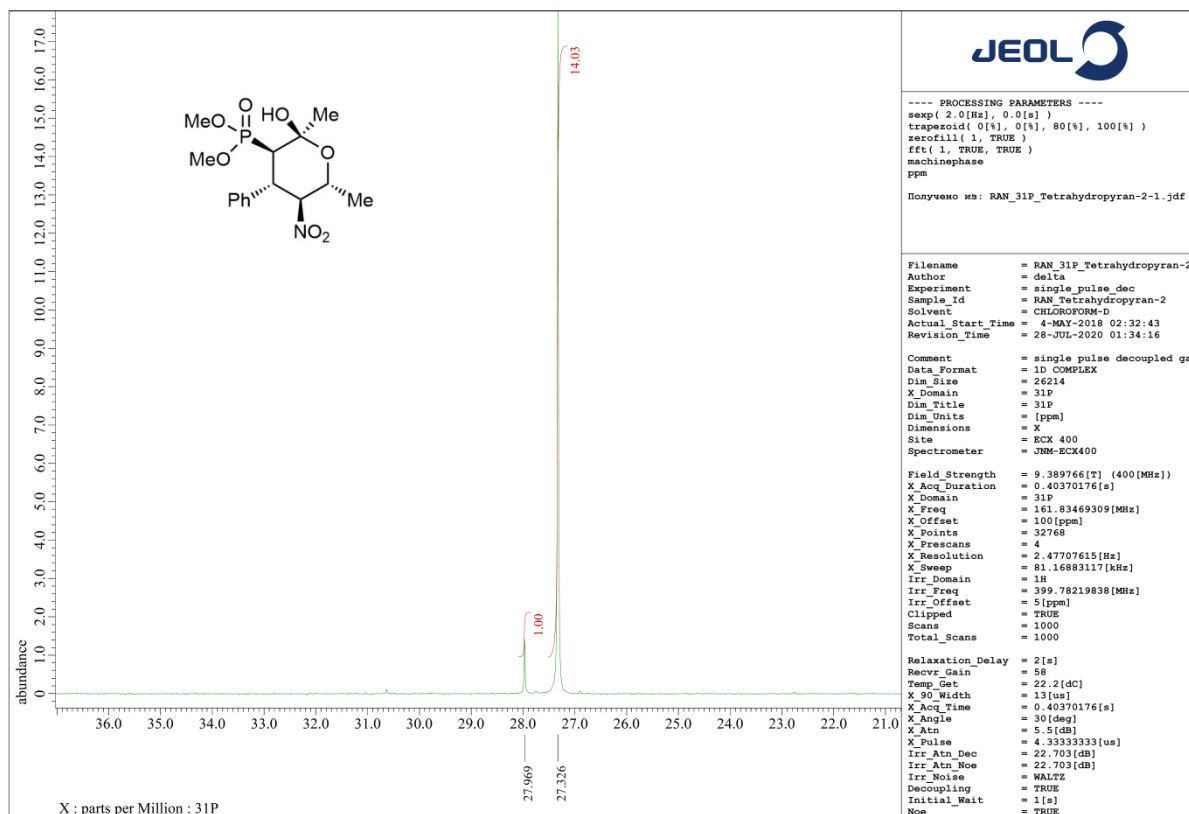



HRMS of dimethyl [(2*S*,3*R*,4*S*,5*S*,6*R*)-2-hydroxy-2,6-dimethyl-5-nitro-4-phenyltetrahydro-2*H*-pyran-3-yl]phosphonate (**13b**)

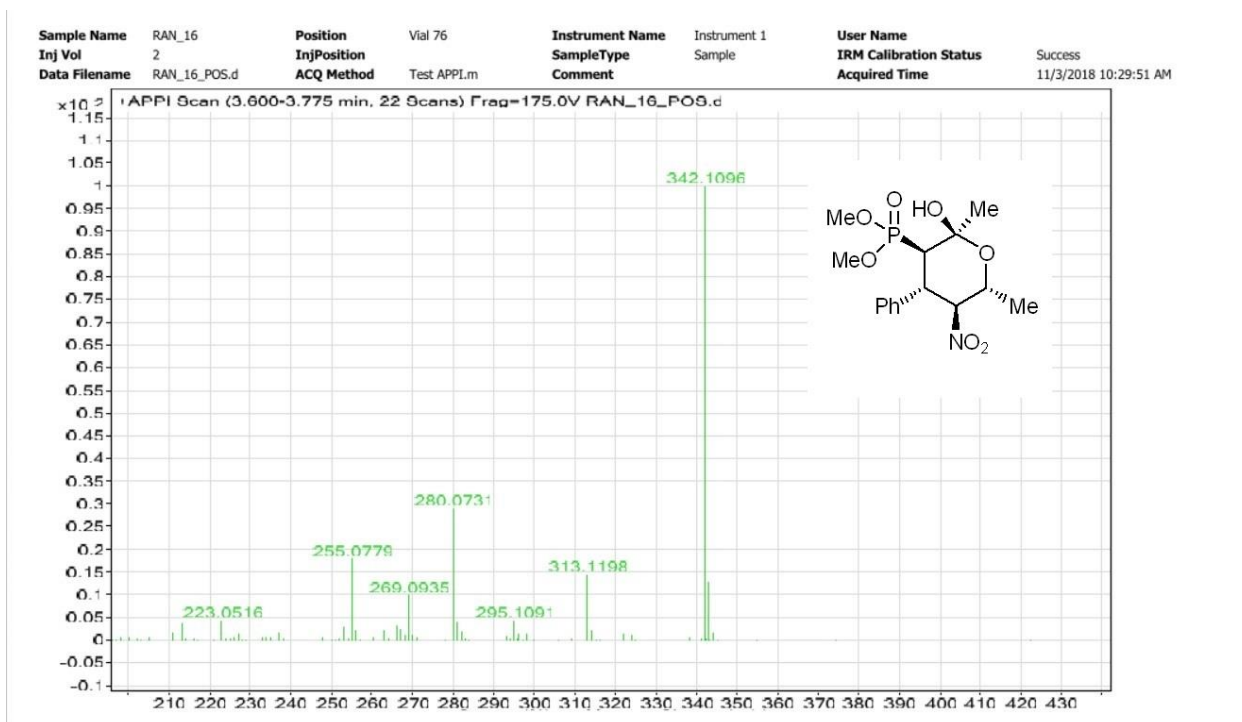

FTIR spectra of dimethyl [(2*S*,3*R*,4*S*,5*S*,6*R*)-2-hydroxy-2-methyl-5-nitro-4-phenyl-6-propyl-tetrahydro-2*H*-pyran-3-yl]phosphonate (**13c**)

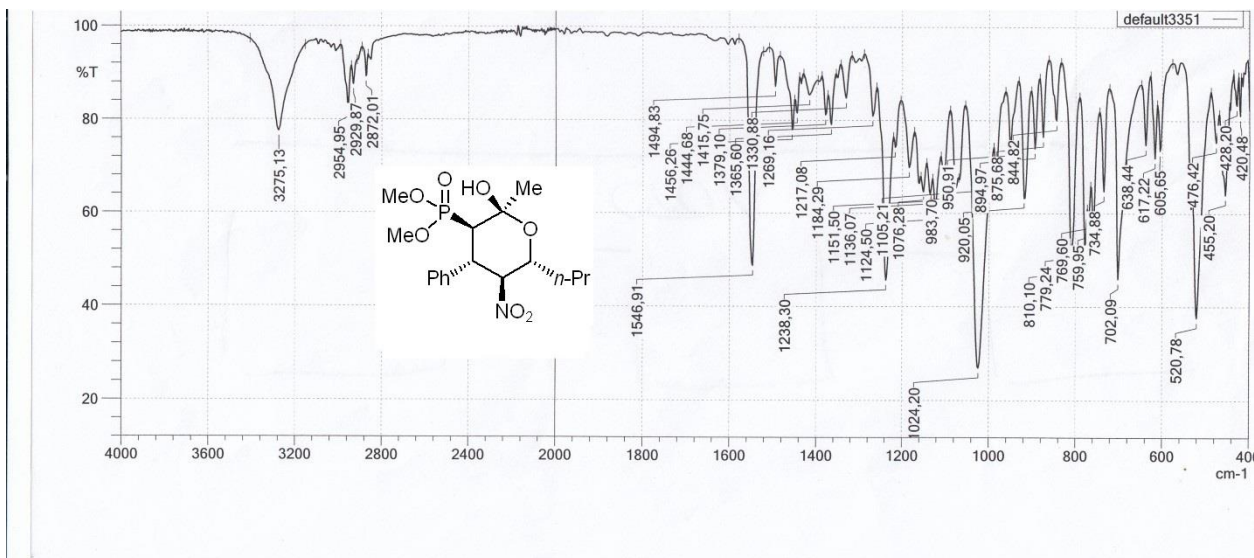



<sup>1</sup>H NMR spectra of dimethyl [(2*S*,3*R*,4*S*,5*S*,6*R*)-2-hydroxy-2-methyl-5-nitro-4-phenyl-6-propyl-tetrahydro-2*H*-pyran-3-yl)phosphonate (**13c**) in CDCl<sub>3</sub>

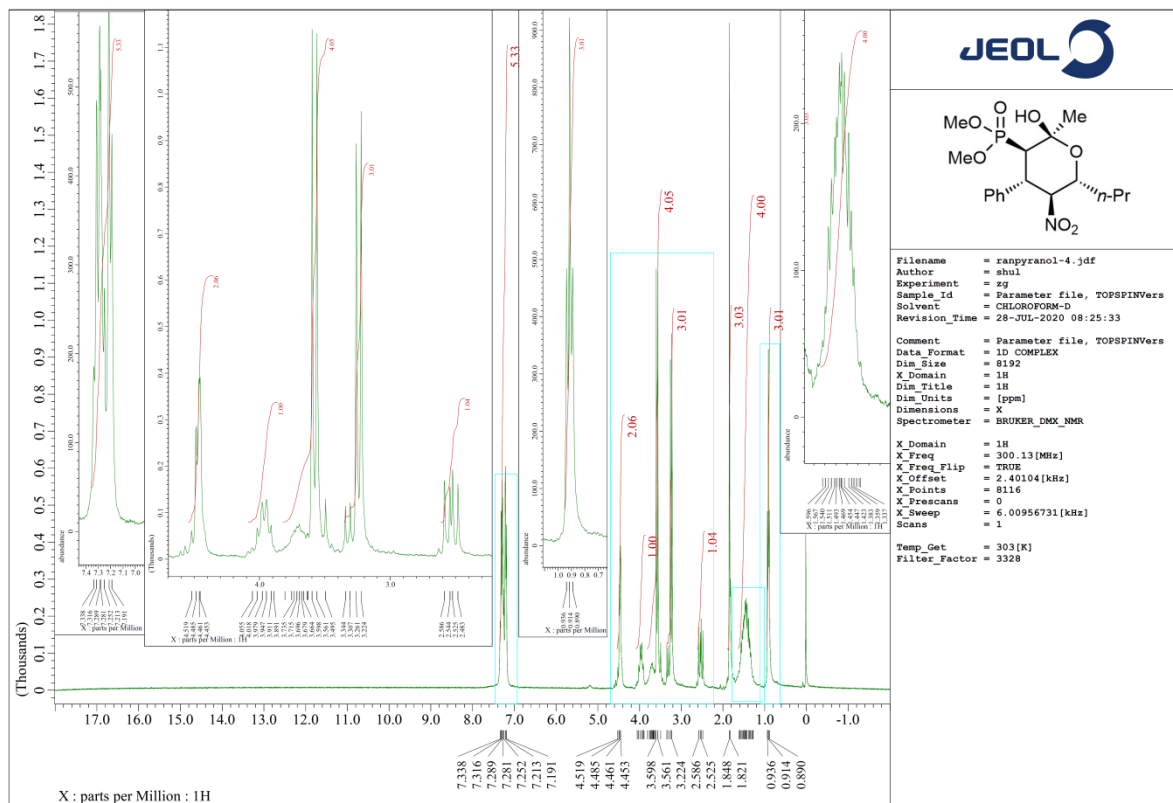

<sup>13</sup>C NMR spectra of dimethyl [(2*S*,3*R*,4*S*,5*S*,6*R*)-2-hydroxy-2-methyl-5-nitro-4-phenyl-6-propyl-tetrahydro-2*H*-pyran-3-yl)phosphonate (**13c**) in CDCl<sub>3</sub>

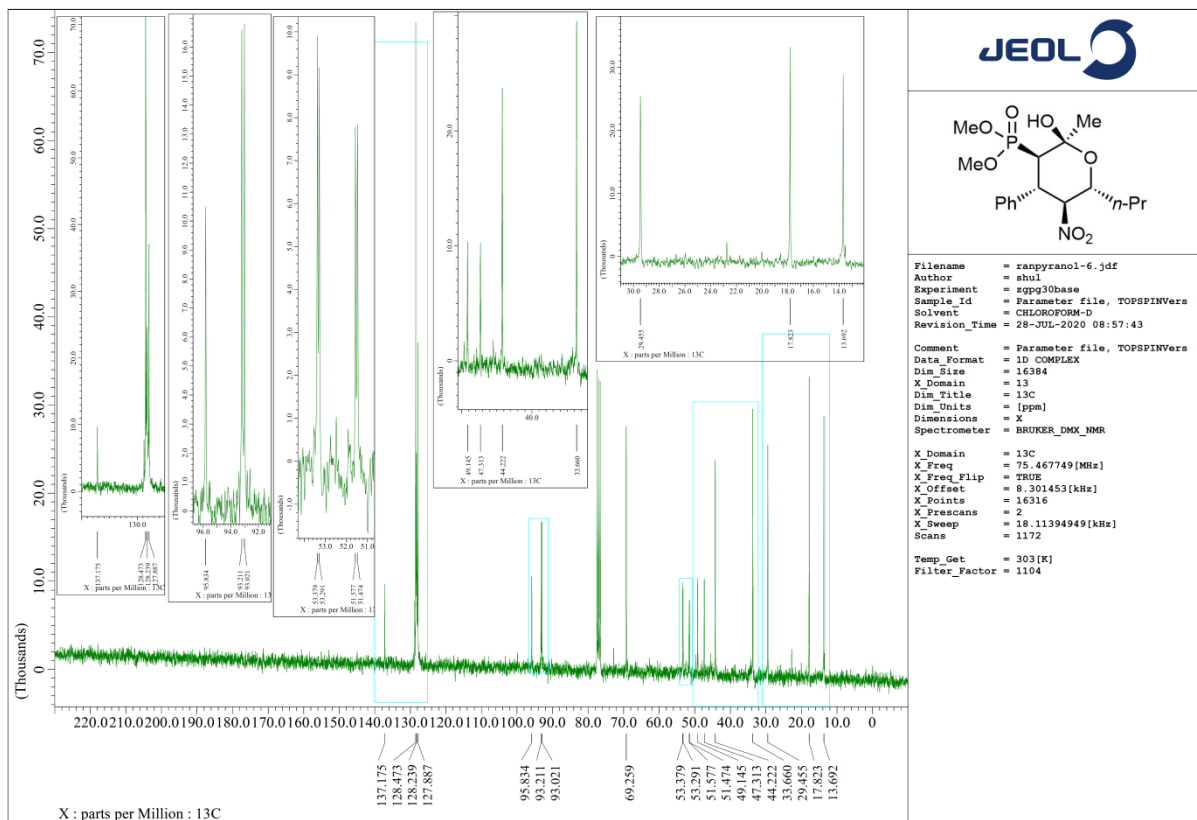



DEPT NMR spectra of dimethyl [(2*S*,3*R*,4*S*,5*S*,6*R*)-2-hydroxy-2-methyl-5-nitro-4-phenyl-6-propyl-tetrahydro-2*H*-pyran-3-yl)phosphonate (**13c**) in CDCl<sub>3</sub>

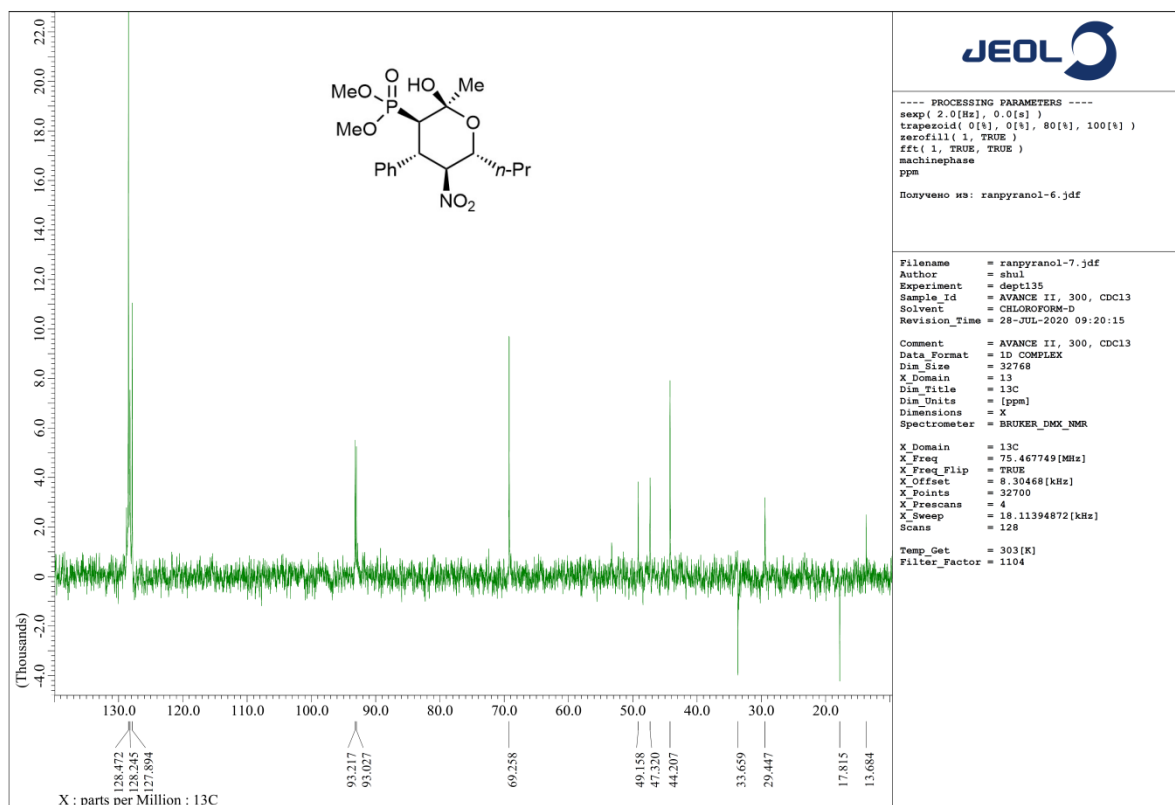

<sup>31</sup>P NMR spectra of dimethyl [(2*S*,3*R*,4*S*,5*S*,6*R*)-2-hydroxy-2-methyl-5-nitro-4-phenyl-6-propyl-tetrahydro-2*H*-pyran-3-yl)phosphonate (**13c**) in CDCl<sub>3</sub>

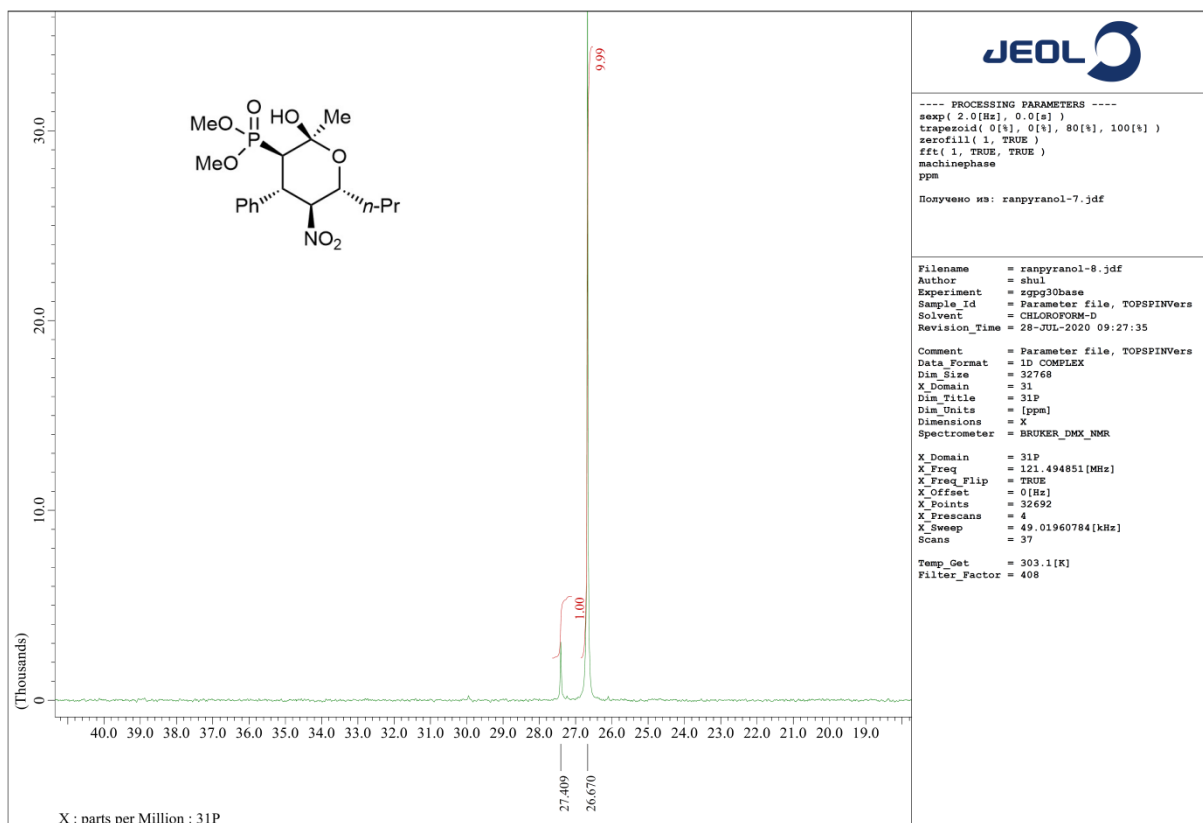



HRMS of dimethyl [(2*S*,3*R*,4*S*,5*S*,6*R*)-2-hydroxy-2-methyl-5-nitro-4-phenyl-6-propyl-tetrahydro-2*H*-pyran-3-yl)phosphonate (**13c**)

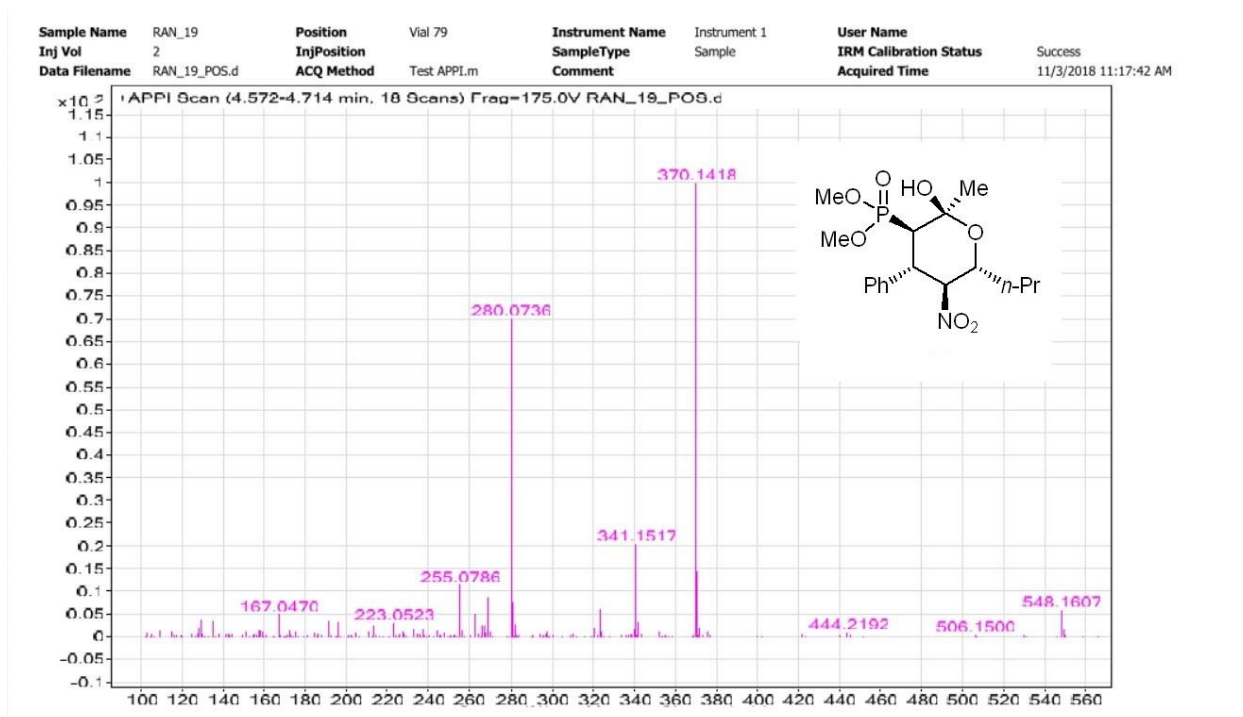

FTIR spectra of dimethyl [(2*S*,3*R*,4*S*,5*S*,6*R*)-2-hydroxy-6-isobutyl-2-methyl-5-nitro-4-phenyl-tetrahydro-2*H*-pyran-3-yl)phosphonate (**13d**)

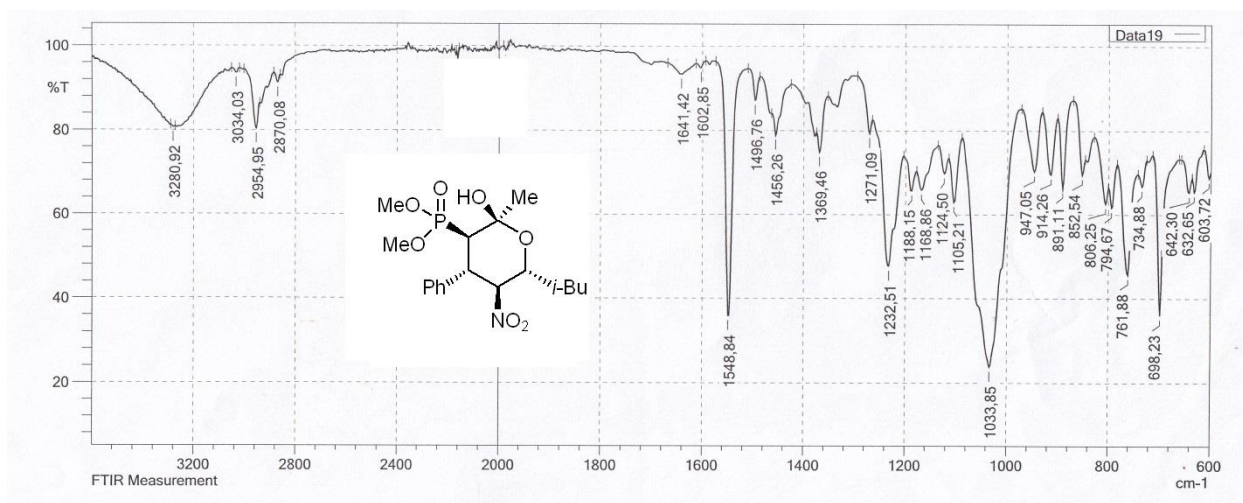



<sup>1</sup>H NMR spectra of dimethyl [(2*S*,3*R*,4*S*,5*S*,6*R*)-2-hydroxy-6-isobutyl-2-methyl-5-nitro-4-phenyl-tetrahydro 2*H*-pyran-3-yl]phosphonate (**13d**) in CDCl<sub>3</sub>

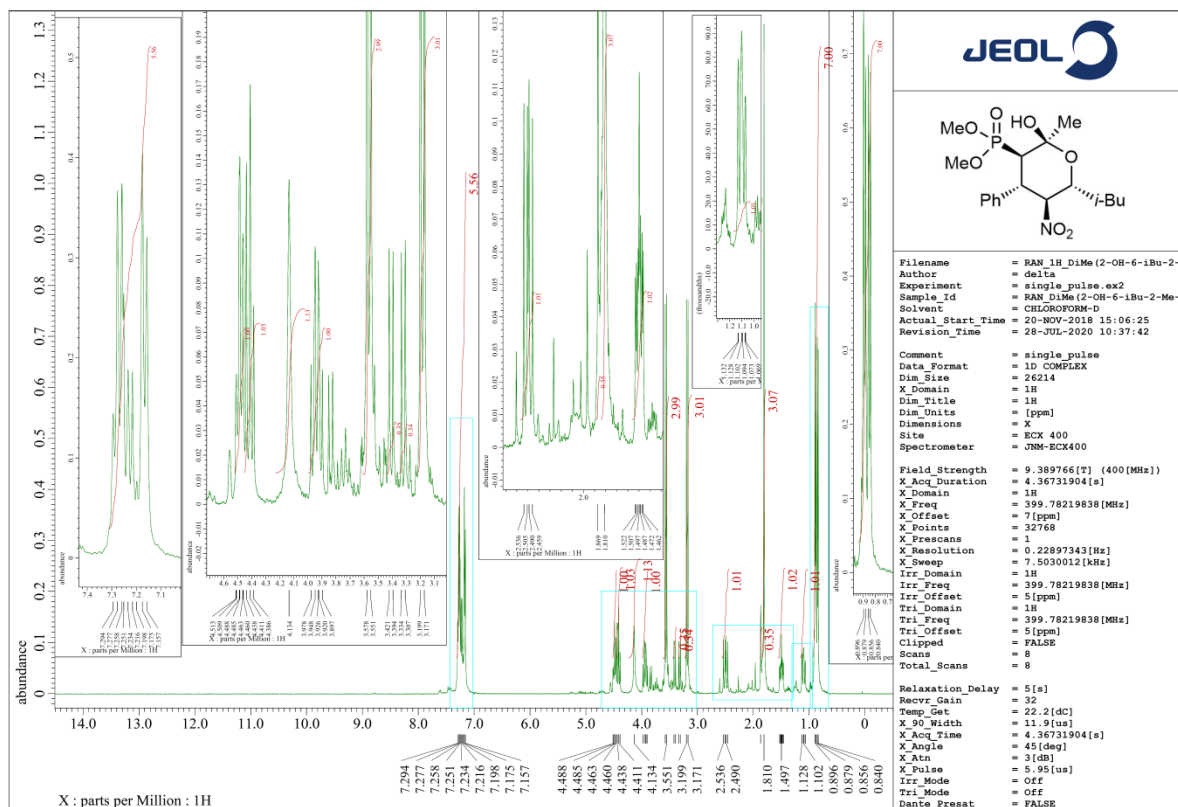

<sup>13</sup>C NMR spectra of dimethyl [(2*S*,3*R*,4*S*,5*S*,6*R*)-2-hydroxy-6-isobutyl-2-methyl-5-nitro-4-phenyl-tetrahydro 2*H*-pyran-3-yl]phosphonate (**13d**) in CDCl<sub>3</sub>

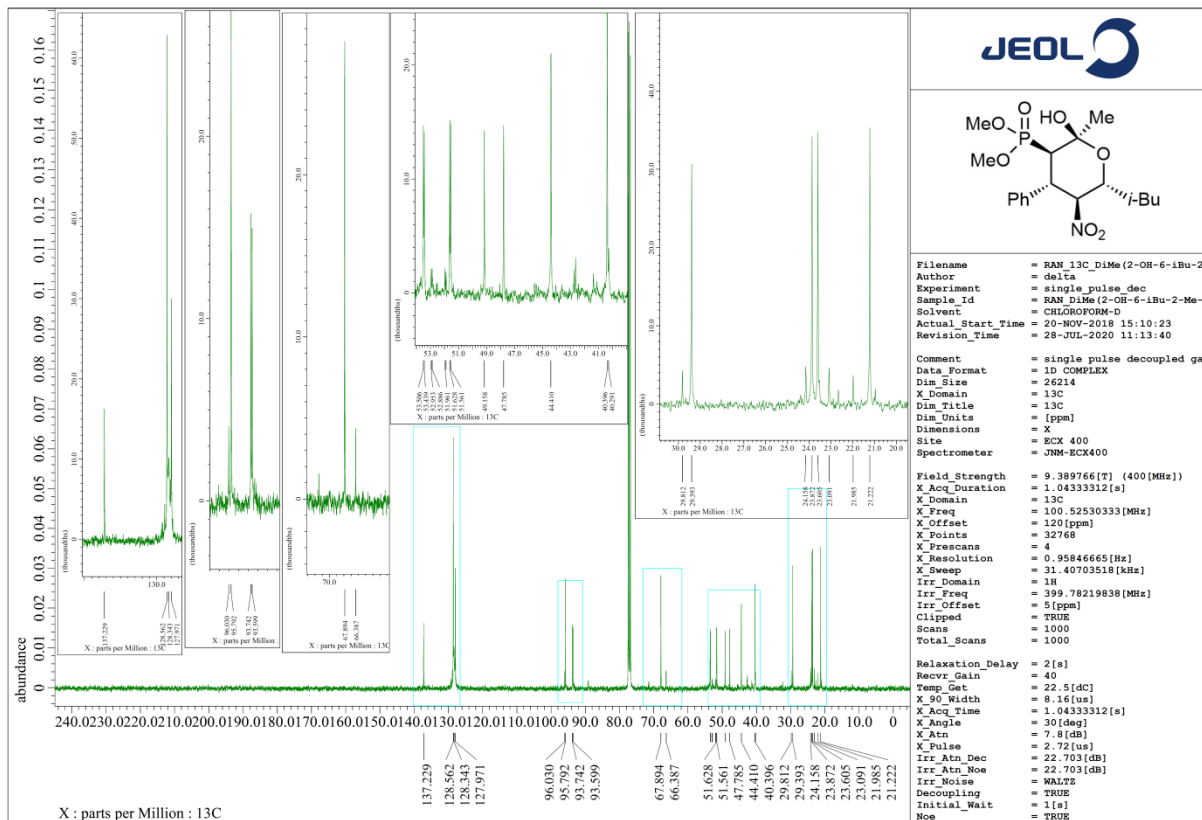



DEPT NMR spectra of dimethyl [(2*S*,3*R*,4*S*,5*S*,6*R*)-2-hydroxy-6-isobutyl-2-methyl-5-nitro-4-phenyl-tetrahydro 2*H*-pyran-3-yl)phosphonate (**13d**) in CDCl<sub>3</sub>

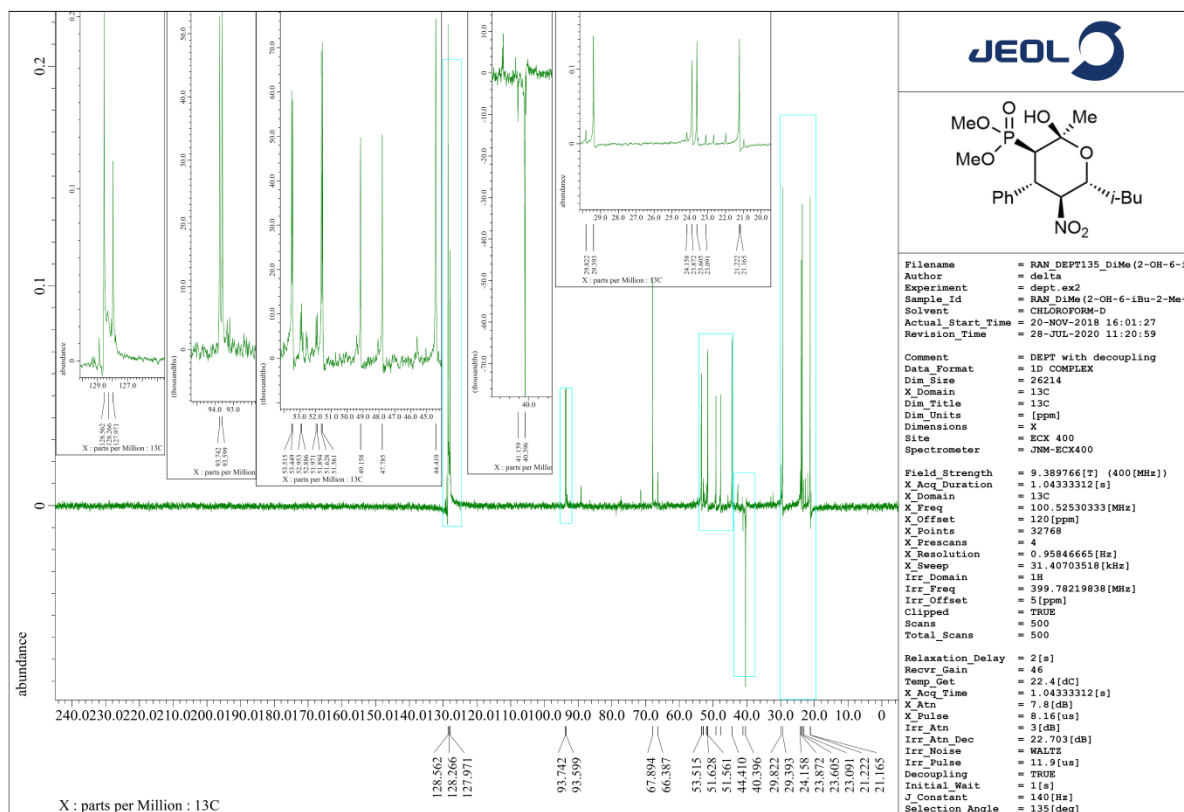

<sup>31</sup>P NMR spectra of dimethyl [(2*S*,3*R*,4*S*,5*S*,6*R*)-2-hydroxy-6-isobutyl-2-methyl-5-nitro-4-phenyl-tetrahydro 2*H*-pyran-3-yl)phosphonate (**13d**) in CDCl<sub>3</sub>

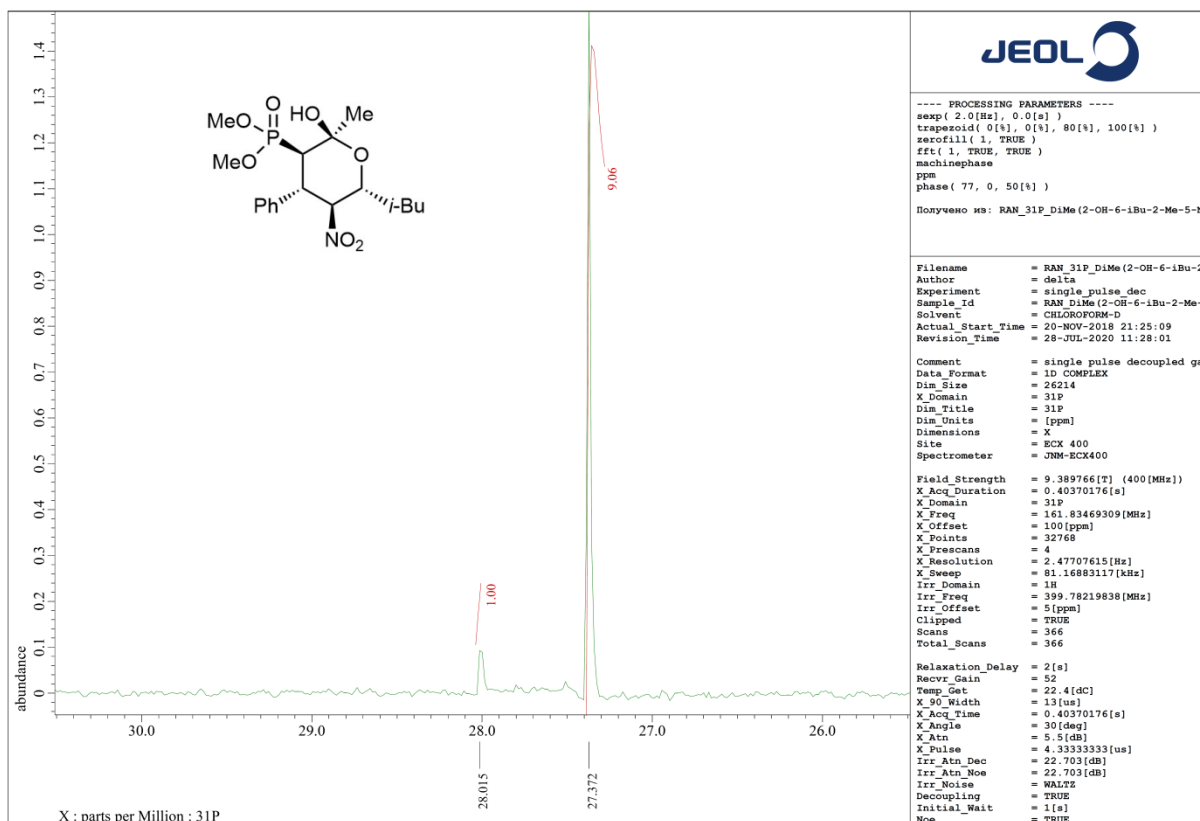



HRMS of dimethyl [(2*S*,3*R*,4*S*,5*S*,6*R*)-2-hydroxy-6-isobutyl-2-methyl-5-nitro-4-phenyl-tetrahydro 2*H*-pyran-3-yl]phosphonate (**13d**)

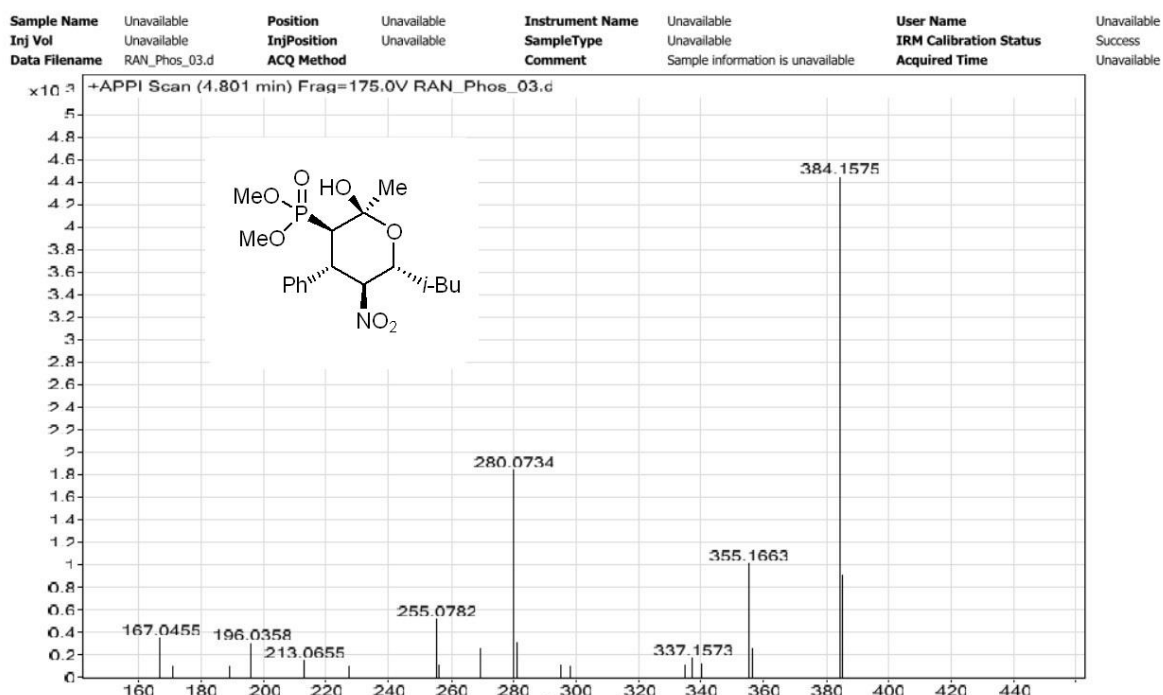

FTIR spectra of dimethyl [(2*S*,3*R*,4*S*,5*S*,6*R*)-2-hydroxy-2-methyl-5-nitro-4,6-diphenyltetrahydro-2*H*-pyran-3-yl]phosphonate (**13e**)

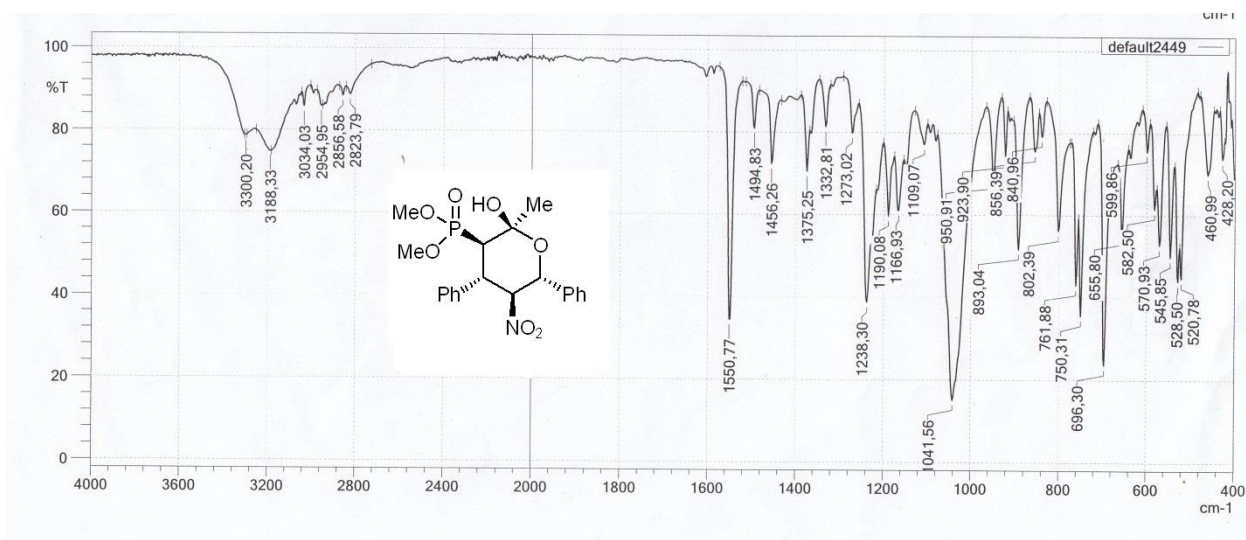



<sup>1</sup>H NMR spectra of dimethyl [(2*S*,3*R*,4*S*,5*S*,6*R*)-2-hydroxy-2-methyl-5-nitro-4,6-diphenyltetrahydro-2*H*-pyran-3-yl]phosphonate (**13e**) in CDCl<sub>3</sub>

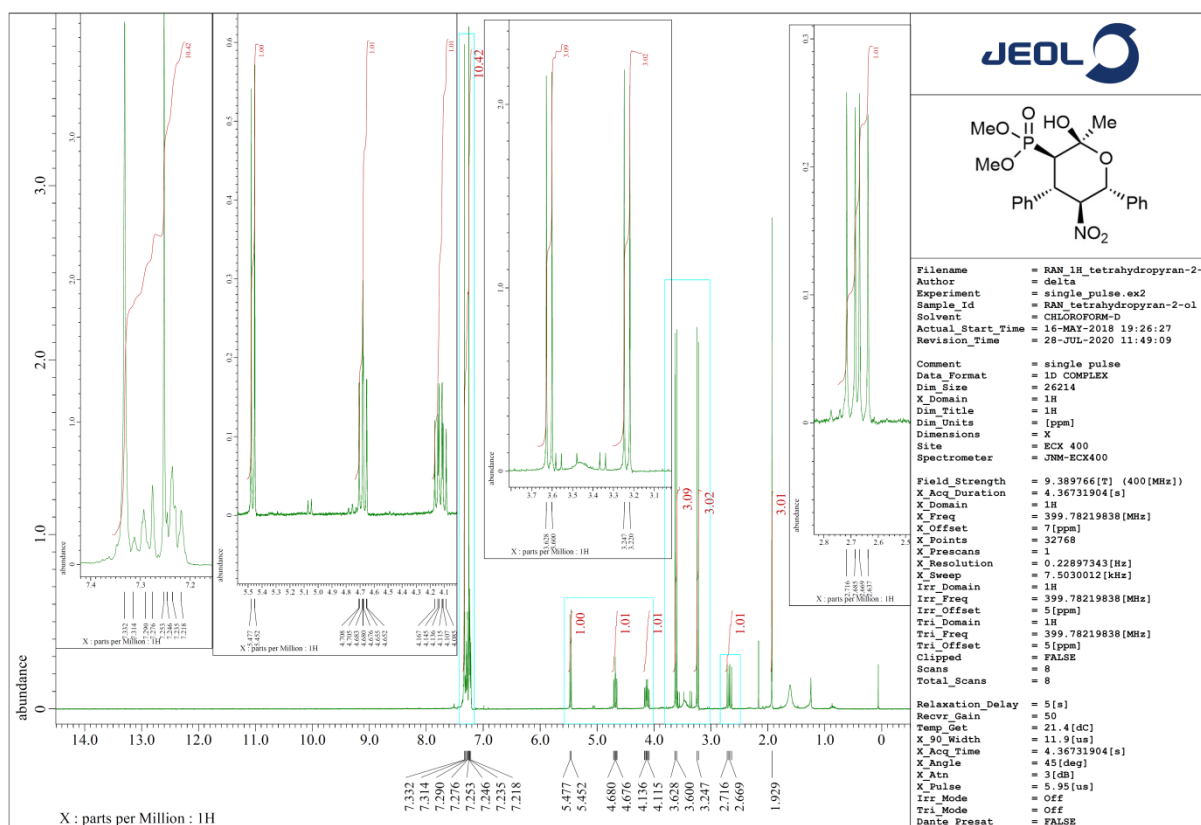

<sup>13</sup>C NMR spectra of dimethyl [(2*S*,3*R*,4*S*,5*S*,6*R*)-2-hydroxy-2-methyl-5-nitro-4,6-diphenyltetrahydro-2*H*-pyran-3-yl]phosphonate (**13e**) in CDCl<sub>3</sub>

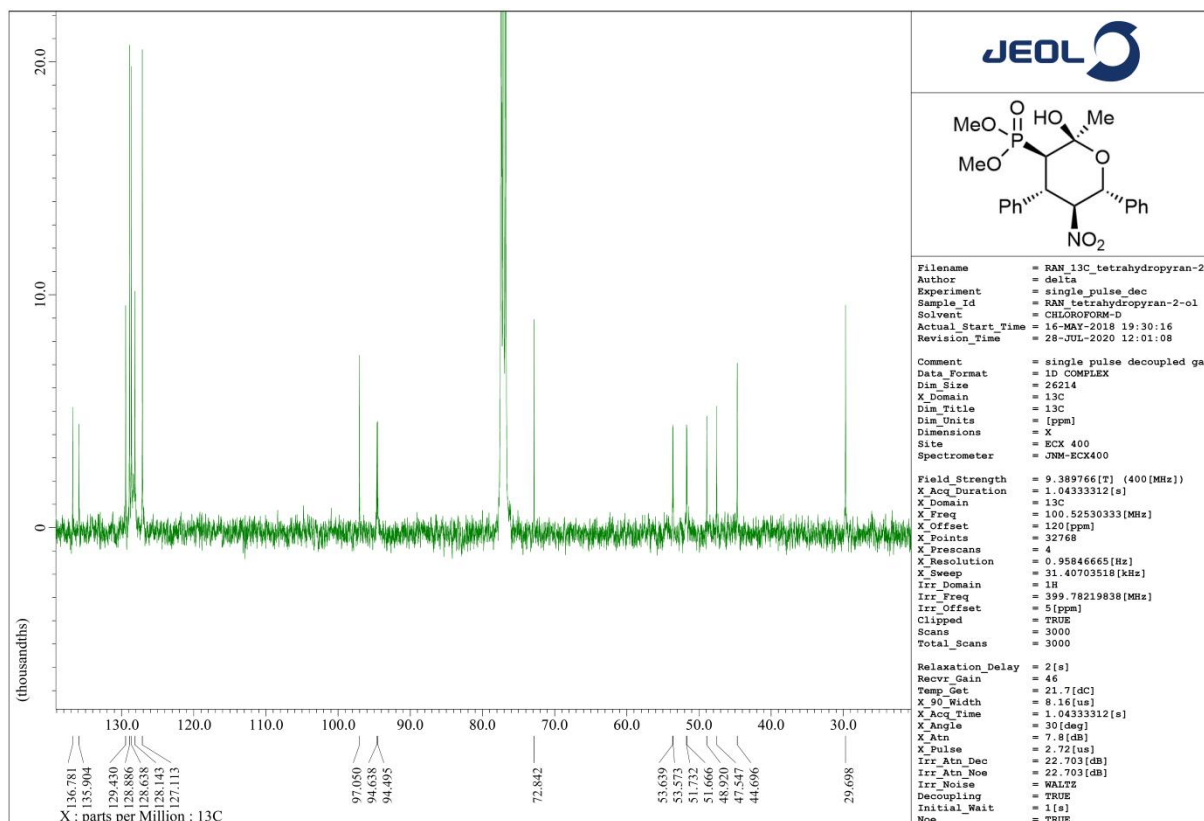



DEPT NMR spectra of dimethyl [(2*S*,3*R*,4*S*,5*S*,6*R*)-2-hydroxy-2-methyl-5-nitro-4,6-diphenyltetrahydro-2*H*-pyran-3-yl]phosphonate (**13e**) in CDCl<sub>3</sub>

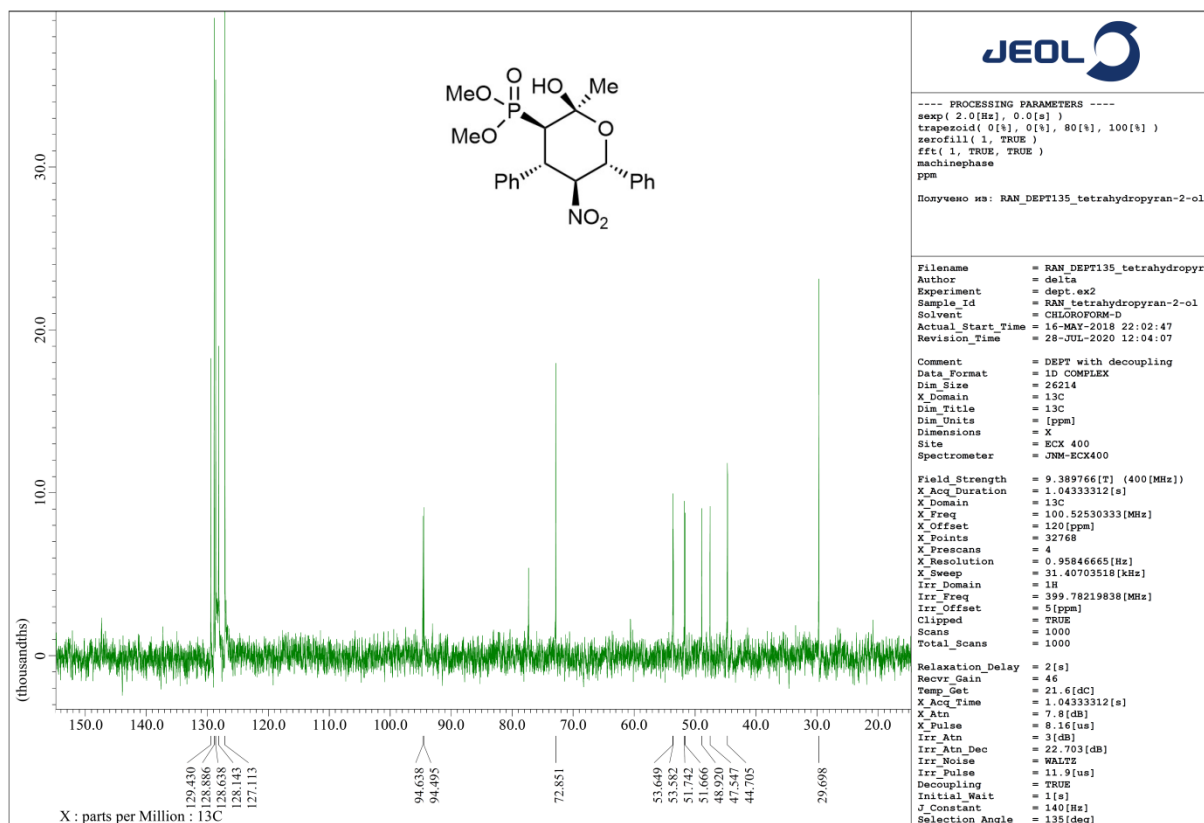

<sup>31</sup>P NMR spectra of dimethyl [(2*S*,3*R*,4*S*,5*S*,6*R*)-2-hydroxy-2-methyl-5-nitro-4,6-diphenyltetrahydro-2*H*-pyran-3-yl]phosphonate (**13e**) in CDCl<sub>3</sub>

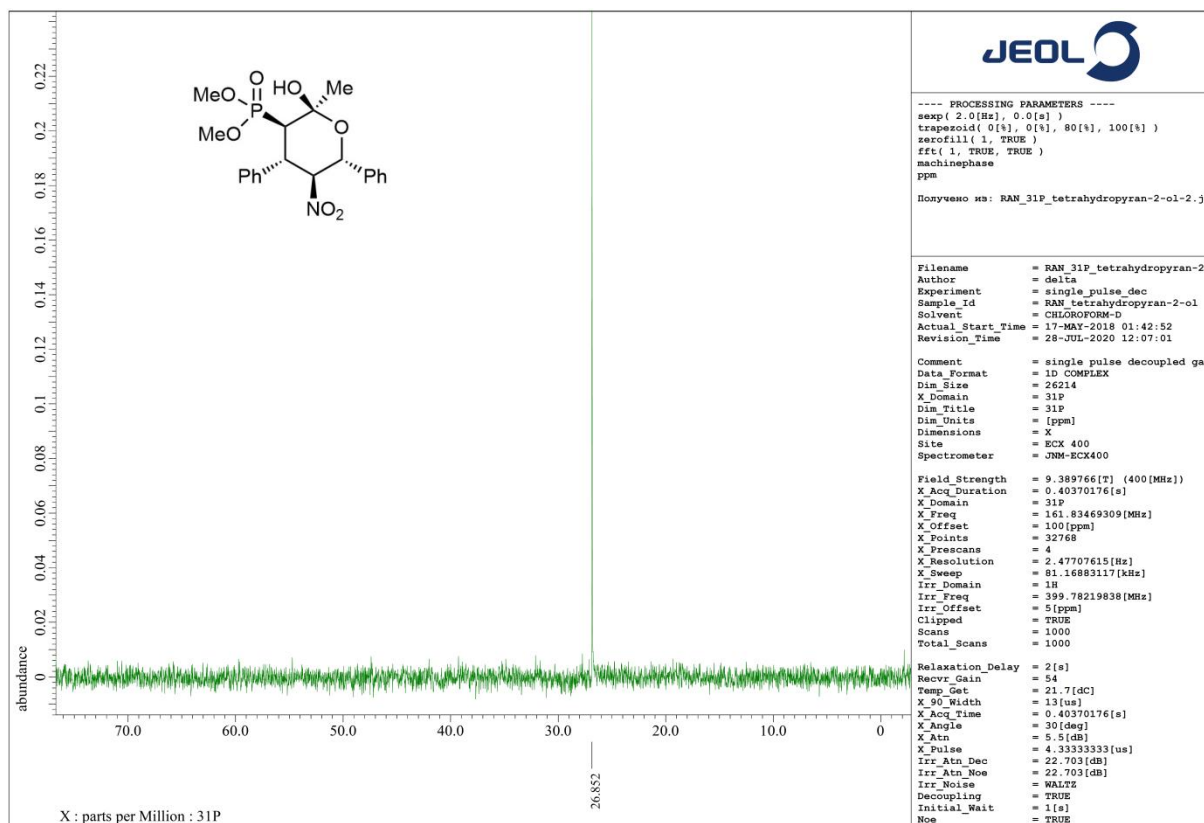



HRMS of dimethyl [(2*S*,3*R*,4*S*,5*S*,6*R*)-2-hydroxy-2-methyl-5-nitro-4,6-diphenyltetrahydro-2*H*-pyran-3-yl]phosphonate (**13e**)

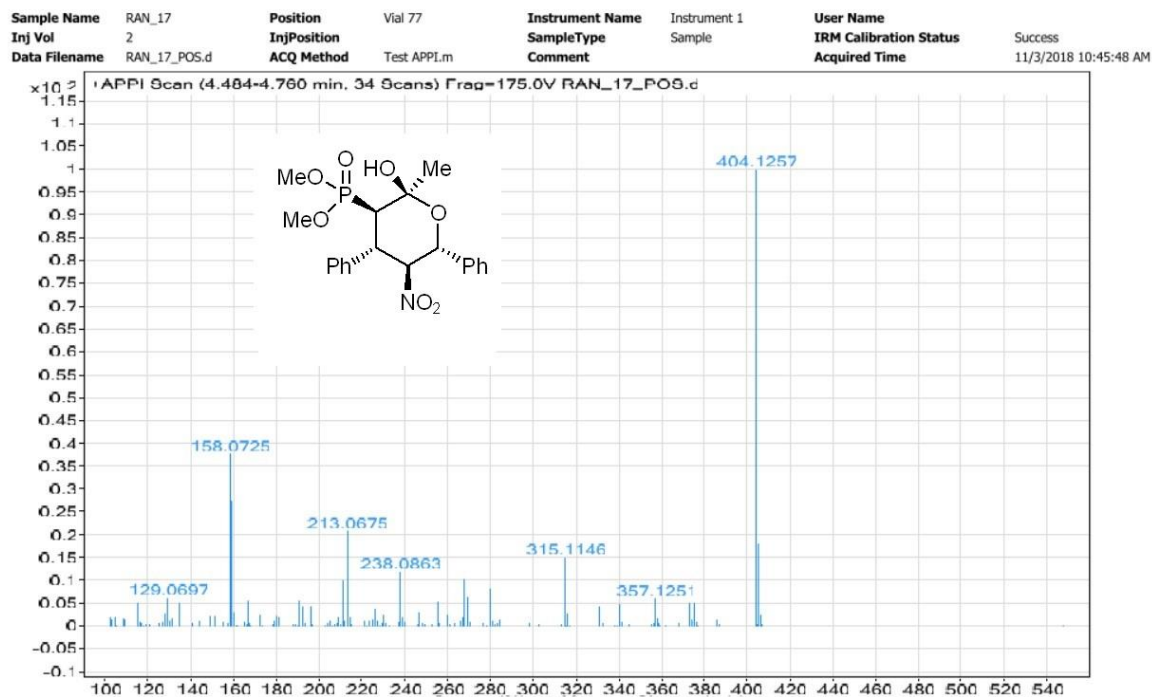

FTIR spectra of dimethyl [(2*S*,3*R*,4*S*,5*S*,6*R*)-6-(4-chlorophenyl)-2-hydroxy-2-methyl-5-nitro-4-phenyltetrahydro-2*H*-pyran-3-yl]phosphonate (**13f**)

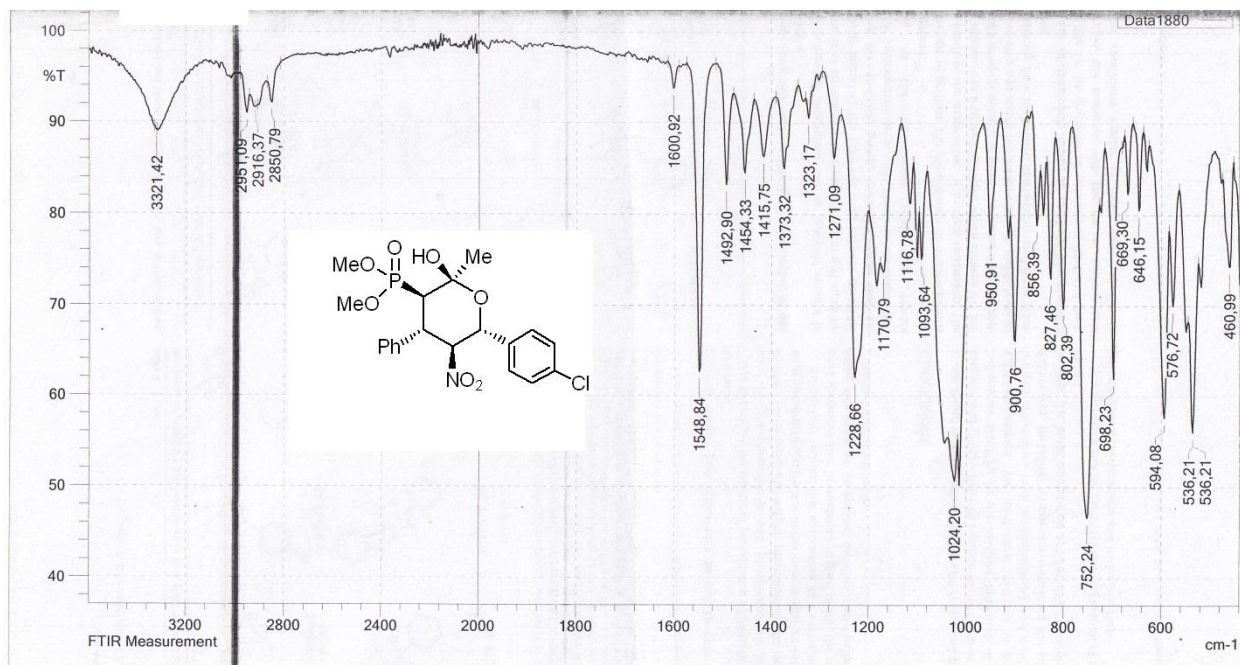



<sup>1</sup>H NMR spectra of dimethyl [(2*S*,3*R*,4*S*,5*S*,6*R*)-6-(4-chlorophenyl)-2-hydroxy-2-methyl-5-nitro-4-phenyltetrahydro-2*H*-pyran-3-yl]phosphonate (**13f**) in CDCl<sub>3</sub>

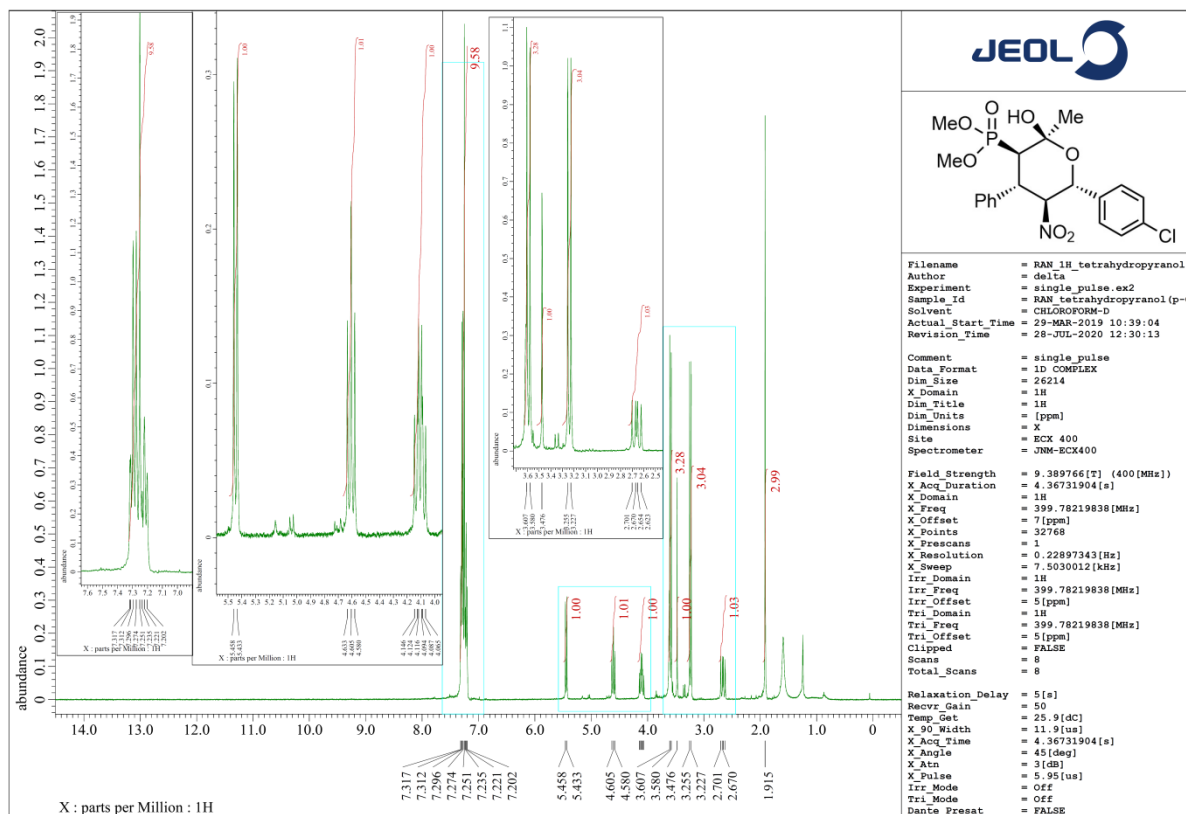

<sup>13</sup>C NMR spectra of dimethyl [(2*S*,3*R*,4*S*,5*S*,6*R*)-6-(4-chlorophenyl)-2-hydroxy-2-methyl-5-nitro-4-phenyltetrahydro-2*H*-pyran-3-yl]phosphonate (**13f**) in CDCl<sub>3</sub>

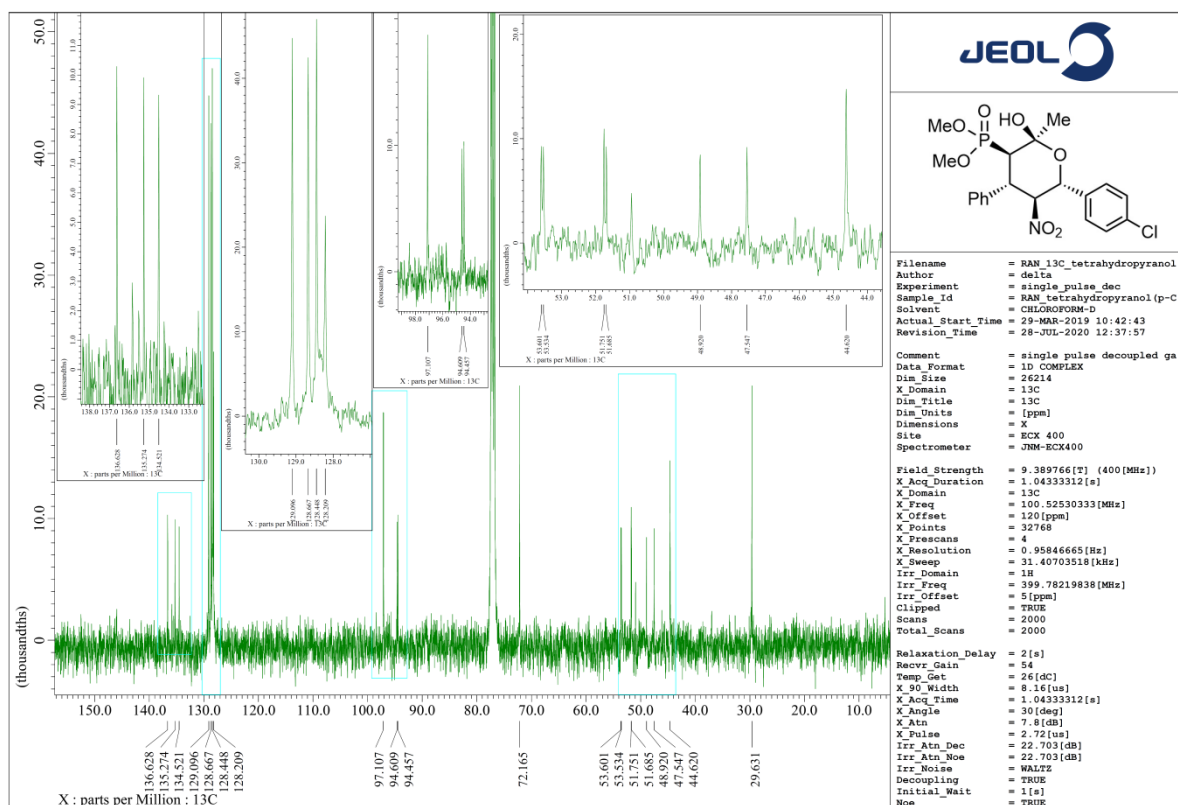



DEPT NMR spectra of dimethyl [(2*S*,3*R*,4*S*,5*S*,6*R*)-6-(4-chlorophenyl)-2-hydroxy-2-methyl-5-nitro-4-phenyltetrahydro-2*H*-pyran-3-yl]phosphonate (**13f**) in CDCl<sub>3</sub>

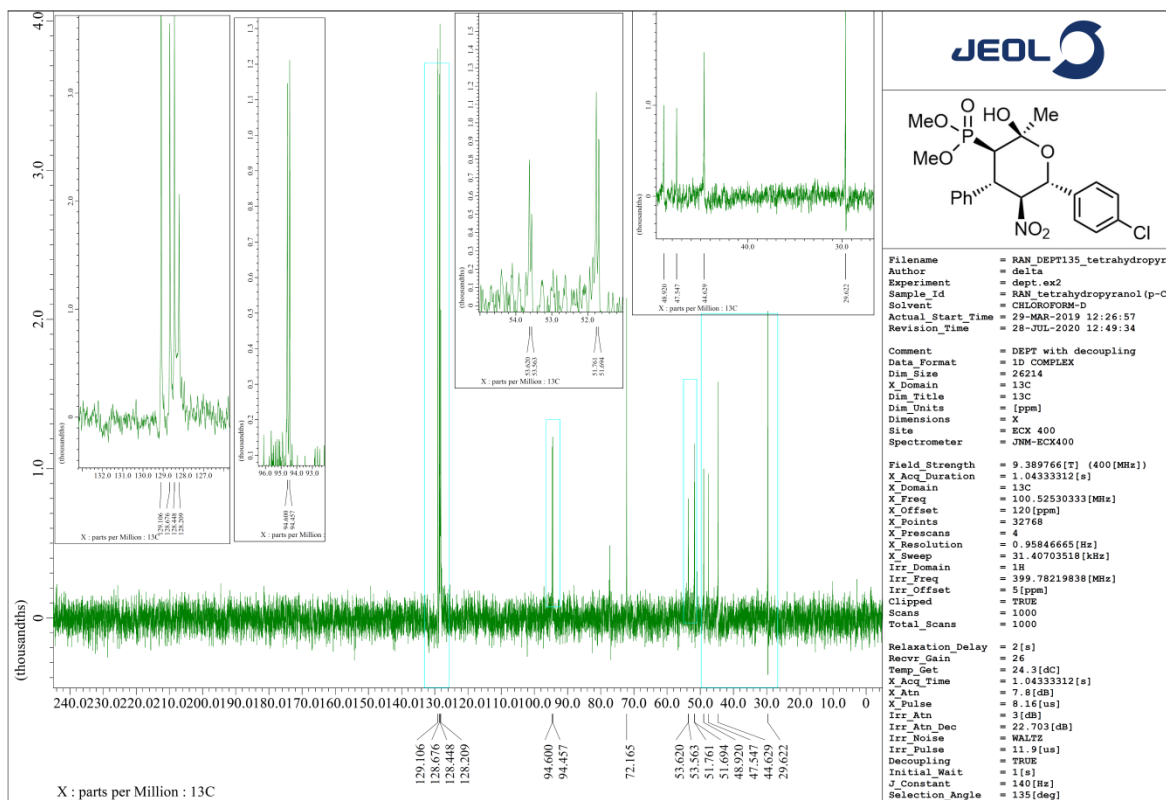

<sup>31</sup>P NMR spectra of dimethyl [(2*S*,3*R*,4*S*,5*S*,6*R*)-6-(4-chlorophenyl)-2-hydroxy-2-methyl-5-nitro-4-phenyltetrahydro-2*H*-pyran-3-yl]phosphonate (**13f**) in CDCl<sub>3</sub>

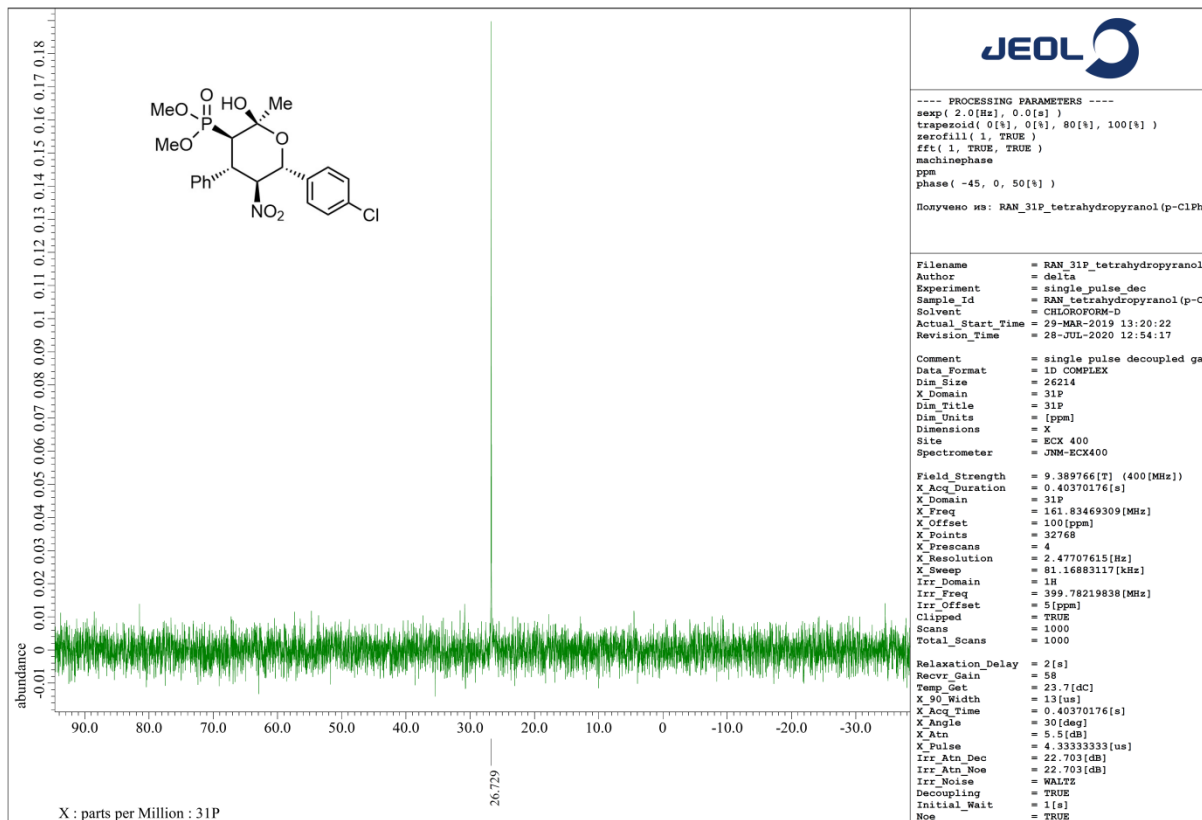



HRMS of dimethyl [(2*S*,3*R*,4*S*,5*S*,6*R*)-6-(4-chlorophenyl)-2-hydroxy-2-methyl-5-nitro-4-phenyltetrahydro-2*H*-pyran-3-yl]phosphonate (**13f**)

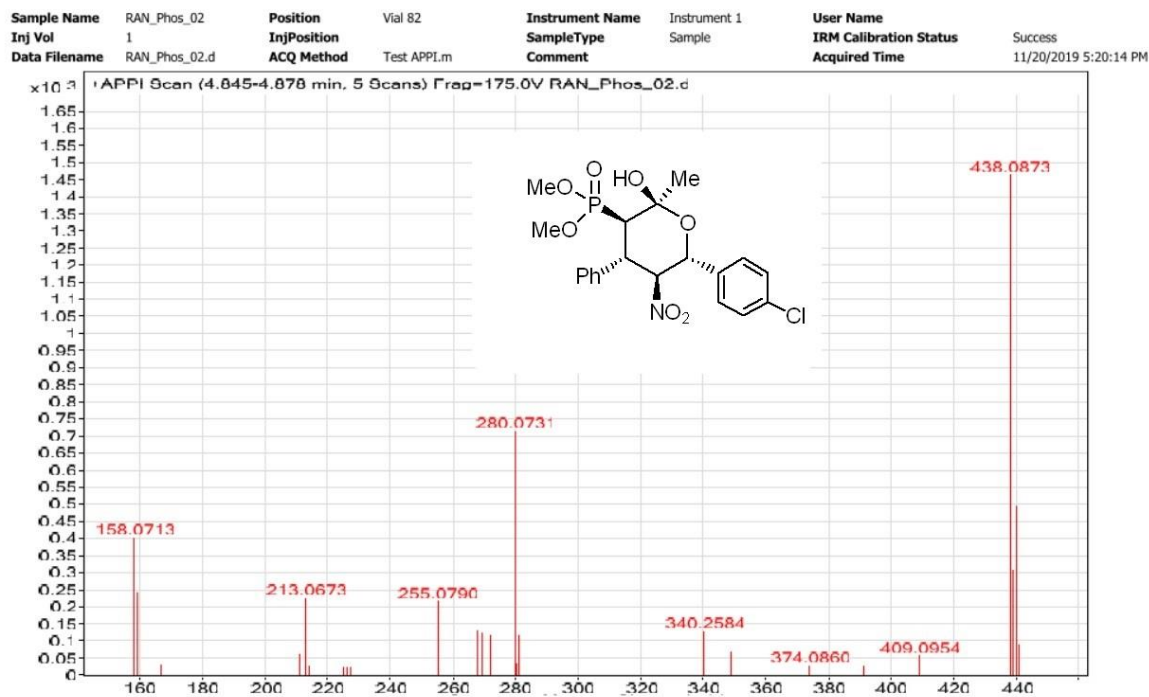

FTIR spectra of dimethyl [(2*R*,3*S*,4*S*)-2,6-dimethyl-3-nitro-4-phenyl-3,4-dihydro-2*H*-pyran-5-yl]phosphonate (**14**)

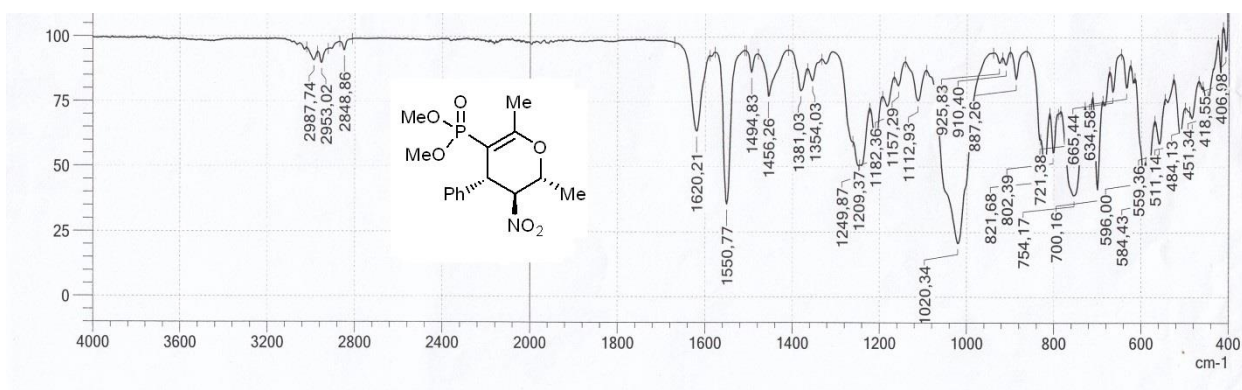



<sup>1</sup>H NMR spectra of dimethyl [(2*R*,3*S*,4*S*)-2,6-dimethyl-3-nitro-4-phenyl-3,4-dihydro-2*H*-pyran-5-yl]phosphonate (**14**) in CDCl<sub>3</sub>

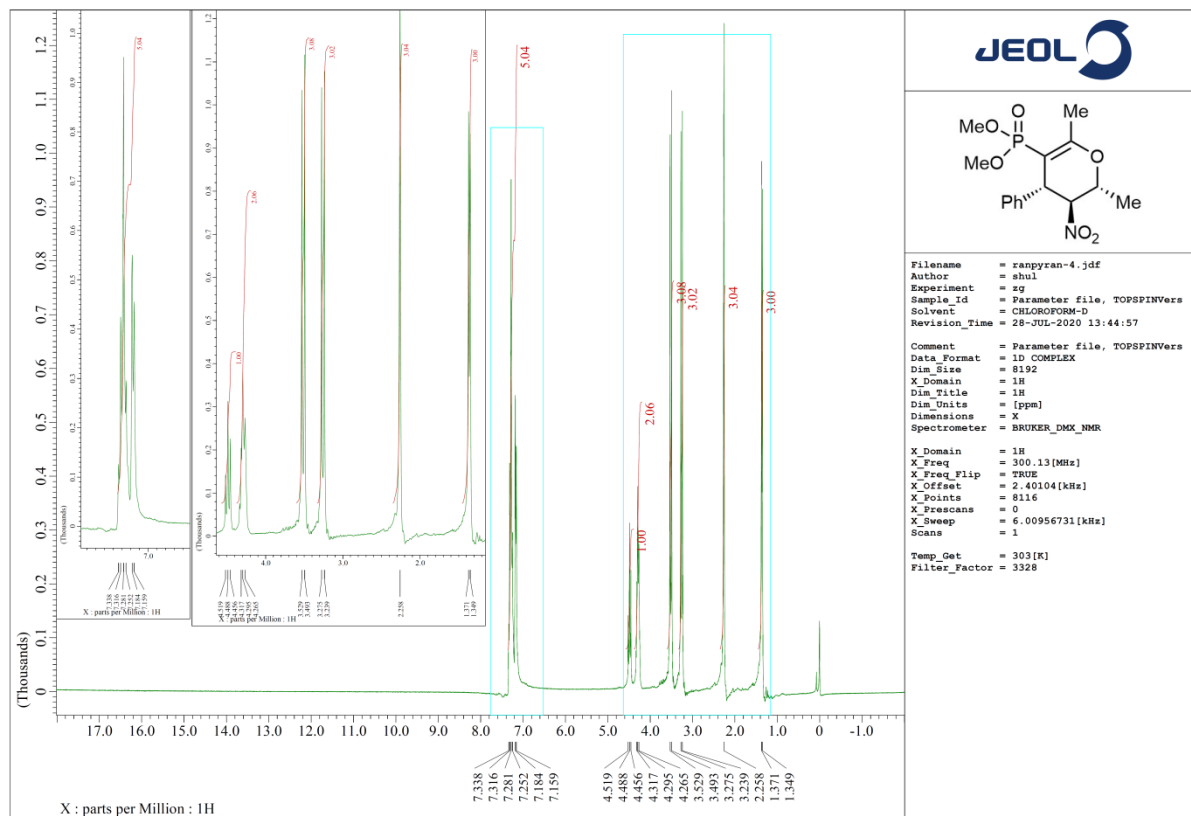

<sup>13</sup>C NMR spectra of dimethyl [(2*R*,3*S*,4*S*)-2,6-dimethyl-3-nitro-4-phenyl-3,4-dihydro-2*H*-pyran-5-yl]phosphonate (**14**) in CDCl<sub>3</sub>

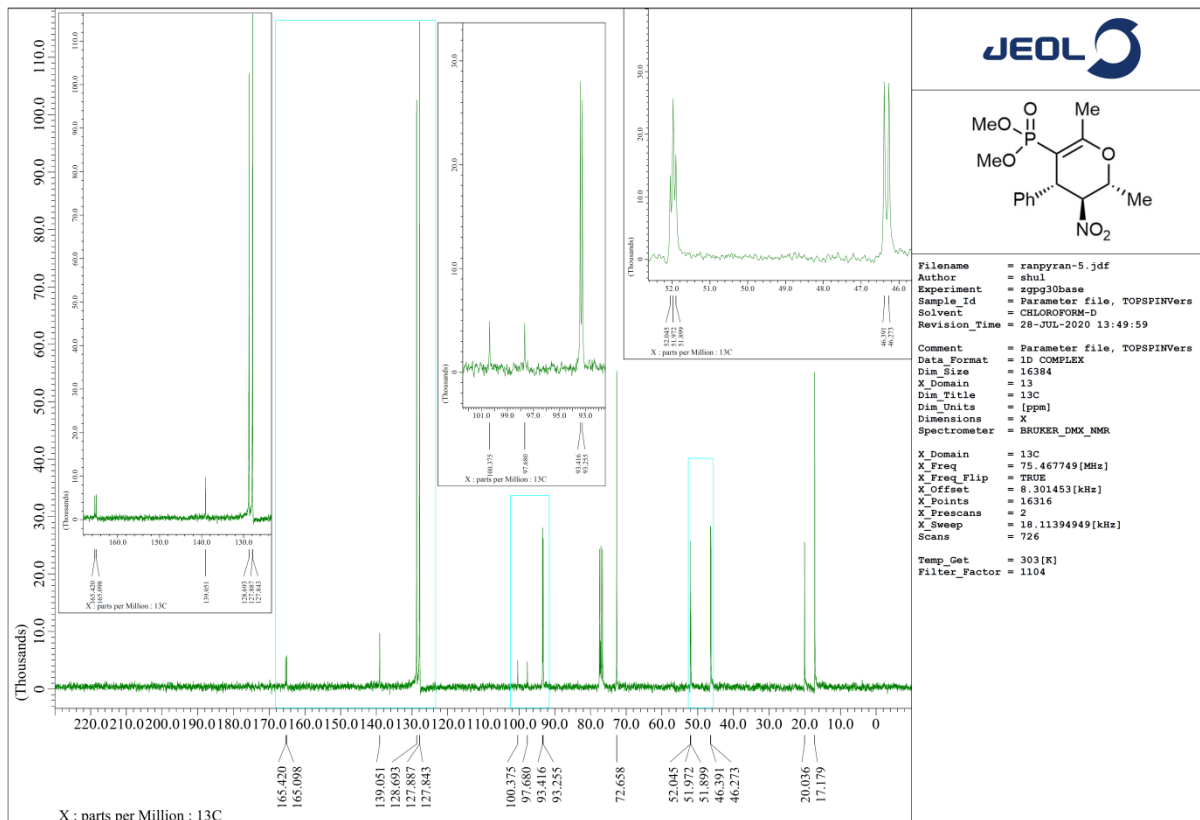



DEPT NMR spectra of dimethyl [(2*R*,3*S*,4*S*)-2,6-dimethyl-3-nitro-4-phenyl-3,4-dihydro-2*H*-pyran-5-yl]phosphonate (**14**) in CDCl<sub>3</sub>

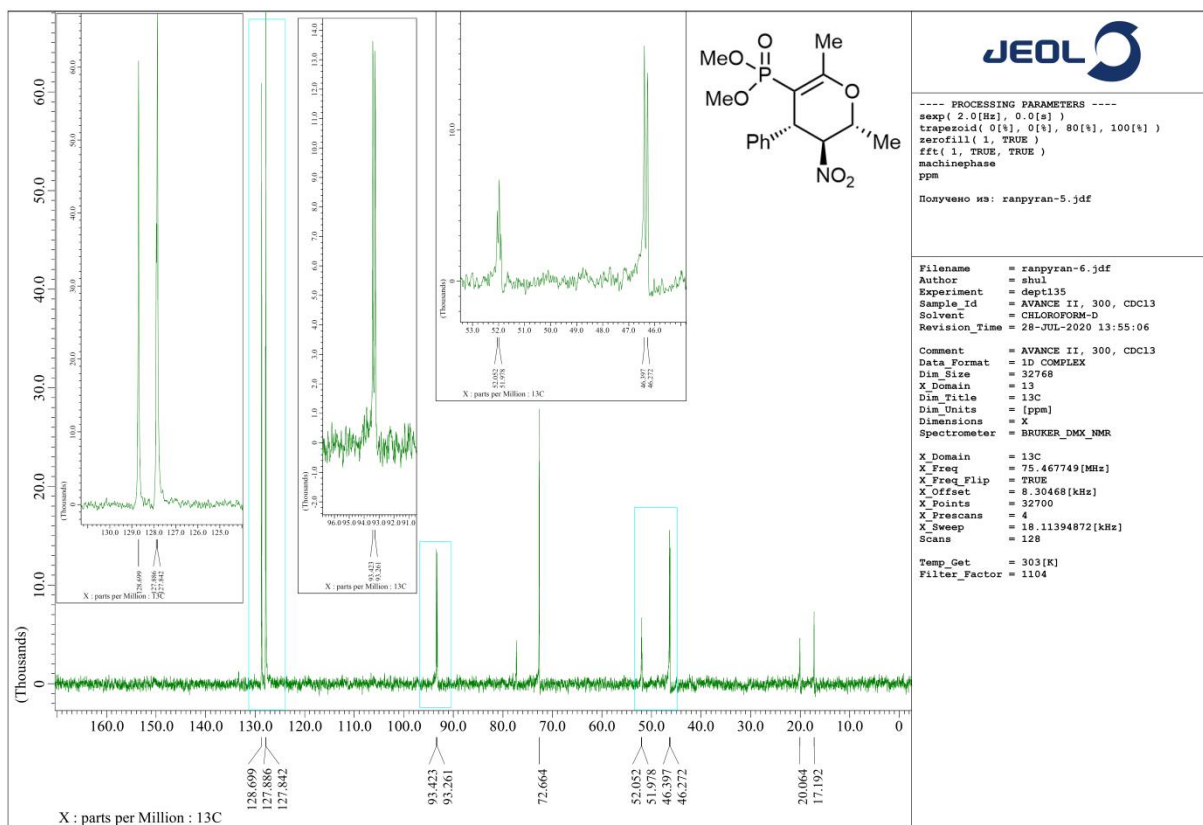

<sup>31</sup>P NMR spectra of dimethyl [(2*R*,3*S*,4*S*)-2,6-dimethyl-3-nitro-4-phenyl-3,4-dihydro-2*H*-pyran-5-yl]phosphonate (**14**) in CDCl<sub>3</sub>

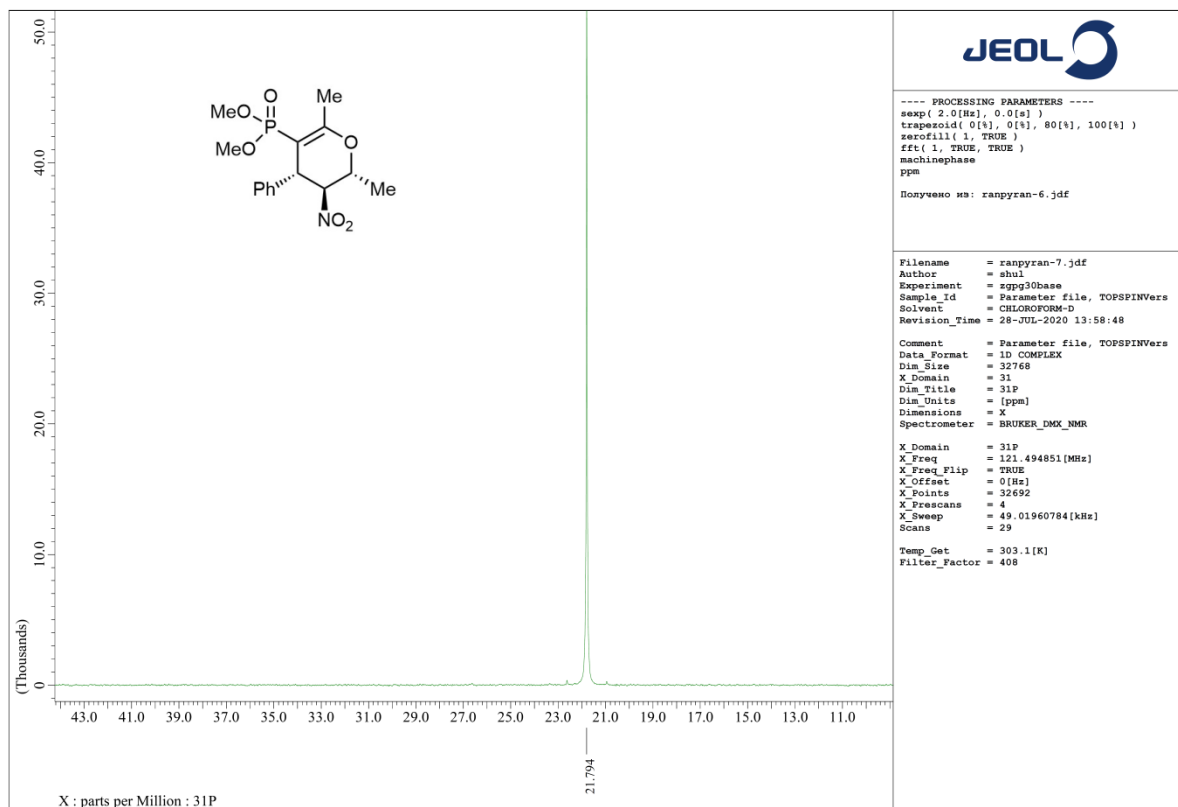



HRMS of dimethyl [(2*R*,3*S*,4*S*)-2,6-dimethyl-3-nitro-4-phenyl-3,4-dihydro-2*H*-pyran-5-yl]phosphonate (**14**)

| Sample Name   | Unavailable   | Position    | Unavailable | Instrument Name | Unavailable                       | User Name              | Unavailable |
|---------------|---------------|-------------|-------------|-----------------|-----------------------------------|------------------------|-------------|
| Inj Vol       | Unavailable   | InjPosition | Unavailable | SampleType      | Unavailable                       | IRM Calibration Status | Success     |
| Data Filename | RAN_Phos_10.d | ACQ Method  |             | Comment         | Sample information is unavailable | Acquired Time          | Unavailable |

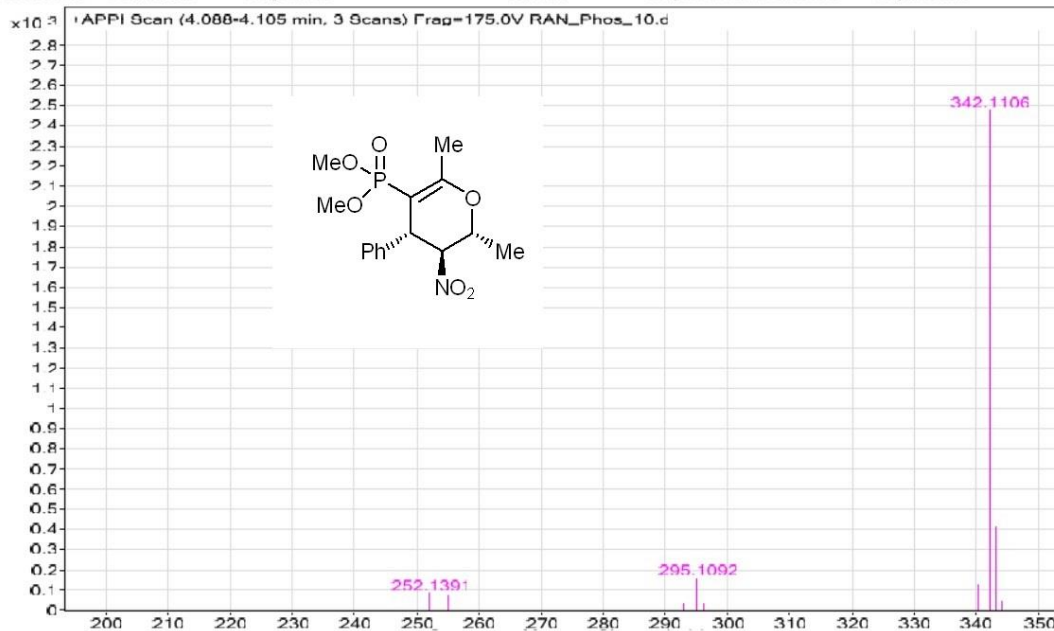



## 9. Copies of HPLC chromatograms for compounds 6a–d,f and 13b

HPLC for dimethyl [(2*R*,3*S*)-4-nitro-1-oxo-1,3-diphenylbutan-2-yl]phosphonate (**6a**)

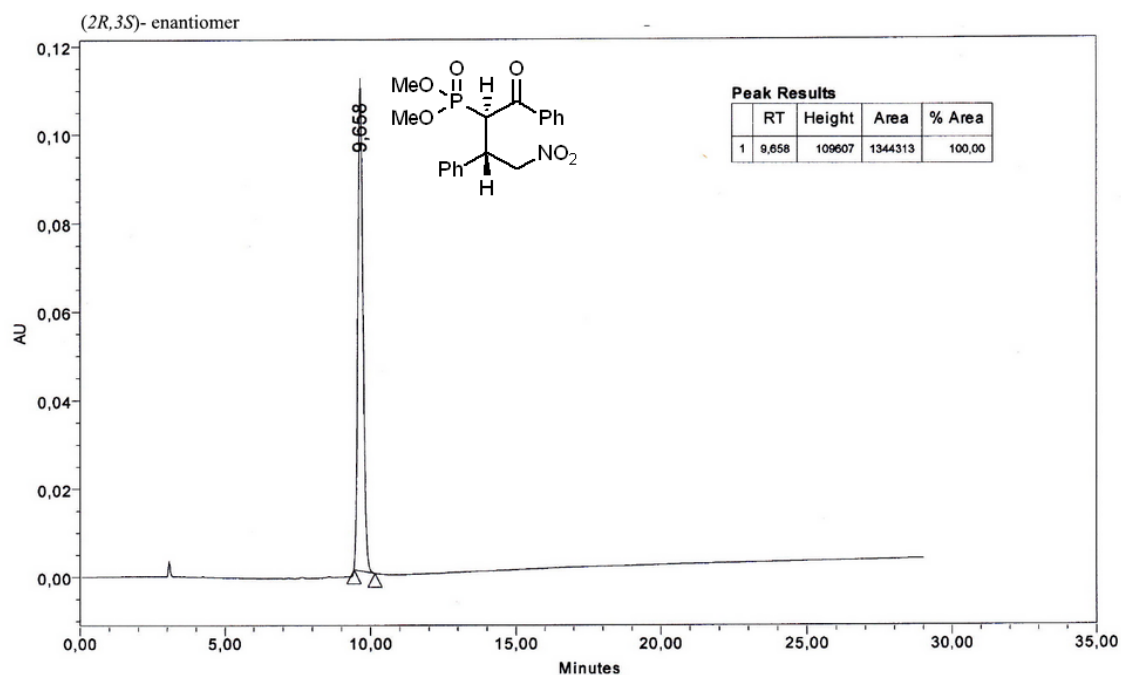

HPLC for dimethyl [(2*S*,3*R*)-4-nitro-1-oxo-1,3-diphenylbutan-2-yl]phosphonate (**6a**)

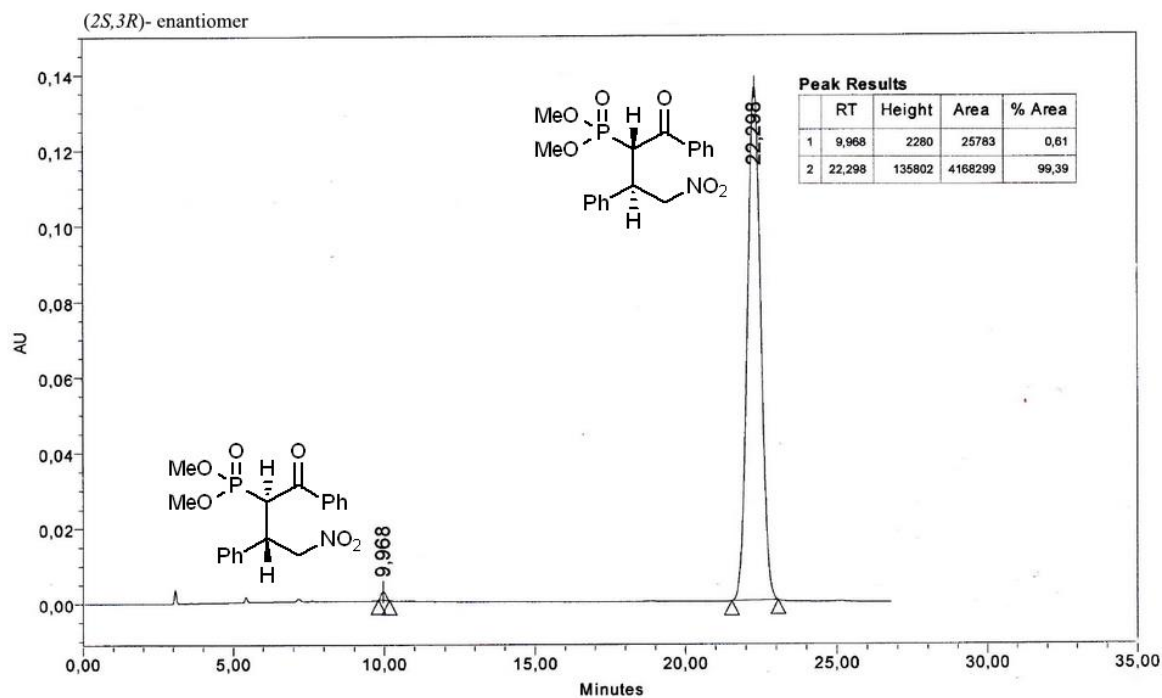



# HPLC for mixture of (2*R*,3*S*)-**6a** and (2*S*,3*R*)-**6a** enantiomers

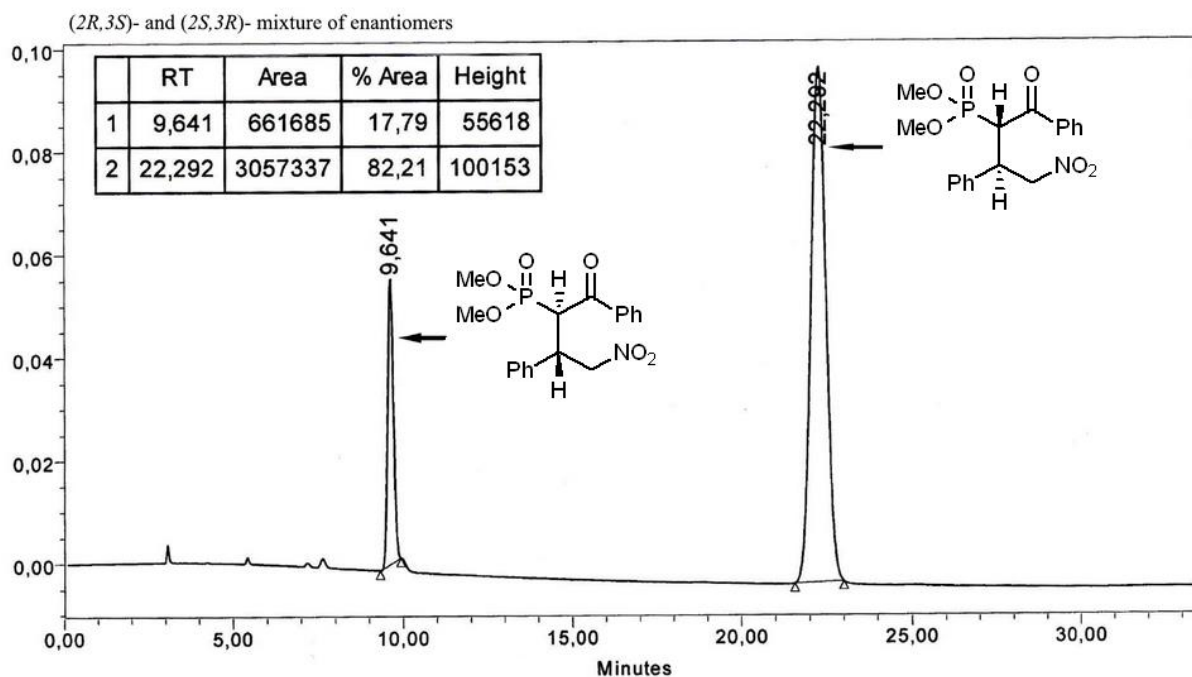

## HPLC for racemic dimethyl [1-(4-methoxyphenyl)-4-nitro-1-oxo-3-phenylbutan-2-yl]-phosphonate (**6b**)

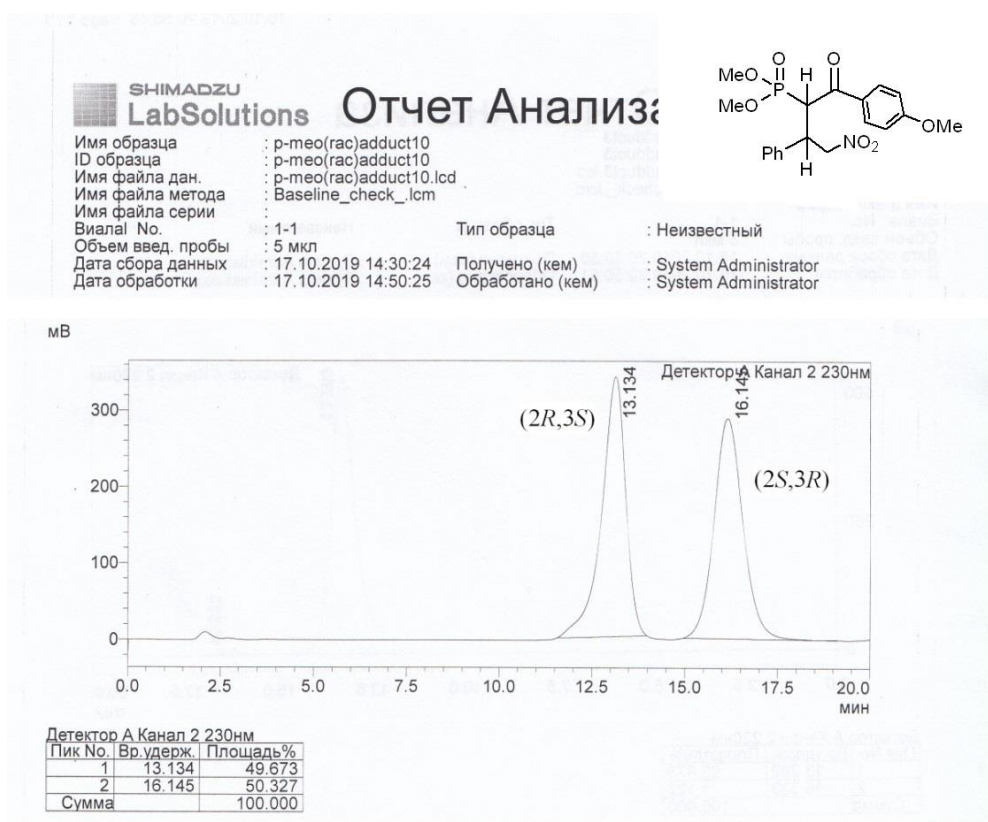



HPLC for dimethyl [(2*R*,3*S*)-1-(4-methoxyphenyl)-4-nitro-1-oxo-3-phenylbutan-2-yl]-phosphonate (**6b**)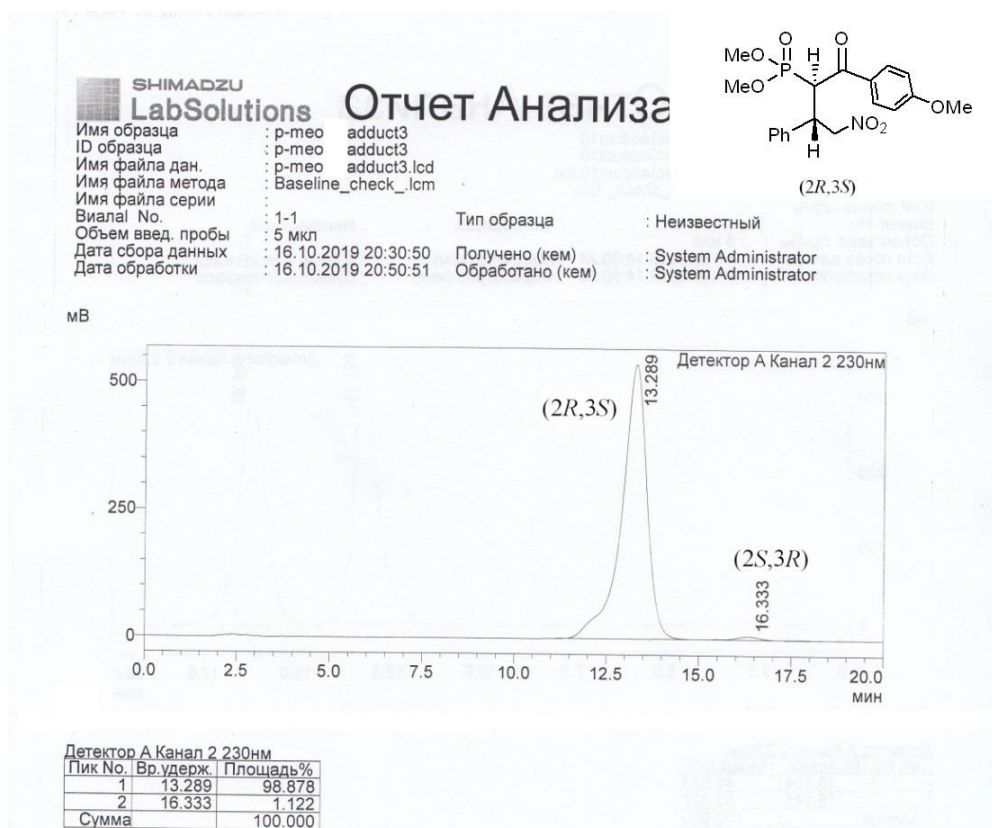HPLC for racemic dimethyl [1-(3-methoxyphenyl)-4-nitro-1-oxo-3-phenylbutan-2-yl]phosphonate (**6c**)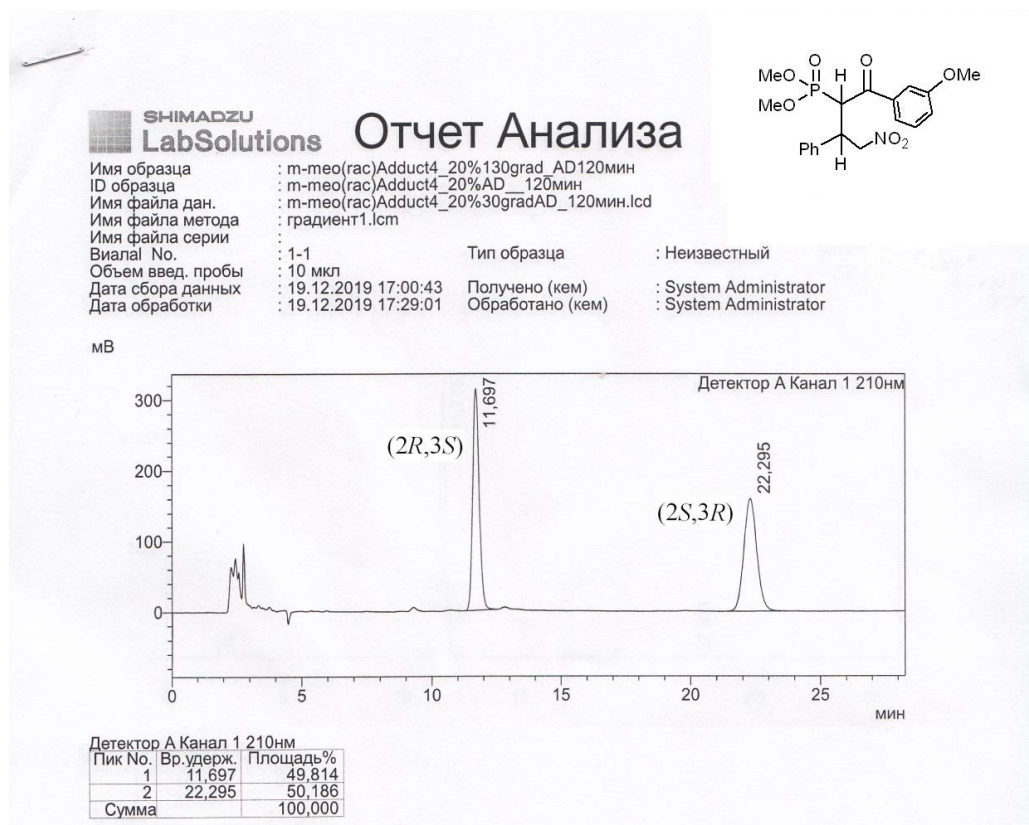



# HPLC for dimethyl [(2*R*,3*S*)-1-(3-methoxyphenyl)-4-nitro-1-oxo-3-phenylbutan-2-yl]phosphonate (**6c**)

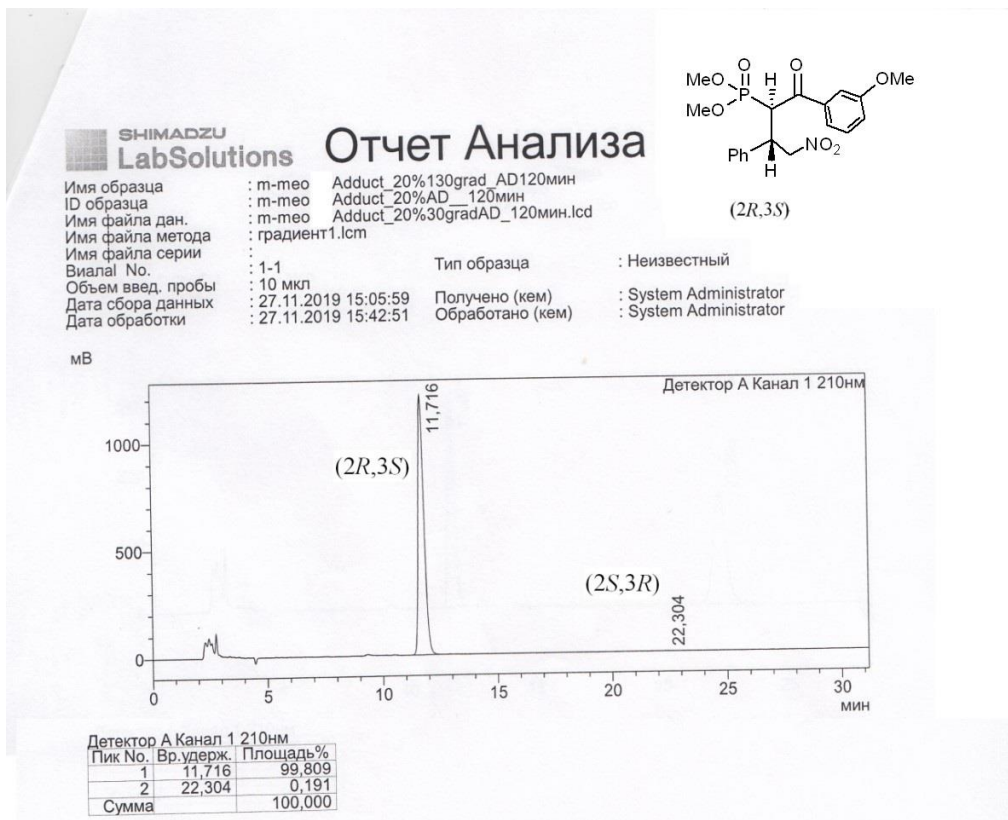

# HPLC for racemic dimethyl [1-(3-methoxyphenyl)-4-nitro-1-oxo-3-phenylbutan-2-yl]phosphonate

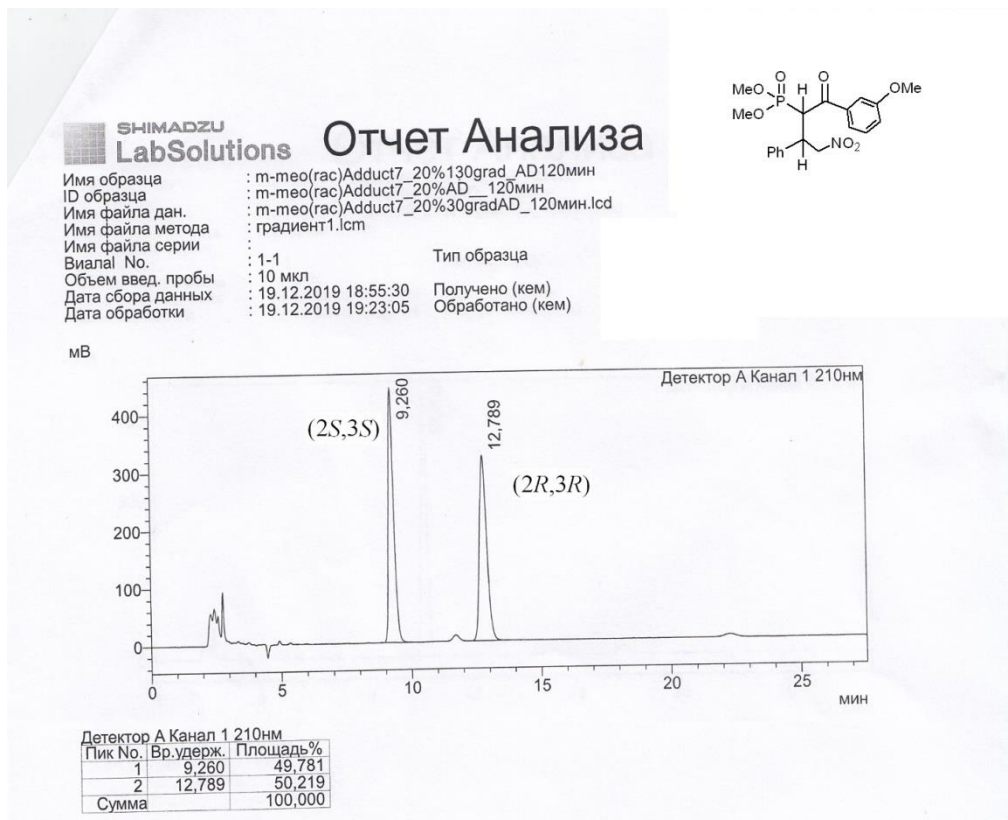



# HPLC for dimethyl [(2*R*,3*R*)-1-(3-methoxyphenyl)-4-nitro-1-oxo-3-phenylbutan-2-yl]phosphonate

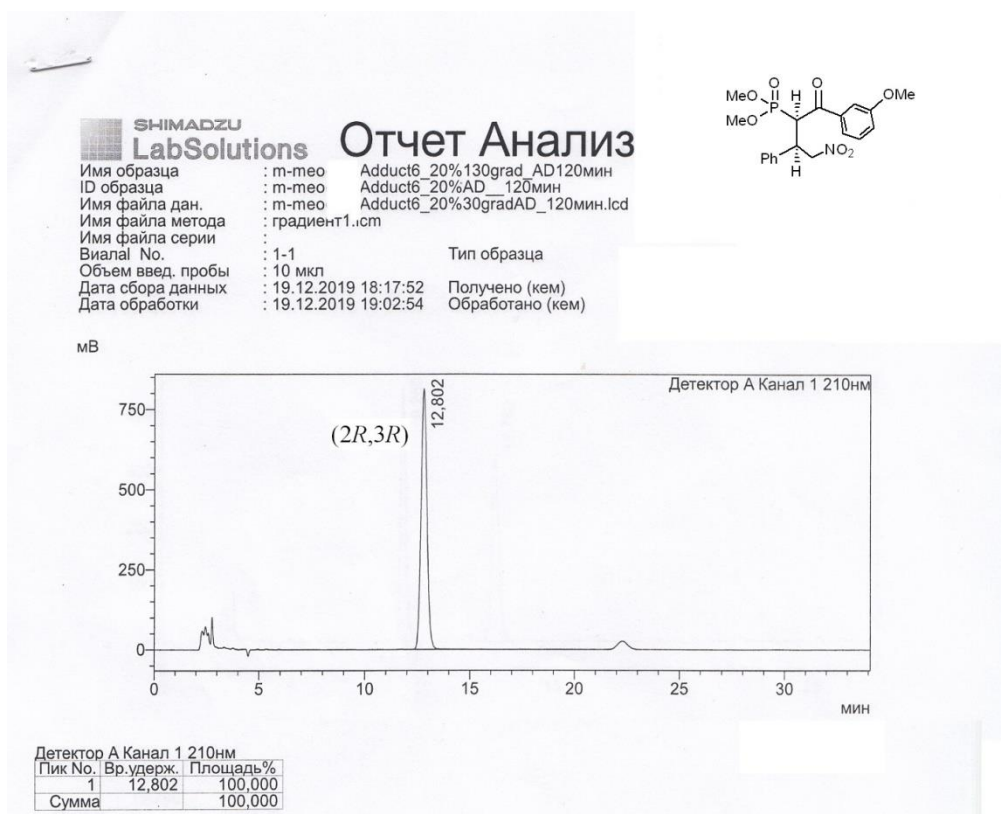

# HPLC for racemic dimethyl [1-(2-methoxyphenyl)-4-nitro-1-oxo-3-phenylbutan-2-yl]phosphonate

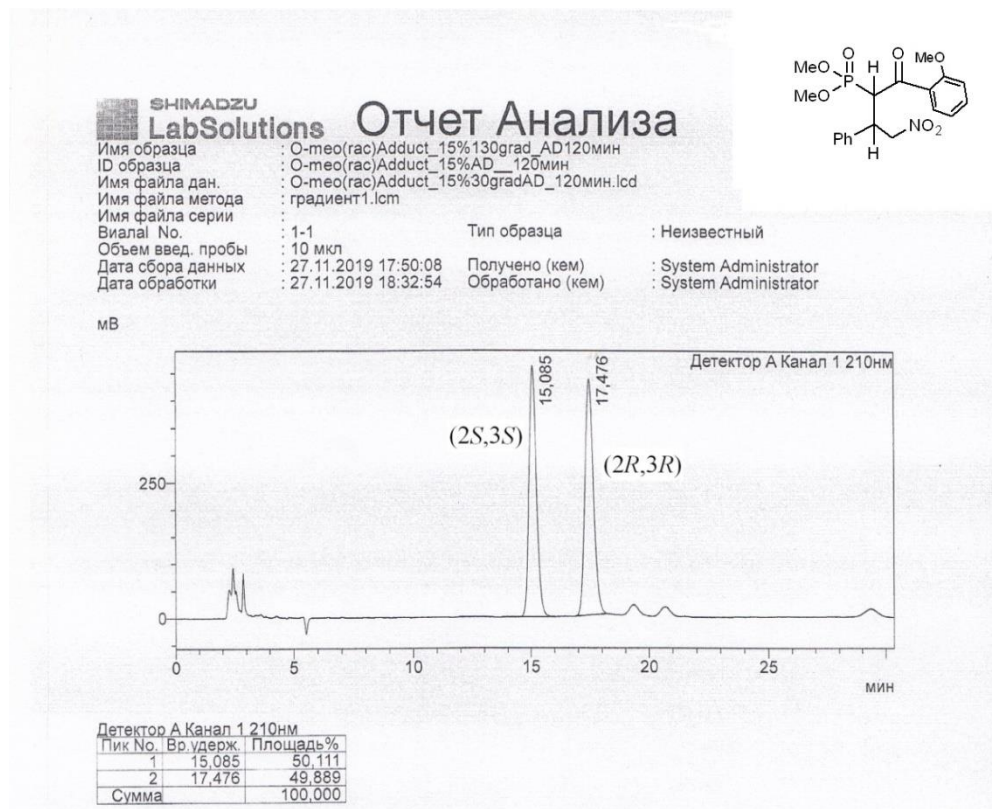



HPLC for dimethyl [(2S,3S)-1-(2-methoxyphenyl)-4-nitro-1-oxo-3-phenylbutan-2-yl]phosphonate (**6d**)

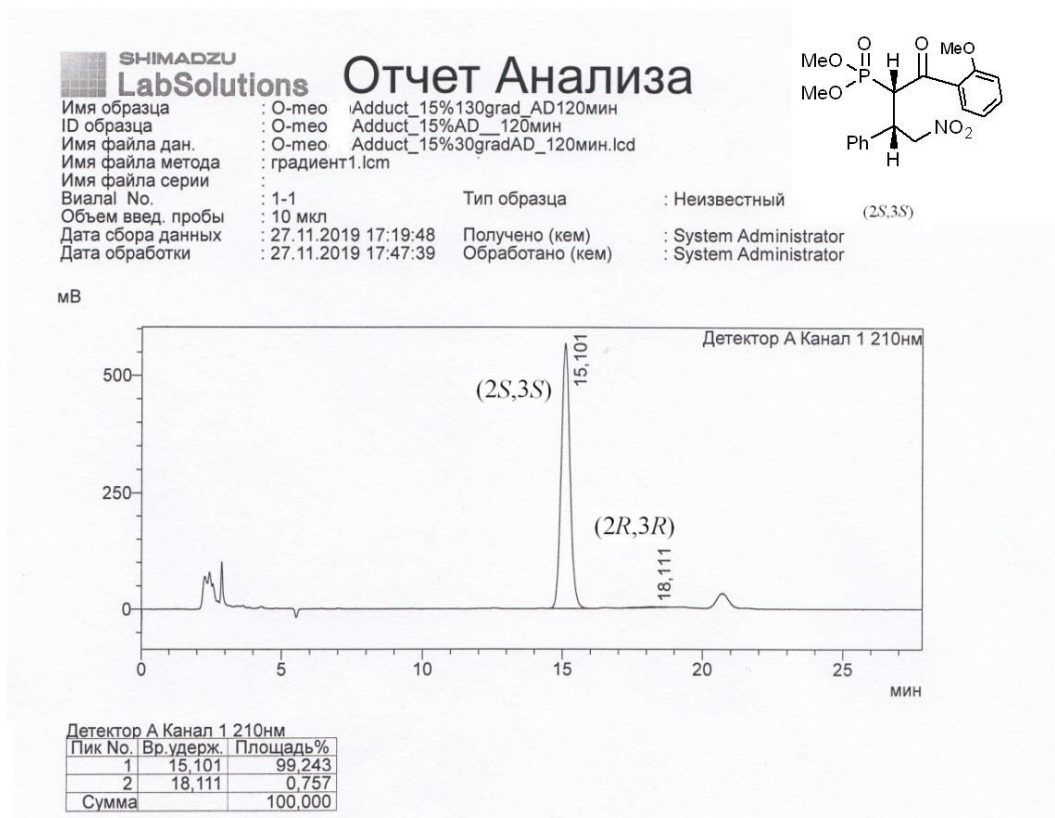

HPLC for racemic dimethyl [1-(adamantan-1-yl)-4-nitro-1-oxo-3-phenylbutan-2-yl]phosphonate

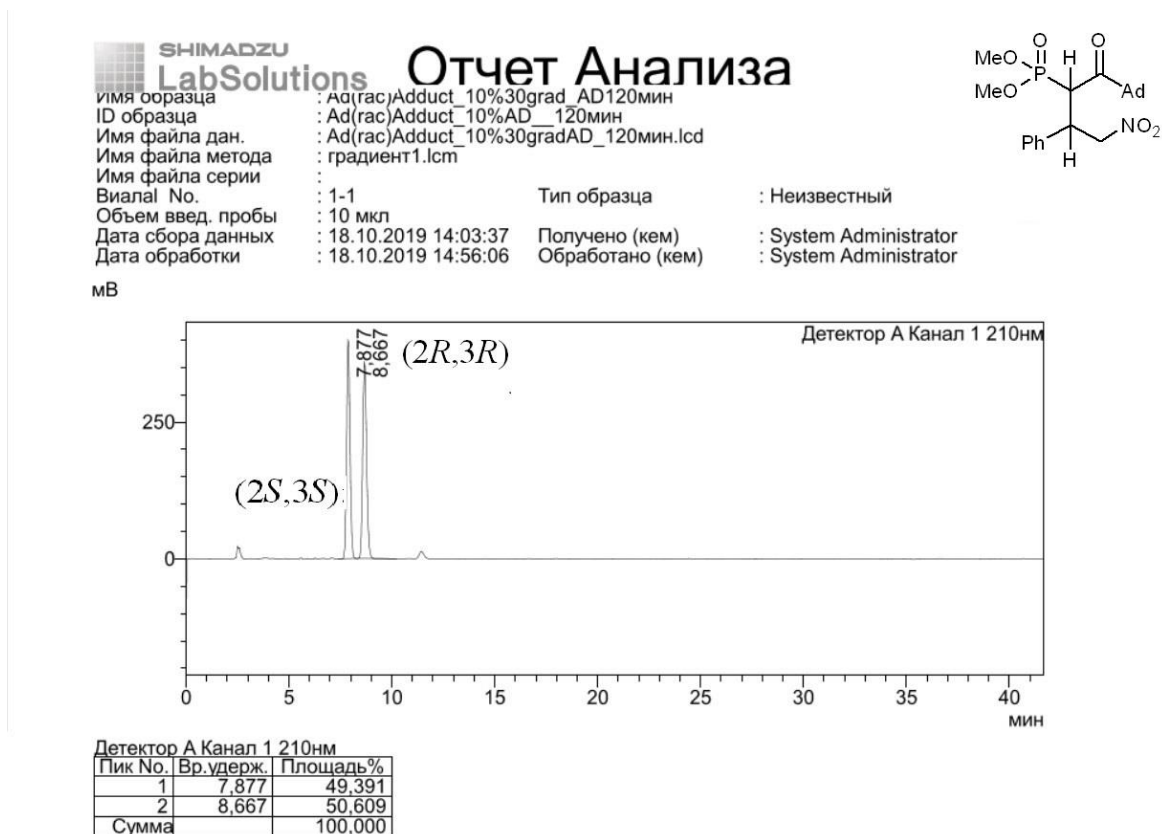



# HPLC for dimethyl [(2S,3S)-1-(adamantan-1-yl)-4-nitro-1-oxo-3-phenylbutan-2-yl]phosphonate (**6f**)

SHIMADZU  
LabSolutions

## Отчет Анализа

Имя образца  
ID образца  
Имя файла дан.  
Имя файла метода  
Имя файла серии  
ВИАЛА! No.  
Объем введ. пробы  
Дата сбора данных  
Дата обработки

: Ad(rr-)Adduct1\_10%30grad\_AD120мин  
: Ad(rr-)Adduct1\_10%AD\_120мин  
: Ad(rr-)Adduct1\_10%30gradAD\_120мин.lcd  
: градиент1.lcm  
: 1-1  
: 10 мкл  
: 18.10.2019 15:04:57  
: 18.10.2019 15:33:02

Тип образца

: Неизвестный

Получено (кем)

: System Administra

Обработано (кем)

: System Administra

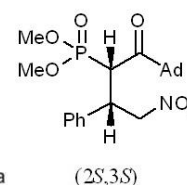

мВ

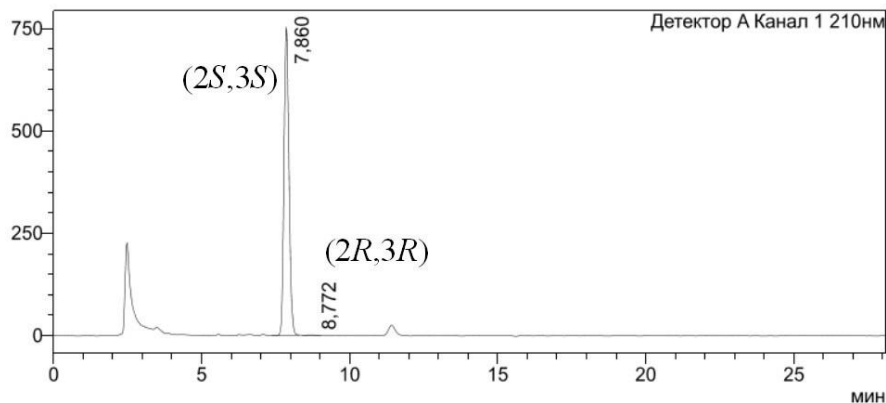

Детектор А Канал 1 210нм

| Пик No. | Вр. удерж. | Площадь% |
|---------|------------|----------|
| 1       | 7.860      | 99.787   |
| 2       | 8.772      | 0.213    |
| Сумма   |            | 100.000  |

# HPLC for racemic dimethyl [2-hydroxy-2,6-dimethyl-5-nitro-4-phenyltetrahydro-2H-pyran-3-yl]phosphonate

SHIMADZU  
LabSolutions

## Отчет Анализа

Имя образца  
ID образца  
Имя файла дан.  
Имя файла метода  
Имя файла серии  
ВИАЛА! No.  
Объем введ. пробы  
Дата сбора данных  
Дата обработки

: tetrahydropyr\_8%30grad\_AD120мин  
: tetrahydropyr\_8%AD\_120мин  
: tetrahydropyr\_8%30gradAD\_120мин.lcd  
: градиент1.lcm  
: 1-1  
: 10 мкл  
: 20.03.2020 19:51:10  
: 20.03.2020 20:50:29

Тип образца

: Неизвестный

Получено (кем)

: System Administrator

Обработано (кем)

: System Administrator

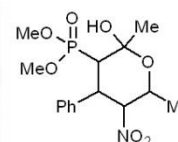

мВ

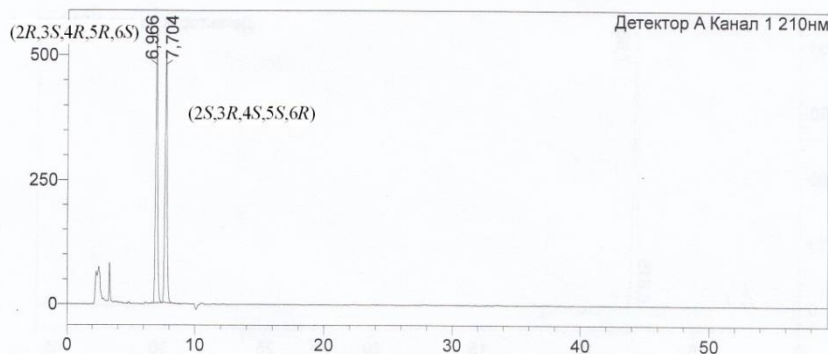

Детектор А Канал 1 210нм

| Пик No. | Вр. удерж. | Площадь% |
|---------|------------|----------|
| 1       | 6.966      | 49.894   |
| 2       | 7.704      | 50.106   |
| Сумма   |            | 100.000  |



HPLC for dimethyl [(2*S*,3*R*,4*S*,5*S*,6*R*)-2-hydroxy-2,6-dimethyl-5-nitro-4-phenyltetrahydro-2*H*-pyran-3-yl]phosphonate (**13b**)

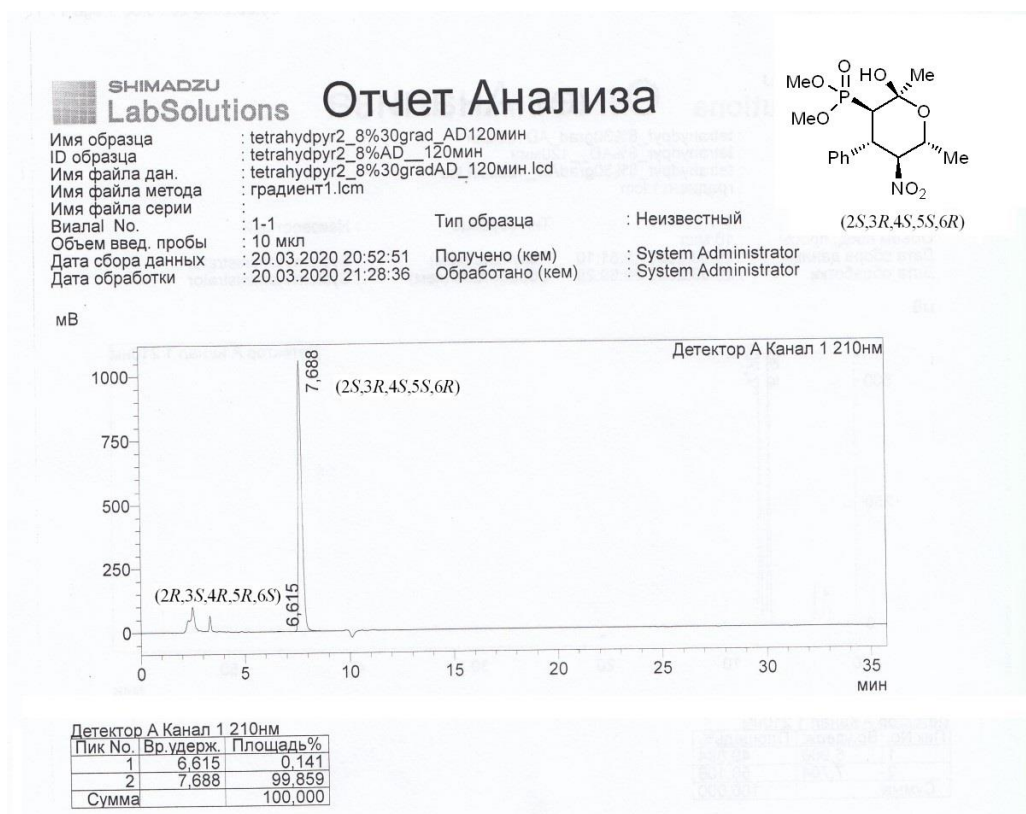



## 10. X-Ray diffraction data of compounds 10a and 13b

X-ray data for compounds **10a** and **13b** were obtained with a Enraf-Nonius CAD-4 diffractometer. CCDC 1919294 and 1846644 deposits contain the supplementary crystallographic data for this article [7,8]. These data can be obtained free of charge from The Cambridge Crystallographic Data Centre via <http://www.ccdc.cam.ac.uk>.

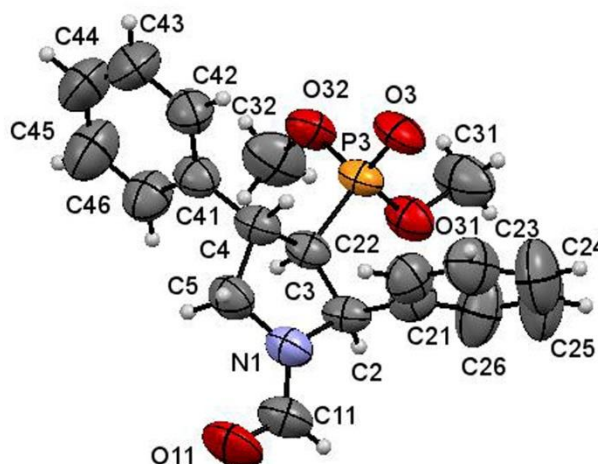

**Table S2.** X-ray diffraction data for dimethyl [(2*R*,3*R*,4*S*)-1-formyl-2,4-diphenylpyrrolidin-3-yl]phosphonate (**10a**) [7]

| CCDC 1919294           |                                                                                                                                     |
|------------------------|-------------------------------------------------------------------------------------------------------------------------------------|
| Empirical formula      | C <sub>19</sub> H <sub>22</sub> NO <sub>4</sub> P                                                                                   |
| Formula weight         | 359.34                                                                                                                              |
| Temperature            | 295(2) K                                                                                                                            |
| Wavelength             | 1.54186 Å (CuKα)                                                                                                                    |
| Crystal system         | monoclinic                                                                                                                          |
| Space group            | <i>P</i> 2 <sub>1</sub>                                                                                                             |
| Unit cell dimensions   | <i>a</i> = 9.1358(13) Å $\alpha$ = 90°<br><i>b</i> = 10.4978(19) Å $\beta$ = 96.830(10)°<br><i>c</i> = 13.5078(17) Å $\gamma$ = 90° |
| Volume                 | 1286.3(3) Å <sup>3</sup>                                                                                                            |
| <i>Z</i>               | 2                                                                                                                                   |
| Density (calculated)   | 0.928 g/cm <sup>3</sup>                                                                                                             |
| Absorption coefficient | 1.087 mm <sup>-1</sup>                                                                                                              |
| <i>F</i> (000)         | 380                                                                                                                                 |
| Crystal size           | 0.020×0.020×0.020 mm                                                                                                                |



|                                              |                                                             |
|----------------------------------------------|-------------------------------------------------------------|
| Theta range for data collection              | 4.875 to 74.995°                                            |
| Index ranges                                 | -11 ≤ <i>h</i> ≤ 11, -13 ≤ <i>k</i> ≤ 13, 0 ≤ <i>l</i> ≤ 16 |
| Reflections collected                        | 5235                                                        |
| Independent reflections                      | 3276                                                        |
| Absorption correction                        | refdelf                                                     |
| Data / restraints / parameters               | 5235 / 1 / 202                                              |
| Goodness-of-fit on <i>F</i> <sup>2</sup>     | 1.058                                                       |
| Final R indices [ <i>I</i> > 2σ( <i>I</i> )] | R1 = 0.1174 wR2 = 0.2912                                    |
| R indices (all data)                         | R1 = 0.1461 wR2 = 0.3231                                    |
| Absolute structure (Flack) parameter         | 0.10(8)                                                     |

**Table S3. Selected bond lengths for compound 10a**

| Nº | Bond        | Bondlength (Å) | Nº | Bond         | Bondlength (Å) |
|----|-------------|----------------|----|--------------|----------------|
| 1  | N(1)-C(11)  | 1.344(13)      | 25 | C(25)-C(26)  | 1.3900         |
| 2  | N(1)-C(5)   | 1.444(14)      | 26 | C(25)-H(25)  | 0.9300         |
| 3  | N(1)-C(2)   | 1.464(12)      | 27 | C(26)-H(26)  | 0.9300         |
| 4  | C(2)-C(21)  | 1.507(11)      | 28 | P(3)-O(3)    | 1.472(7)       |
| 5  | C(2)-C(3)   | 1.521(13)      | 29 | P(3)-O(32)   | 1.562(7)       |
| 6  | C(2)-H(2)   | 0.9800         | 30 | P(3)-O(31)   | 1.566(8)       |
| 7  | C(3)-C(4)   | 1.533(13)      | 31 | O(31)-C(31)  | 1.430(14)      |
| 8  | C(3)-P(3)   | 1.803(9)       | 32 | C(31)-H(31a) | 0.9600         |
| 9  | C(3)-H(3)   | 0.9800         | 33 | C(31)-H(31b) | 0.9600         |
| 10 | C(4)-C(41)  | 1.503(12)      | 34 | C(31)-H(31c) | 0.9600         |
| 11 | C(4)-C(5)   | 1.537(13)      | 35 | O(32)-C(32)  | 1.447(17)      |
| 12 | C(4)-H(4)   | 0.9800         | 36 | C(32)-H(32a) | 0.9600         |
| 13 | C(5)-H(5a)  | 0.9700         | 37 | C(32)-H(32b) | 0.9600         |
| 14 | C(5)-H(5b)  | 0.9700         | 38 | C(32)-H(32c) | 0.9600         |
| 15 | C(11)-O(11) | 1.234(15)      | 39 | C(41)-C(46)  | 1.3900         |
| 16 | C(11)-H(11) | 0.9300         | 40 | C(41)-C(42)  | 1.3900         |
| 17 | C(21)-C(22) | 1.3900         | 41 | C(46)-C(45)  | 1.3900         |
| 18 | C(21)-C(26) | 1.3900         | 42 | C(46)-H(46)  | 0.9300         |
| 19 | C(22)-C(23) | 1.3900         | 43 | C(45)-C(44)  | 1.3900         |
| 20 | C(22)-H(22) | 0.9300         | 44 | C(45)-H(45)  | 0.9300         |
| 21 | C(23)-C(24) | 1.3900         | 45 | C(44)-C(43)  | 1.3900         |
| 22 | C(23)-H(23) | 0.9300         | 46 | C(44)-H(44)  | 0.9300         |
| 23 | C(24)-C(25) | 1.3900         | 47 | C(43)-C(42)  | 0.9300         |
| 24 | C(24)-H(24) | 0.9300         | 48 | C(43)-H(43)  | 0.9300         |



**Table S4. Selected bond angles for compound 10a**

| No | Angle             | (°)       |  | No | Angle               | (°)      |
|----|-------------------|-----------|--|----|---------------------|----------|
| 1  | C(11)-N(1)-C(5)   | 123.3(10) |  | 44 | C(26)-C(25)-H(25)   | 120.0    |
| 2  | C(11)-N(1)-C(2)   | 122.7(10) |  | 45 | C(24)-C(25)-H(25)   | 120.0    |
| 3  | C(5)-N(1)-C(2)    | 113.4(8)  |  | 46 | C(25)-C(26)-C(21)   | 120.0    |
| 4  | N(1)-C(2)-C(21)   | 112.4(7)  |  | 47 | C(25)-C(26)-H(26)   | 120.0    |
| 5  | N(1)-C(2)-C(3)    | 100.2(8)  |  | 48 | C(21)-C(26)-H(26)   | 120.0    |
| 6  | C(21)-C(2)-C(3)   | 117.4(7)  |  | 49 | O(3)-P(3)-O(32)     | 109.1(5) |
| 7  | N(1)-C(2)-H(2)    | 108.8     |  | 50 | O(3)-P(3)-O(31)     | 114.9(5) |
| 8  | C(21)-C(2)-H(2)   | 108.8     |  | 51 | O(32)-P(3)-O(31)    | 106.0(4) |
| 9  | C(3)-C(2)-H(2)    | 108.8     |  | 52 | O(3)-P(3)-C(3)      | 116.6(4) |
| 10 | C(2)-C(3)-C(4)    | 104.9(7)  |  | 53 | O(32)-P(3)-C(3)     | 107.5(4) |
| 11 | C(2)-C(3)-P(3)    | 117.8(7)  |  | 54 | O(31)-P(3)-C(3)     | 101.9(4) |
| 12 | C(4)-C(3)-P(3)    | 112.9(6)  |  | 55 | C(31)-O(31)-P(3)    | 119.7(8) |
| 13 | C(2)-C(3)-H(3)    | 106.9     |  | 56 | O(31)-C(31)-H(31a)  | 109.5    |
| 14 | C(4)-C(3)-H(3)    | 106.9     |  | 57 | O(31)-C(31)-H(31b)  | 109.5    |
| 15 | P(3)-C(3)-H(3)    | 106.9     |  | 58 | H(31a)-C(31)-H(31b) | 109.5    |
| 16 | C(41)-C(4)-C(3)   | 117.2(8)  |  | 59 | O(31)-C(31)-H(31c)  | 109.5    |
| 17 | C(41)-C(4)-C(5)   | 112.2(8)  |  | 60 | H(31a)-C(31)-H(31c) | 109.5    |
| 18 | C(3)-C(4)-C(5)    | 100.5(8)  |  | 61 | H(31b)-C(31)-H(31c) | 109.5    |
| 19 | C(41)-C(4)-H(4)   | 108.8     |  | 62 | C(32)-O(32)-P(3)    | 120.0(8) |
| 20 | C(3)-C(4)-H(4)    | 108.8     |  | 63 | O(32)-C(32)-H(32a)  | 109.5    |
| 21 | C(5)-C(4)-H(4)    | 108.8     |  | 64 | O(32)-C(32)-H(32b)  | 109.5    |
| 22 | N(1)-C(5)-C(4)    | 104.7(8)  |  | 65 | H(32a)-C(32)-H(32b) | 109.5    |
| 23 | N(1)-C(5)-H(5a)   | 110.8     |  | 66 | O(32)-C(32)-H(32c)  | 109.5    |
| 24 | C(4)-C(5)-H(5a)   | 110.8     |  | 67 | H(32a)-C(32)-H(32c) | 109.5    |
| 25 | N(1)-C(5)-H(5b)   | 110.8     |  | 68 | H(32b)-C(32)-H(32c) | 109.5    |
| 26 | C(4)-C(5)-H(5b)   | 110.8     |  | 69 | C(46)-C(41)-C(42)   | 120.0    |
| 27 | H(5A)-C(5)-H(5b)  | 108.9     |  | 70 | C(46)-C(41)-C(4)    | 121.5(6) |
| 28 | O(11)-C(11)-N(1)  | 121.8(13) |  | 71 | C(42)-C(41)-C(4)    | 118.5(6) |
| 29 | O(11)-C(11)-H(11) | 119.1     |  | 72 | C(41)-C(46)-C(45)   | 120.0    |
| 30 | N(1)-C(11)-H(11)  | 119.1     |  | 73 | C(41)-C(46)-H(46)   | 120.0    |
| 31 | C(22)-C(21)-C(26) | 120.0     |  | 74 | C(45)-C(46)-H(46)   | 120.0    |
| 32 | C(22)-C(21)-C(2)  | 122.0(6)  |  | 75 | C(44)-C(45)-C(46)   | 120.0    |
| 33 | C(26)-C(21)-C(2)  | 118.0(6)  |  | 76 | C(44)-C(45)-H(45)   | 120.0    |
| 34 | C(23)-C(22)-C(21) | 120.0     |  | 77 | C(46)-C(45)-H(45)   | 120.0    |
| 35 | C(23)-C(22)-H(22) | 120.0     |  | 78 | C(43)-C(44)-C(45)   | 120.0    |
| 36 | C(21)-C(22)-H(22) | 120.0     |  | 79 | C(43)-C(44)-H(44)   | 120.0    |
| 37 | C(22)-C(23)-C(24) | 120.0     |  | 80 | C(45)-C(44)-H(44)   | 120.0    |
| 38 | C(22)-C(23)-H(23) | 120.0     |  | 81 | C(44)-C(43)-C(42)   | 120.0    |
| 39 | C(24)-C(23)-H(23) | 120.0     |  | 82 | C(44)-C(43)-H(43)   | 120.0    |
| 40 | C(23)-C(24)-C(25) | 120.0     |  | 83 | C(42)-C(43)-H(43)   | 120.0    |
| 41 | C(23)-C(24)-H(24) | 120.0     |  | 84 | C(43)-C(42)-C(41)   | 120.0    |



|    |                   |       |    |                   |       |
|----|-------------------|-------|----|-------------------|-------|
| 42 | C(25)-C(24)-H(24) | 120.0 | 85 | C(43)-C(42)-H(42) | 120.0 |
| 43 | C(26)-C(25)-C(24) | 120.0 | 86 | C(41)-C(42)-H(42) | 120.0 |

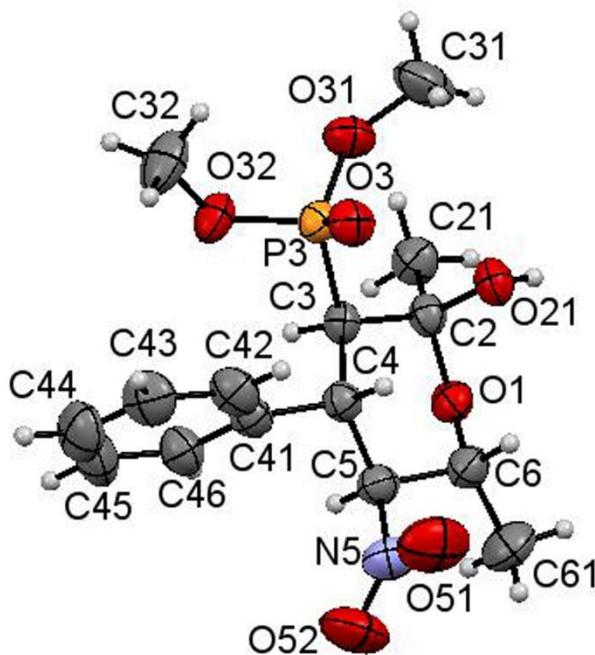

**Table S5.** X-ray diffraction data for dimethyl [(2*S*,3*R*,4*S*,5*S*,6*R*)-6-ethyl-2-hydroxy-2-methyl-5-nitro-4-phenyltetrahydro-2*H*-pyran-3-yl]phosphonate (**13b**) [8]

| CCDC 1846644                    |                                                               |
|---------------------------------|---------------------------------------------------------------|
| Empirical formula               | C <sub>15</sub> H <sub>22</sub> NO <sub>7</sub> P             |
| Formula weight                  | 359.31                                                        |
| Temperature                     | 295(2) K                                                      |
| Wavelength                      | 1.54184 Å                                                     |
| Crystal system                  | orthorhombic                                                  |
| Space group                     | <i>P</i> 2 <sub>1</sub> 2 <sub>1</sub> 2 <sub>1</sub>         |
| Unit cell dimensions            | <i>a</i> = 9.6607(9) Å $\alpha$ = 90°                         |
|                                 | <i>b</i> = 11.0178(10) Å $\beta$ = 90°                        |
|                                 | <i>c</i> = 17.0785(17) Å $\gamma$ = 90°                       |
| Volume                          | 1817.8(3) Å <sup>3</sup>                                      |
| <i>Z</i>                        | 4                                                             |
| Density (calculated)            | 1.313 g/cm <sup>3</sup>                                       |
| Absorption coefficient          | 1.660 mm <sup>-1</sup>                                        |
| <i>F</i> (000)                  | 760                                                           |
| Crystal size                    | 0.020×0.020×0.020 mm                                          |
| Theta range for data collection | 4.776 to 74.882°                                              |
| Index ranges                    | -11 ≤ <i>h</i> ≤ 12, -13 ≤ <i>k</i> ≤ 13, -20 ≤ <i>l</i> ≤ 21 |
| Reflections collected           | 3613                                                          |
| Independent reflections         | 3175                                                          |



|                                      |                              |
|--------------------------------------|------------------------------|
| Absorption correction                | refdelf                      |
| Data / restraints / parameters       | 3613 / 0 / 221               |
| Goodness-of-fit on $F^2$             | 1.026                        |
| Final R indices [ $I > 2\sigma(I)$ ] | $R1 = 0.0335$ $wR2 = 0.0800$ |
| R indices (all data)                 | $R1 = 0.0402$ $wR2 = 0.0835$ |
| Absolute structure (Flack) parameter | 0.001(15)                    |

**Table S6. Selected bond lengths for compound 13b**

| Nº | Bond         | Bondlength (Å) | Nº | Bond         | Bondlength (Å) |
|----|--------------|----------------|----|--------------|----------------|
| 1  | P(3)-O(3)    | 1.4634(18)     | 25 | C(31)-H(31a) | 0.9600         |
| 2  | P(3)-O(31)   | 1.568(2)       | 26 | C(31)-H(31b) | 0.9600         |
| 3  | P(3)-O(32)   | 1.5685(19)     | 27 | C(31)-H(31c) | 0.9600         |
| 4  | P(3)-C(3)    | 1.825(3)       | 28 | O(32)-C(32)  | 1.452(4)       |
| 5  | O(1)-C(6)    | 1.423(3)       | 29 | C(32)-H(32a) | 0.9600         |
| 6  | O(1)-C(2)    | 1.431(3)       | 30 | C(32)-H(32b) | 0.9600         |
| 7  | C(2)-O(21)   | 1.401(3)       | 31 | C(32)-H(32c) | 0.9600         |
| 8  | C(2)-C(21)   | 1.508(4)       | 32 | C(41)-C(46)  | 1.386(4)       |
| 9  | C(2)-C(3)    | 1.547(3)       | 33 | C(41)-C(42)  | 1.388(4)       |
| 10 | C(3)-C(4)    | 1.557(3)       | 34 | C(42)-C(43)  | 1.388(4)       |
| 11 | C(3)-H(3)    | 0.9800         | 35 | C(42)-H(42)  | 0.9300         |
| 12 | C(4)-C(41)   | 1.524(3)       | 36 | C(43)-C(44)  | 1.379(5)       |
| 13 | C(4)-C(5)    | 1.526(4)       | 37 | C(43)-H(43)  | 0.9300         |
| 14 | C(4)-H(4)    | 0.9800         | 38 | C(44)-C(45)  | 1.371(5)       |
| 15 | C(5)-N(5)    | 1.504(4)       | 39 | C(44)-H(44)  | 0.9300         |
| 16 | C(5)-C(6)    | 1.524(4)       | 40 | C(45)-C(46)  | 1.391(4)       |
| 17 | C(5)-H(5)    | 0.9800         | 41 | C(45)-H(45)  | 0.9300         |
| 18 | C(6)-C(61)   | 1.499(4)       | 42 | C(46)-H(46)  | 0.9300         |
| 19 | C(6)-H(6)    | 0.9800         | 43 | N(5)-O(51)   | 1.214(4)       |
| 20 | C(21)-H(21a) | 0.9600         | 44 | N(5)-O(52)   | 1.220(3)       |
| 21 | C(21)-H(21b) | 0.9600         | 45 | C(61)-H(61a) | 0.9600         |
| 22 | C(21)-H(21c) | 0.9600         | 46 | C(61)-H(61b) | 0.9600         |
| 23 | O(21)-H(21)  | 0.79(3)        | 47 | C(61)-H(61c) | 0.9600         |
| 24 | O(31)-C(31)  | 1.443(4)       | 48 |              |                |

**Table S7. Selected bond angles for compound 13b**

| Nº | Angle            | (°)        | Nº | Angle               | (°)      |
|----|------------------|------------|----|---------------------|----------|
| 1  | O(3)-P(3)-O(31)  | 112.32(12) | 45 | C(31)-O(31)-P(3)    | 122.7(2) |
| 2  | O(3)-P(3)-O(32)  | 115.09(12) | 46 | O(31)-C(31)-H(31a)  | 109.5    |
| 3  | O(31)-P(3)-O(32) | 102.67(12) | 47 | O(31)-C(31)-H(31b)  | 109.5    |
| 4  | O(3)-P(3)-C(3)   | 114.77(12) | 48 | H(31a)-C(31)-H(31b) | 109.5    |
| 5  | O(31)-P(3)-C(3)  | 110.55(12) | 49 | O(31)-C(31)-H(31c)  | 109.5    |
| 6  | O(32)-P(3)-C(3)  | 100.22(11) | 50 | H(31a)-C(31)-H(31c) | 109.5    |
| 7  | C(6)-O(1)-C(2)   | 115.6(2)   | 51 | H(31b)-C(31)-H(31c) | 109.5    |
| 8  | O(21)-C(2)-O(1)  | 110.1(2)   | 52 | C(32)-O(32)-P(3)    | 118.4(2) |
| 9  | O(21)-C(2)-C(21) | 113.6(2)   | 53 | O(32)-C(32)-H(32a)  | 109.5    |
| 10 | O(1)-C(2)-C(21)  | 103.8(2)   | 54 | O(32)-C(32)-H(32b)  | 109.5    |
| 11 | O(21)-C(2)-C(3)  | 106.4(2)   | 55 | H(32a)-C(32)-H(32b) | 109.5    |
| 12 | O(1)-C(2)-C(3)   | 109.5(2)   | 56 | O(32)-C(32)-H(32c)  | 109.5    |
| 13 | C(21)-C(2)-C(3)  | 113.5(2)   | 57 | H(32a)-C(32)-H(32c) | 109.5    |



|    |                     |            |    |                     |          |
|----|---------------------|------------|----|---------------------|----------|
| 14 | C(2)-C(3)-C(4)      | 114.1(2)   | 58 | H(32b)-C(32)-H(32c) | 109.5    |
| 15 | C(2)-C(3)-P(3)      | 112.96(18) | 59 | C(46)-C(41)-C(42)   | 119.3(3) |
| 16 | C(4)-C(3)-P(3)      | 107.05(17) | 60 | C(46)-C(41)-C(4)    | 120.6(2) |
| 17 | C(2)-C(3)-H(3)      | 107.5      | 61 | C(42)-C(41)-C(4)    | 120.1(3) |
| 18 | C(4)-C(3)-H(3)      | 107.5      | 62 | C(43)-C(42)-C(41)   | 120.3(3) |
| 19 | P(3)-C(3)-H(3)      | 107.5      | 63 | C(43)-C(42)-H(42)   | 119.9    |
| 20 | C(41)-C(4)-C(5)     | 112.4(2)   | 64 | C(41)-C(42)-H(42)   | 119.9    |
| 21 | C(41)-C(4)-C(3)     | 111.5(2)   | 65 | C(44)-C(43)-C(42)   | 120.1(3) |
| 22 | C(5)-C(4)-C(3)      | 109.2(2)   | 66 | C(44)-C(43)-H(43)   | 120.0    |
| 23 | C(41)-C(4)-H(4)     | 107.9      | 67 | C(42)-C(43)-H(43)   | 120.0    |
| 24 | C(5)-C(4)-H(4)      | 107.9      | 68 | C(45)-C(44)-C(43)   | 119.9(3) |
| 25 | C(3)-C(4)-H(4)      | 107.9      | 69 | C(45)-C(44)-H(44)   | 120.1    |
| 26 | N(5)-C(5)-C(6)      | 108.5(2)   | 70 | C(43)-C(44)-H(44)   | 120.1    |
| 27 | N(5)-C(5)-C(4)      | 109.7(2)   | 71 | C(44)-C(45)-C(46)   | 120.6(3) |
| 28 | C(6)-C(5)-C(4)      | 111.2(2)   | 72 | C(44)-C(45)-H(45)   | 119.7    |
| 29 | N(5)-C(5)-H(5)      | 109.1      | 73 | C(46)-C(45)-H(45)   | 119.7    |
| 30 | C(6)-C(5)-H(5)      | 109.1      | 74 | C(41)-C(46)-C(45)   | 119.9(3) |
| 31 | C(4)-C(5)-H(5)      | 109.1      | 75 | C(41)-C(46)-H(46)   | 120.1    |
| 32 | O(1)-C(6)-C(61)     | 107.3(3)   | 76 | C(45)-C(46)-H(46)   | 120.1    |
| 33 | O(1)-C(6)-C(5)      | 105.6(2)   | 77 | O(51)-N(5)-O(52)    | 124.2(3) |
| 34 | C(61)-C(6)-C(5)     | 114.4(3)   | 78 | O(51)-N(5)-C(5)     | 118.3(3) |
| 35 | O(1)-C(6)-H(6)      | 109.8      | 79 | O(52)-N(5)-C(5)     | 117.5(3) |
| 36 | C(61)-C(6)-H(6)     | 109.8      | 80 | C(6)-C(61)-H(61a)   | 109.5    |
| 37 | C(5)-C(6)-H(6)      | 109.8      | 81 | C(6)-C(61)-H(61b)   | 109.5    |
| 38 | C(2)-C(21)-H(21a)   | 109.5      | 82 | H(61a)-C(61)-H(61b) | 109.5    |
| 39 | C(2)-C(21)-H(21b)   | 109.5      | 83 | C(6)-C(61)-H(61c)   | 109.5    |
| 40 | C(2)-C(21)-H(21c)   | 109.5      | 84 | H(61a)-C(61)-H(61c) | 109.5    |
| 41 | H(21a)-C(21)-H(21b) | 109.5      | 85 | H(61b)-C(61)-H(61c) | 109.5    |
| 42 | H(21a)-C(21)-H(21c) | 109.5      |    |                     |          |
| 43 | H(21b)-C(21)-H(21c) | 109.5      |    |                     |          |
| 44 | C(2)-O(21)-H(21)    | 100(2)     |    |                     |          |



## References

1. Du, T.; Du, F.; Ning, Y.; Peng Y. *Org. Lett.* **2015**, *17*, 1308.
2. Reznikov, A. N.; Sibiryakova, A. E.; Klimochkin, Yu. N. *Russ. J. Gen. Chem.* **2014**, *84*, 2280.
3. Corbel, B.; Medinger, L.; Haelters, J. P.; Sturtz, G. *Synthesis* **1985**, 1048.
4. Evans, D. A.; Mito, S.; Seidel, D. *J. Am. Chem. Soc.* **2007**, *129*, 11583.
5. Reznikov, A. N.; Sibiryakova, A. E.; Rybakov, V. B.; Klimochkin, Yu. N. *Tetrahedron: Asymmetry* **2015**, *26*, 1050.
6. Reznikov, A. N.; Sibiryakova, A. E.; Baimuratov, M. R.; Golovin, E. V.; Rybakov, V. B.; Klimochkin, Yu. N. *Beilstein J. Org. Chem.* **2019**, *15*, 1289.
7. Reznikov, A. N.; Nikerov, D. S.; Sibiryakova, A. E.; Rybakov, V. B.; Golovin, E. V.; Klimochkin, Yu. N. CCDC 1919294: Experimental Crystal Structure Determination. *CSD Commun.*, 2020. doi: [10.5517/ccdc.csd.cc22f5qf](https://doi.org/10.5517/ccdc.csd.cc22f5qf)
8. Reznikov, A. N.; Nikerov, D. S.; Sibiryakova, A. E.; Rybakov, V. B.; Golovin, E. V.; Klimochkin, Yu. N. CCDC 1846644: Experimental Crystal Structure Determination. *CSD Commun.*, 2018. doi: [10.5517/ccdc.csd.cc1zzl5q](https://doi.org/10.5517/ccdc.csd.cc1zzl5q)
